difference (TPs)

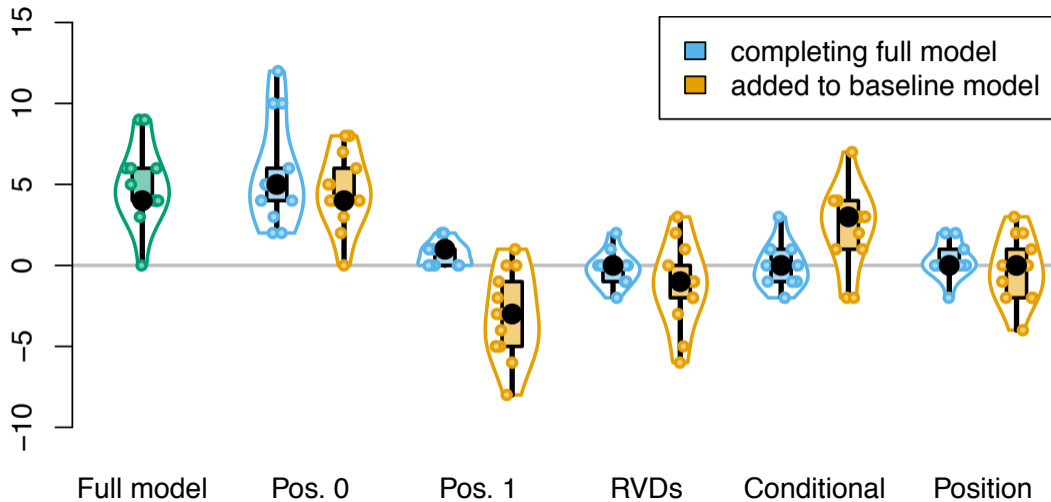

Source: https://geomar-search.kobv.de/redirect.do?ind=34&index=crossrefExt&plv=2&target=crossref_info%3Adoi%2F10.1371%252Fjournal.pcbi.1007206
