# Supplementary material for: PrediTALE: A novel model learned from quantitative data allows for new perspectives on TALE targeting
Source: PLoS Comput Biol. 2019 Jul 11;15(7):e1007206. doi: 10.1371/journal.pcbi.1007206 (PMC6650089; doi:10.1371/journal.pcbi.1007206)
Supplement: S6 Table — (XLS) [file pcbi.1007206.s008.xls]

## Sheet: Cassava
# Seq-ID	Position	Strand	Score	Sequence	Approx. p-value	RVDs	TALE
Manes.14G162500.1.v7.0;pacid=41332173	152	+	0.4805	TATATACGGCTCTCTCCCATT	1.64051e-08	NI-NG-NI-NN-NI-HD-NS-NS-NN-NG-HD-NS-HD-NN-HD-HD-HD-NI-NG-NG	TAL20Xam668
Manes.14G162500.2.v7.0;pacid=41332174	104	+	0.4805	TATATACGGCTCTCTCCCATT	1.64051e-08	NI-NG-NI-NN-NI-HD-NS-NS-NN-NG-HD-NS-HD-NN-HD-HD-HD-NI-NG-NG	TAL20Xam668
Manes.06G123400.1.v7.0;pacid=41303638	190	+	0.466688	TATAAACGCTTCTCGCCCATC	3.40234e-08	NI-NG-NI-NN-NI-HD-NS-NS-NN-NG-HD-NS-HD-NN-HD-HD-HD-NI-NG-NG	TAL20Xam668
Manes.17G072100.1.v7.0;pacid=41329850	52	+	0.449326	TAAAGACATTTCCCTCCCATT	8.31664e-08	NI-NG-NI-NN-NI-HD-NS-NS-NN-NG-HD-NS-HD-NN-HD-HD-HD-NI-NG-NG	TAL20Xam668
Manes.13G028600.1.v7.0;pacid=41337566	219	+	0.438222	TATAAACTCAACCCTCCCATT	1.45328e-07	NI-NG-NI-NN-NI-HD-NS-NS-NN-NG-HD-NS-HD-NN-HD-HD-HD-NI-NG-NG	TAL20Xam668
Manes.11G103500.1.v7.0;pacid=41317851	197	+	0.426826	TATTGATCTATCACACCCATT	2.54916e-07	NI-NG-NI-NN-NI-HD-NS-NS-NN-NG-HD-NS-HD-NN-HD-HD-HD-NI-NG-NG	TAL20Xam668
Manes.02G104100.1.v7.0;pacid=41340935	121	-	0.424235	AATAGACAGGTCTAGCCCATG	2.8921e-07	NI-NG-NI-NN-NI-HD-NS-NS-NN-NG-HD-NS-HD-NN-HD-HD-HD-NI-NG-NG	TAL20Xam668
Manes.08G058300.1.v7.0;pacid=41313310	241	+	0.423405	TATTGACATGTCCAACCCATA	3.01105e-07	NI-NG-NI-NN-NI-HD-NS-NS-NN-NG-HD-NS-HD-NN-HD-HD-HD-NI-NG-NG	TAL20Xam668
Manes.08G134100.1.v7.0;pacid=41314330	177	-	0.423187	TATAGAAAGATCCCTCCCGTT	3.04299e-07	NI-NG-NI-NN-NI-HD-NS-NS-NN-NG-HD-NS-HD-NN-HD-HD-HD-NI-NG-NG	TAL20Xam668
Manes.03G187200.1.v7.0;pacid=41309194	226	+	0.4199	AATCAACACGTCCCCCCCATT	3.56756e-07	NI-NG-NI-NN-NI-HD-NS-NS-NN-NG-HD-NS-HD-NN-HD-HD-HD-NI-NG-NG	TAL20Xam668
Manes.11G101900.1.v7.0;pacid=41318401	281	+	0.419015	TATACACAAACCCCACCAATT	3.72297e-07	NI-NG-NI-NN-NI-HD-NS-NS-NN-NG-HD-NS-HD-NN-HD-HD-HD-NI-NG-NG	TAL20Xam668
Manes.11G101900.2.v7.0;pacid=41318402	281	+	0.419015	TATACACAAACCCCACCAATT	3.72297e-07	NI-NG-NI-NN-NI-HD-NS-NS-NN-NG-HD-NS-HD-NN-HD-HD-HD-NI-NG-NG	TAL20Xam668
Manes.11G101900.3.v7.0;pacid=41318403	281	+	0.419015	TATACACAAACCCCACCAATT	3.72297e-07	NI-NG-NI-NN-NI-HD-NS-NS-NN-NG-HD-NS-HD-NN-HD-HD-HD-NI-NG-NG	TAL20Xam668
Manes.09G029300.1.v7.0;pacid=41310966	327	+	0.418428	TGTAGACCCTTCACACCCAAT	3.82968e-07	NI-NG-NI-NN-NI-HD-NS-NS-NN-NG-HD-NS-HD-NN-HD-HD-HD-NI-NG-NG	TAL20Xam668
Manes.16G091000.1.v7.0;pacid=41320250	340	+	0.41673	TATCAACTCGTAAAACCCATT	4.15521e-07	NI-NG-NI-NN-NI-HD-NS-NS-NN-NG-HD-NS-HD-NN-HD-HD-HD-NI-NG-NG	TAL20Xam668
Manes.16G091000.2.v7.0;pacid=41320251	118	+	0.41673	TATCAACTCGTAAAACCCATT	4.15521e-07	NI-NG-NI-NN-NI-HD-NS-NS-NN-NG-HD-NS-HD-NN-HD-HD-HD-NI-NG-NG	TAL20Xam668
Manes.09G105900.1.v7.0;pacid=41310582	281	+	0.412248	TATAGACGTCTCACTTCCACT	5.14746e-07	NI-NG-NI-NN-NI-HD-NS-NS-NN-NG-HD-NS-HD-NN-HD-HD-HD-NI-NG-NG	TAL20Xam668
Manes.03G061000.1.v7.0;pacid=41309834	166	+	0.410169	TCCAAACTGGTCCCGCCCCTT	5.68149e-07	NI-NG-NI-NN-NI-HD-NS-NS-NN-NG-HD-NS-HD-NN-HD-HD-HD-NI-NG-NG	TAL20Xam668
Manes.02G055600.1.v7.0;pacid=41339587	431	-	0.409764	TATAGAACTATCATTCCCATT	5.7917e-07	NI-NG-NI-NN-NI-HD-NS-NS-NN-NG-HD-NS-HD-NN-HD-HD-HD-NI-NG-NG	TAL20Xam668
Manes.02G216300.1.v7.0;pacid=41341688	187	+	0.409219	TATAAACGAGACACGCCCTTG	5.94313e-07	NI-NG-NI-NN-NI-HD-NS-NS-NN-NG-HD-NS-HD-NN-HD-HD-HD-NI-NG-NG	TAL20Xam668
Manes.02G216300.4.v7.0;pacid=41341689	187	+	0.409219	TATAAACGAGACACGCCCTTG	5.94313e-07	NI-NG-NI-NN-NI-HD-NS-NS-NN-NG-HD-NS-HD-NN-HD-HD-HD-NI-NG-NG	TAL20Xam668
Manes.10G093700.1.v7.0;pacid=41321931	59	-	0.409068	TATATAACGGTAACAACCATT	5.98573e-07	NI-NG-NI-NN-NI-HD-NS-NS-NN-NG-HD-NS-HD-NN-HD-HD-HD-NI-NG-NG	TAL20Xam668
Manes.11G058500.1.v7.0;pacid=41316894	227	-	0.407692	TACAAACAGGTCCAGCCCGTT	6.38787e-07	NI-NG-NI-NN-NI-HD-NS-NS-NN-NG-HD-NS-HD-NN-HD-HD-HD-NI-NG-NG	TAL20Xam668
Manes.18G016500.1.v7.0;pacid=41334283	177	-	0.407265	TTTAGACAACTAAAACCCATT	6.51782e-07	NI-NG-NI-NN-NI-HD-NS-NS-NN-NG-HD-NS-HD-NN-HD-HD-HD-NI-NG-NG	TAL20Xam668
Manes.13G066900.1.v7.0;pacid=41337372	300	+	0.406053	TATACTCTACCCGCACCCATT	6.90087e-07	NI-NG-NI-NN-NI-HD-NS-NS-NN-NG-HD-NS-HD-NN-HD-HD-HD-NI-NG-NG	TAL20Xam668
Manes.01G011200.1.v7.0;pacid=41324626	259	-	0.403874	TATATACAAAAATCACCCATT	7.6445e-07	NI-NG-NI-NN-NI-HD-NS-NS-NN-NG-HD-NS-HD-NN-HD-HD-HD-NI-NG-NG	TAL20Xam668
Manes.05G201500.1.v7.0;pacid=41335616	38	-	0.403608	CATAGTCAACTCTAACCCATT	7.74039e-07	NI-NG-NI-NN-NI-HD-NS-NS-NN-NG-HD-NS-HD-NN-HD-HD-HD-NI-NG-NG	TAL20Xam668
Manes.12G041300.1.v7.0;pacid=41322414	165	+	0.402061	TATATACCTCTCCCTCCTATT	8.32154e-07	NI-NG-NI-NN-NI-HD-NS-NS-NN-NG-HD-NS-HD-NN-HD-HD-HD-NI-NG-NG	TAL20Xam668
Manes.12G041300.2.v7.0;pacid=41322415	165	+	0.402061	TATATACCTCTCCCTCCTATT	8.32154e-07	NI-NG-NI-NN-NI-HD-NS-NS-NN-NG-HD-NS-HD-NN-HD-HD-HD-NI-NG-NG	TAL20Xam668
Manes.04G082900.1.v7.0;pacid=41314758	269	+	0.401164	TATAAAAGTAACGCAACCATT	8.67718e-07	NI-NG-NI-NN-NI-HD-NS-NS-NN-NG-HD-NS-HD-NN-HD-HD-HD-NI-NG-NG	TAL20Xam668
Manes.04G082900.2.v7.0;pacid=41314759	269	+	0.401164	TATAAAAGTAACGCAACCATT	8.67718e-07	NI-NG-NI-NN-NI-HD-NS-NS-NN-NG-HD-NS-HD-NN-HD-HD-HD-NI-NG-NG	TAL20Xam668
Manes.13G051900.1.v7.0;pacid=41337325	116	+	0.400399	AATAAACTGGTCTAGCCCATG	8.99227e-07	NI-NG-NI-NN-NI-HD-NS-NS-NN-NG-HD-NS-HD-NN-HD-HD-HD-NI-NG-NG	TAL20Xam668
Manes.05G029500.1.v7.0;pacid=41336741	86	+	0.399663	TAGAGACAAGCCAAGCACATT	9.30587e-07	NI-NG-NI-NN-NI-HD-NS-NS-NN-NG-HD-NS-HD-NN-HD-HD-HD-NI-NG-NG	TAL20Xam668
Manes.14G079300.1.v7.0;pacid=41331643	182	+	0.398505	TATGGACGAGTCTTATCCATT	9.82018e-07	NI-NG-NI-NN-NI-HD-NS-NS-NN-NG-HD-NS-HD-NN-HD-HD-HD-NI-NG-NG	TAL20Xam668
Manes.08G058700.1.v7.0;pacid=41312500	223	+	0.397889	TATATACAAGTCATGATCATT	1.0105e-06	NI-NG-NI-NN-NI-HD-NS-NS-NN-NG-HD-NS-HD-NN-HD-HD-HD-NI-NG-NG	TAL20Xam668
Manes.15G078200.1.v7.0;pacid=41306624	256	-	0.396783	TATAGAAGACTCCAATCCATT	1.06359e-06	NI-NG-NI-NN-NI-HD-NS-NS-NN-NG-HD-NS-HD-NN-HD-HD-HD-NI-NG-NG	TAL20Xam668
Manes.18G082400.1.v7.0;pacid=41334405	6	+	0.394008	TACAGTAGCATCACTCCCATT	1.20894e-06	NI-NG-NI-NN-NI-HD-NS-NS-NN-NG-HD-NS-HD-NN-HD-HD-HD-NI-NG-NG	TAL20Xam668
Manes.16G125200.1.v7.0;pacid=41319847	52	+	0.393861	CATAAACATGTCACTCCCAAA	1.21716e-06	NI-NG-NI-NN-NI-HD-NS-NS-NN-NG-HD-NS-HD-NN-HD-HD-HD-NI-NG-NG	TAL20Xam668
Manes.16G125200.2.v7.0;pacid=41319848	52	+	0.393861	CATAAACATGTCACTCCCAAA	1.21716e-06	NI-NG-NI-NN-NI-HD-NS-NS-NN-NG-HD-NS-HD-NN-HD-HD-HD-NI-NG-NG	TAL20Xam668
Manes.16G125200.3.v7.0;pacid=41319849	52	+	0.393861	CATAAACATGTCACTCCCAAA	1.21716e-06	NI-NG-NI-NN-NI-HD-NS-NS-NN-NG-HD-NS-HD-NN-HD-HD-HD-NI-NG-NG	TAL20Xam668
Manes.01G134500.1.v7.0;pacid=41325660	261	+	0.392852	AATTGAACAATCTCACCCATT	1.27498e-06	NI-NG-NI-NN-NI-HD-NS-NS-NN-NG-HD-NS-HD-NN-HD-HD-HD-NI-NG-NG	TAL20Xam668
Manes.01G171300.1.v7.0;pacid=41327340	149	+	0.391651	TATTCACAAGTTCAACCCATT	1.34721e-06	NI-NG-NI-NN-NI-HD-NS-NS-NN-NG-HD-NS-HD-NN-HD-HD-HD-NI-NG-NG	TAL20Xam668
Manes.08G001900.1.v7.0;pacid=41314274	159	+	0.391307	CATAGACAAGCCAACCCAATT	1.36862e-06	NI-NG-NI-NN-NI-HD-NS-NS-NN-NG-HD-NS-HD-NN-HD-HD-HD-NI-NG-NG	TAL20Xam668
Manes.05G052900.1.v7.0;pacid=41335155	262	+	0.390765	TATGGACTAGTCCCATCCTTT	1.403e-06	NI-NG-NI-NN-NI-HD-NS-NS-NN-NG-HD-NS-HD-NN-HD-HD-HD-NI-NG-NG	TAL20Xam668
Manes.17G069800.2.v7.0;pacid=41330735	168	+	0.390235	TTTCAACACATCGCAACCATT	1.43746e-06	NI-NG-NI-NN-NI-HD-NS-NS-NN-NG-HD-NS-HD-NN-HD-HD-HD-NI-NG-NG	TAL20Xam668
Manes.08G060700.1.v7.0;pacid=41313301	95	+	0.39023	TTTAAACTAATCACTCTCATT	1.43773e-06	NI-NG-NI-NN-NI-HD-NS-NS-NN-NG-HD-NS-HD-NN-HD-HD-HD-NI-NG-NG	TAL20Xam668
Manes.07G042500.1.v7.0;pacid=41329186	181	+	0.389726	TATAAACAAGTCACATACTTT	1.47124e-06	NI-NG-NI-NN-NI-HD-NS-NS-NN-NG-HD-NS-HD-NN-HD-HD-HD-NI-NG-NG	TAL20Xam668
Manes.10G107100.1.v7.0;pacid=41322001	76	+	0.3896	TAGGGAAAAGTCCCGCCCACT	1.47971e-06	NI-NG-NI-NN-NI-HD-NS-NS-NN-NG-HD-NS-HD-NN-HD-HD-HD-NI-NG-NG	TAL20Xam668
Manes.06G137300.1.v7.0;pacid=41303636	105	+	0.388361	TATATACTGGTCGACACCACT	1.56575e-06	NI-NG-NI-NN-NI-HD-NS-NS-NN-NG-HD-NS-HD-NN-HD-HD-HD-NI-NG-NG	TAL20Xam668
Manes.12G028800.3.v7.0;pacid=41323579	234	+	0.387804	TTTTCACATTTCACACCCATT	1.60599e-06	NI-NG-NI-NN-NI-HD-NS-NS-NN-NG-HD-NS-HD-NN-HD-HD-HD-NI-NG-NG	TAL20Xam668
Manes.01G200000.1.v7.0;pacid=41327143	276	+	0.387291	CATAATCATCCCCCGCCCATT	1.6439e-06	NI-NG-NI-NN-NI-HD-NS-NS-NN-NG-HD-NS-HD-NN-HD-HD-HD-NI-NG-NG	TAL20Xam668
Manes.05G027500.2.v7.0;pacid=41337078	118	+	0.384855	TTTAAACTGGCCTCACCCACT	1.83599e-06	NI-NG-NI-NN-NI-HD-NS-NS-NN-NG-HD-NS-HD-NN-HD-HD-HD-NI-NG-NG	TAL20Xam668
Manes.04G082900.1.v7.0;pacid=41314758	185	+	0.384484	AATAGAAAGCCCAAGCCCATT	1.86707e-06	NI-NG-NI-NN-NI-HD-NS-NS-NN-NG-HD-NS-HD-NN-HD-HD-HD-NI-NG-NG	TAL20Xam668
Manes.04G082900.2.v7.0;pacid=41314759	185	+	0.384484	AATAGAAAGCCCAAGCCCATT	1.86707e-06	NI-NG-NI-NN-NI-HD-NS-NS-NN-NG-HD-NS-HD-NN-HD-HD-HD-NI-NG-NG	TAL20Xam668
Manes.14G058900.1.v7.0;pacid=41331493	149	-	0.384427	TATAGCAGCGTAACTACCATT	1.87193e-06	NI-NG-NI-NN-NI-HD-NS-NS-NN-NG-HD-NS-HD-NN-HD-HD-HD-NI-NG-NG	TAL20Xam668
Manes.06G000300.1.v7.0;pacid=41304225	171	+	0.383728	TATTGTATGGTCGCACCCCTT	1.93203e-06	NI-NG-NI-NN-NI-HD-NS-NS-NN-NG-HD-NS-HD-NN-HD-HD-HD-NI-NG-NG	TAL20Xam668
Manes.11G151300.1.v7.0;pacid=41316608	229	+	0.383413	TATAAACCAGTCAAGATCCTT	1.95971e-06	NI-NG-NI-NN-NI-HD-NS-NS-NN-NG-HD-NS-HD-NN-HD-HD-HD-NI-NG-NG	TAL20Xam668
Manes.13G080600.1.v7.0;pacid=41338671	461	+	0.382303	TACCCACGAGTCTCATCCATT	2.06027e-06	NI-NG-NI-NN-NI-HD-NS-NS-NN-NG-HD-NS-HD-NN-HD-HD-HD-NI-NG-NG	TAL20Xam668
Manes.03G044600.1.v7.0;pacid=41308783	204	-	0.381881	TATACACTCCTCGATCCCACT	2.09984e-06	NI-NG-NI-NN-NI-HD-NS-NS-NN-NG-HD-NS-HD-NN-HD-HD-HD-NI-NG-NG	TAL20Xam668
Manes.15G095700.1.v7.0;pacid=41305487	136	+	0.381169	TACAAAAGCCTCCCGCTCATT	2.16815e-06	NI-NG-NI-NN-NI-HD-NS-NS-NN-NG-HD-NS-HD-NN-HD-HD-HD-NI-NG-NG	TAL20Xam668
Manes.02G119800.1.v7.0;pacid=41340173	35	-	0.380813	TATCGACATGTCTTACCCTTT	2.20312e-06	NI-NG-NI-NN-NI-HD-NS-NS-NN-NG-HD-NS-HD-NN-HD-HD-HD-NI-NG-NG	TAL20Xam668
Manes.12G084900.1.v7.0;pacid=41323654	97	+	0.379977	TTTAGTCAAGTCTAGTCCATT	2.28733e-06	NI-NG-NI-NN-NI-HD-NS-NS-NN-NG-HD-NS-HD-NN-HD-HD-HD-NI-NG-NG	TAL20Xam668
Manes.01G160000.1.v7.0;pacid=41326280	173	+	0.379864	TAAACAAAGCTCTCGCCAATT	2.299e-06	NI-NG-NI-NN-NI-HD-NS-NS-NN-NG-HD-NS-HD-NN-HD-HD-HD-NI-NG-NG	TAL20Xam668
Manes.08G037500.1.v7.0;pacid=41312421	86	-	0.379581	TATAGATGAGTAGAACTCATT	2.3283e-06	NI-NG-NI-NN-NI-HD-NS-NS-NN-NG-HD-NS-HD-NN-HD-HD-HD-NI-NG-NG	TAL20Xam668
Manes.08G001800.1.v7.0;pacid=41312896	107	-	0.379403	CATAGACAAGCCAACCCAATT	2.34692e-06	NI-NG-NI-NN-NI-HD-NS-NS-NN-NG-HD-NS-HD-NN-HD-HD-HD-NI-NG-NG	TAL20Xam668
Manes.05G175100.1.v7.0;pacid=41334689	216	+	0.379148	TAAAAAAGAATCACCCCCATC	2.37394e-06	NI-NG-NI-NN-NI-HD-NS-NS-NN-NG-HD-NS-HD-NN-HD-HD-HD-NI-NG-NG	TAL20Xam668
Manes.04G087000.1.v7.0;pacid=41315120	46	-	0.379036	TGTAGACAATTCTTCCCCATT	2.38584e-06	NI-NG-NI-NN-NI-HD-NS-NS-NN-NG-HD-NS-HD-NN-HD-HD-HD-NI-NG-NG	TAL20Xam668
Manes.05G122300.1.v7.0;pacid=41337084	67	+	0.378944	TTTAGAAAGATCAAACACATT	2.3957e-06	NI-NG-NI-NN-NI-HD-NS-NS-NN-NG-HD-NS-HD-NN-HD-HD-HD-NI-NG-NG	TAL20Xam668
Manes.07G074200.1.v7.0;pacid=41328614	68	+	0.378944	TTTAGAAAGATCAAACACATT	2.3957e-06	NI-NG-NI-NN-NI-HD-NS-NS-NN-NG-HD-NS-HD-NN-HD-HD-HD-NI-NG-NG	TAL20Xam668
Manes.07G074300.1.v7.0;pacid=41329147	67	+	0.378944	TTTAGAAAGATCAAACACATT	2.3957e-06	NI-NG-NI-NN-NI-HD-NS-NS-NN-NG-HD-NS-HD-NN-HD-HD-HD-NI-NG-NG	TAL20Xam668
Manes.02G131300.1.v7.0;pacid=41340351	159	+	0.377736	TATACACATCTCACCCTCACT	2.5287e-06	NI-NG-NI-NN-NI-HD-NS-NS-NN-NG-HD-NS-HD-NN-HD-HD-HD-NI-NG-NG	TAL20Xam668
Manes.18G002300.2.v7.0;pacid=41333907	472	+	0.377157	TATACACCCAACCAAACCATT	2.59486e-06	NI-NG-NI-NN-NI-HD-NS-NS-NN-NG-HD-NS-HD-NN-HD-HD-HD-NI-NG-NG	TAL20Xam668
Manes.18G002300.3.v7.0;pacid=41333908	114	+	0.377157	TATACACCCAACCAAACCATT	2.59486e-06	NI-NG-NI-NN-NI-HD-NS-NS-NN-NG-HD-NS-HD-NN-HD-HD-HD-NI-NG-NG	TAL20Xam668
Manes.14G138600.1.v7.0;pacid=41332201	56	+	0.376932	CAAAGACCGGCCGCTCCCACT	2.62102e-06	NI-NG-NI-NN-NI-HD-NS-NS-NN-NG-HD-NS-HD-NN-HD-HD-HD-NI-NG-NG	TAL20Xam668
Manes.05G171700.1.v7.0;pacid=41336042	253	+	0.376132	TATACATATTTCTTGCCCATT	2.71616e-06	NI-NG-NI-NN-NI-HD-NS-NS-NN-NG-HD-NS-HD-NN-HD-HD-HD-NI-NG-NG	TAL20Xam668
Manes.15G146400.1.v7.0;pacid=41305889	201	+	0.376127	TAGAGACGTGTCCAGCCCTCT	2.71674e-06	NI-NG-NI-NN-NI-HD-NS-NS-NN-NG-HD-NS-HD-NN-HD-HD-HD-NI-NG-NG	TAL20Xam668
Manes.18G016000.1.v7.0;pacid=41334401	122	-	0.375417	TATAGAATCAACTCACCAATT	2.804e-06	NI-NG-NI-NN-NI-HD-NS-NS-NN-NG-HD-NS-HD-NN-HD-HD-HD-NI-NG-NG	TAL20Xam668
Manes.10G073500.1.v7.0;pacid=41322191	27	+	0.375068	TCTAGAAAGGTACCTCCTATT	2.84777e-06	NI-NG-NI-NN-NI-HD-NS-NS-NN-NG-HD-NS-HD-NN-HD-HD-HD-NI-NG-NG	TAL20Xam668
Manes.13G042500.1.v7.0;pacid=41338376	17	-	0.37467	AATTCACCAATCAAGCCCATT	2.89857e-06	NI-NG-NI-NN-NI-HD-NS-NS-NN-NG-HD-NS-HD-NN-HD-HD-HD-NI-NG-NG	TAL20Xam668
Manes.01G127200.1.v7.0;pacid=41327017	80	+	0.374509	CATAAACAACCATCTCCCATT	2.91937e-06	NI-NG-NI-NN-NI-HD-NS-NS-NN-NG-HD-NS-HD-NN-HD-HD-HD-NI-NG-NG	TAL20Xam668
Manes.14G023900.1.v7.0;pacid=41332830	190	+	0.374405	AATAAACGTATCACGCCATTT	2.93286e-06	NI-NG-NI-NN-NI-HD-NS-NS-NN-NG-HD-NS-HD-NN-HD-HD-HD-NI-NG-NG	TAL20Xam668
Manes.06G039700.1.v7.0;pacid=41303994	99	+	0.37438	TTAAAACCAGTCCCACCGATT	2.93611e-06	NI-NG-NI-NN-NI-HD-NS-NS-NN-NG-HD-NS-HD-NN-HD-HD-HD-NI-NG-NG	TAL20Xam668
Manes.06G097500.1.v7.0;pacid=41302723	249	+	0.374262	TGTAGAATTGTAACACACATT	2.95161e-06	NI-NG-NI-NN-NI-HD-NS-NS-NN-NG-HD-NS-HD-NN-HD-HD-HD-NI-NG-NG	TAL20Xam668
Manes.03G114200.1.v7.0;pacid=41308319	311	+	0.374212	CAGAGAAAATTCTAGCCCATT	2.95813e-06	NI-NG-NI-NN-NI-HD-NS-NS-NN-NG-HD-NS-HD-NN-HD-HD-HD-NI-NG-NG	TAL20Xam668
Manes.01G011600.1.v7.0;pacid=41326885	40	+	0.373484	TTTCAAAAGATCAAGCCCATT	3.05519e-06	NI-NG-NI-NN-NI-HD-NS-NS-NN-NG-HD-NS-HD-NN-HD-HD-HD-NI-NG-NG	TAL20Xam668
Manes.08G067200.1.v7.0;pacid=41313810	233	+	0.373357	TATTGATTTATCTCGCCAATT	3.07241e-06	NI-NG-NI-NN-NI-HD-NS-NS-NN-NG-HD-NS-HD-NN-HD-HD-HD-NI-NG-NG	TAL20Xam668
Manes.13G065600.1.v7.0;pacid=41338288	130	+	0.373095	TATAAACCCGAACCGACAATT	3.10827e-06	NI-NG-NI-NN-NI-HD-NS-NS-NN-NG-HD-NS-HD-NN-HD-HD-HD-NI-NG-NG	TAL20Xam668
Manes.07G059500.1.v7.0;pacid=41329294	18	+	0.372992	TAAAAAATAATCATACCCATT	3.12241e-06	NI-NG-NI-NN-NI-HD-NS-NS-NN-NG-HD-NS-HD-NN-HD-HD-HD-NI-NG-NG	TAL20Xam668
Manes.12G133400.1.v7.0;pacid=41322330	185	-	0.37293	TATAGACAAATAGCAACAATA	3.13102e-06	NI-NG-NI-NN-NI-HD-NS-NS-NN-NG-HD-NS-HD-NN-HD-HD-HD-NI-NG-NG	TAL20Xam668
Manes.11G150700.1.v7.0;pacid=41317171	407	+	0.37241	CACACACCCATCGCCACCATT	3.20383e-06	NI-NG-NI-NN-NI-HD-NS-NS-NN-NG-HD-NS-HD-NN-HD-HD-HD-NI-NG-NG	TAL20Xam668
Manes.01G029300.1.v7.0;pacid=41326961	141	+	0.372193	TATTGACGAAACAAACCCATC	3.23474e-06	NI-NG-NI-NN-NI-HD-NS-NS-NN-NG-HD-NS-HD-NN-HD-HD-HD-NI-NG-NG	TAL20Xam668
Manes.04G069900.1.v7.0;pacid=41316040	142	+	0.371636	TATAAACTGGTAGTGACCTTT	3.31539e-06	NI-NG-NI-NN-NI-HD-NS-NS-NN-NG-HD-NS-HD-NN-HD-HD-HD-NI-NG-NG	TAL20Xam668
Manes.14G170400.1.v7.0;pacid=41332016	233	-	0.371462	TATACACATATAGCGCATATT	3.34084e-06	NI-NG-NI-NN-NI-HD-NS-NS-NN-NG-HD-NS-HD-NN-HD-HD-HD-NI-NG-NG	TAL20Xam668
Manes.16G005100.1.v7.0;pacid=41319745	32	+	0.3713	AATAACCGGGTCAAACCCAAT	3.36488e-06	NI-NG-NI-NN-NI-HD-NS-NS-NN-NG-HD-NS-HD-NN-HD-HD-HD-NI-NG-NG	TAL20Xam668
Manes.13G155500.1.v7.0;pacid=41337930	137	+	0.371262	TATAAACCGGTATCGAACTTT	3.37056e-06	NI-NG-NI-NN-NI-HD-NS-NS-NN-NG-HD-NS-HD-NN-HD-HD-HD-NI-NG-NG	TAL20Xam668
Manes.05G201300.1.v7.0;pacid=41336893	23	+	0.371152	TAGCTAAAAGTCAAGCCCATT	3.38699e-06	NI-NG-NI-NN-NI-HD-NS-NS-NN-NG-HD-NS-HD-NN-HD-HD-HD-NI-NG-NG	TAL20Xam668
Manes.14G102200.1.v7.0;pacid=41331494	235	+	0.370889	TATAAAATATACACGCTCATT	3.42649e-06	NI-NG-NI-NN-NI-HD-NS-NS-NN-NG-HD-NS-HD-NN-HD-HD-HD-NI-NG-NG	TAL20Xam668
Manes.14G102200.2.v7.0;pacid=41331495	295	+	0.370889	TATAAAATATACACGCTCATT	3.42649e-06	NI-NG-NI-NN-NI-HD-NS-NS-NN-NG-HD-NS-HD-NN-HD-HD-HD-NI-NG-NG	TAL20Xam668
Manes.14G102200.3.v7.0;pacid=41331496	235	+	0.370889	TATAAAATATACACGCTCATT	3.42649e-06	NI-NG-NI-NN-NI-HD-NS-NS-NN-NG-HD-NS-HD-NN-HD-HD-HD-NI-NG-NG	TAL20Xam668
Manes.11G161600.1.v7.0;pacid=41316845	30	+	0.370809	TATCGCCCCATCACCCCCTTT	3.43858e-06	NI-NG-NI-NN-NI-HD-NS-NS-NN-NG-HD-NS-HD-NN-HD-HD-HD-NI-NG-NG	TAL20Xam668
Manes.17G049000.1.v7.0;pacid=41330040	219	+	0.370535	TATATAGAGATTGCACCCATT	3.48029e-06	NI-NG-NI-NN-NI-HD-NS-NS-NN-NG-HD-NS-HD-NN-HD-HD-HD-NI-NG-NG	TAL20Xam668
Manes.11G126800.1.v7.0;pacid=41316803	204	-	0.370001	TATAAATGGATCATGCACATT	3.56304e-06	NI-NG-NI-NN-NI-HD-NS-NS-NN-NG-HD-NS-HD-NN-HD-HD-HD-NI-NG-NG	TAL20Xam668
Manes.05G180400.1.v7.0;pacid=41335366	208	+	0.36888	TATAGAAGCTTCACCCTCCTT	3.743e-06	NI-NG-NI-NN-NI-HD-NS-NS-NN-NG-HD-NS-HD-NN-HD-HD-HD-NI-NG-NG	TAL20Xam668
Manes.07G065900.1.v7.0;pacid=41328037	136	+	0.368744	TATAAGCCCATCTCAACCCTT	3.76556e-06	NI-NG-NI-NN-NI-HD-NS-NS-NN-NG-HD-NS-HD-NN-HD-HD-HD-NI-NG-NG	TAL20Xam668
Manes.14G063700.1.v7.0;pacid=41330967	72	+	0.368157	TAAAGCAATCTCTCTCCCATT	3.86374e-06	NI-NG-NI-NN-NI-HD-NS-NS-NN-NG-HD-NS-HD-NN-HD-HD-HD-NI-NG-NG	TAL20Xam668
Manes.07G004400.1.v7.0;pacid=41329052	59	-	0.367396	TAGAGACGCGTATCAAACATT	3.99477e-06	NI-NG-NI-NN-NI-HD-NS-NS-NN-NG-HD-NS-HD-NN-HD-HD-HD-NI-NG-NG	TAL20Xam668
Manes.11G079700.1.v7.0;pacid=41317946	184	+	0.367232	AATGGAAGGGCCGAGCCCATT	4.02363e-06	NI-NG-NI-NN-NI-HD-NS-NS-NN-NG-HD-NS-HD-NN-HD-HD-HD-NI-NG-NG	TAL20Xam668
Manes.15G142300.1.v7.0;pacid=41306475	249	+	0.366489	TAAACCCGAGTCTAGCCCAAT	4.15638e-06	NI-NG-NI-NN-NI-HD-NS-NS-NN-NG-HD-NS-HD-NN-HD-HD-HD-NI-NG-NG	TAL20Xam668
Manes.05G066200.1.v7.0;pacid=41334798	77	+	0.366337	TATCGAAATCTCCCTCCCTTT	4.18423e-06	NI-NG-NI-NN-NI-HD-NS-NS-NN-NG-HD-NS-HD-NN-HD-HD-HD-NI-NG-NG	TAL20Xam668
Manes.14G128800.1.v7.0;pacid=41332160	329	+	0.366181	TAAAAACCTCTTCCCCCCATT	4.21288e-06	NI-NG-NI-NN-NI-HD-NS-NS-NN-NG-HD-NS-HD-NN-HD-HD-HD-NI-NG-NG	TAL20Xam668
Manes.17G100600.1.v7.0;pacid=41329807	134	+	0.366168	CATAAAAGTCTCCAGCCCACT	4.21523e-06	NI-NG-NI-NN-NI-HD-NS-NS-NN-NG-HD-NS-HD-NN-HD-HD-HD-NI-NG-NG	TAL20Xam668
Manes.11G012200.1.v7.0;pacid=41318270	66	-	0.366021	TAAAAACCAGTAATGACCATT	4.24232e-06	NI-NG-NI-NN-NI-HD-NS-NS-NN-NG-HD-NS-HD-NN-HD-HD-HD-NI-NG-NG	TAL20Xam668
Manes.07G076800.1.v7.0;pacid=41328986	238	-	0.365969	TATACAAAAGACAAGCTCATT	4.25195e-06	NI-NG-NI-NN-NI-HD-NS-NS-NN-NG-HD-NS-HD-NN-HD-HD-HD-NI-NG-NG	TAL20Xam668
Manes.01G019100.1.v7.0;pacid=41324617	195	+	0.365863	TAAATACCCATCAAGTCCATT	4.27175e-06	NI-NG-NI-NN-NI-HD-NS-NS-NN-NG-HD-NS-HD-NN-HD-HD-HD-NI-NG-NG	TAL20Xam668
Manes.15G127400.1.v7.0;pacid=41304987	104	+	0.365755	AATCGACAAAAAACACCCATT	4.29181e-06	NI-NG-NI-NN-NI-HD-NS-NS-NN-NG-HD-NS-HD-NN-HD-HD-HD-NI-NG-NG	TAL20Xam668
Manes.15G189700.1.v7.0;pacid=41305919	244	+	0.365038	CACAGACAGATCACACAGATT	4.42822e-06	NI-NG-NI-NN-NI-HD-NS-NS-NN-NG-HD-NS-HD-NN-HD-HD-HD-NI-NG-NG	TAL20Xam668
Manes.01G183800.1.v7.0;pacid=41326894	194	-	0.364964	TATAGACACGTCACGTAAAAT	4.44246e-06	NI-NG-NI-NN-NI-HD-NS-NS-NN-NG-HD-NS-HD-NN-HD-HD-HD-NI-NG-NG	TAL20Xam668
Manes.13G084700.1.v7.0;pacid=41338845	13	-	0.364918	TTTAATCCACCCACGCCCATT	4.4515e-06	NI-NG-NI-NN-NI-HD-NS-NS-NN-NG-HD-NS-HD-NN-HD-HD-HD-NI-NG-NG	TAL20Xam668
Manes.17G038600.1.v7.0;pacid=41330412	251	+	0.364902	TATATACCACTCCCTCTCCTT	4.4546e-06	NI-NG-NI-NN-NI-HD-NS-NS-NN-NG-HD-NS-HD-NN-HD-HD-HD-NI-NG-NG	TAL20Xam668
Manes.08G147700.1.v7.0;pacid=41313068	59	+	0.364616	TCTTGACTGGTCTAACTCATT	4.51039e-06	NI-NG-NI-NN-NI-HD-NS-NS-NN-NG-HD-NS-HD-NN-HD-HD-HD-NI-NG-NG	TAL20Xam668
Manes.06G116400.1.v7.0;pacid=41303754	115	+	0.36454	TGTCAACCAGTCACCCCGATT	4.52537e-06	NI-NG-NI-NN-NI-HD-NS-NS-NN-NG-HD-NS-HD-NN-HD-HD-HD-NI-NG-NG	TAL20Xam668
Manes.04G129200.1.v7.0;pacid=41315016	139	+	0.364276	CACAAAAAGCTCACGCCCAGT	4.57761e-06	NI-NG-NI-NN-NI-HD-NS-NS-NN-NG-HD-NS-HD-NN-HD-HD-HD-NI-NG-NG	TAL20Xam668
Manes.05G123400.1.v7.0;pacid=41337060	448	+	0.364054	TTTAAGCGGGTCTCTCCCTTT	4.62221e-06	NI-NG-NI-NN-NI-HD-NS-NS-NN-NG-HD-NS-HD-NN-HD-HD-HD-NI-NG-NG	TAL20Xam668
Manes.09G068800.1.v7.0;pacid=41310875	235	+	0.363984	TATTCAATACTCACACCCATA	4.63624e-06	NI-NG-NI-NN-NI-HD-NS-NS-NN-NG-HD-NS-HD-NN-HD-HD-HD-NI-NG-NG	TAL20Xam668
Manes.09G175400.1.v7.0;pacid=41311523	115	+	0.363974	CATTGATTTGTCACACCCATC	4.63826e-06	NI-NG-NI-NN-NI-HD-NS-NS-NN-NG-HD-NS-HD-NN-HD-HD-HD-NI-NG-NG	TAL20Xam668
Manes.15G101100.1.v7.0;pacid=41305679	201	+	0.363779	TACAAACCCACCGCATCCATT	4.6777e-06	NI-NG-NI-NN-NI-HD-NS-NS-NN-NG-HD-NS-HD-NN-HD-HD-HD-NI-NG-NG	TAL20Xam668
Manes.07G061600.1.v7.0;pacid=41328816	456	+	0.363632	TATAGAAACTGCGAGCCAATT	4.70783e-06	NI-NG-NI-NN-NI-HD-NS-NS-NN-NG-HD-NS-HD-NN-HD-HD-HD-NI-NG-NG	TAL20Xam668
Manes.07G061600.2.v7.0;pacid=41328817	456	+	0.363632	TATAGAAACTGCGAGCCAATT	4.70783e-06	NI-NG-NI-NN-NI-HD-NS-NS-NN-NG-HD-NS-HD-NN-HD-HD-HD-NI-NG-NG	TAL20Xam668
Manes.07G061600.3.v7.0;pacid=41328818	456	+	0.363632	TATAGAAACTGCGAGCCAATT	4.70783e-06	NI-NG-NI-NN-NI-HD-NS-NS-NN-NG-HD-NS-HD-NN-HD-HD-HD-NI-NG-NG	TAL20Xam668
Manes.07G061600.4.v7.0;pacid=41328820	456	+	0.363632	TATAGAAACTGCGAGCCAATT	4.70783e-06	NI-NG-NI-NN-NI-HD-NS-NS-NN-NG-HD-NS-HD-NN-HD-HD-HD-NI-NG-NG	TAL20Xam668
Manes.07G061600.5.v7.0;pacid=41328821	456	+	0.363632	TATAGAAACTGCGAGCCAATT	4.70783e-06	NI-NG-NI-NN-NI-HD-NS-NS-NN-NG-HD-NS-HD-NN-HD-HD-HD-NI-NG-NG	TAL20Xam668
Manes.07G102900.1.v7.0;pacid=41328801	107	+	0.363598	TAAAAAAAAATCAAGCCCTTT	4.71477e-06	NI-NG-NI-NN-NI-HD-NS-NS-NN-NG-HD-NS-HD-NN-HD-HD-HD-NI-NG-NG	TAL20Xam668
Manes.11G137900.1.v7.0;pacid=41318491	196	+	0.363277	TTTGAACTAATCACACCAATT	4.78088e-06	NI-NG-NI-NN-NI-HD-NS-NS-NN-NG-HD-NS-HD-NN-HD-HD-HD-NI-NG-NG	TAL20Xam668
Manes.02G142600.1.v7.0;pacid=41340965	217	+	0.363146	TAAACAACCATCACTACCATT	4.80812e-06	NI-NG-NI-NN-NI-HD-NS-NS-NN-NG-HD-NS-HD-NN-HD-HD-HD-NI-NG-NG	TAL20Xam668
Manes.02G168800.1.v7.0;pacid=41341339	82	+	0.36308	TATAATAATATCTCACTCATT	4.82208e-06	NI-NG-NI-NN-NI-HD-NS-NS-NN-NG-HD-NS-HD-NN-HD-HD-HD-NI-NG-NG	TAL20Xam668
Manes.05G000800.1.v7.0;pacid=41335845	198	+	0.362891	TATTAACTAATTACACCCACT	4.86178e-06	NI-NG-NI-NN-NI-HD-NS-NS-NN-NG-HD-NS-HD-NN-HD-HD-HD-NI-NG-NG	TAL20Xam668
Manes.13G044800.1.v7.0;pacid=41337760	309	+	0.362804	TATACTCGTCTCTTTCCCATT	4.88004e-06	NI-NG-NI-NN-NI-HD-NS-NS-NN-NG-HD-NS-HD-NN-HD-HD-HD-NI-NG-NG	TAL20Xam668
Manes.13G044800.2.v7.0;pacid=41337761	309	+	0.362804	TATACTCGTCTCTTTCCCATT	4.88004e-06	NI-NG-NI-NN-NI-HD-NS-NS-NN-NG-HD-NS-HD-NN-HD-HD-HD-NI-NG-NG	TAL20Xam668
Manes.02G093200.1.v7.0;pacid=41340311	225	+	0.362397	GATAGCCGAGTCGCGCGCATC	4.96711e-06	NI-NG-NI-NN-NI-HD-NS-NS-NN-NG-HD-NS-HD-NN-HD-HD-HD-NI-NG-NG	TAL20Xam668
Manes.07G022200.1.v7.0;pacid=41328973	126	+	0.36188	AATACAAATGTCAAGCCCATG	5.0797e-06	NI-NG-NI-NN-NI-HD-NS-NS-NN-NG-HD-NS-HD-NN-HD-HD-HD-NI-NG-NG	TAL20Xam668
Manes.15G067900.1.v7.0;pacid=41305441	210	+	0.361826	TATGGACCATTTTCGCTCATT	5.09163e-06	NI-NG-NI-NN-NI-HD-NS-NS-NN-NG-HD-NS-HD-NN-HD-HD-HD-NI-NG-NG	TAL20Xam668
Manes.09G068700.1.v7.0;pacid=41311366	249	+	0.361609	TATAAAACCCCCTCACCCAAT	5.13953e-06	NI-NG-NI-NN-NI-HD-NS-NS-NN-NG-HD-NS-HD-NN-HD-HD-HD-NI-NG-NG	TAL20Xam668
Manes.01G163200.1.v7.0;pacid=41324910	281	-	0.360574	TCTAGACAAAACCCCTCCATT	5.37491e-06	NI-NG-NI-NN-NI-HD-NS-NS-NN-NG-HD-NS-HD-NN-HD-HD-HD-NI-NG-NG	TAL20Xam668
Manes.10G002500.1.v7.0;pacid=41321002	101	-	0.360435	TATATAATGATAAACCCCATT	5.40728e-06	NI-NG-NI-NN-NI-HD-NS-NS-NN-NG-HD-NS-HD-NN-HD-HD-HD-NI-NG-NG	TAL20Xam668
Manes.02G192800.1.v7.0;pacid=41339553	147	+	0.360394	TAAAAATAGGACACGCCCAAT	5.4169e-06	NI-NG-NI-NN-NI-HD-NS-NS-NN-NG-HD-NS-HD-NN-HD-HD-HD-NI-NG-NG	TAL20Xam668
Manes.06G165700.1.v7.0;pacid=41304083	239	+	0.360221	TATAAACAGGTTTCCTCCATC	5.45743e-06	NI-NG-NI-NN-NI-HD-NS-NS-NN-NG-HD-NS-HD-NN-HD-HD-HD-NI-NG-NG	TAL20Xam668
Manes.02G163700.1.v7.0;pacid=41339550	108	+	0.360062	GATAGAAGGGTCCCACACCTT	5.49503e-06	NI-NG-NI-NN-NI-HD-NS-NS-NN-NG-HD-NS-HD-NN-HD-HD-HD-NI-NG-NG	TAL20Xam668
Manes.03G164700.1.v7.0;pacid=41309466	276	+	0.360026	TTTAAAAAGGTATATCCCATT	5.50355e-06	NI-NG-NI-NN-NI-HD-NS-NS-NN-NG-HD-NS-HD-NN-HD-HD-HD-NI-NG-NG	TAL20Xam668
Manes.02G189400.1.v7.0;pacid=41340772	11	-	0.359757	CAAAAACAAATCCAGCCCACT	5.56786e-06	NI-NG-NI-NN-NI-HD-NS-NS-NN-NG-HD-NS-HD-NN-HD-HD-HD-NI-NG-NG	TAL20Xam668
Manes.08G112000.1.v7.0;pacid=41314023	138	+	0.359745	TTCCGACGTGTCACATCCATT	5.57074e-06	NI-NG-NI-NN-NI-HD-NS-NS-NN-NG-HD-NS-HD-NN-HD-HD-HD-NI-NG-NG	TAL20Xam668
Manes.13G137400.1.v7.0;pacid=41338435	251	-	0.35922	TATGCACTAGTAACGACAATT	5.69842e-06	NI-NG-NI-NN-NI-HD-NS-NS-NN-NG-HD-NS-HD-NN-HD-HD-HD-NI-NG-NG	TAL20Xam668
Manes.02G058500.1.v7.0;pacid=41340909	83	+	0.359069	TAGAGGAGGGTCCCTCCCCTT	5.73545e-06	NI-NG-NI-NN-NI-HD-NS-NS-NN-NG-HD-NS-HD-NN-HD-HD-HD-NI-NG-NG	TAL20Xam668
Manes.03G176900.1.v7.0;pacid=41307508	159	+	0.359057	TTTGAACTCGTCACTCCAATT	5.73865e-06	NI-NG-NI-NN-NI-HD-NS-NS-NN-NG-HD-NS-HD-NN-HD-HD-HD-NI-NG-NG	TAL20Xam668
Manes.03G176900.2.v7.0;pacid=41307509	91	+	0.359057	TTTGAACTCGTCACTCCAATT	5.73865e-06	NI-NG-NI-NN-NI-HD-NS-NS-NN-NG-HD-NS-HD-NN-HD-HD-HD-NI-NG-NG	TAL20Xam668
Manes.05G111000.1.v7.0;pacid=41335174	59	-	0.358955	TATAGTCCCATCTCACATATT	5.76385e-06	NI-NG-NI-NN-NI-HD-NS-NS-NN-NG-HD-NS-HD-NN-HD-HD-HD-NI-NG-NG	TAL20Xam668
Manes.03G082500.1.v7.0;pacid=41307277	275	+	0.358419	AAAAAACATATCGCACTCATT	5.8983e-06	NI-NG-NI-NN-NI-HD-NS-NS-NN-NG-HD-NS-HD-NN-HD-HD-HD-NI-NG-NG	TAL20Xam668
Manes.14G074000.1.v7.0;pacid=41331427	276	+	0.358283	GATAGACTCAACGCACACATT	5.933e-06	NI-NG-NI-NN-NI-HD-NS-NS-NN-NG-HD-NS-HD-NN-HD-HD-HD-NI-NG-NG	TAL20Xam668
Manes.06G000200.1.v7.0;pacid=41304069	102	-	0.358187	TACATACTCCTCCCATCCATT	5.95755e-06	NI-NG-NI-NN-NI-HD-NS-NS-NN-NG-HD-NS-HD-NN-HD-HD-HD-NI-NG-NG	TAL20Xam668
Manes.07G032500.1.v7.0;pacid=41327865	96	+	0.358091	TATACACATCTAACTAACATT	5.98205e-06	NI-NG-NI-NN-NI-HD-NS-NS-NN-NG-HD-NS-HD-NN-HD-HD-HD-NI-NG-NG	TAL20Xam668
Manes.09G121200.1.v7.0;pacid=41310504	72	+	0.358091	TATACACATCTAACTAACATT	5.98205e-06	NI-NG-NI-NN-NI-HD-NS-NS-NN-NG-HD-NS-HD-NN-HD-HD-HD-NI-NG-NG	TAL20Xam668
Manes.05G041000.1.v7.0;pacid=41337100	140	+	0.357516	TATATACTGATCCCCTCCGTT	6.13185e-06	NI-NG-NI-NN-NI-HD-NS-NS-NN-NG-HD-NS-HD-NN-HD-HD-HD-NI-NG-NG	TAL20Xam668
Manes.01G206600.1.v7.0;pacid=41324592	185	+	0.357293	TATAAACAGCTCACATGCCTT	6.19084e-06	NI-NG-NI-NN-NI-HD-NS-NS-NN-NG-HD-NS-HD-NN-HD-HD-HD-NI-NG-NG	TAL20Xam668
Manes.05G088700.1.v7.0;pacid=41336861	44	-	0.357271	TATTGCCCTGGCACGCCCAAT	6.19673e-06	NI-NG-NI-NN-NI-HD-NS-NS-NN-NG-HD-NS-HD-NN-HD-HD-HD-NI-NG-NG	TAL20Xam668
Manes.09G176100.1.v7.0;pacid=41311478	103	+	0.357223	TGTGGACCAGTCTCAACCAGT	6.20962e-06	NI-NG-NI-NN-NI-HD-NS-NS-NN-NG-HD-NS-HD-NN-HD-HD-HD-NI-NG-NG	TAL20Xam668
Manes.09G155900.1.v7.0;pacid=41311800	254	+	0.356999	TCTCTACTCGTCACTCCCACT	6.26959e-06	NI-NG-NI-NN-NI-HD-NS-NS-NN-NG-HD-NS-HD-NN-HD-HD-HD-NI-NG-NG	TAL20Xam668
Manes.10G046300.1.v7.0;pacid=41321278	257	+	0.356904	TAAAAAAAAGTCATACACATT	6.29504e-06	NI-NG-NI-NN-NI-HD-NS-NS-NN-NG-HD-NS-HD-NN-HD-HD-HD-NI-NG-NG	TAL20Xam668
Manes.01G220500.1.v7.0;pacid=41324995	254	+	0.356692	AACAAACAAGTAAATCCCATT	6.35254e-06	NI-NG-NI-NN-NI-HD-NS-NS-NN-NG-HD-NS-HD-NN-HD-HD-HD-NI-NG-NG	TAL20Xam668
Manes.11G028100.1.v7.0;pacid=41316893	130	+	0.356563	TCCCCACCACTCCCACCCATT	6.38781e-06	NI-NG-NI-NN-NI-HD-NS-NS-NN-NG-HD-NS-HD-NN-HD-HD-HD-NI-NG-NG	TAL20Xam668
Manes.09G082900.1.v7.0;pacid=41311539	13	+	0.356535	TATAGACAAGACCCTCCAACC	6.39555e-06	NI-NG-NI-NN-NI-HD-NS-NS-NN-NG-HD-NS-HD-NN-HD-HD-HD-NI-NG-NG	TAL20Xam668
Manes.03G150100.1.v7.0;pacid=41307793	22	-	0.356478	TATAAAACATACACACACATT	6.41112e-06	NI-NG-NI-NN-NI-HD-NS-NS-NN-NG-HD-NS-HD-NN-HD-HD-HD-NI-NG-NG	TAL20Xam668
Manes.09G186500.1.v7.0;pacid=41310241	258	+	0.356227	TATAAACTCCTCCTCCGCATT	6.48061e-06	NI-NG-NI-NN-NI-HD-NS-NS-NN-NG-HD-NS-HD-NN-HD-HD-HD-NI-NG-NG	TAL20Xam668
Manes.11G137900.1.v7.0;pacid=41318491	252	+	0.356183	TACACAAAGATTACGACCATT	6.49263e-06	NI-NG-NI-NN-NI-HD-NS-NS-NN-NG-HD-NS-HD-NN-HD-HD-HD-NI-NG-NG	TAL20Xam668
Manes.06G135600.1.v7.0;pacid=41303261	101	-	0.356162	TTTAAACATGTAAAGCGCATT	6.49869e-06	NI-NG-NI-NN-NI-HD-NS-NS-NN-NG-HD-NS-HD-NN-HD-HD-HD-NI-NG-NG	TAL20Xam668
Manes.04G163300.1.v7.0;pacid=41315808	166	+	0.35605	TATATTCTCTTCTCCACCATT	6.52993e-06	NI-NG-NI-NN-NI-HD-NS-NS-NN-NG-HD-NS-HD-NN-HD-HD-HD-NI-NG-NG	TAL20Xam668
Manes.04G163300.2.v7.0;pacid=41315809	166	+	0.35605	TATATTCTCTTCTCCACCATT	6.52993e-06	NI-NG-NI-NN-NI-HD-NS-NS-NN-NG-HD-NS-HD-NN-HD-HD-HD-NI-NG-NG	TAL20Xam668
Manes.06G007800.1.v7.0;pacid=41303842	85	+	0.355698	TATAAACATTTCAAATACATT	6.62895e-06	NI-NG-NI-NN-NI-HD-NS-NS-NN-NG-HD-NS-HD-NN-HD-HD-HD-NI-NG-NG	TAL20Xam668
Manes.06G007800.2.v7.0;pacid=41303843	85	+	0.355698	TATAAACATTTCAAATACATT	6.62895e-06	NI-NG-NI-NN-NI-HD-NS-NS-NN-NG-HD-NS-HD-NN-HD-HD-HD-NI-NG-NG	TAL20Xam668
Manes.13G133000.1.v7.0;pacid=41338864	201	+	0.355381	TATATATACATCTCCTCCATT	6.71944e-06	NI-NG-NI-NN-NI-HD-NS-NS-NN-NG-HD-NS-HD-NN-HD-HD-HD-NI-NG-NG	TAL20Xam668
Manes.05G115200.1.v7.0;pacid=41335073	187	-	0.355362	CGTAAAACTGGCACGCCCATT	6.72506e-06	NI-NG-NI-NN-NI-HD-NS-NS-NN-NG-HD-NS-HD-NN-HD-HD-HD-NI-NG-NG	TAL20Xam668
Manes.S109000.1.v7.0;pacid=41309410	111	+	0.355355	TTCAGACACGTAGCTCTCATT	6.72698e-06	NI-NG-NI-NN-NI-HD-NS-NS-NN-NG-HD-NS-HD-NN-HD-HD-HD-NI-NG-NG	TAL20Xam668
Manes.02G208000.1.v7.0;pacid=41341519	23	+	0.354933	TCTAAACAGGGAACACCGATT	6.84954e-06	NI-NG-NI-NN-NI-HD-NS-NS-NN-NG-HD-NS-HD-NN-HD-HD-HD-NI-NG-NG	TAL20Xam668
Manes.06G084800.2.v7.0;pacid=41304410	189	+	0.354917	CATTCACAAGTCAACCCAATT	6.85413e-06	NI-NG-NI-NN-NI-HD-NS-NS-NN-NG-HD-NS-HD-NN-HD-HD-HD-NI-NG-NG	TAL20Xam668
Manes.07G121400.1.v7.0;pacid=41328027	96	+	0.354886	TCAAAACTTTTAACACCCATT	6.86333e-06	NI-NG-NI-NN-NI-HD-NS-NS-NN-NG-HD-NS-HD-NN-HD-HD-HD-NI-NG-NG	TAL20Xam668
Manes.01G214000.1.v7.0;pacid=41326317	6	-	0.35482	TGTAGACTCCACGCTACCATT	6.88251e-06	NI-NG-NI-NN-NI-HD-NS-NS-NN-NG-HD-NS-HD-NN-HD-HD-HD-NI-NG-NG	TAL20Xam668
Manes.02G000400.1.v7.0;pacid=41340993	181	+	0.35468	TTTAAAAAAATATCAACCATT	6.92393e-06	NI-NG-NI-NN-NI-HD-NS-NS-NN-NG-HD-NS-HD-NN-HD-HD-HD-NI-NG-NG	TAL20Xam668
Manes.10G094100.1.v7.0;pacid=41321392	184	+	0.354635	TATAAATTTATCACAACCTTT	6.93734e-06	NI-NG-NI-NN-NI-HD-NS-NS-NN-NG-HD-NS-HD-NN-HD-HD-HD-NI-NG-NG	TAL20Xam668
Manes.13G101600.1.v7.0;pacid=41337804	46	+	0.354478	TATTTACTTGTCTTGCACATT	6.98394e-06	NI-NG-NI-NN-NI-HD-NS-NS-NN-NG-HD-NS-HD-NN-HD-HD-HD-NI-NG-NG	TAL20Xam668
Manes.13G101600.2.v7.0;pacid=41337805	46	+	0.354478	TATTTACTTGTCTTGCACATT	6.98394e-06	NI-NG-NI-NN-NI-HD-NS-NS-NN-NG-HD-NS-HD-NN-HD-HD-HD-NI-NG-NG	TAL20Xam668
Manes.03G067500.1.v7.0;pacid=41309788	232	+	0.354417	TATGAACCAGTCTCTTCAATT	7.00217e-06	NI-NG-NI-NN-NI-HD-NS-NS-NN-NG-HD-NS-HD-NN-HD-HD-HD-NI-NG-NG	TAL20Xam668
Manes.17G000400.1.v7.0;pacid=41330800	13	-	0.354307	TATATGCAACCCAAACCCATT	7.03514e-06	NI-NG-NI-NN-NI-HD-NS-NS-NN-NG-HD-NS-HD-NN-HD-HD-HD-NI-NG-NG	TAL20Xam668
Manes.03G136000.2.v7.0;pacid=41309703	42	-	0.354292	TTTATAAGAGTACCGCCAATT	7.03957e-06	NI-NG-NI-NN-NI-HD-NS-NS-NN-NG-HD-NS-HD-NN-HD-HD-HD-NI-NG-NG	TAL20Xam668
Manes.06G132900.1.v7.0;pacid=41304407	347	+	0.354081	CGCACACGAATCACGCCCCTT	7.10321e-06	NI-NG-NI-NN-NI-HD-NS-NS-NN-NG-HD-NS-HD-NN-HD-HD-HD-NI-NG-NG	TAL20Xam668
Manes.12G095400.1.v7.0;pacid=41323114	54	-	0.353967	TATATAATAGTAAAGCCGATT	7.1378e-06	NI-NG-NI-NN-NI-HD-NS-NS-NN-NG-HD-NS-HD-NN-HD-HD-HD-NI-NG-NG	TAL20Xam668
Manes.02G206800.1.v7.0;pacid=41341730	314	+	0.353872	TATTGAAGTTTCCCTCTCATT	7.16693e-06	NI-NG-NI-NN-NI-HD-NS-NS-NN-NG-HD-NS-HD-NN-HD-HD-HD-NI-NG-NG	TAL20Xam668
Manes.12G040300.1.v7.0;pacid=41322740	172	-	0.353849	TATTGACCAACCACGCCAATC	7.17383e-06	NI-NG-NI-NN-NI-HD-NS-NS-NN-NG-HD-NS-HD-NN-HD-HD-HD-NI-NG-NG	TAL20Xam668
Manes.11G075600.1.v7.0;pacid=41318489	167	-	0.3537	TATAGAAAGGCCTCTACGATT	7.21967e-06	NI-NG-NI-NN-NI-HD-NS-NS-NN-NG-HD-NS-HD-NN-HD-HD-HD-NI-NG-NG	TAL20Xam668
Manes.11G110500.1.v7.0;pacid=41316902	429	+	0.353633	TATACACACAACGCACTCAGT	7.2401e-06	NI-NG-NI-NN-NI-HD-NS-NS-NN-NG-HD-NS-HD-NN-HD-HD-HD-NI-NG-NG	TAL20Xam668
Manes.09G139600.1.v7.0;pacid=41311325	203	-	0.353573	TATAGAAAAGTAGCGACTGTT	7.25889e-06	NI-NG-NI-NN-NI-HD-NS-NS-NN-NG-HD-NS-HD-NN-HD-HD-HD-NI-NG-NG	TAL20Xam668
Manes.17G113400.1.v7.0;pacid=41330395	192	+	0.353424	AATCAACCCATCTCACACATT	7.305e-06	NI-NG-NI-NN-NI-HD-NS-NS-NN-NG-HD-NS-HD-NN-HD-HD-HD-NI-NG-NG	TAL20Xam668
Manes.15G185600.1.v7.0;pacid=41307211	164	+	0.353278	TATGCACAGATATCTCACATT	7.35074e-06	NI-NG-NI-NN-NI-HD-NS-NS-NN-NG-HD-NS-HD-NN-HD-HD-HD-NI-NG-NG	TAL20Xam668
Manes.06G136300.1.v7.0;pacid=41303886	231	+	0.352847	AACTCTCAAGTCACGCCCATT	7.48663e-06	NI-NG-NI-NN-NI-HD-NS-NS-NN-NG-HD-NS-HD-NN-HD-HD-HD-NI-NG-NG	TAL20Xam668
Manes.13G100300.1.v7.0;pacid=41338689	164	-	0.35262	AATTCACCCATCAAACCCATT	7.55954e-06	NI-NG-NI-NN-NI-HD-NS-NS-NN-NG-HD-NS-HD-NN-HD-HD-HD-NI-NG-NG	TAL20Xam668
Manes.18G034600.1.v7.0;pacid=41333388	12	-	0.352617	CAGACACACGCCACGCCCATA	7.56046e-06	NI-NG-NI-NN-NI-HD-NS-NS-NN-NG-HD-NS-HD-NN-HD-HD-HD-NI-NG-NG	TAL20Xam668
Manes.S073100.1.v7.0;pacid=41327492	62	+	0.352548	TATAGAAAAATATCATCTATT	7.58262e-06	NI-NG-NI-NN-NI-HD-NS-NS-NN-NG-HD-NS-HD-NN-HD-HD-HD-NI-NG-NG	TAL20Xam668
Manes.03G103800.1.v7.0;pacid=41309506	222	+	0.352533	TATATGATGGACACGCCCATC	7.58752e-06	NI-NG-NI-NN-NI-HD-NS-NS-NN-NG-HD-NS-HD-NN-HD-HD-HD-NI-NG-NG	TAL20Xam668
Manes.03G097300.1.v7.0;pacid=41309631	327	+	0.352238	TAAACACAACTCAAGAACATT	7.68333e-06	NI-NG-NI-NN-NI-HD-NS-NS-NN-NG-HD-NS-HD-NN-HD-HD-HD-NI-NG-NG	TAL20Xam668
Manes.03G097300.2.v7.0;pacid=41309632	449	+	0.352238	TAAACACAACTCAAGAACATT	7.68333e-06	NI-NG-NI-NN-NI-HD-NS-NS-NN-NG-HD-NS-HD-NN-HD-HD-HD-NI-NG-NG	TAL20Xam668
Manes.16G109900.1.v7.0;pacid=41319265	102	-	0.352134	CAAAGAATAGTCTCTCCAATT	7.71737e-06	NI-NG-NI-NN-NI-HD-NS-NS-NN-NG-HD-NS-HD-NN-HD-HD-HD-NI-NG-NG	TAL20Xam668
Manes.06G168100.1.v7.0;pacid=41304424	99	+	0.352	TATACACGACCCGCTCACCTT	7.7615e-06	NI-NG-NI-NN-NI-HD-NS-NS-NN-NG-HD-NS-HD-NN-HD-HD-HD-NI-NG-NG	TAL20Xam668
Manes.08G143800.1.v7.0;pacid=41313764	26	+	0.351941	TATCCAAGAGGCCCGCCGATT	7.78097e-06	NI-NG-NI-NN-NI-HD-NS-NS-NN-NG-HD-NS-HD-NN-HD-HD-HD-NI-NG-NG	TAL20Xam668
Manes.10G128600.1.v7.0;pacid=41320882	348	+	0.351923	TATAGGAAAGAAGCACCAATT	7.78691e-06	NI-NG-NI-NN-NI-HD-NS-NS-NN-NG-HD-NS-HD-NN-HD-HD-HD-NI-NG-NG	TAL20Xam668
Manes.16G009800.2.v7.0;pacid=41318644	9	+	0.351688	TATATTAAAATCAAGCCAATT	7.86473e-06	NI-NG-NI-NN-NI-HD-NS-NS-NN-NG-HD-NS-HD-NN-HD-HD-HD-NI-NG-NG	TAL20Xam668
Manes.14G048500.1.v7.0;pacid=41330921	53	+	0.351674	TTTTCAAATTTCTCGCCCATT	7.86956e-06	NI-NG-NI-NN-NI-HD-NS-NS-NN-NG-HD-NS-HD-NN-HD-HD-HD-NI-NG-NG	TAL20Xam668
Manes.14G134600.1.v7.0;pacid=41332628	155	-	0.351384	AATACACCAGTAACGCCCACA	7.967e-06	NI-NG-NI-NN-NI-HD-NS-NS-NN-NG-HD-NS-HD-NN-HD-HD-HD-NI-NG-NG	TAL20Xam668
Manes.07G063800.1.v7.0;pacid=41328414	40	-	0.351179	TCAAGACCAATCAAACCAATT	8.03655e-06	NI-NG-NI-NN-NI-HD-NS-NS-NN-NG-HD-NS-HD-NN-HD-HD-HD-NI-NG-NG	TAL20Xam668
Manes.03G176100.1.v7.0;pacid=41307265	246	+	0.351148	TCTAAACAAATCAAACCAACT	8.04718e-06	NI-NG-NI-NN-NI-HD-NS-NS-NN-NG-HD-NS-HD-NN-HD-HD-HD-NI-NG-NG	TAL20Xam668
Manes.03G074800.1.v7.0;pacid=41309130	145	+	0.351088	AAAAAAACCGTCTCGCCCATC	8.06757e-06	NI-NG-NI-NN-NI-HD-NS-NS-NN-NG-HD-NS-HD-NN-HD-HD-HD-NI-NG-NG	TAL20Xam668
Manes.02G079300.1.v7.0;pacid=41340849	224	-	0.350899	AATAGACGGATTGAGCCGATT	8.13249e-06	NI-NG-NI-NN-NI-HD-NS-NS-NN-NG-HD-NS-HD-NN-HD-HD-HD-NI-NG-NG	TAL20Xam668
Manes.01G107300.1.v7.0;pacid=41327022	277	-	0.35078	TATCCACCACGCGCGCCCATG	8.17381e-06	NI-NG-NI-NN-NI-HD-NS-NS-NN-NG-HD-NS-HD-NN-HD-HD-HD-NI-NG-NG	TAL20Xam668
Manes.15G082400.1.v7.0;pacid=41306008	11	+	0.350763	TATTCACGCATATCTCCCACT	8.17976e-06	NI-NG-NI-NN-NI-HD-NS-NS-NN-NG-HD-NS-HD-NN-HD-HD-HD-NI-NG-NG	TAL20Xam668
Manes.03G032700.1.v7.0;pacid=41308949	175	+	0.350752	TACAAACGGCGCAAGCCCATC	8.1834e-06	NI-NG-NI-NN-NI-HD-NS-NS-NN-NG-HD-NS-HD-NN-HD-HD-HD-NI-NG-NG	TAL20Xam668
Manes.03G032700.2.v7.0;pacid=41308950	175	+	0.350752	TACAAACGGCGCAAGCCCATC	8.1834e-06	NI-NG-NI-NN-NI-HD-NS-NS-NN-NG-HD-NS-HD-NN-HD-HD-HD-NI-NG-NG	TAL20Xam668
Manes.16G106900.1.v7.0;pacid=41319761	129	+	0.35062	TATTTACATGTCCTACCCATG	8.22926e-06	NI-NG-NI-NN-NI-HD-NS-NS-NN-NG-HD-NS-HD-NN-HD-HD-HD-NI-NG-NG	TAL20Xam668
Manes.13G060200.1.v7.0;pacid=41338995	148	+	0.35058	CATAAACAATTCTCTCCAATA	8.24344e-06	NI-NG-NI-NN-NI-HD-NS-NS-NN-NG-HD-NS-HD-NN-HD-HD-HD-NI-NG-NG	TAL20Xam668
Manes.13G008900.1.v7.0;pacid=41337358	18	-	0.350355	TCTAGACCAGTACCTACGATT	8.32213e-06	NI-NG-NI-NN-NI-HD-NS-NS-NN-NG-HD-NS-HD-NN-HD-HD-HD-NI-NG-NG	TAL20Xam668
Manes.09G064100.1.v7.0;pacid=41311475	100	+	0.350244	AATTGACATGTCACATACATT	8.36155e-06	NI-NG-NI-NN-NI-HD-NS-NS-NN-NG-HD-NS-HD-NN-HD-HD-HD-NI-NG-NG	TAL20Xam668
Manes.09G064100.3.v7.0;pacid=41311476	100	+	0.350244	AATTGACATGTCACATACATT	8.36155e-06	NI-NG-NI-NN-NI-HD-NS-NS-NN-NG-HD-NS-HD-NN-HD-HD-HD-NI-NG-NG	TAL20Xam668
Manes.06G103300.1.v7.0;pacid=41303937	261	+	0.350172	AATACACGAGTGTCGCCCTTT	8.38694e-06	NI-NG-NI-NN-NI-HD-NS-NS-NN-NG-HD-NS-HD-NN-HD-HD-HD-NI-NG-NG	TAL20Xam668
Manes.11G036500.1.v7.0;pacid=41317230	180	-	0.349986	TATATACAAATCCCAAATATT	8.45341e-06	NI-NG-NI-NN-NI-HD-NS-NS-NN-NG-HD-NS-HD-NN-HD-HD-HD-NI-NG-NG	TAL20Xam668
Manes.03G210000.1.v7.0;pacid=41308608	91	+	0.349939	TTTAGGAATATCTAACCCATT	8.47e-06	NI-NG-NI-NN-NI-HD-NS-NS-NN-NG-HD-NS-HD-NN-HD-HD-HD-NI-NG-NG	TAL20Xam668
Manes.12G093100.1.v7.0;pacid=41323016	222	-	0.349857	TATTGAAGAATCACCAACATT	8.49952e-06	NI-NG-NI-NN-NI-HD-NS-NS-NN-NG-HD-NS-HD-NN-HD-HD-HD-NI-NG-NG	TAL20Xam668
Manes.06G161700.1.v7.0;pacid=41304550	136	+	0.349617	TATTGACATGTCGCCGGCATT	8.58648e-06	NI-NG-NI-NN-NI-HD-NS-NS-NN-NG-HD-NS-HD-NN-HD-HD-HD-NI-NG-NG	TAL20Xam668
Manes.06G161700.2.v7.0;pacid=41304551	136	+	0.349617	TATTGACATGTCGCCGGCATT	8.58648e-06	NI-NG-NI-NN-NI-HD-NS-NS-NN-NG-HD-NS-HD-NN-HD-HD-HD-NI-NG-NG	TAL20Xam668
Manes.09G094000.1.v7.0;pacid=41306195	150	+	0.349567	CAAAAACTGTTCTCATCCATT	8.60433e-06	NI-NG-NI-NN-NI-HD-NS-NS-NN-NG-HD-NS-HD-NN-HD-HD-HD-NI-NG-NG	TAL20Xam668
Manes.18G015300.1.v7.0;pacid=41334322	128	+	0.349409	TATAAAAGCCTCCCTCCCCTG	8.662e-06	NI-NG-NI-NN-NI-HD-NS-NS-NN-NG-HD-NS-HD-NN-HD-HD-HD-NI-NG-NG	TAL20Xam668
Manes.10G045400.1.v7.0;pacid=41322052	288	+	0.349216	TATGGACAGACCAATCACATT	8.73304e-06	NI-NG-NI-NN-NI-HD-NS-NS-NN-NG-HD-NS-HD-NN-HD-HD-HD-NI-NG-NG	TAL20Xam668
Manes.03G081400.1.v7.0;pacid=41307519	116	+	0.349037	AATATACCCCTCACGCCCAAA	8.79934e-06	NI-NG-NI-NN-NI-HD-NS-NS-NN-NG-HD-NS-HD-NN-HD-HD-HD-NI-NG-NG	TAL20Xam668
Manes.12G051100.1.v7.0;pacid=41322479	121	-	0.349014	TAAAAATGGGTCAAACACATT	8.80796e-06	NI-NG-NI-NN-NI-HD-NS-NS-NN-NG-HD-NS-HD-NN-HD-HD-HD-NI-NG-NG	TAL20Xam668
Manes.09G022600.1.v7.0;pacid=41312012	109	+	0.348977	TATAAAAAACTCAAGCCCTGT	8.82155e-06	NI-NG-NI-NN-NI-HD-NS-NS-NN-NG-HD-NS-HD-NN-HD-HD-HD-NI-NG-NG	TAL20Xam668
Manes.09G022700.1.v7.0;pacid=41311882	109	+	0.348977	TATAAAAAACTCAAGCCCTGT	8.82155e-06	NI-NG-NI-NN-NI-HD-NS-NS-NN-NG-HD-NS-HD-NN-HD-HD-HD-NI-NG-NG	TAL20Xam668
Manes.09G119700.1.v7.0;pacid=41311821	413	-	0.34895	TAAAGACTTCTCCCACCCAGC	8.83197e-06	NI-NG-NI-NN-NI-HD-NS-NS-NN-NG-HD-NS-HD-NN-HD-HD-HD-NI-NG-NG	TAL20Xam668
Manes.15G181500.1.v7.0;pacid=41304954	260	+	0.34882	TAAAGAAAAGCCTAGCTCATT	8.88045e-06	NI-NG-NI-NN-NI-HD-NS-NS-NN-NG-HD-NS-HD-NN-HD-HD-HD-NI-NG-NG	TAL20Xam668
Manes.06G060400.1.v7.0;pacid=41304147	233	+	0.348453	TATAAACAAATCAAACACAAC	9.01916e-06	NI-NG-NI-NN-NI-HD-NS-NS-NN-NG-HD-NS-HD-NN-HD-HD-HD-NI-NG-NG	TAL20Xam668
Manes.10G062200.1.v7.0;pacid=41320942	123	+	0.348407	TATAGACTGCTTTTACTCATT	9.03671e-06	NI-NG-NI-NN-NI-HD-NS-NS-NN-NG-HD-NS-HD-NN-HD-HD-HD-NI-NG-NG	TAL20Xam668
Manes.05G141000.1.v7.0;pacid=41335149	46	+	0.348312	TAAAAAAACCTCGAGCTCATT	9.07283e-06	NI-NG-NI-NN-NI-HD-NS-NS-NN-NG-HD-NS-HD-NN-HD-HD-HD-NI-NG-NG	TAL20Xam668
Manes.16G074400.1.v7.0;pacid=41319766	158	-	0.3482	TTTGTACTAGTTTCGCCCATT	9.1157e-06	NI-NG-NI-NN-NI-HD-NS-NS-NN-NG-HD-NS-HD-NN-HD-HD-HD-NI-NG-NG	TAL20Xam668
Manes.06G069500.1.v7.0;pacid=41302814	230	+	0.347948	TATGTATACGTACAGCCCATT	9.21321e-06	NI-NG-NI-NN-NI-HD-NS-NS-NN-NG-HD-NS-HD-NN-HD-HD-HD-NI-NG-NG	TAL20Xam668
Manes.04G094600.1.v7.0;pacid=41315381	100	-	0.347935	TACAGATTTGTCCCTTCCATT	9.21836e-06	NI-NG-NI-NN-NI-HD-NS-NS-NN-NG-HD-NS-HD-NN-HD-HD-HD-NI-NG-NG	TAL20Xam668
Manes.11G136200.3.v7.0;pacid=41317007	422	+	0.347817	TATAAACTTGTTGCCCACATG	9.26414e-06	NI-NG-NI-NN-NI-HD-NS-NS-NN-NG-HD-NS-HD-NN-HD-HD-HD-NI-NG-NG	TAL20Xam668
Manes.11G136200.4.v7.0;pacid=41317008	421	+	0.347817	TATAAACTTGTTGCCCACATG	9.26414e-06	NI-NG-NI-NN-NI-HD-NS-NS-NN-NG-HD-NS-HD-NN-HD-HD-HD-NI-NG-NG	TAL20Xam668
Manes.02G126400.1.v7.0;pacid=41341361	364	+	0.347816	TATAAAATGCTCTTCACCATT	9.26444e-06	NI-NG-NI-NN-NI-HD-NS-NS-NN-NG-HD-NS-HD-NN-HD-HD-HD-NI-NG-NG	TAL20Xam668
Manes.08G092700.1.v7.0;pacid=41313025	99	+	0.347694	TATAGACTTCACACTCTCACT	9.31233e-06	NI-NG-NI-NN-NI-HD-NS-NS-NN-NG-HD-NS-HD-NN-HD-HD-HD-NI-NG-NG	TAL20Xam668
Manes.02G012200.1.v7.0;pacid=41340931	221	+	0.347322	TCTAGACAGTTAACACCATTT	9.45944e-06	NI-NG-NI-NN-NI-HD-NS-NS-NN-NG-HD-NS-HD-NN-HD-HD-HD-NI-NG-NG	TAL20Xam668
Manes.06G116400.1.v7.0;pacid=41303754	191	+	0.347232	TGTCCACCAATCGCCCCCCTT	9.49526e-06	NI-NG-NI-NN-NI-HD-NS-NS-NN-NG-HD-NS-HD-NN-HD-HD-HD-NI-NG-NG	TAL20Xam668
Manes.14G125000.1.v7.0;pacid=41332430	241	+	0.346982	TATATACATATCAAACCTGTT	9.59581e-06	NI-NG-NI-NN-NI-HD-NS-NS-NN-NG-HD-NS-HD-NN-HD-HD-HD-NI-NG-NG	TAL20Xam668
Manes.12G072000.1.v7.0;pacid=41323845	257	+	0.346936	TATTTAAGGGTAGCCCCCAAT	9.61428e-06	NI-NG-NI-NN-NI-HD-NS-NS-NN-NG-HD-NS-HD-NN-HD-HD-HD-NI-NG-NG	TAL20Xam668
Manes.18G075300.1.v7.0;pacid=41334116	227	+	0.346726	TATATACATAAAACCCCCATC	9.69944e-06	NI-NG-NI-NN-NI-HD-NS-NS-NN-NG-HD-NS-HD-NN-HD-HD-HD-NI-NG-NG	TAL20Xam668
Manes.08G087400.1.v7.0;pacid=41313965	56	+	0.346706	TAAAAACAAGTCCCACAAAAT	9.70751e-06	NI-NG-NI-NN-NI-HD-NS-NS-NN-NG-HD-NS-HD-NN-HD-HD-HD-NI-NG-NG	TAL20Xam668
Manes.12G073900.1.v7.0;pacid=41323364	266	-	0.3467	TAATGACATCTAACGCACATT	9.71002e-06	NI-NG-NI-NN-NI-HD-NS-NS-NN-NG-HD-NS-HD-NN-HD-HD-HD-NI-NG-NG	TAL20Xam668
Manes.01G189600.1.v7.0;pacid=41327178	204	-	0.346642	TATACACGTGTTTCTACAATT	9.73368e-06	NI-NG-NI-NN-NI-HD-NS-NS-NN-NG-HD-NS-HD-NN-HD-HD-HD-NI-NG-NG	TAL20Xam668
Manes.12G076700.1.v7.0;pacid=41322855	211	+	0.3466	TAAAGATTTGTAATACCCATT	9.75096e-06	NI-NG-NI-NN-NI-HD-NS-NS-NN-NG-HD-NS-HD-NN-HD-HD-HD-NI-NG-NG	TAL20Xam668
Manes.03G077300.1.v7.0;pacid=41307589	221	+	0.346538	TTTAAACCCACCCCACCGATT	9.77661e-06	NI-NG-NI-NN-NI-HD-NS-NS-NN-NG-HD-NS-HD-NN-HD-HD-HD-NI-NG-NG	TAL20Xam668
Manes.03G077300.2.v7.0;pacid=41307590	221	+	0.346538	TTTAAACCCACCCCACCGATT	9.77661e-06	NI-NG-NI-NN-NI-HD-NS-NS-NN-NG-HD-NS-HD-NN-HD-HD-HD-NI-NG-NG	TAL20Xam668
Manes.08G001300.1.v7.0;pacid=41313793	364	+	0.346504	TATCATCTCATCACTCCCAAT	9.7905e-06	NI-NG-NI-NN-NI-HD-NS-NS-NN-NG-HD-NS-HD-NN-HD-HD-HD-NI-NG-NG	TAL20Xam668
Manes.13G151300.1.v7.0;pacid=41338553	189	-	0.346401	TATGGGCGGGTCATATCCATT	9.83283e-06	NI-NG-NI-NN-NI-HD-NS-NS-NN-NG-HD-NS-HD-NN-HD-HD-HD-NI-NG-NG	TAL20Xam668
Manes.18G097500.1.v7.0;pacid=41333918	191	+	0.346335	TATAACACAAGCAAACCCATT	9.86015e-06	NI-NG-NI-NN-NI-HD-NS-NS-NN-NG-HD-NS-HD-NN-HD-HD-HD-NI-NG-NG	TAL20Xam668
Manes.07G089400.2.v7.0;pacid=41328423	5	-	0.346267	TATAAACTCGTTTATCACATT	9.88833e-06	NI-NG-NI-NN-NI-HD-NS-NS-NN-NG-HD-NS-HD-NN-HD-HD-HD-NI-NG-NG	TAL20Xam668
Manes.06G001500.1.v7.0;pacid=41302714	223	+	0.346252	TATCAAACAGACACTCCCATC	9.89448e-06	NI-NG-NI-NN-NI-HD-NS-NS-NN-NG-HD-NS-HD-NN-HD-HD-HD-NI-NG-NG	TAL20Xam668
Manes.07G094700.1.v7.0;pacid=41328556	106	+	0.346208	TATAAACAGTACTACCACATT	9.91309e-06	NI-NG-NI-NN-NI-HD-NS-NS-NN-NG-HD-NS-HD-NN-HD-HD-HD-NI-NG-NG	TAL20Xam668
Manes.16G110600.1.v7.0;pacid=41319303	0	-	0.346176	TATAAACGCCAAAAGCCCATA	9.9264e-06	NI-NG-NI-NN-NI-HD-NS-NS-NN-NG-HD-NS-HD-NN-HD-HD-HD-NI-NG-NG	TAL20Xam668
Manes.01G271000.1.v7.0;pacid=41324506	194	-	0.346136	TATTGACGATTCACGATCAAT	9.94309e-06	NI-NG-NI-NN-NI-HD-NS-NS-NN-NG-HD-NS-HD-NN-HD-HD-HD-NI-NG-NG	TAL20Xam668
Manes.10G091300.1.v7.0;pacid=41322129	199	+	0.346088	TATAAACATCCCACTCCAATC	9.96293e-06	NI-NG-NI-NN-NI-HD-NS-NS-NN-NG-HD-NS-HD-NN-HD-HD-HD-NI-NG-NG	TAL20Xam668
Manes.S100300.1.v7.0;pacid=41334352	273	-	0.346063	TATAAACAAAGCAAGACTATT	9.97362e-06	NI-NG-NI-NN-NI-HD-NS-NS-NN-NG-HD-NS-HD-NN-HD-HD-HD-NI-NG-NG	TAL20Xam668
Manes.01G025900.1.v7.0;pacid=41325699	111	+	0.345832	TATAAACCCAACCCTCCCACC	1.00707e-05	NI-NG-NI-NN-NI-HD-NS-NS-NN-NG-HD-NS-HD-NN-HD-HD-HD-NI-NG-NG	TAL20Xam668
Manes.05G077500.1.v7.0;pacid=41334789	37	+	0.345803	TAAAAACTTGGCACTCTCATT	1.00828e-05	NI-NG-NI-NN-NI-HD-NS-NS-NN-NG-HD-NS-HD-NN-HD-HD-HD-NI-NG-NG	TAL20Xam668
Manes.05G077500.3.v7.0;pacid=41334790	37	+	0.345803	TAAAAACTTGGCACTCTCATT	1.00828e-05	NI-NG-NI-NN-NI-HD-NS-NS-NN-NG-HD-NS-HD-NN-HD-HD-HD-NI-NG-NG	TAL20Xam668
Manes.05G077500.2.v7.0;pacid=41334791	37	+	0.345803	TAAAAACTTGGCACTCTCATT	1.00828e-05	NI-NG-NI-NN-NI-HD-NS-NS-NN-NG-HD-NS-HD-NN-HD-HD-HD-NI-NG-NG	TAL20Xam668
Manes.10G008400.1.v7.0;pacid=41321408	124	-	0.345799	TTTCGACCCGTCTAACCCAGT	1.00847e-05	NI-NG-NI-NN-NI-HD-NS-NS-NN-NG-HD-NS-HD-NN-HD-HD-HD-NI-NG-NG	TAL20Xam668
Manes.06G017300.1.v7.0;pacid=41304618	217	+	0.345741	CATATTTAGTTCCCACCCATT	1.01092e-05	NI-NG-NI-NN-NI-HD-NS-NS-NN-NG-HD-NS-HD-NN-HD-HD-HD-NI-NG-NG	TAL20Xam668
Manes.18G007900.1.v7.0;pacid=41333066	170	+	0.345646	CATATACACGCCACGTTCATT	1.01497e-05	NI-NG-NI-NN-NI-HD-NS-NS-NN-NG-HD-NS-HD-NN-HD-HD-HD-NI-NG-NG	TAL20Xam668
Manes.11G156200.1.v7.0;pacid=41316814	281	+	0.345382	CACATACAAATCACAGCCATT	1.02626e-05	NI-NG-NI-NN-NI-HD-NS-NS-NN-NG-HD-NS-HD-NN-HD-HD-HD-NI-NG-NG	TAL20Xam668
Manes.01G260500.1.v7.0;pacid=41325866	255	+	0.345273	TATATTCACGTTTCACGCATT	1.03098e-05	NI-NG-NI-NN-NI-HD-NS-NS-NN-NG-HD-NS-HD-NN-HD-HD-HD-NI-NG-NG	TAL20Xam668
Manes.16G034600.1.v7.0;pacid=41330876	152	-	0.344897	TATTGACAAGAAGCAACCCTT	1.04734e-05	NI-NG-NI-NN-NI-HD-NS-NS-NN-NG-HD-NS-HD-NN-HD-HD-HD-NI-NG-NG	TAL20Xam668
Manes.18G137200.1.v7.0;pacid=41333138	251	+	0.344866	TATAAAAGGTTCAAAAGCATT	1.04871e-05	NI-NG-NI-NN-NI-HD-NS-NS-NN-NG-HD-NS-HD-NN-HD-HD-HD-NI-NG-NG	TAL20Xam668
Manes.14G126100.1.v7.0;pacid=41331792	451	+	0.344864	TAAAAACTCATCACTCACATC	1.04877e-05	NI-NG-NI-NN-NI-HD-NS-NS-NN-NG-HD-NS-HD-NN-HD-HD-HD-NI-NG-NG	TAL20Xam668
Manes.14G140300.1.v7.0;pacid=41332512	22	-	0.344683	TATAATAGAGTAGCTCTCATT	1.05677e-05	NI-NG-NI-NN-NI-HD-NS-NS-NN-NG-HD-NS-HD-NN-HD-HD-HD-NI-NG-NG	TAL20Xam668
Manes.01G191500.1.v7.0;pacid=41327197	86	-	0.344516	TGAAGAAAGCTCACACCCATC	1.06418e-05	NI-NG-NI-NN-NI-HD-NS-NS-NN-NG-HD-NS-HD-NN-HD-HD-HD-NI-NG-NG	TAL20Xam668
Manes.04G055800.1.v7.0;pacid=41314660	197	-	0.344369	CATAGACAACACACCACAATT	1.07076e-05	NI-NG-NI-NN-NI-HD-NS-NS-NN-NG-HD-NS-HD-NN-HD-HD-HD-NI-NG-NG	TAL20Xam668
Manes.08G040400.1.v7.0;pacid=41314300	62	+	0.344352	TATATATATACCTAACCCATT	1.07151e-05	NI-NG-NI-NN-NI-HD-NS-NS-NN-NG-HD-NS-HD-NN-HD-HD-HD-NI-NG-NG	TAL20Xam668
Manes.06G116400.1.v7.0;pacid=41303754	331	+	0.344316	TTTAAAATCATCACTCCCTTT	1.07312e-05	NI-NG-NI-NN-NI-HD-NS-NS-NN-NG-HD-NS-HD-NN-HD-HD-HD-NI-NG-NG	TAL20Xam668
Manes.02G167200.1.v7.0;pacid=41340157	167	+	0.344265	TATACATAGATCAAGCACACT	1.07543e-05	NI-NG-NI-NN-NI-HD-NS-NS-NN-NG-HD-NS-HD-NN-HD-HD-HD-NI-NG-NG	TAL20Xam668
Manes.18G009700.1.v7.0;pacid=41334010	191	+	0.344191	TATCAACAAGTCTTGCCATTT	1.07876e-05	NI-NG-NI-NN-NI-HD-NS-NS-NN-NG-HD-NS-HD-NN-HD-HD-HD-NI-NG-NG	TAL20Xam668
Manes.14G037300.1.v7.0;pacid=41332078	134	-	0.344166	TAGAAATGAGCCTAGCCCATT	1.07989e-05	NI-NG-NI-NN-NI-HD-NS-NS-NN-NG-HD-NS-HD-NN-HD-HD-HD-NI-NG-NG	TAL20Xam668
Manes.09G185600.1.v7.0;pacid=41311815	231	+	0.344039	TATAAAAAGCTCATAACCATC	1.08563e-05	NI-NG-NI-NN-NI-HD-NS-NS-NN-NG-HD-NS-HD-NN-HD-HD-HD-NI-NG-NG	TAL20Xam668
Manes.11G120100.1.v7.0;pacid=41317413	279	+	0.343926	TCTAGACAAATCAAGATCATC	1.09076e-05	NI-NG-NI-NN-NI-HD-NS-NS-NN-NG-HD-NS-HD-NN-HD-HD-HD-NI-NG-NG	TAL20Xam668
Manes.14G127100.1.v7.0;pacid=41332326	234	+	0.343857	TATAAACCAATCTCTCAAAAT	1.09392e-05	NI-NG-NI-NN-NI-HD-NS-NS-NN-NG-HD-NS-HD-NN-HD-HD-HD-NI-NG-NG	TAL20Xam668
Manes.15G024700.1.v7.0;pacid=41306989	67	+	0.343822	GAGAGACAGCTCCCATCCATT	1.09553e-05	NI-NG-NI-NN-NI-HD-NS-NS-NN-NG-HD-NS-HD-NN-HD-HD-HD-NI-NG-NG	TAL20Xam668
Manes.01G234600.1.v7.0;pacid=41327423	150	+	0.343725	CAGAATCATGTCTCGCCCGTT	1.1e-05	NI-NG-NI-NN-NI-HD-NS-NS-NN-NG-HD-NS-HD-NN-HD-HD-HD-NI-NG-NG	TAL20Xam668
Manes.17G068900.1.v7.0;pacid=41330740	95	+	0.343672	TATGCACTAATAGCCTCCATT	1.10241e-05	NI-NG-NI-NN-NI-HD-NS-NS-NN-NG-HD-NS-HD-NN-HD-HD-HD-NI-NG-NG	TAL20Xam668
Manes.03G087100.1.v7.0;pacid=41307926	252	+	0.34335	TATTAATTTTTAGCACCCATT	1.11734e-05	NI-NG-NI-NN-NI-HD-NS-NS-NN-NG-HD-NS-HD-NN-HD-HD-HD-NI-NG-NG	TAL20Xam668
Manes.01G249100.1.v7.0;pacid=41325842	190	+	0.343226	TCTCATCACGCCTCACCCATT	1.12314e-05	NI-NG-NI-NN-NI-HD-NS-NS-NN-NG-HD-NS-HD-NN-HD-HD-HD-NI-NG-NG	TAL20Xam668
Manes.07G122200.1.v7.0;pacid=41328728	223	-	0.343216	AACCTACATCTCACGCCCATT	1.12364e-05	NI-NG-NI-NN-NI-HD-NS-NS-NN-NG-HD-NS-HD-NN-HD-HD-HD-NI-NG-NG	TAL20Xam668
Manes.18G027600.1.v7.0;pacid=41332955	155	-	0.343124	TATGAACAACACCCACCCTTT	1.12794e-05	NI-NG-NI-NN-NI-HD-NS-NS-NN-NG-HD-NS-HD-NN-HD-HD-HD-NI-NG-NG	TAL20Xam668
Manes.09G149100.1.v7.0;pacid=41311053	315	+	0.34289	TACAAACACTTCCCATCCCTT	1.13901e-05	NI-NG-NI-NN-NI-HD-NS-NS-NN-NG-HD-NS-HD-NN-HD-HD-HD-NI-NG-NG	TAL20Xam668
Manes.03G035600.1.v7.0;pacid=41304896	247	-	0.342816	TTAAGAAGGCTCCTGCCCATT	1.14254e-05	NI-NG-NI-NN-NI-HD-NS-NS-NN-NG-HD-NS-HD-NN-HD-HD-HD-NI-NG-NG	TAL20Xam668
Manes.09G178400.1.v7.0;pacid=41311918	98	-	0.342777	TACAAAAAAGTCCCTACAATT	1.14438e-05	NI-NG-NI-NN-NI-HD-NS-NS-NN-NG-HD-NS-HD-NN-HD-HD-HD-NI-NG-NG	TAL20Xam668
Manes.15G013100.1.v7.0;pacid=41307127	160	+	0.342684	TATCCACGACTCTCTCCCCTC	1.14884e-05	NI-NG-NI-NN-NI-HD-NS-NS-NN-NG-HD-NS-HD-NN-HD-HD-HD-NI-NG-NG	TAL20Xam668
Manes.01G139600.1.v7.0;pacid=41325652	157	-	0.342523	TATATATTAATCACAAACATT	1.15657e-05	NI-NG-NI-NN-NI-HD-NS-NS-NN-NG-HD-NS-HD-NN-HD-HD-HD-NI-NG-NG	TAL20Xam668
Manes.03G149400.1.v7.0;pacid=41309802	103	+	0.342463	TAAATTCGACTCACACGCATT	1.1595e-05	NI-NG-NI-NN-NI-HD-NS-NS-NN-NG-HD-NS-HD-NN-HD-HD-HD-NI-NG-NG	TAL20Xam668
Manes.01G149500.1.v7.0;pacid=41325956	108	-	0.342428	TATAGATGGATCACAACGACT	1.16117e-05	NI-NG-NI-NN-NI-HD-NS-NS-NN-NG-HD-NS-HD-NN-HD-HD-HD-NI-NG-NG	TAL20Xam668
Manes.13G013600.1.v7.0;pacid=41339052	68	-	0.34242	CATAGAGCAATCAAGCACATT	1.16153e-05	NI-NG-NI-NN-NI-HD-NS-NS-NN-NG-HD-NS-HD-NN-HD-HD-HD-NI-NG-NG	TAL20Xam668
Manes.11G043700.1.v7.0;pacid=41318455	45	-	0.342297	CATAAAAGGGTCTCTCCCCGT	1.16752e-05	NI-NG-NI-NN-NI-HD-NS-NS-NN-NG-HD-NS-HD-NN-HD-HD-HD-NI-NG-NG	TAL20Xam668
Manes.15G080400.1.v7.0;pacid=41306392	224	-	0.34224	TATGGGCCAGAAAAGCCCATT	1.17032e-05	NI-NG-NI-NN-NI-HD-NS-NS-NN-NG-HD-NS-HD-NN-HD-HD-HD-NI-NG-NG	TAL20Xam668
Manes.01G265200.1.v7.0;pacid=41325753	108	+	0.342099	CATACACCAGACAACCCCATG	1.17718e-05	NI-NG-NI-NN-NI-HD-NS-NS-NN-NG-HD-NS-HD-NN-HD-HD-HD-NI-NG-NG	TAL20Xam668
Manes.S084000.1.v7.0;pacid=41327847	182	+	0.342027	TATAACCAAGTCACATACTTT	1.18072e-05	NI-NG-NI-NN-NI-HD-NS-NS-NN-NG-HD-NS-HD-NN-HD-HD-HD-NI-NG-NG	TAL20Xam668
Manes.S111400.1.v7.0;pacid=41327900	182	+	0.342027	TATAACCAAGTCACATACTTT	1.18072e-05	NI-NG-NI-NN-NI-HD-NS-NS-NN-NG-HD-NS-HD-NN-HD-HD-HD-NI-NG-NG	TAL20Xam668
Manes.09G068100.2.v7.0;pacid=41311764	27	+	0.341959	TTTAAACTTGCTCCCCCCATT	1.1841e-05	NI-NG-NI-NN-NI-HD-NS-NS-NN-NG-HD-NS-HD-NN-HD-HD-HD-NI-NG-NG	TAL20Xam668
Manes.17G042000.1.v7.0;pacid=41330697	178	+	0.34183	TAAATACCCACCAACCCCATT	1.19047e-05	NI-NG-NI-NN-NI-HD-NS-NS-NN-NG-HD-NS-HD-NN-HD-HD-HD-NI-NG-NG	TAL20Xam668
Manes.02G054700.1.v7.0;pacid=41340516	332	+	0.341648	GATAGAAAGGTCTCACCCGAT	1.19954e-05	NI-NG-NI-NN-NI-HD-NS-NS-NN-NG-HD-NS-HD-NN-HD-HD-HD-NI-NG-NG	TAL20Xam668
Manes.02G054700.2.v7.0;pacid=41340517	332	+	0.341648	GATAGAAAGGTCTCACCCGAT	1.19954e-05	NI-NG-NI-NN-NI-HD-NS-NS-NN-NG-HD-NS-HD-NN-HD-HD-HD-NI-NG-NG	TAL20Xam668
Manes.15G082500.1.v7.0;pacid=41305953	269	-	0.341547	CAGAACCTCGTCTCGCCCCTT	1.20459e-05	NI-NG-NI-NN-NI-HD-NS-NS-NN-NG-HD-NS-HD-NN-HD-HD-HD-NI-NG-NG	TAL20Xam668
Manes.S075500.1.v7.0;pacid=41320550	111	+	0.341341	TTTTGACTGTTCGAGTCCATT	1.21494e-05	NI-NG-NI-NN-NI-HD-NS-NS-NN-NG-HD-NS-HD-NN-HD-HD-HD-NI-NG-NG	TAL20Xam668
Manes.S075500.3.v7.0;pacid=41320551	111	+	0.341341	TTTTGACTGTTCGAGTCCATT	1.21494e-05	NI-NG-NI-NN-NI-HD-NS-NS-NN-NG-HD-NS-HD-NN-HD-HD-HD-NI-NG-NG	TAL20Xam668
Manes.S075500.2.v7.0;pacid=41320552	111	+	0.341341	TTTTGACTGTTCGAGTCCATT	1.21494e-05	NI-NG-NI-NN-NI-HD-NS-NS-NN-NG-HD-NS-HD-NN-HD-HD-HD-NI-NG-NG	TAL20Xam668
Manes.03G191600.1.v7.0;pacid=41307971	96	-	0.341297	TATATCCAAATCAATCCCTTT	1.21715e-05	NI-NG-NI-NN-NI-HD-NS-NS-NN-NG-HD-NS-HD-NN-HD-HD-HD-NI-NG-NG	TAL20Xam668
Manes.08G161800.1.v7.0;pacid=41313586	145	+	0.341248	CATAGCCCTCTCACACCCTTA	1.21964e-05	NI-NG-NI-NN-NI-HD-NS-NS-NN-NG-HD-NS-HD-NN-HD-HD-HD-NI-NG-NG	TAL20Xam668
Manes.01G015200.1.v7.0;pacid=41326235	112	-	0.341132	TCTAGACCTGTCTCAGGCATT	1.22556e-05	NI-NG-NI-NN-NI-HD-NS-NS-NN-NG-HD-NS-HD-NN-HD-HD-HD-NI-NG-NG	TAL20Xam668
Manes.09G098900.1.v7.0;pacid=41310929	108	+	0.341126	TATATACTGAACCCACTCATC	1.22583e-05	NI-NG-NI-NN-NI-HD-NS-NS-NN-NG-HD-NS-HD-NN-HD-HD-HD-NI-NG-NG	TAL20Xam668
Manes.12G057400.1.v7.0;pacid=41322874	165	-	0.341121	TATGGACTCTACTCACCCATA	1.22608e-05	NI-NG-NI-NN-NI-HD-NS-NS-NN-NG-HD-NS-HD-NN-HD-HD-HD-NI-NG-NG	TAL20Xam668
Manes.04G043600.2.v7.0;pacid=41315199	110	-	0.341114	AATAAACAAATAAAACCCAAT	1.22645e-05	NI-NG-NI-NN-NI-HD-NS-NS-NN-NG-HD-NS-HD-NN-HD-HD-HD-NI-NG-NG	TAL20Xam668
Manes.10G078800.1.v7.0;pacid=41321202	193	+	0.340822	CATAAATACATCTCTCCCGTT	1.24145e-05	NI-NG-NI-NN-NI-HD-NS-NS-NN-NG-HD-NS-HD-NN-HD-HD-HD-NI-NG-NG	TAL20Xam668
Manes.15G161100.1.v7.0;pacid=41306685	356	+	0.340815	TATAAAAAAATCATAATCATT	1.24178e-05	NI-NG-NI-NN-NI-HD-NS-NS-NN-NG-HD-NS-HD-NN-HD-HD-HD-NI-NG-NG	TAL20Xam668
Manes.09G165600.1.v7.0;pacid=41310795	182	-	0.340751	TTTCGACCTTTCCATCCCATT	1.24512e-05	NI-NG-NI-NN-NI-HD-NS-NS-NN-NG-HD-NS-HD-NN-HD-HD-HD-NI-NG-NG	TAL20Xam668
Manes.09G165600.2.v7.0;pacid=41310796	182	-	0.340751	TTTCGACCTTTCCATCCCATT	1.24512e-05	NI-NG-NI-NN-NI-HD-NS-NS-NN-NG-HD-NS-HD-NN-HD-HD-HD-NI-NG-NG	TAL20Xam668
Manes.11G000700.1.v7.0;pacid=41318026	135	+	0.340735	AATAAAAACCTCTCTCCAATT	1.24594e-05	NI-NG-NI-NN-NI-HD-NS-NS-NN-NG-HD-NS-HD-NN-HD-HD-HD-NI-NG-NG	TAL20Xam668
Manes.06G080200.1.v7.0;pacid=41303903	49	+	0.340709	TTTACACTTATCACCACCATC	1.24726e-05	NI-NG-NI-NN-NI-HD-NS-NS-NN-NG-HD-NS-HD-NN-HD-HD-HD-NI-NG-NG	TAL20Xam668
Manes.06G080200.2.v7.0;pacid=41303904	49	+	0.340709	TTTACACTTATCACCACCATC	1.24726e-05	NI-NG-NI-NN-NI-HD-NS-NS-NN-NG-HD-NS-HD-NN-HD-HD-HD-NI-NG-NG	TAL20Xam668
Manes.06G080200.3.v7.0;pacid=41303905	49	+	0.340709	TTTACACTTATCACCACCATC	1.24726e-05	NI-NG-NI-NN-NI-HD-NS-NS-NN-NG-HD-NS-HD-NN-HD-HD-HD-NI-NG-NG	TAL20Xam668
Manes.01G098300.1.v7.0;pacid=41324246	128	-	0.340667	TATAAACTGGCCAAACTAATT	1.24943e-05	NI-NG-NI-NN-NI-HD-NS-NS-NN-NG-HD-NS-HD-NN-HD-HD-HD-NI-NG-NG	TAL20Xam668
Manes.11G105400.1.v7.0;pacid=41317021	307	+	0.34055	AATTAAAACCTCCAGCCCATT	1.25556e-05	NI-NG-NI-NN-NI-HD-NS-NS-NN-NG-HD-NS-HD-NN-HD-HD-HD-NI-NG-NG	TAL20Xam668
Manes.01G122800.1.v7.0;pacid=41325437	229	+	0.340471	TCTTCACGCTTAAAGCCCATT	1.25967e-05	NI-NG-NI-NN-NI-HD-NS-NS-NN-NG-HD-NS-HD-NN-HD-HD-HD-NI-NG-NG	TAL20Xam668
Manes.16G069200.1.v7.0;pacid=41319846	114	+	0.340422	AATATCCAAATCGGGCCCATT	1.26224e-05	NI-NG-NI-NN-NI-HD-NS-NS-NN-NG-HD-NS-HD-NN-HD-HD-HD-NI-NG-NG	TAL20Xam668
Manes.02G131300.1.v7.0;pacid=41340351	157	+	0.340373	TATATACACATCTCACCCTCA	1.26481e-05	NI-NG-NI-NN-NI-HD-NS-NS-NN-NG-HD-NS-HD-NN-HD-HD-HD-NI-NG-NG	TAL20Xam668
Manes.17G036600.1.v7.0;pacid=41330313	171	+	0.340371	TATACTCTTATCTAATCCATT	1.26491e-05	NI-NG-NI-NN-NI-HD-NS-NS-NN-NG-HD-NS-HD-NN-HD-HD-HD-NI-NG-NG	TAL20Xam668
Manes.09G020300.1.v7.0;pacid=41312087	223	+	0.340363	TATATAAGGATAGCTACCCTT	1.26532e-05	NI-NG-NI-NN-NI-HD-NS-NS-NN-NG-HD-NS-HD-NN-HD-HD-HD-NI-NG-NG	TAL20Xam668
Manes.03G044600.2.v7.0;pacid=41308784	38	-	0.340266	TATAAACAGGTATATCACAAT	1.2704e-05	NI-NG-NI-NN-NI-HD-NS-NS-NN-NG-HD-NS-HD-NN-HD-HD-HD-NI-NG-NG	TAL20Xam668
Manes.02G164500.1.v7.0;pacid=41340572	211	+	0.340252	AATTTACATCTCACGTCCATT	1.27116e-05	NI-NG-NI-NN-NI-HD-NS-NS-NN-NG-HD-NS-HD-NN-HD-HD-HD-NI-NG-NG	TAL20Xam668
Manes.11G019400.1.v7.0;pacid=41318260	165	+	0.340218	TCTAAACCTTTCAACCCAATT	1.27297e-05	NI-NG-NI-NN-NI-HD-NS-NS-NN-NG-HD-NS-HD-NN-HD-HD-HD-NI-NG-NG	TAL20Xam668
Manes.11G019400.2.v7.0;pacid=41318261	165	+	0.340218	TCTAAACCTTTCAACCCAATT	1.27297e-05	NI-NG-NI-NN-NI-HD-NS-NS-NN-NG-HD-NS-HD-NN-HD-HD-HD-NI-NG-NG	TAL20Xam668
Manes.18G100400.1.v7.0;pacid=41334593	197	-	0.340073	TAGGATAGGGTCCCACCCATT	1.28066e-05	NI-NG-NI-NN-NI-HD-NS-NS-NN-NG-HD-NS-HD-NN-HD-HD-HD-NI-NG-NG	TAL20Xam668
Manes.01G171600.1.v7.0;pacid=41327315	147	+	0.340064	TATATGAATGTCAATACCATT	1.28111e-05	NI-NG-NI-NN-NI-HD-NS-NS-NN-NG-HD-NS-HD-NN-HD-HD-HD-NI-NG-NG	TAL20Xam668
Manes.01G171600.2.v7.0;pacid=41327316	147	+	0.340064	TATATGAATGTCAATACCATT	1.28111e-05	NI-NG-NI-NN-NI-HD-NS-NS-NN-NG-HD-NS-HD-NN-HD-HD-HD-NI-NG-NG	TAL20Xam668
Manes.02G190100.1.v7.0;pacid=41339970	351	-	0.340061	CAAAACCAAATCACACACATT	1.28126e-05	NI-NG-NI-NN-NI-HD-NS-NS-NN-NG-HD-NS-HD-NN-HD-HD-HD-NI-NG-NG	TAL20Xam668
Manes.01G221200.1.v7.0;pacid=41326125	109	-	0.340008	TATGACAGGGTCGAGCCCAAT	1.28409e-05	NI-NG-NI-NN-NI-HD-NS-NS-NN-NG-HD-NS-HD-NN-HD-HD-HD-NI-NG-NG	TAL20Xam668
Manes.12G097500.1.v7.0;pacid=41322596	182	-	0.339873	ATTAGAAAGCTCTAACCCATT	1.2913e-05	NI-NG-NI-NN-NI-HD-NS-NS-NN-NG-HD-NS-HD-NN-HD-HD-HD-NI-NG-NG	TAL20Xam668
Manes.03G005400.1.v7.0;pacid=41308106	372	+	0.339762	CATTCACGAGTCAAAACAATT	1.29728e-05	NI-NG-NI-NN-NI-HD-NS-NS-NN-NG-HD-NS-HD-NN-HD-HD-HD-NI-NG-NG	TAL20Xam668
Manes.06G050600.1.v7.0;pacid=41302915	221	-	0.339725	TATATATGTGTCGCTCCAACT	1.29927e-05	NI-NG-NI-NN-NI-HD-NS-NS-NN-NG-HD-NS-HD-NN-HD-HD-HD-NI-NG-NG	TAL20Xam668
Manes.06G050600.2.v7.0;pacid=41302916	221	-	0.339725	TATATATGTGTCGCTCCAACT	1.29927e-05	NI-NG-NI-NN-NI-HD-NS-NS-NN-NG-HD-NS-HD-NN-HD-HD-HD-NI-NG-NG	TAL20Xam668
Manes.18G118800.1.v7.0;pacid=41333516	223	+	0.339407	TATATAACAATCTCTCACACT	1.31649e-05	NI-NG-NI-NN-NI-HD-NS-NS-NN-NG-HD-NS-HD-NN-HD-HD-HD-NI-NG-NG	TAL20Xam668
Manes.01G226400.1.v7.0;pacid=41327198	325	+	0.339357	AATAAATACGTCTCTCCGATT	1.31921e-05	NI-NG-NI-NN-NI-HD-NS-NS-NN-NG-HD-NS-HD-NN-HD-HD-HD-NI-NG-NG	TAL20Xam668
Manes.01G226400.2.v7.0;pacid=41327199	325	+	0.339357	AATAAATACGTCTCTCCGATT	1.31921e-05	NI-NG-NI-NN-NI-HD-NS-NS-NN-NG-HD-NS-HD-NN-HD-HD-HD-NI-NG-NG	TAL20Xam668
Manes.12G001700.1.v7.0;pacid=41322522	102	+	0.339343	TATAGACATATCACTGACCTT	1.31998e-05	NI-NG-NI-NN-NI-HD-NS-NS-NN-NG-HD-NS-HD-NN-HD-HD-HD-NI-NG-NG	TAL20Xam668
Manes.17G104800.1.v7.0;pacid=41329732	49	+	0.339332	TGTGGACGCCTCGAACCCTTT	1.3206e-05	NI-NG-NI-NN-NI-HD-NS-NS-NN-NG-HD-NS-HD-NN-HD-HD-HD-NI-NG-NG	TAL20Xam668
Manes.01G235400.1.v7.0;pacid=41324228	18	+	0.339315	CCTAATCCAATCCCACCCCTT	1.3215e-05	NI-NG-NI-NN-NI-HD-NS-NS-NN-NG-HD-NS-HD-NN-HD-HD-HD-NI-NG-NG	TAL20Xam668
Manes.11G165700.1.v7.0;pacid=41317397	46	+	0.339262	TATACATGTCTCAACCCCATC	1.32444e-05	NI-NG-NI-NN-NI-HD-NS-NS-NN-NG-HD-NS-HD-NN-HD-HD-HD-NI-NG-NG	TAL20Xam668
Manes.14G145700.1.v7.0;pacid=41331561	233	+	0.339249	TACAAACACATCTCTCCTCTT	1.32512e-05	NI-NG-NI-NN-NI-HD-NS-NS-NN-NG-HD-NS-HD-NN-HD-HD-HD-NI-NG-NG	TAL20Xam668
Manes.14G145800.1.v7.0;pacid=41331154	233	+	0.339249	TACAAACACATCTCTCCTCTT	1.32512e-05	NI-NG-NI-NN-NI-HD-NS-NS-NN-NG-HD-NS-HD-NN-HD-HD-HD-NI-NG-NG	TAL20Xam668
Manes.14G043500.1.v7.0;pacid=41331234	2	-	0.339172	TATCCACAAACCCCTCCAATT	1.32935e-05	NI-NG-NI-NN-NI-HD-NS-NS-NN-NG-HD-NS-HD-NN-HD-HD-HD-NI-NG-NG	TAL20Xam668
Manes.05G131400.1.v7.0;pacid=41335141	154	+	0.339062	TATTGACACCTCGCGTTCCTT	1.33546e-05	NI-NG-NI-NN-NI-HD-NS-NS-NN-NG-HD-NS-HD-NN-HD-HD-HD-NI-NG-NG	TAL20Xam668
Manes.02G193100.1.v7.0;pacid=41340621	400	+	0.339053	TATCAACTGGTTCCGCTCATA	1.33594e-05	NI-NG-NI-NN-NI-HD-NS-NS-NN-NG-HD-NS-HD-NN-HD-HD-HD-NI-NG-NG	TAL20Xam668
Manes.17G124300.1.v7.0;pacid=41329880	189	+	0.339046	AAAACACATGGCCAGCCCATT	1.33632e-05	NI-NG-NI-NN-NI-HD-NS-NS-NN-NG-HD-NS-HD-NN-HD-HD-HD-NI-NG-NG	TAL20Xam668
Manes.03G120700.1.v7.0;pacid=41308515	111	+	0.338918	AATTGACAAGTCTAGCCAACT	1.34345e-05	NI-NG-NI-NN-NI-HD-NS-NS-NN-NG-HD-NS-HD-NN-HD-HD-HD-NI-NG-NG	TAL20Xam668
Manes.01G078800.1.v7.0;pacid=41325050	68	+	0.338887	TAGGAACACGTAAAGACCATT	1.34515e-05	NI-NG-NI-NN-NI-HD-NS-NS-NN-NG-HD-NS-HD-NN-HD-HD-HD-NI-NG-NG	TAL20Xam668
Manes.06G139700.1.v7.0;pacid=41303741	271	+	0.338629	CATCTACTCATCCCTCCCAAT	1.35956e-05	NI-NG-NI-NN-NI-HD-NS-NS-NN-NG-HD-NS-HD-NN-HD-HD-HD-NI-NG-NG	TAL20Xam668
Manes.15G086200.1.v7.0;pacid=41305674	167	-	0.338624	CATAGACCAACACAGCCCATA	1.35985e-05	NI-NG-NI-NN-NI-HD-NS-NS-NN-NG-HD-NS-HD-NN-HD-HD-HD-NI-NG-NG	TAL20Xam668
Manes.14G034800.1.v7.0;pacid=41332557	141	-	0.338355	AACAGAAGAGGCCAGCCCATT	1.37506e-05	NI-NG-NI-NN-NI-HD-NS-NS-NN-NG-HD-NS-HD-NN-HD-HD-HD-NI-NG-NG	TAL20Xam668
Manes.03G027000.1.v7.0;pacid=41307550	244	+	0.338213	TACCCACCTGTCGCACCCACC	1.38317e-05	NI-NG-NI-NN-NI-HD-NS-NS-NN-NG-HD-NS-HD-NN-HD-HD-HD-NI-NG-NG	TAL20Xam668
Manes.07G033900.1.v7.0;pacid=41327666	223	+	0.338141	TAAATACCTCCCTCGCCCAAT	1.38728e-05	NI-NG-NI-NN-NI-HD-NS-NS-NN-NG-HD-NS-HD-NN-HD-HD-HD-NI-NG-NG	TAL20Xam668
Manes.11G143600.1.v7.0;pacid=41318593	178	+	0.338045	TATAAACCCCTCGCTCTCCTC	1.39284e-05	NI-NG-NI-NN-NI-HD-NS-NS-NN-NG-HD-NS-HD-NN-HD-HD-HD-NI-NG-NG	TAL20Xam668
Manes.12G100900.1.v7.0;pacid=41322290	124	+	0.338034	TCTAGAACTCTCGCATCCACT	1.39347e-05	NI-NG-NI-NN-NI-HD-NS-NS-NN-NG-HD-NS-HD-NN-HD-HD-HD-NI-NG-NG	TAL20Xam668
Manes.03G020500.1.v7.0;pacid=41308487	185	-	0.337992	TATATAATGGACGCGCTCACT	1.39586e-05	NI-NG-NI-NN-NI-HD-NS-NS-NN-NG-HD-NS-HD-NN-HD-HD-HD-NI-NG-NG	TAL20Xam668
Manes.12G011900.1.v7.0;pacid=41323536	174	+	0.337907	TATAGATCGCTCGCGCGAACT	1.40077e-05	NI-NG-NI-NN-NI-HD-NS-NS-NN-NG-HD-NS-HD-NN-HD-HD-HD-NI-NG-NG	TAL20Xam668
Manes.12G011900.2.v7.0;pacid=41323537	174	+	0.337907	TATAGATCGCTCGCGCGAACT	1.40077e-05	NI-NG-NI-NN-NI-HD-NS-NS-NN-NG-HD-NS-HD-NN-HD-HD-HD-NI-NG-NG	TAL20Xam668
Manes.05G122600.1.v7.0;pacid=41335606	232	+	0.337894	TAAAACCCTAACCCTCCCATT	1.4015e-05	NI-NG-NI-NN-NI-HD-NS-NS-NN-NG-HD-NS-HD-NN-HD-HD-HD-NI-NG-NG	TAL20Xam668
Manes.01G190000.1.v7.0;pacid=41325296	271	+	0.33761	TAAAAAACCGTCCCATCCACT	1.41806e-05	NI-NG-NI-NN-NI-HD-NS-NS-NN-NG-HD-NS-HD-NN-HD-HD-HD-NI-NG-NG	TAL20Xam668
Manes.01G190000.2.v7.0;pacid=41325298	271	+	0.33761	TAAAAAACCGTCCCATCCACT	1.41806e-05	NI-NG-NI-NN-NI-HD-NS-NS-NN-NG-HD-NS-HD-NN-HD-HD-HD-NI-NG-NG	TAL20Xam668
Manes.09G016600.1.v7.0;pacid=41311943	237	+	0.337608	TATAAAACAGTACCCCATATT	1.41816e-05	NI-NG-NI-NN-NI-HD-NS-NS-NN-NG-HD-NS-HD-NN-HD-HD-HD-NI-NG-NG	TAL20Xam668
Manes.15G072900.1.v7.0;pacid=41307113	203	+	0.337589	CATTAACAGGTCACAGCCATA	1.41928e-05	NI-NG-NI-NN-NI-HD-NS-NS-NN-NG-HD-NS-HD-NN-HD-HD-HD-NI-NG-NG	TAL20Xam668
Manes.08G089800.1.v7.0;pacid=41312818	182	+	0.337574	CACTGGCATATCACCCCCATT	1.42015e-05	NI-NG-NI-NN-NI-HD-NS-NS-NN-NG-HD-NS-HD-NN-HD-HD-HD-NI-NG-NG	TAL20Xam668
Manes.05G192600.1.v7.0;pacid=41336240	76	+	0.337512	TATATTCTTCCCACGCTCATT	1.42381e-05	NI-NG-NI-NN-NI-HD-NS-NS-NN-NG-HD-NS-HD-NN-HD-HD-HD-NI-NG-NG	TAL20Xam668
Manes.11G068500.1.v7.0;pacid=41316954	187	+	0.337506	AATTTACACGTCACAACCATC	1.42416e-05	NI-NG-NI-NN-NI-HD-NS-NS-NN-NG-HD-NS-HD-NN-HD-HD-HD-NI-NG-NG	TAL20Xam668
Manes.17G058900.1.v7.0;pacid=41330763	98	-	0.337505	TATAATACCATCTCCCCCCTT	1.42422e-05	NI-NG-NI-NN-NI-HD-NS-NS-NN-NG-HD-NS-HD-NN-HD-HD-HD-NI-NG-NG	TAL20Xam668
Manes.12G097100.1.v7.0;pacid=41322646	48	-	0.33745	TATAGAAAAATCAAGAGCACT	1.42747e-05	NI-NG-NI-NN-NI-HD-NS-NS-NN-NG-HD-NS-HD-NN-HD-HD-HD-NI-NG-NG	TAL20Xam668
Manes.11G044000.1.v7.0;pacid=41317115	116	-	0.337425	TATATACGACACACACACAGT	1.42896e-05	NI-NG-NI-NN-NI-HD-NS-NS-NN-NG-HD-NS-HD-NN-HD-HD-HD-NI-NG-NG	TAL20Xam668
Manes.17G059000.1.v7.0;pacid=41330702	115	+	0.337408	CAGACAGGAGTCTCTCCCATT	1.42992e-05	NI-NG-NI-NN-NI-HD-NS-NS-NN-NG-HD-NS-HD-NN-HD-HD-HD-NI-NG-NG	TAL20Xam668
Manes.14G105600.1.v7.0;pacid=41331577	467	-	0.337259	TAAAACCAGGTAAAGCCAATT	1.43872e-05	NI-NG-NI-NN-NI-HD-NS-NS-NN-NG-HD-NS-HD-NN-HD-HD-HD-NI-NG-NG	TAL20Xam668
Manes.14G105600.2.v7.0;pacid=41331578	467	-	0.337259	TAAAACCAGGTAAAGCCAATT	1.43872e-05	NI-NG-NI-NN-NI-HD-NS-NS-NN-NG-HD-NS-HD-NN-HD-HD-HD-NI-NG-NG	TAL20Xam668
Manes.11G107300.1.v7.0;pacid=41318224	260	+	0.337218	TGTACATGCTTTACGCCCATT	1.44116e-05	NI-NG-NI-NN-NI-HD-NS-NS-NN-NG-HD-NS-HD-NN-HD-HD-HD-NI-NG-NG	TAL20Xam668
Manes.06G071500.1.v7.0;pacid=41304451	239	+	0.337086	TATATATATATCACCACCATC	1.44904e-05	NI-NG-NI-NN-NI-HD-NS-NS-NN-NG-HD-NS-HD-NN-HD-HD-HD-NI-NG-NG	TAL20Xam668
Manes.03G168900.1.v7.0;pacid=41307693	269	-	0.337071	ACTAGACTGGTTACACTCATT	1.44996e-05	NI-NG-NI-NN-NI-HD-NS-NS-NN-NG-HD-NS-HD-NN-HD-HD-HD-NI-NG-NG	TAL20Xam668
Manes.13G144300.1.v7.0;pacid=41338005	142	+	0.337022	AAAAGCCAAATCGCTCCCATC	1.45285e-05	NI-NG-NI-NN-NI-HD-NS-NS-NN-NG-HD-NS-HD-NN-HD-HD-HD-NI-NG-NG	TAL20Xam668
Manes.05G115700.1.v7.0;pacid=41336379	102	-	0.337019	TATTAAATACACAAGCCCATT	1.45307e-05	NI-NG-NI-NN-NI-HD-NS-NS-NN-NG-HD-NS-HD-NN-HD-HD-HD-NI-NG-NG	TAL20Xam668
Manes.05G100100.1.v7.0;pacid=41337013	169	+	0.336911	CACAAACTCAGCAAACCCATT	1.45952e-05	NI-NG-NI-NN-NI-HD-NS-NS-NN-NG-HD-NS-HD-NN-HD-HD-HD-NI-NG-NG	TAL20Xam668
Manes.07G084300.1.v7.0;pacid=41328744	238	+	0.3368	TATAAAATCGGCCCACCCACA	1.46626e-05	NI-NG-NI-NN-NI-HD-NS-NS-NN-NG-HD-NS-HD-NN-HD-HD-HD-NI-NG-NG	TAL20Xam668
Manes.15G063800.1.v7.0;pacid=41305900	283	+	0.336761	TATAAATACATCTCTCCCAAC	1.46858e-05	NI-NG-NI-NN-NI-HD-NS-NS-NN-NG-HD-NS-HD-NN-HD-HD-HD-NI-NG-NG	TAL20Xam668
Manes.04G144800.1.v7.0;pacid=41315423	170	+	0.336686	TATAAAAATTTCACTCTAATT	1.47314e-05	NI-NG-NI-NN-NI-HD-NS-NS-NN-NG-HD-NS-HD-NN-HD-HD-HD-NI-NG-NG	TAL20Xam668
Manes.06G059000.1.v7.0;pacid=41303992	226	-	0.33667	TATAGAAGGGTTAAGCTCAGT	1.47413e-05	NI-NG-NI-NN-NI-HD-NS-NS-NN-NG-HD-NS-HD-NN-HD-HD-HD-NI-NG-NG	TAL20Xam668
Manes.09G061100.1.v7.0;pacid=41310615	162	+	0.336598	TATAAACAAATCAAACGCCTA	1.4785e-05	NI-NG-NI-NN-NI-HD-NS-NS-NN-NG-HD-NS-HD-NN-HD-HD-HD-NI-NG-NG	TAL20Xam668
Manes.15G079400.1.v7.0;pacid=41304934	185	+	0.336561	TCCAGACGAGTCGCACAAATA	1.48073e-05	NI-NG-NI-NN-NI-HD-NS-NS-NN-NG-HD-NS-HD-NN-HD-HD-HD-NI-NG-NG	TAL20Xam668
Manes.02G151600.1.v7.0;pacid=41339882	1	+	0.336534	TTTAACCAACCCAAACCCATT	1.48241e-05	NI-NG-NI-NN-NI-HD-NS-NS-NN-NG-HD-NS-HD-NN-HD-HD-HD-NI-NG-NG	TAL20Xam668
Manes.02G151600.2.v7.0;pacid=41339883	1	+	0.336534	TTTAACCAACCCAAACCCATT	1.48241e-05	NI-NG-NI-NN-NI-HD-NS-NS-NN-NG-HD-NS-HD-NN-HD-HD-HD-NI-NG-NG	TAL20Xam668
Manes.01G006800.1.v7.0;pacid=41326358	118	+	0.33644	TAAAAACCTGTTTCTCCCTTT	1.48815e-05	NI-NG-NI-NN-NI-HD-NS-NS-NN-NG-HD-NS-HD-NN-HD-HD-HD-NI-NG-NG	TAL20Xam668
Manes.10G085000.1.v7.0;pacid=41321837	109	+	0.336355	CATAAATTAGTCCATCCAATT	1.49337e-05	NI-NG-NI-NN-NI-HD-NS-NS-NN-NG-HD-NS-HD-NN-HD-HD-HD-NI-NG-NG	TAL20Xam668
Manes.08G037700.1.v7.0;pacid=41314107	247	+	0.336308	TATATATATACCCCACCCATA	1.49625e-05	NI-NG-NI-NN-NI-HD-NS-NS-NN-NG-HD-NS-HD-NN-HD-HD-HD-NI-NG-NG	TAL20Xam668
Manes.09G032900.1.v7.0;pacid=41310845	173	+	0.336298	TATAGATAAAAATTACCCATT	1.49688e-05	NI-NG-NI-NN-NI-HD-NS-NS-NN-NG-HD-NS-HD-NN-HD-HD-HD-NI-NG-NG	TAL20Xam668
Manes.03G116700.1.v7.0;pacid=41309370	244	+	0.336085	TATAAACTCAACACTTCCCTT	1.51007e-05	NI-NG-NI-NN-NI-HD-NS-NS-NN-NG-HD-NS-HD-NN-HD-HD-HD-NI-NG-NG	TAL20Xam668
Manes.08G007900.1.v7.0;pacid=41314390	207	+	0.336035	TATTGAGAAGTCCCGTACATT	1.51316e-05	NI-NG-NI-NN-NI-HD-NS-NS-NN-NG-HD-NS-HD-NN-HD-HD-HD-NI-NG-NG	TAL20Xam668
Manes.S045100.1.v7.0;pacid=41316538	257	+	0.335974	TCCAGTCACATCCCACTCATT	1.51696e-05	NI-NG-NI-NN-NI-HD-NS-NS-NN-NG-HD-NS-HD-NN-HD-HD-HD-NI-NG-NG	TAL20Xam668
Manes.05G099600.1.v7.0;pacid=41335923	203	+	0.335894	TATAACCCTTTCCATCCCCTT	1.52197e-05	NI-NG-NI-NN-NI-HD-NS-NS-NN-NG-HD-NS-HD-NN-HD-HD-HD-NI-NG-NG	TAL20Xam668
Manes.03G103200.1.v7.0;pacid=41308217	190	+	0.33587	CATAAATAGGTAGCGCCCGCT	1.52345e-05	NI-NG-NI-NN-NI-HD-NS-NS-NN-NG-HD-NS-HD-NN-HD-HD-HD-NI-NG-NG	TAL20Xam668
Manes.01G114000.1.v7.0;pacid=41326770	65	+	0.335849	TATATACATGTCAAACCCCCG	1.52477e-05	NI-NG-NI-NN-NI-HD-NS-NS-NN-NG-HD-NS-HD-NN-HD-HD-HD-NI-NG-NG	TAL20Xam668
Manes.01G028100.1.v7.0;pacid=41326306	182	-	0.335803	TATCAACGAATCGTGACCGTT	1.52766e-05	NI-NG-NI-NN-NI-HD-NS-NS-NN-NG-HD-NS-HD-NN-HD-HD-HD-NI-NG-NG	TAL20Xam668
Manes.01G028100.2.v7.0;pacid=41326307	197	-	0.335803	TATCAACGAATCGTGACCGTT	1.52766e-05	NI-NG-NI-NN-NI-HD-NS-NS-NN-NG-HD-NS-HD-NN-HD-HD-HD-NI-NG-NG	TAL20Xam668
Manes.13G020200.1.v7.0;pacid=41337469	108	+	0.335799	TATAAACATCTTAATTCCATT	1.5279e-05	NI-NG-NI-NN-NI-HD-NS-NS-NN-NG-HD-NS-HD-NN-HD-HD-HD-NI-NG-NG	TAL20Xam668
Manes.03G098000.1.v7.0;pacid=41307597	258	+	0.335797	TATAAATCACACTCACCCTTT	1.52803e-05	NI-NG-NI-NN-NI-HD-NS-NS-NN-NG-HD-NS-HD-NN-HD-HD-HD-NI-NG-NG	TAL20Xam668
Manes.13G064500.1.v7.0;pacid=41338138	102	+	0.335753	TCTAGACCAGACCAAACCAGT	1.53081e-05	NI-NG-NI-NN-NI-HD-NS-NS-NN-NG-HD-NS-HD-NN-HD-HD-HD-NI-NG-NG	TAL20Xam668
Manes.08G098900.1.v7.0;pacid=41314331	284	+	0.335668	TATATACAACTCCCACAGAAT	1.53616e-05	NI-NG-NI-NN-NI-HD-NS-NS-NN-NG-HD-NS-HD-NN-HD-HD-HD-NI-NG-NG	TAL20Xam668
Manes.06G148300.1.v7.0;pacid=41303514	139	+	0.335666	TATAGTCAAATCTCCGACATT	1.53627e-05	NI-NG-NI-NN-NI-HD-NS-NS-NN-NG-HD-NS-HD-NN-HD-HD-HD-NI-NG-NG	TAL20Xam668
Manes.15G163200.1.v7.0;pacid=41305921	197	+	0.33563	CATAGTTAAGTCCCGCTCCTT	1.53856e-05	NI-NG-NI-NN-NI-HD-NS-NS-NN-NG-HD-NS-HD-NN-HD-HD-HD-NI-NG-NG	TAL20Xam668
Manes.16G133200.1.v7.0;pacid=41319423	181	+	0.335556	TGTAAACGCAACGCAACAATT	1.54329e-05	NI-NG-NI-NN-NI-HD-NS-NS-NN-NG-HD-NS-HD-NN-HD-HD-HD-NI-NG-NG	TAL20Xam668
Manes.06G108900.1.v7.0;pacid=41304110	48	+	0.335499	CAAATACTGCTCGCTCCTATT	1.54691e-05	NI-NG-NI-NN-NI-HD-NS-NS-NN-NG-HD-NS-HD-NN-HD-HD-HD-NI-NG-NG	TAL20Xam668
Manes.15G009100.1.v7.0;pacid=41306887	91	+	0.335457	TCTATACACTTCCCACCAACT	1.54953e-05	NI-NG-NI-NN-NI-HD-NS-NS-NN-NG-HD-NS-HD-NN-HD-HD-HD-NI-NG-NG	TAL20Xam668
Manes.15G022100.1.v7.0;pacid=41305671	200	+	0.335186	TTCATACACCACCCACCCATT	1.56692e-05	NI-NG-NI-NN-NI-HD-NS-NS-NN-NG-HD-NS-HD-NN-HD-HD-HD-NI-NG-NG	TAL20Xam668
Manes.02G063600.1.v7.0;pacid=41341023	206	+	0.335127	TATAGAAGGGTCTCCTGTATT	1.57068e-05	NI-NG-NI-NN-NI-HD-NS-NS-NN-NG-HD-NS-HD-NN-HD-HD-HD-NI-NG-NG	TAL20Xam668
Manes.02G143900.1.v7.0;pacid=41340913	12	-	0.335122	TATAAACGAATCAAGTCCAGA	1.57105e-05	NI-NG-NI-NN-NI-HD-NS-NS-NN-NG-HD-NS-HD-NN-HD-HD-HD-NI-NG-NG	TAL20Xam668
Manes.01G154800.1.v7.0;pacid=41327299	47	-	0.33506	TCTGAACAGAACAAACCCATT	1.57503e-05	NI-NG-NI-NN-NI-HD-NS-NS-NN-NG-HD-NS-HD-NN-HD-HD-HD-NI-NG-NG	TAL20Xam668
Manes.14G045400.1.v7.0;pacid=41332818	13	-	0.335016	TCTAGCCAACCCCCACACATT	1.57786e-05	NI-NG-NI-NN-NI-HD-NS-NS-NN-NG-HD-NS-HD-NN-HD-HD-HD-NI-NG-NG	TAL20Xam668
Manes.14G138400.1.v7.0;pacid=41331445	84	+	0.334767	CATTAAAGATTCATACCCATT	1.59408e-05	NI-NG-NI-NN-NI-HD-NS-NS-NN-NG-HD-NS-HD-NN-HD-HD-HD-NI-NG-NG	TAL20Xam668
Manes.17G090400.1.v7.0;pacid=41329606	5	-	0.334741	ATTAGACTAGTAAAGCCCAAT	1.59579e-05	NI-NG-NI-NN-NI-HD-NS-NS-NN-NG-HD-NS-HD-NN-HD-HD-HD-NI-NG-NG	TAL20Xam668
Manes.15G042000.1.v7.0;pacid=41306571	229	+	0.334651	TAAAAAAAGGTAAAATCCATT	1.60168e-05	NI-NG-NI-NN-NI-HD-NS-NS-NN-NG-HD-NS-HD-NN-HD-HD-HD-NI-NG-NG	TAL20Xam668
Manes.04G034300.1.v7.0;pacid=41316283	88	+	0.334636	CATAGACCTAATTCACCCATC	1.60269e-05	NI-NG-NI-NN-NI-HD-NS-NS-NN-NG-HD-NS-HD-NN-HD-HD-HD-NI-NG-NG	TAL20Xam668
Manes.03G039100.1.v7.0;pacid=41309693	33	-	0.334583	TATTGTTTAGTCACACCTATT	1.60615e-05	NI-NG-NI-NN-NI-HD-NS-NS-NN-NG-HD-NS-HD-NN-HD-HD-HD-NI-NG-NG	TAL20Xam668
Manes.12G125800.1.v7.0;pacid=41322358	193	+	0.334558	TATAGAAAACTCTCTCCCCCC	1.60785e-05	NI-NG-NI-NN-NI-HD-NS-NS-NN-NG-HD-NS-HD-NN-HD-HD-HD-NI-NG-NG	TAL20Xam668
Manes.14G057500.1.v7.0;pacid=41331974	102	-	0.334552	TACAAAATTTTCTTGCCCATT	1.60824e-05	NI-NG-NI-NN-NI-HD-NS-NS-NN-NG-HD-NS-HD-NN-HD-HD-HD-NI-NG-NG	TAL20Xam668
Manes.10G066100.1.v7.0;pacid=41320581	23	-	0.334548	CTTTGACACTTCTCGCCCATC	1.60847e-05	NI-NG-NI-NN-NI-HD-NS-NS-NN-NG-HD-NS-HD-NN-HD-HD-HD-NI-NG-NG	TAL20Xam668
Manes.01G071800.1.v7.0;pacid=41325705	212	+	0.334485	TATAGAAAATCCTCCACCACT	1.61263e-05	NI-NG-NI-NN-NI-HD-NS-NS-NN-NG-HD-NS-HD-NN-HD-HD-HD-NI-NG-NG	TAL20Xam668
Manes.13G061200.1.v7.0;pacid=41338885	140	+	0.334325	AGTAGACGATGAGCACCCATT	1.62325e-05	NI-NG-NI-NN-NI-HD-NS-NS-NN-NG-HD-NS-HD-NN-HD-HD-HD-NI-NG-NG	TAL20Xam668
Manes.12G142500.1.v7.0;pacid=41322865	413	+	0.334196	TATATATCTCTCTCTTCCATT	1.63187e-05	NI-NG-NI-NN-NI-HD-NS-NS-NN-NG-HD-NS-HD-NN-HD-HD-HD-NI-NG-NG	TAL20Xam668
Manes.13G062600.1.v7.0;pacid=41337942	239	+	0.33418	TATATAAATGTCATAACCATG	1.63292e-05	NI-NG-NI-NN-NI-HD-NS-NS-NN-NG-HD-NS-HD-NN-HD-HD-HD-NI-NG-NG	TAL20Xam668
Manes.13G062600.2.v7.0;pacid=41337943	239	+	0.33418	TATATAAATGTCATAACCATG	1.63292e-05	NI-NG-NI-NN-NI-HD-NS-NS-NN-NG-HD-NS-HD-NN-HD-HD-HD-NI-NG-NG	TAL20Xam668
Manes.08G141400.1.v7.0;pacid=41313893	139	-	0.334167	TATACACAAGTCCGACCCAAG	1.6338e-05	NI-NG-NI-NN-NI-HD-NS-NS-NN-NG-HD-NS-HD-NN-HD-HD-HD-NI-NG-NG	TAL20Xam668
Manes.13G104300.1.v7.0;pacid=41338266	219	+	0.334152	CTTAGACCAAACCCTCCCAAT	1.63484e-05	NI-NG-NI-NN-NI-HD-NS-NS-NN-NG-HD-NS-HD-NN-HD-HD-HD-NI-NG-NG	TAL20Xam668
Manes.15G124100.1.v7.0;pacid=41305784	135	-	0.334057	TATAAACAATTCCAGAAAATT	1.6412e-05	NI-NG-NI-NN-NI-HD-NS-NS-NN-NG-HD-NS-HD-NN-HD-HD-HD-NI-NG-NG	TAL20Xam668
Manes.13G125000.1.v7.0;pacid=41337433	264	+	0.334053	TAGAAACAAACAGCACCCAGT	1.64144e-05	NI-NG-NI-NN-NI-HD-NS-NS-NN-NG-HD-NS-HD-NN-HD-HD-HD-NI-NG-NG	TAL20Xam668
Manes.08G010100.1.v7.0;pacid=41313470	168	+	0.334048	TCCAGAAATTTCACCACCATT	1.6418e-05	NI-NG-NI-NN-NI-HD-NS-NS-NN-NG-HD-NS-HD-NN-HD-HD-HD-NI-NG-NG	TAL20Xam668
Manes.15G111700.1.v7.0;pacid=41306722	274	+	0.333911	TATAAACACATAAAATCTATT	1.65102e-05	NI-NG-NI-NN-NI-HD-NS-NS-NN-NG-HD-NS-HD-NN-HD-HD-HD-NI-NG-NG	TAL20Xam668
Manes.05G076000.1.v7.0;pacid=41336155	29	+	0.333896	TAAATTCACGTCCAACCCCTT	1.65205e-05	NI-NG-NI-NN-NI-HD-NS-NS-NN-NG-HD-NS-HD-NN-HD-HD-HD-NI-NG-NG	TAL20Xam668
Manes.16G084000.1.v7.0;pacid=41319355	46	+	0.333847	CATACAAGGGCCGCGCTCATG	1.6554e-05	NI-NG-NI-NN-NI-HD-NS-NS-NN-NG-HD-NS-HD-NN-HD-HD-HD-NI-NG-NG	TAL20Xam668
Manes.13G071900.1.v7.0;pacid=41338891	272	+	0.333828	CATAGGCTACTCAACCTCATT	1.65664e-05	NI-NG-NI-NN-NI-HD-NS-NS-NN-NG-HD-NS-HD-NN-HD-HD-HD-NI-NG-NG	TAL20Xam668
Manes.12G048200.1.v7.0;pacid=41322727	57	+	0.333717	TATATAAGAATTGAACCCATA	1.66418e-05	NI-NG-NI-NN-NI-HD-NS-NS-NN-NG-HD-NS-HD-NN-HD-HD-HD-NI-NG-NG	TAL20Xam668
Manes.02G021700.1.v7.0;pacid=41340826	96	+	0.333609	CACAAGCGCGCCACGCCCACT	1.67159e-05	NI-NG-NI-NN-NI-HD-NS-NS-NN-NG-HD-NS-HD-NN-HD-HD-HD-NI-NG-NG	TAL20Xam668
Manes.15G131000.1.v7.0;pacid=41306809	161	+	0.333505	CATCCCCACATCACACCCATG	1.67873e-05	NI-NG-NI-NN-NI-HD-NS-NS-NN-NG-HD-NS-HD-NN-HD-HD-HD-NI-NG-NG	TAL20Xam668
Manes.02G030000.1.v7.0;pacid=41340107	142	+	0.333458	AATAAAATATTCCCCCCCACT	1.68199e-05	NI-NG-NI-NN-NI-HD-NS-NS-NN-NG-HD-NS-HD-NN-HD-HD-HD-NI-NG-NG	TAL20Xam668
Manes.06G118900.1.v7.0;pacid=41302826	197	+	0.333333	GACAAACAAATCACGACCATC	1.6906e-05	NI-NG-NI-NN-NI-HD-NS-NS-NN-NG-HD-NS-HD-NN-HD-HD-HD-NI-NG-NG	TAL20Xam668
Manes.06G118900.2.v7.0;pacid=41302827	197	+	0.333333	GACAAACAAATCACGACCATC	1.6906e-05	NI-NG-NI-NN-NI-HD-NS-NS-NN-NG-HD-NS-HD-NN-HD-HD-HD-NI-NG-NG	TAL20Xam668
Manes.12G064600.1.v7.0;pacid=41323449	292	+	0.333303	TATACAACAGCCACCCCCAAA	1.69266e-05	NI-NG-NI-NN-NI-HD-NS-NS-NN-NG-HD-NS-HD-NN-HD-HD-HD-NI-NG-NG	TAL20Xam668
Manes.16G120500.1.v7.0;pacid=41319642	128	-	0.33327	TATAAATGGCTCAAAACCCTT	1.69494e-05	NI-NG-NI-NN-NI-HD-NS-NS-NN-NG-HD-NS-HD-NN-HD-HD-HD-NI-NG-NG	TAL20Xam668
Manes.01G024300.1.v7.0;pacid=41326695	239	+	0.333195	TTCACACTCTACTCGCCCATT	1.70013e-05	NI-NG-NI-NN-NI-HD-NS-NS-NN-NG-HD-NS-HD-NN-HD-HD-HD-NI-NG-NG	TAL20Xam668
Manes.17G056500.1.v7.0;pacid=41329621	312	+	0.333181	CATAGCCAAGCCAAGATCATT	1.70114e-05	NI-NG-NI-NN-NI-HD-NS-NS-NN-NG-HD-NS-HD-NN-HD-HD-HD-NI-NG-NG	TAL20Xam668
Manes.05G129500.1.v7.0;pacid=41334871	215	-	0.333178	TTACGACGTGCCACGACCATT	1.70135e-05	NI-NG-NI-NN-NI-HD-NS-NS-NN-NG-HD-NS-HD-NN-HD-HD-HD-NI-NG-NG	TAL20Xam668
Manes.01G079100.1.v7.0;pacid=41326299	12	+	0.333135	TATAAAGTAATCTAACCAATT	1.70436e-05	NI-NG-NI-NN-NI-HD-NS-NS-NN-NG-HD-NS-HD-NN-HD-HD-HD-NI-NG-NG	TAL20Xam668
Manes.06G095200.1.v7.0;pacid=41304078	351	+	0.333108	TTTAAACGAATCAAACCCGAT	1.70621e-05	NI-NG-NI-NN-NI-HD-NS-NS-NN-NG-HD-NS-HD-NN-HD-HD-HD-NI-NG-NG	TAL20Xam668
Manes.01G213100.1.v7.0;pacid=41324535	208	-	0.333053	AAACGACATGTCGCTCACATT	1.71006e-05	NI-NG-NI-NN-NI-HD-NS-NS-NN-NG-HD-NS-HD-NN-HD-HD-HD-NI-NG-NG	TAL20Xam668
Manes.01G213100.2.v7.0;pacid=41324536	208	-	0.333053	AAACGACATGTCGCTCACATT	1.71006e-05	NI-NG-NI-NN-NI-HD-NS-NS-NN-NG-HD-NS-HD-NN-HD-HD-HD-NI-NG-NG	TAL20Xam668
Manes.03G086700.1.v7.0;pacid=41307697	182	+	0.332945	CCTTACCTGGTCACGCCCATA	1.7176e-05	NI-NG-NI-NN-NI-HD-NS-NS-NN-NG-HD-NS-HD-NN-HD-HD-HD-NI-NG-NG	TAL20Xam668
Manes.11G008300.1.v7.0;pacid=41317380	223	+	0.332941	TAAAGTCATGCCTAGCCCCTT	1.71787e-05	NI-NG-NI-NN-NI-HD-NS-NS-NN-NG-HD-NS-HD-NN-HD-HD-HD-NI-NG-NG	TAL20Xam668
Manes.12G045200.1.v7.0;pacid=41324023	101	-	0.332926	CAAAAACAGATCTCGCCGATC	1.71893e-05	NI-NG-NI-NN-NI-HD-NS-NS-NN-NG-HD-NS-HD-NN-HD-HD-HD-NI-NG-NG	TAL20Xam668
Manes.06G168100.1.v7.0;pacid=41304424	97	+	0.332848	TATATACACGACCCGCTCACC	1.72443e-05	NI-NG-NI-NN-NI-HD-NS-NS-NN-NG-HD-NS-HD-NN-HD-HD-HD-NI-NG-NG	TAL20Xam668
Manes.11G111800.1.v7.0;pacid=41317036	139	-	0.332751	TATACCAGATTCACCCCTATT	1.7313e-05	NI-NG-NI-NN-NI-HD-NS-NS-NN-NG-HD-NS-HD-NN-HD-HD-HD-NI-NG-NG	TAL20Xam668
Manes.03G068900.2.v7.0;pacid=41308532	228	-	0.332637	TATAGCATATTCAAATCCATT	1.73936e-05	NI-NG-NI-NN-NI-HD-NS-NS-NN-NG-HD-NS-HD-NN-HD-HD-HD-NI-NG-NG	TAL20Xam668
Manes.03G068900.3.v7.0;pacid=41308533	17	-	0.332637	TATAGCATATTCAAATCCATT	1.73936e-05	NI-NG-NI-NN-NI-HD-NS-NS-NN-NG-HD-NS-HD-NN-HD-HD-HD-NI-NG-NG	TAL20Xam668
Manes.06G010600.1.v7.0;pacid=41304462	77	-	0.33263	TAGACACGTGTCCCTTCCACT	1.73991e-05	NI-NG-NI-NN-NI-HD-NS-NS-NN-NG-HD-NS-HD-NN-HD-HD-HD-NI-NG-NG	TAL20Xam668
Manes.06G010600.2.v7.0;pacid=41304463	77	-	0.33263	TAGACACGTGTCCCTTCCACT	1.73991e-05	NI-NG-NI-NN-NI-HD-NS-NS-NN-NG-HD-NS-HD-NN-HD-HD-HD-NI-NG-NG	TAL20Xam668
Manes.S003000.1.v7.0;pacid=41327525	297	-	0.332577	CATAGAGGGAGCAAACCCATT	1.74362e-05	NI-NG-NI-NN-NI-HD-NS-NS-NN-NG-HD-NS-HD-NN-HD-HD-HD-NI-NG-NG	TAL20Xam668
Manes.04G008300.1.v7.0;pacid=41316216	234	+	0.332559	TAAAGAAAAATCCCTCCCTAT	1.74492e-05	NI-NG-NI-NN-NI-HD-NS-NS-NN-NG-HD-NS-HD-NN-HD-HD-HD-NI-NG-NG	TAL20Xam668
Manes.02G033900.1.v7.0;pacid=41339843	44	+	0.33253	TATCATCCAGTCAAGACCTTT	1.747e-05	NI-NG-NI-NN-NI-HD-NS-NS-NN-NG-HD-NS-HD-NN-HD-HD-HD-NI-NG-NG	TAL20Xam668
Manes.08G136600.1.v7.0;pacid=41313742	252	+	0.332447	TATCCAACACTCGCGCCTCTT	1.75296e-05	NI-NG-NI-NN-NI-HD-NS-NS-NN-NG-HD-NS-HD-NN-HD-HD-HD-NI-NG-NG	TAL20Xam668
Manes.01G176900.1.v7.0;pacid=41326810	145	-	0.332426	TATAGACGAAACACTACAATG	1.75441e-05	NI-NG-NI-NN-NI-HD-NS-NS-NN-NG-HD-NS-HD-NN-HD-HD-HD-NI-NG-NG	TAL20Xam668
Manes.15G156200.1.v7.0;pacid=41305131	135	+	0.332419	TAAAGACAAGTCACAGATATT	1.75496e-05	NI-NG-NI-NN-NI-HD-NS-NS-NN-NG-HD-NS-HD-NN-HD-HD-HD-NI-NG-NG	TAL20Xam668
Manes.05G173400.1.v7.0;pacid=41335548	175	+	0.332357	TATAAACTCTTCACTACTCTT	1.75939e-05	NI-NG-NI-NN-NI-HD-NS-NS-NN-NG-HD-NS-HD-NN-HD-HD-HD-NI-NG-NG	TAL20Xam668
Manes.02G101500.1.v7.0;pacid=41340543	176	-	0.332221	CATAATCGCGTCTCACCGAAT	1.76918e-05	NI-NG-NI-NN-NI-HD-NS-NS-NN-NG-HD-NS-HD-NN-HD-HD-HD-NI-NG-NG	TAL20Xam668
Manes.02G101500.2.v7.0;pacid=41340544	176	-	0.332221	CATAATCGCGTCTCACCGAAT	1.76918e-05	NI-NG-NI-NN-NI-HD-NS-NS-NN-NG-HD-NS-HD-NN-HD-HD-HD-NI-NG-NG	TAL20Xam668
Manes.02G101500.3.v7.0;pacid=41340545	176	-	0.332221	CATAATCGCGTCTCACCGAAT	1.76918e-05	NI-NG-NI-NN-NI-HD-NS-NS-NN-NG-HD-NS-HD-NN-HD-HD-HD-NI-NG-NG	TAL20Xam668
Manes.11G161300.1.v7.0;pacid=41316687	115	-	0.33218	TATAAACTCATCAAAACCCTC	1.77212e-05	NI-NG-NI-NN-NI-HD-NS-NS-NN-NG-HD-NS-HD-NN-HD-HD-HD-NI-NG-NG	TAL20Xam668
Manes.07G080700.1.v7.0;pacid=41329197	5	+	0.33201	TATATACACATCAACTTCATT	1.78449e-05	NI-NG-NI-NN-NI-HD-NS-NS-NN-NG-HD-NS-HD-NN-HD-HD-HD-NI-NG-NG	TAL20Xam668
Manes.02G201700.1.v7.0;pacid=41341693	223	+	0.331977	CACAGGCACATCACCCCGATT	1.78687e-05	NI-NG-NI-NN-NI-HD-NS-NS-NN-NG-HD-NS-HD-NN-HD-HD-HD-NI-NG-NG	TAL20Xam668
Manes.08G114000.1.v7.0;pacid=41313923	292	-	0.331977	TATAGATGAAACTCGCTCCTT	1.78689e-05	NI-NG-NI-NN-NI-HD-NS-NS-NN-NG-HD-NS-HD-NN-HD-HD-HD-NI-NG-NG	TAL20Xam668
Manes.08G114000.3.v7.0;pacid=41313924	126	-	0.331977	TATAGATGAAACTCGCTCCTT	1.78689e-05	NI-NG-NI-NN-NI-HD-NS-NS-NN-NG-HD-NS-HD-NN-HD-HD-HD-NI-NG-NG	TAL20Xam668
Manes.08G114000.2.v7.0;pacid=41313925	292	-	0.331977	TATAGATGAAACTCGCTCCTT	1.78689e-05	NI-NG-NI-NN-NI-HD-NS-NS-NN-NG-HD-NS-HD-NN-HD-HD-HD-NI-NG-NG	TAL20Xam668
Manes.08G114000.4.v7.0;pacid=41313926	126	-	0.331977	TATAGATGAAACTCGCTCCTT	1.78689e-05	NI-NG-NI-NN-NI-HD-NS-NS-NN-NG-HD-NS-HD-NN-HD-HD-HD-NI-NG-NG	TAL20Xam668
Manes.05G155100.1.v7.0;pacid=41334869	215	+	0.331915	TACGAAAAAGCCTAGCCCATT	1.79146e-05	NI-NG-NI-NN-NI-HD-NS-NS-NN-NG-HD-NS-HD-NN-HD-HD-HD-NI-NG-NG	TAL20Xam668
Manes.09G171600.1.v7.0;pacid=41311358	55	+	0.331913	TATATACCCTTCTCTTCTATT	1.79159e-05	NI-NG-NI-NN-NI-HD-NS-NS-NN-NG-HD-NS-HD-NN-HD-HD-HD-NI-NG-NG	TAL20Xam668
Manes.01G150500.1.v7.0;pacid=41325664	62	+	0.331882	AAGAGACTGAAATCACCCATT	1.79382e-05	NI-NG-NI-NN-NI-HD-NS-NS-NN-NG-HD-NS-HD-NN-HD-HD-HD-NI-NG-NG	TAL20Xam668
Manes.14G033100.1.v7.0;pacid=41332196	181	+	0.33184	CCAAGACGGACCTCAACCATT	1.79692e-05	NI-NG-NI-NN-NI-HD-NS-NS-NN-NG-HD-NS-HD-NN-HD-HD-HD-NI-NG-NG	TAL20Xam668
Manes.14G033100.4.v7.0;pacid=41332197	181	+	0.33184	CCAAGACGGACCTCAACCATT	1.79692e-05	NI-NG-NI-NN-NI-HD-NS-NS-NN-NG-HD-NS-HD-NN-HD-HD-HD-NI-NG-NG	TAL20Xam668
Manes.14G033100.2.v7.0;pacid=41332198	184	+	0.33184	CCAAGACGGACCTCAACCATT	1.79692e-05	NI-NG-NI-NN-NI-HD-NS-NS-NN-NG-HD-NS-HD-NN-HD-HD-HD-NI-NG-NG	TAL20Xam668
Manes.14G033100.3.v7.0;pacid=41332199	184	+	0.33184	CCAAGACGGACCTCAACCATT	1.79692e-05	NI-NG-NI-NN-NI-HD-NS-NS-NN-NG-HD-NS-HD-NN-HD-HD-HD-NI-NG-NG	TAL20Xam668
Manes.12G138900.1.v7.0;pacid=41323819	148	+	0.331506	TATACACATTTCAACCCCAGC	1.82157e-05	NI-NG-NI-NN-NI-HD-NS-NS-NN-NG-HD-NS-HD-NN-HD-HD-HD-NI-NG-NG	TAL20Xam668
Manes.03G131300.1.v7.0;pacid=41309110	236	+	0.331496	CATAGACCAACAACACACCTT	1.8223e-05	NI-NG-NI-NN-NI-HD-NS-NS-NN-NG-HD-NS-HD-NN-HD-HD-HD-NI-NG-NG	TAL20Xam668
Manes.05G162800.1.v7.0;pacid=41335679	41	-	0.331434	TCTAAATTAATCGAGCCCATA	1.82693e-05	NI-NG-NI-NN-NI-HD-NS-NS-NN-NG-HD-NS-HD-NN-HD-HD-HD-NI-NG-NG	TAL20Xam668
Manes.15G097100.1.v7.0;pacid=41305148	352	-	0.331415	TATAGAAGATCCATACCAATT	1.8283e-05	NI-NG-NI-NN-NI-HD-NS-NS-NN-NG-HD-NS-HD-NN-HD-HD-HD-NI-NG-NG	TAL20Xam668
Manes.15G084600.1.v7.0;pacid=41305156	7	-	0.331283	AATAAAAAACTCACAACCAAT	1.83822e-05	NI-NG-NI-NN-NI-HD-NS-NS-NN-NG-HD-NS-HD-NN-HD-HD-HD-NI-NG-NG	TAL20Xam668
Manes.09G149100.1.v7.0;pacid=41311053	195	-	0.331282	CAAAGACTTGTTGAGCCCATC	1.83829e-05	NI-NG-NI-NN-NI-HD-NS-NS-NN-NG-HD-NS-HD-NN-HD-HD-HD-NI-NG-NG	TAL20Xam668
Manes.09G149100.1.v7.0;pacid=41311053	161	-	0.331282	CAAAGACTTGTTGAGCCCATC	1.83829e-05	NI-NG-NI-NN-NI-HD-NS-NS-NN-NG-HD-NS-HD-NN-HD-HD-HD-NI-NG-NG	TAL20Xam668
Manes.S031400.1.v7.0;pacid=41307447	161	-	0.331264	TAGAGTCGACACGCACCCATC	1.83964e-05	NI-NG-NI-NN-NI-HD-NS-NS-NN-NG-HD-NS-HD-NN-HD-HD-HD-NI-NG-NG	TAL20Xam668
Manes.16G026500.1.v7.0;pacid=41319789	151	+	0.33101	TCTCAAGAGGTCCCAACCATT	1.85876e-05	NI-NG-NI-NN-NI-HD-NS-NS-NN-NG-HD-NS-HD-NN-HD-HD-HD-NI-NG-NG	TAL20Xam668
Manes.11G165700.1.v7.0;pacid=41317397	44	+	0.330999	TATATACATGTCTCAACCCCA	1.85954e-05	NI-NG-NI-NN-NI-HD-NS-NS-NN-NG-HD-NS-HD-NN-HD-HD-HD-NI-NG-NG	TAL20Xam668
Manes.03G200000.1.v7.0;pacid=41309284	112	+	0.330849	CCAAGCCTAATCACGCCCAAT	1.87095e-05	NI-NG-NI-NN-NI-HD-NS-NS-NN-NG-HD-NS-HD-NN-HD-HD-HD-NI-NG-NG	TAL20Xam668
Manes.14G143200.1.v7.0;pacid=41331395	151	+	0.330763	TATCATCTCGTCTTGCACATT	1.87754e-05	NI-NG-NI-NN-NI-HD-NS-NS-NN-NG-HD-NS-HD-NN-HD-HD-HD-NI-NG-NG	TAL20Xam668
Manes.06G026100.1.v7.0;pacid=41303166	391	+	0.330682	CATACACCAGAGAAACCCATT	1.88369e-05	NI-NG-NI-NN-NI-HD-NS-NS-NN-NG-HD-NS-HD-NN-HD-HD-HD-NI-NG-NG	TAL20Xam668
Manes.07G126800.1.v7.0;pacid=41328712	27	+	0.330627	CATAAACCAATTCAACTCATT	1.88793e-05	NI-NG-NI-NN-NI-HD-NS-NS-NN-NG-HD-NS-HD-NN-HD-HD-HD-NI-NG-NG	TAL20Xam668
Manes.15G020800.1.v7.0;pacid=41306671	53	+	0.330615	TACTGATTAGTCGCTCCTATT	1.88889e-05	NI-NG-NI-NN-NI-HD-NS-NS-NN-NG-HD-NS-HD-NN-HD-HD-HD-NI-NG-NG	TAL20Xam668
Manes.08G124000.1.v7.0;pacid=41312898	120	+	0.330592	AATAAAGAAATCCCACCAATT	1.89064e-05	NI-NG-NI-NN-NI-HD-NS-NS-NN-NG-HD-NS-HD-NN-HD-HD-HD-NI-NG-NG	TAL20Xam668
Manes.15G113300.1.v7.0;pacid=41305988	187	+	0.330475	TATAGAATAGTAGCTACAATG	1.89965e-05	NI-NG-NI-NN-NI-HD-NS-NS-NN-NG-HD-NS-HD-NN-HD-HD-HD-NI-NG-NG	TAL20Xam668
Manes.10G081400.1.v7.0;pacid=41321522	317	+	0.330432	CCTAAACACTCCACACCCCTT	1.90297e-05	NI-NG-NI-NN-NI-HD-NS-NS-NN-NG-HD-NS-HD-NN-HD-HD-HD-NI-NG-NG	TAL20Xam668
Manes.15G053700.1.v7.0;pacid=41306365	189	+	0.330368	TGTCGACAGATCTCTACCATG	1.90799e-05	NI-NG-NI-NN-NI-HD-NS-NS-NN-NG-HD-NS-HD-NN-HD-HD-HD-NI-NG-NG	TAL20Xam668
Manes.15G053700.2.v7.0;pacid=41306366	234	+	0.330368	TGTCGACAGATCTCTACCATG	1.90799e-05	NI-NG-NI-NN-NI-HD-NS-NS-NN-NG-HD-NS-HD-NN-HD-HD-HD-NI-NG-NG	TAL20Xam668
Manes.15G091900.1.v7.0;pacid=41305460	125	+	0.330235	TTTTAACGAATCAAACCGATT	1.9183e-05	NI-NG-NI-NN-NI-HD-NS-NS-NN-NG-HD-NS-HD-NN-HD-HD-HD-NI-NG-NG	TAL20Xam668
Manes.14G013500.1.v7.0;pacid=41332127	58	+	0.330225	AAAAGACACAACAAGACCATT	1.91911e-05	NI-NG-NI-NN-NI-HD-NS-NS-NN-NG-HD-NS-HD-NN-HD-HD-HD-NI-NG-NG	TAL20Xam668
Manes.05G113400.1.v7.0;pacid=41336098	269	+	0.330174	TTTTGACAGATCTGGACCATT	1.92305e-05	NI-NG-NI-NN-NI-HD-NS-NS-NN-NG-HD-NS-HD-NN-HD-HD-HD-NI-NG-NG	TAL20Xam668
Manes.02G043500.1.v7.0;pacid=41339593	40	+	0.329974	TGCTGACACGTCACAACCACT	1.93878e-05	NI-NG-NI-NN-NI-HD-NS-NS-NN-NG-HD-NS-HD-NN-HD-HD-HD-NI-NG-NG	TAL20Xam668
Manes.02G045700.1.v7.0;pacid=41341146	84	+	0.329901	AATAGACAACGCCTGCCAATT	1.94453e-05	NI-NG-NI-NN-NI-HD-NS-NS-NN-NG-HD-NS-HD-NN-HD-HD-HD-NI-NG-NG	TAL20Xam668
Manes.02G117500.1.v7.0;pacid=41309889	232	+	0.329884	TATATACAACTCACTCCACGT	1.94586e-05	NI-NG-NI-NN-NI-HD-NS-NS-NN-NG-HD-NS-HD-NN-HD-HD-HD-NI-NG-NG	TAL20Xam668
Manes.05G035900.1.v7.0;pacid=41336549	189	-	0.329782	TACTGACGAATAGCGACTATT	1.95396e-05	NI-NG-NI-NN-NI-HD-NS-NS-NN-NG-HD-NS-HD-NN-HD-HD-HD-NI-NG-NG	TAL20Xam668
Manes.13G074600.1.v7.0;pacid=41338890	129	-	0.32977	TATATACTACTCCTGCCACTT	1.95486e-05	NI-NG-NI-NN-NI-HD-NS-NS-NN-NG-HD-NS-HD-NN-HD-HD-HD-NI-NG-NG	TAL20Xam668
Manes.13G124800.1.v7.0;pacid=41337336	42	+	0.329743	TCTAGGACAATTGAGCCCATT	1.95705e-05	NI-NG-NI-NN-NI-HD-NS-NS-NN-NG-HD-NS-HD-NN-HD-HD-HD-NI-NG-NG	TAL20Xam668
Manes.03G037600.1.v7.0;pacid=41308090	191	-	0.329737	TATAAAAACATAACATCCATA	1.95754e-05	NI-NG-NI-NN-NI-HD-NS-NS-NN-NG-HD-NS-HD-NN-HD-HD-HD-NI-NG-NG	TAL20Xam668
Manes.15G004900.1.v7.0;pacid=41306044	222	+	0.329674	TATATCCGTGTCTTCTCCATT	1.96251e-05	NI-NG-NI-NN-NI-HD-NS-NS-NN-NG-HD-NS-HD-NN-HD-HD-HD-NI-NG-NG	TAL20Xam668
Manes.S001700.1.v7.0;pacid=41316557	262	-	0.329637	CCTCGACTCATCTCCACCATT	1.96545e-05	NI-NG-NI-NN-NI-HD-NS-NS-NN-NG-HD-NS-HD-NN-HD-HD-HD-NI-NG-NG	TAL20Xam668
Manes.07G099000.1.v7.0;pacid=41327638	45	+	0.329621	TATAGACTCGGAACTCTCTTT	1.96676e-05	NI-NG-NI-NN-NI-HD-NS-NS-NN-NG-HD-NS-HD-NN-HD-HD-HD-NI-NG-NG	TAL20Xam668
Manes.10G088200.1.v7.0;pacid=41320688	113	+	0.32959	TATCAACGGCTCGTGCACTTT	1.96923e-05	NI-NG-NI-NN-NI-HD-NS-NS-NN-NG-HD-NS-HD-NN-HD-HD-HD-NI-NG-NG	TAL20Xam668
Manes.01G244000.1.v7.0;pacid=41326646	50	+	0.329393	TATAGTCAAGACACACACACA	1.98508e-05	NI-NG-NI-NN-NI-HD-NS-NS-NN-NG-HD-NS-HD-NN-HD-HD-HD-NI-NG-NG	TAL20Xam668
Manes.01G244000.2.v7.0;pacid=41326647	50	+	0.329393	TATAGTCAAGACACACACACA	1.98508e-05	NI-NG-NI-NN-NI-HD-NS-NS-NN-NG-HD-NS-HD-NN-HD-HD-HD-NI-NG-NG	TAL20Xam668
Manes.02G090400.1.v7.0;pacid=41340339	1	+	0.329355	TGTATACAGCTCAAGCACACT	1.98812e-05	NI-NG-NI-NN-NI-HD-NS-NS-NN-NG-HD-NS-HD-NN-HD-HD-HD-NI-NG-NG	TAL20Xam668
Manes.07G114600.1.v7.0;pacid=41328571	12	+	0.329351	CCTAGCAGCATCACCACCATT	1.98845e-05	NI-NG-NI-NN-NI-HD-NS-NS-NN-NG-HD-NS-HD-NN-HD-HD-HD-NI-NG-NG	TAL20Xam668
Manes.05G157300.1.v7.0;pacid=41336337	84	+	0.329304	TTTACACGTGTACACCACATT	1.99219e-05	NI-NG-NI-NN-NI-HD-NS-NS-NN-NG-HD-NS-HD-NN-HD-HD-HD-NI-NG-NG	TAL20Xam668
Manes.13G051600.1.v7.0;pacid=41337980	231	+	0.329299	CATAAAATCATCACACCCTTG	1.99268e-05	NI-NG-NI-NN-NI-HD-NS-NS-NN-NG-HD-NS-HD-NN-HD-HD-HD-NI-NG-NG	TAL20Xam668
Manes.01G191800.1.v7.0;pacid=41325004	144	-	0.329261	TATAAAAGCGTAAAACCCAAC	1.99575e-05	NI-NG-NI-NN-NI-HD-NS-NS-NN-NG-HD-NS-HD-NN-HD-HD-HD-NI-NG-NG	TAL20Xam668
Manes.15G156900.1.v7.0;pacid=41306152	390	+	0.329149	TAAAGACCTCTCTCTCTCTTT	2.00481e-05	NI-NG-NI-NN-NI-HD-NS-NS-NN-NG-HD-NS-HD-NN-HD-HD-HD-NI-NG-NG	TAL20Xam668
Manes.10G028000.1.v7.0;pacid=41320779	150	+	0.32901	TATAGACAACTAACCAGGATT	2.01614e-05	NI-NG-NI-NN-NI-HD-NS-NS-NN-NG-HD-NS-HD-NN-HD-HD-HD-NI-NG-NG	TAL20Xam668
Manes.01G209100.1.v7.0;pacid=41325052	256	+	0.328914	TATATACCACTCTCACCAAAG	2.02402e-05	NI-NG-NI-NN-NI-HD-NS-NS-NN-NG-HD-NS-HD-NN-HD-HD-HD-NI-NG-NG	TAL20Xam668
Manes.13G155600.1.v7.0;pacid=41338027	271	+	0.328908	TGTTGAAAACTATAGCCCATT	2.0245e-05	NI-NG-NI-NN-NI-HD-NS-NS-NN-NG-HD-NS-HD-NN-HD-HD-HD-NI-NG-NG	TAL20Xam668
Manes.13G155600.2.v7.0;pacid=41338028	271	+	0.328908	TGTTGAAAACTATAGCCCATT	2.0245e-05	NI-NG-NI-NN-NI-HD-NS-NS-NN-NG-HD-NS-HD-NN-HD-HD-HD-NI-NG-NG	TAL20Xam668
Manes.03G086800.1.v7.0;pacid=41308461	92	+	0.328745	TATAGACTTATTTAAACTATT	2.0379e-05	NI-NG-NI-NN-NI-HD-NS-NS-NN-NG-HD-NS-HD-NN-HD-HD-HD-NI-NG-NG	TAL20Xam668
Manes.13G094100.1.v7.0;pacid=41338338	190	-	0.328728	CATGCACAGGACTTACCCATT	2.03932e-05	NI-NG-NI-NN-NI-HD-NS-NS-NN-NG-HD-NS-HD-NN-HD-HD-HD-NI-NG-NG	TAL20Xam668
Manes.16G049700.1.v7.0;pacid=41319135	331	+	0.328717	TATTAACCTTGCAATCCCATT	2.04027e-05	NI-NG-NI-NN-NI-HD-NS-NS-NN-NG-HD-NS-HD-NN-HD-HD-HD-NI-NG-NG	TAL20Xam668
Manes.08G089100.1.v7.0;pacid=41313327	150	+	0.328643	TATTAACATTTAACAACCACT	2.04639e-05	NI-NG-NI-NN-NI-HD-NS-NS-NN-NG-HD-NS-HD-NN-HD-HD-HD-NI-NG-NG	TAL20Xam668
Manes.11G144200.1.v7.0;pacid=41317832	403	-	0.328592	TACAGAGGGCTCAAGCCCAAT	2.05055e-05	NI-NG-NI-NN-NI-HD-NS-NS-NN-NG-HD-NS-HD-NN-HD-HD-HD-NI-NG-NG	TAL20Xam668
Manes.15G144900.1.v7.0;pacid=41305775	198	-	0.328591	TATTAATTAATATCTCCCATT	2.05068e-05	NI-NG-NI-NN-NI-HD-NS-NS-NN-NG-HD-NS-HD-NN-HD-HD-HD-NI-NG-NG	TAL20Xam668
Manes.04G016100.1.v7.0;pacid=41314838	124	+	0.328558	TATAAATGAAAACCACACATT	2.05343e-05	NI-NG-NI-NN-NI-HD-NS-NS-NN-NG-HD-NS-HD-NN-HD-HD-HD-NI-NG-NG	TAL20Xam668
Manes.10G033100.1.v7.0;pacid=41321508	291	+	0.328527	TATAATCTAGTGACCCCCATG	2.05597e-05	NI-NG-NI-NN-NI-HD-NS-NS-NN-NG-HD-NS-HD-NN-HD-HD-HD-NI-NG-NG	TAL20Xam668
Manes.13G011700.1.v7.0;pacid=41338216	79	-	0.328469	TATTAACCTCTCGATCTCATT	2.06087e-05	NI-NG-NI-NN-NI-HD-NS-NS-NN-NG-HD-NS-HD-NN-HD-HD-HD-NI-NG-NG	TAL20Xam668
Manes.05G086000.1.v7.0;pacid=41335085	303	+	0.328451	TATAGAGTCGTAGATCCAATT	2.06236e-05	NI-NG-NI-NN-NI-HD-NS-NS-NN-NG-HD-NS-HD-NN-HD-HD-HD-NI-NG-NG	TAL20Xam668
Manes.02G070700.1.v7.0;pacid=41340805	113	+	0.328431	TATGCACGTGTCTCACCCCCC	2.06403e-05	NI-NG-NI-NN-NI-HD-NS-NS-NN-NG-HD-NS-HD-NN-HD-HD-HD-NI-NG-NG	TAL20Xam668
Manes.08G054300.1.v7.0;pacid=41312749	189	-	0.328361	TATTAACAAGTCAATCTCATA	2.06985e-05	NI-NG-NI-NN-NI-HD-NS-NS-NN-NG-HD-NS-HD-NN-HD-HD-HD-NI-NG-NG	TAL20Xam668
Manes.18G081100.1.v7.0;pacid=41334271	188	+	0.32828	CACAGAACACTCTCCTCCATT	2.07667e-05	NI-NG-NI-NN-NI-HD-NS-NS-NN-NG-HD-NS-HD-NN-HD-HD-HD-NI-NG-NG	TAL20Xam668
Manes.18G081100.3.v7.0;pacid=41334272	188	+	0.32828	CACAGAACACTCTCCTCCATT	2.07667e-05	NI-NG-NI-NN-NI-HD-NS-NS-NN-NG-HD-NS-HD-NN-HD-HD-HD-NI-NG-NG	TAL20Xam668
Manes.08G111700.2.v7.0;pacid=41313957	174	-	0.328194	TATAACCTAGTATCACATATT	2.0839e-05	NI-NG-NI-NN-NI-HD-NS-NS-NN-NG-HD-NS-HD-NN-HD-HD-HD-NI-NG-NG	TAL20Xam668
Manes.12G075900.1.v7.0;pacid=41323661	264	-	0.328114	TTTATACGAGTCAGCACCATT	2.09072e-05	NI-NG-NI-NN-NI-HD-NS-NS-NN-NG-HD-NS-HD-NN-HD-HD-HD-NI-NG-NG	TAL20Xam668
Manes.12G075900.2.v7.0;pacid=41323662	264	-	0.328114	TTTATACGAGTCAGCACCATT	2.09072e-05	NI-NG-NI-NN-NI-HD-NS-NS-NN-NG-HD-NS-HD-NN-HD-HD-HD-NI-NG-NG	TAL20Xam668
Manes.01G055100.1.v7.0;pacid=41325967	214	+	0.328104	TATAAATGGAGCGCGCCTATA	2.09149e-05	NI-NG-NI-NN-NI-HD-NS-NS-NN-NG-HD-NS-HD-NN-HD-HD-HD-NI-NG-NG	TAL20Xam668
Manes.03G184600.1.v7.0;pacid=41309609	194	-	0.328077	TATAAATAAGGCACACCAACT	2.09384e-05	NI-NG-NI-NN-NI-HD-NS-NS-NN-NG-HD-NS-HD-NN-HD-HD-HD-NI-NG-NG	TAL20Xam668
Manes.15G093100.1.v7.0;pacid=41306291	146	+	0.328059	TATAAAAAAGTCAAAATTATT	2.09536e-05	NI-NG-NI-NN-NI-HD-NS-NS-NN-NG-HD-NS-HD-NN-HD-HD-HD-NI-NG-NG	TAL20Xam668
Manes.17G092800.1.v7.0;pacid=41329547	162	+	0.327985	TTTATAAGCTTCTCACCCTTT	2.10163e-05	NI-NG-NI-NN-NI-HD-NS-NS-NN-NG-HD-NS-HD-NN-HD-HD-HD-NI-NG-NG	TAL20Xam668
Manes.13G093500.1.v7.0;pacid=41337690	52	-	0.327785	TACAGAAGGATATCAACCATC	2.1187e-05	NI-NG-NI-NN-NI-HD-NS-NS-NN-NG-HD-NS-HD-NN-HD-HD-HD-NI-NG-NG	TAL20Xam668
Manes.04G067000.1.v7.0;pacid=41314781	22	-	0.327778	TTTATACATGTTTCATCCATT	2.11926e-05	NI-NG-NI-NN-NI-HD-NS-NS-NN-NG-HD-NS-HD-NN-HD-HD-HD-NI-NG-NG	TAL20Xam668
Manes.04G067000.2.v7.0;pacid=41314782	22	-	0.327778	TTTATACATGTTTCATCCATT	2.11926e-05	NI-NG-NI-NN-NI-HD-NS-NS-NN-NG-HD-NS-HD-NN-HD-HD-HD-NI-NG-NG	TAL20Xam668
Manes.04G067000.3.v7.0;pacid=41314783	22	-	0.327778	TTTATACATGTTTCATCCATT	2.11926e-05	NI-NG-NI-NN-NI-HD-NS-NS-NN-NG-HD-NS-HD-NN-HD-HD-HD-NI-NG-NG	TAL20Xam668
Manes.04G067000.4.v7.0;pacid=41314784	22	-	0.327778	TTTATACATGTTTCATCCATT	2.11926e-05	NI-NG-NI-NN-NI-HD-NS-NS-NN-NG-HD-NS-HD-NN-HD-HD-HD-NI-NG-NG	TAL20Xam668
Manes.S064300.1.v7.0;pacid=41318199	261	-	0.327665	CATACACCACTCCTTCCCCTT	2.12903e-05	NI-NG-NI-NN-NI-HD-NS-NS-NN-NG-HD-NS-HD-NN-HD-HD-HD-NI-NG-NG	TAL20Xam668
Manes.05G169700.1.v7.0;pacid=41336962	47	+	0.327665	TACAGACAATTAGCTCTCATC	2.12905e-05	NI-NG-NI-NN-NI-HD-NS-NS-NN-NG-HD-NS-HD-NN-HD-HD-HD-NI-NG-NG	TAL20Xam668
Manes.15G044800.1.v7.0;pacid=41305299	206	+	0.327661	TACAGTAGAATCCAACCCATC	2.12937e-05	NI-NG-NI-NN-NI-HD-NS-NS-NN-NG-HD-NS-HD-NN-HD-HD-HD-NI-NG-NG	TAL20Xam668
Manes.06G163200.1.v7.0;pacid=41303341	86	+	0.327524	TATAAATTTGTATCAATCATT	2.1412e-05	NI-NG-NI-NN-NI-HD-NS-NS-NN-NG-HD-NS-HD-NN-HD-HD-HD-NI-NG-NG	TAL20Xam668
Manes.06G163200.2.v7.0;pacid=41303342	86	+	0.327524	TATAAATTTGTATCAATCATT	2.1412e-05	NI-NG-NI-NN-NI-HD-NS-NS-NN-NG-HD-NS-HD-NN-HD-HD-HD-NI-NG-NG	TAL20Xam668
Manes.15G026300.1.v7.0;pacid=41306889	188	-	0.327467	TCTGGACGCAACACACCCGTT	2.14612e-05	NI-NG-NI-NN-NI-HD-NS-NS-NN-NG-HD-NS-HD-NN-HD-HD-HD-NI-NG-NG	TAL20Xam668
Manes.15G026300.2.v7.0;pacid=41306890	188	-	0.327467	TCTGGACGCAACACACCCGTT	2.14612e-05	NI-NG-NI-NN-NI-HD-NS-NS-NN-NG-HD-NS-HD-NN-HD-HD-HD-NI-NG-NG	TAL20Xam668
Manes.05G167100.1.v7.0;pacid=41321042	180	+	0.327419	TTGCCACGTGTCTAACCCATT	2.15025e-05	NI-NG-NI-NN-NI-HD-NS-NS-NN-NG-HD-NS-HD-NN-HD-HD-HD-NI-NG-NG	TAL20Xam668
Manes.12G056400.1.v7.0;pacid=41322579	202	-	0.327408	AATATACATGTCAAGCCAATG	2.15123e-05	NI-NG-NI-NN-NI-HD-NS-NS-NN-NG-HD-NS-HD-NN-HD-HD-HD-NI-NG-NG	TAL20Xam668
Manes.14G156800.1.v7.0;pacid=41332947	328	+	0.327371	TATCGAACACTCTCACTCTTT	2.15447e-05	NI-NG-NI-NN-NI-HD-NS-NS-NN-NG-HD-NS-HD-NN-HD-HD-HD-NI-NG-NG	TAL20Xam668
Manes.14G156800.2.v7.0;pacid=41332948	328	+	0.327371	TATCGAACACTCTCACTCTTT	2.15447e-05	NI-NG-NI-NN-NI-HD-NS-NS-NN-NG-HD-NS-HD-NN-HD-HD-HD-NI-NG-NG	TAL20Xam668
Manes.14G156800.3.v7.0;pacid=41332949	328	+	0.327371	TATCGAACACTCTCACTCTTT	2.15447e-05	NI-NG-NI-NN-NI-HD-NS-NS-NN-NG-HD-NS-HD-NN-HD-HD-HD-NI-NG-NG	TAL20Xam668
Manes.13G071500.1.v7.0;pacid=41337679	156	-	0.327324	TATATACAAGTCCAGCACGTG	2.15855e-05	NI-NG-NI-NN-NI-HD-NS-NS-NN-NG-HD-NS-HD-NN-HD-HD-HD-NI-NG-NG	TAL20Xam668
Manes.08G024100.1.v7.0;pacid=41313411	82	+	0.327277	TATTGACCCTTCAATACCATA	2.16263e-05	NI-NG-NI-NN-NI-HD-NS-NS-NN-NG-HD-NS-HD-NN-HD-HD-HD-NI-NG-NG	TAL20Xam668
Manes.14G069100.1.v7.0;pacid=41332528	80	-	0.327267	TTCAGATGAATCGATCCCATT	2.16351e-05	NI-NG-NI-NN-NI-HD-NS-NS-NN-NG-HD-NS-HD-NN-HD-HD-HD-NI-NG-NG	TAL20Xam668
Manes.14G069100.2.v7.0;pacid=41332529	80	-	0.327267	TTCAGATGAATCGATCCCATT	2.16351e-05	NI-NG-NI-NN-NI-HD-NS-NS-NN-NG-HD-NS-HD-NN-HD-HD-HD-NI-NG-NG	TAL20Xam668
Manes.01G243200.1.v7.0;pacid=41325418	372	+	0.327229	TATAAGCACACCGCACACCTT	2.16691e-05	NI-NG-NI-NN-NI-HD-NS-NS-NN-NG-HD-NS-HD-NN-HD-HD-HD-NI-NG-NG	TAL20Xam668
Manes.01G243200.2.v7.0;pacid=41325419	188	+	0.327229	TATAAGCACACCGCACACCTT	2.16691e-05	NI-NG-NI-NN-NI-HD-NS-NS-NN-NG-HD-NS-HD-NN-HD-HD-HD-NI-NG-NG	TAL20Xam668
Manes.15G134500.1.v7.0;pacid=41306863	248	+	0.327004	TATACTCAAATCGTAAACATT	2.18668e-05	NI-NG-NI-NN-NI-HD-NS-NS-NN-NG-HD-NS-HD-NN-HD-HD-HD-NI-NG-NG	TAL20Xam668
Manes.01G097600.1.v7.0;pacid=41324425	116	+	0.326956	TTTCGAAAAATCTCCCTCATT	2.19087e-05	NI-NG-NI-NN-NI-HD-NS-NS-NN-NG-HD-NS-HD-NN-HD-HD-HD-NI-NG-NG	TAL20Xam668
Manes.06G128200.1.v7.0;pacid=41303477	56	-	0.326926	TATGGACAAGGCCCACCGGTT	2.19352e-05	NI-NG-NI-NN-NI-HD-NS-NS-NN-NG-HD-NS-HD-NN-HD-HD-HD-NI-NG-NG	TAL20Xam668
Manes.08G046100.1.v7.0;pacid=41312711	47	-	0.326926	TATAAACCTCTACCATGCATT	2.19355e-05	NI-NG-NI-NN-NI-HD-NS-NS-NN-NG-HD-NS-HD-NN-HD-HD-HD-NI-NG-NG	TAL20Xam668
Manes.08G046100.2.v7.0;pacid=41312712	47	-	0.326926	TATAAACCTCTACCATGCATT	2.19355e-05	NI-NG-NI-NN-NI-HD-NS-NS-NN-NG-HD-NS-HD-NN-HD-HD-HD-NI-NG-NG	TAL20Xam668
Manes.04G094000.1.v7.0;pacid=41315249	86	+	0.326888	CAGAGTCAACTCACTCCCTTT	2.19695e-05	NI-NG-NI-NN-NI-HD-NS-NS-NN-NG-HD-NS-HD-NN-HD-HD-HD-NI-NG-NG	TAL20Xam668
Manes.04G084700.1.v7.0;pacid=41315547	250	+	0.326847	GAAAAACCGGTAGCTACCATT	2.20058e-05	NI-NG-NI-NN-NI-HD-NS-NS-NN-NG-HD-NS-HD-NN-HD-HD-HD-NI-NG-NG	TAL20Xam668
Manes.08G062200.1.v7.0;pacid=41312458	179	-	0.326809	TATTCACGCGCCGCCACCATC	2.20391e-05	NI-NG-NI-NN-NI-HD-NS-NS-NN-NG-HD-NS-HD-NN-HD-HD-HD-NI-NG-NG	TAL20Xam668
Manes.10G047900.1.v7.0;pacid=41322139	170	-	0.326726	TATATACAGCTAAAAACCATG	2.21131e-05	NI-NG-NI-NN-NI-HD-NS-NS-NN-NG-HD-NS-HD-NN-HD-HD-HD-NI-NG-NG	TAL20Xam668
Manes.03G143700.1.v7.0;pacid=41307516	124	+	0.326717	AATAGACGCATATTATCCATT	2.21213e-05	NI-NG-NI-NN-NI-HD-NS-NS-NN-NG-HD-NS-HD-NN-HD-HD-HD-NI-NG-NG	TAL20Xam668
Manes.03G143700.2.v7.0;pacid=41307517	26	+	0.326717	AATAGACGCATATTATCCATT	2.21213e-05	NI-NG-NI-NN-NI-HD-NS-NS-NN-NG-HD-NS-HD-NN-HD-HD-HD-NI-NG-NG	TAL20Xam668
Manes.10G135800.1.v7.0;pacid=41321145	268	-	0.32664	ATCAGACAAATCCCACCAATT	2.21904e-05	NI-NG-NI-NN-NI-HD-NS-NS-NN-NG-HD-NS-HD-NN-HD-HD-HD-NI-NG-NG	TAL20Xam668
Manes.04G049400.1.v7.0;pacid=41315645	68	+	0.326637	TATAGCTGAGACTAACCCACT	2.21927e-05	NI-NG-NI-NN-NI-HD-NS-NS-NN-NG-HD-NS-HD-NN-HD-HD-HD-NI-NG-NG	TAL20Xam668
Manes.14G054200.1.v7.0;pacid=41331306	125	+	0.326623	TCCACACGCGTCGAGCCCACA	2.22051e-05	NI-NG-NI-NN-NI-HD-NS-NS-NN-NG-HD-NS-HD-NN-HD-HD-HD-NI-NG-NG	TAL20Xam668
Manes.03G025200.1.v7.0;pacid=41309518	147	-	0.326608	TATATACAGCCATAGCCCACT	2.22188e-05	NI-NG-NI-NN-NI-HD-NS-NS-NN-NG-HD-NS-HD-NN-HD-HD-HD-NI-NG-NG	TAL20Xam668
Manes.08G030100.1.v7.0;pacid=41312561	241	+	0.326591	TATAAACTTATCAAAAATATT	2.22345e-05	NI-NG-NI-NN-NI-HD-NS-NS-NN-NG-HD-NS-HD-NN-HD-HD-HD-NI-NG-NG	TAL20Xam668
Manes.02G165500.1.v7.0;pacid=41340237	158	+	0.326587	TACACACAATCCCAGCCCAAT	2.22374e-05	NI-NG-NI-NN-NI-HD-NS-NS-NN-NG-HD-NS-HD-NN-HD-HD-HD-NI-NG-NG	TAL20Xam668
Manes.13G086600.1.v7.0;pacid=41337310	114	+	0.326506	TCAAAACATGTCATATCCATT	2.23106e-05	NI-NG-NI-NN-NI-HD-NS-NS-NN-NG-HD-NS-HD-NN-HD-HD-HD-NI-NG-NG	TAL20Xam668
Manes.13G086600.2.v7.0;pacid=41337311	114	+	0.326506	TCAAAACATGTCATATCCATT	2.23106e-05	NI-NG-NI-NN-NI-HD-NS-NS-NN-NG-HD-NS-HD-NN-HD-HD-HD-NI-NG-NG	TAL20Xam668
Manes.09G099300.1.v7.0;pacid=41311852	159	+	0.326438	TTCAGAAAATTCCCACGCATT	2.23721e-05	NI-NG-NI-NN-NI-HD-NS-NS-NN-NG-HD-NS-HD-NN-HD-HD-HD-NI-NG-NG	TAL20Xam668
Manes.16G055100.2.v7.0;pacid=41319795	121	+	0.326314	TATATCTATATCTCTACCATT	2.24838e-05	NI-NG-NI-NN-NI-HD-NS-NS-NN-NG-HD-NS-HD-NN-HD-HD-HD-NI-NG-NG	TAL20Xam668
Manes.16G055100.5.v7.0;pacid=41319796	121	+	0.326314	TATATCTATATCTCTACCATT	2.24838e-05	NI-NG-NI-NN-NI-HD-NS-NS-NN-NG-HD-NS-HD-NN-HD-HD-HD-NI-NG-NG	TAL20Xam668
Manes.06G142600.1.v7.0;pacid=41304005	109	-	0.326309	TATAAGACAGCAACGCCCACT	2.24887e-05	NI-NG-NI-NN-NI-HD-NS-NS-NN-NG-HD-NS-HD-NN-HD-HD-HD-NI-NG-NG	TAL20Xam668
Manes.12G141000.1.v7.0;pacid=41322359	270	+	0.326305	AATATAATCATCAAAACCATT	2.24924e-05	NI-NG-NI-NN-NI-HD-NS-NS-NN-NG-HD-NS-HD-NN-HD-HD-HD-NI-NG-NG	TAL20Xam668
Manes.10G074500.1.v7.0;pacid=41321809	439	+	0.326295	TCTAAACTTTTTGCATCCATT	2.25012e-05	NI-NG-NI-NN-NI-HD-NS-NS-NN-NG-HD-NS-HD-NN-HD-HD-HD-NI-NG-NG	TAL20Xam668
Manes.08G067600.1.v7.0;pacid=41312350	210	+	0.326187	TATAACATCATCCCACCCCTC	2.25992e-05	NI-NG-NI-NN-NI-HD-NS-NS-NN-NG-HD-NS-HD-NN-HD-HD-HD-NI-NG-NG	TAL20Xam668
Manes.04G071200.1.v7.0;pacid=41315132	66	+	0.32618	CATCAATTGCTCGCACCCAAT	2.26055e-05	NI-NG-NI-NN-NI-HD-NS-NS-NN-NG-HD-NS-HD-NN-HD-HD-HD-NI-NG-NG	TAL20Xam668
Manes.02G167200.1.v7.0;pacid=41340157	10	+	0.326134	TATCATCCAATCCCGCCATTT	2.26479e-05	NI-NG-NI-NN-NI-HD-NS-NS-NN-NG-HD-NS-HD-NN-HD-HD-HD-NI-NG-NG	TAL20Xam668
Manes.09G159400.1.v7.0;pacid=41311334	107	+	0.326126	CGTAGACAATTAGAACCCAAT	2.26551e-05	NI-NG-NI-NN-NI-HD-NS-NS-NN-NG-HD-NS-HD-NN-HD-HD-HD-NI-NG-NG	TAL20Xam668
Manes.08G015100.3.v7.0;pacid=41313158	73	-	0.326057	TTTATACTTTTCACTTCCATT	2.27184e-05	NI-NG-NI-NN-NI-HD-NS-NS-NN-NG-HD-NS-HD-NN-HD-HD-HD-NI-NG-NG	TAL20Xam668
Manes.08G015100.4.v7.0;pacid=41313159	73	-	0.326057	TTTATACTTTTCACTTCCATT	2.27184e-05	NI-NG-NI-NN-NI-HD-NS-NS-NN-NG-HD-NS-HD-NN-HD-HD-HD-NI-NG-NG	TAL20Xam668
Manes.03G178700.1.v7.0;pacid=41308460	46	+	0.32583	TAAATACGGTTATCGGCCATT	2.29274e-05	NI-NG-NI-NN-NI-HD-NS-NS-NN-NG-HD-NS-HD-NN-HD-HD-HD-NI-NG-NG	TAL20Xam668
Manes.02G027300.1.v7.0;pacid=41341690	235	+	0.325776	TATTAACTAACACCACCAATT	2.29767e-05	NI-NG-NI-NN-NI-HD-NS-NS-NN-NG-HD-NS-HD-NN-HD-HD-HD-NI-NG-NG	TAL20Xam668
Manes.16G051900.1.v7.0;pacid=41318913	177	+	0.325754	TATTGAAAGCATAAGCCCATT	2.29972e-05	NI-NG-NI-NN-NI-HD-NS-NS-NN-NG-HD-NS-HD-NN-HD-HD-HD-NI-NG-NG	TAL20Xam668
Manes.17G053200.1.v7.0;pacid=41330634	170	+	0.325683	TAAAAAATCATCTCAACCAAT	2.30635e-05	NI-NG-NI-NN-NI-HD-NS-NS-NN-NG-HD-NS-HD-NN-HD-HD-HD-NI-NG-NG	TAL20Xam668
Manes.01G174500.1.v7.0;pacid=41325823	177	-	0.325497	TCTTGACAAGGGGCACCCATT	2.32361e-05	NI-NG-NI-NN-NI-HD-NS-NS-NN-NG-HD-NS-HD-NN-HD-HD-HD-NI-NG-NG	TAL20Xam668
Manes.04G076300.1.v7.0;pacid=41316190	237	+	0.325497	TTTAAAAAGGTCTCCCACTTT	2.32369e-05	NI-NG-NI-NN-NI-HD-NS-NS-NN-NG-HD-NS-HD-NN-HD-HD-HD-NI-NG-NG	TAL20Xam668
Manes.09G072000.1.v7.0;pacid=41310430	74	+	0.32547	TTTAGATAAAGCCCACCAATT	2.3262e-05	NI-NG-NI-NN-NI-HD-NS-NS-NN-NG-HD-NS-HD-NN-HD-HD-HD-NI-NG-NG	TAL20Xam668
Manes.09G072000.2.v7.0;pacid=41310431	86	+	0.32547	TTTAGATAAAGCCCACCAATT	2.3262e-05	NI-NG-NI-NN-NI-HD-NS-NS-NN-NG-HD-NS-HD-NN-HD-HD-HD-NI-NG-NG	TAL20Xam668
Manes.02G111200.1.v7.0;pacid=41340611	227	+	0.325284	CATAGCCACATCCCTTCTATT	2.34369e-05	NI-NG-NI-NN-NI-HD-NS-NS-NN-NG-HD-NS-HD-NN-HD-HD-HD-NI-NG-NG	TAL20Xam668
Manes.16G098100.1.v7.0;pacid=41318620	400	+	0.325212	TCTGGTCTGGTCTCGACCTTT	2.35046e-05	NI-NG-NI-NN-NI-HD-NS-NS-NN-NG-HD-NS-HD-NN-HD-HD-HD-NI-NG-NG	TAL20Xam668
Manes.15G163600.1.v7.0;pacid=41305604	234	+	0.325021	CATCAACCAAACACTCACATT	2.36864e-05	NI-NG-NI-NN-NI-HD-NS-NS-NN-NG-HD-NS-HD-NN-HD-HD-HD-NI-NG-NG	TAL20Xam668
Manes.05G163500.2.v7.0;pacid=41336222	255	-	0.325007	CATAAAAATGCCCAGCTCATT	2.36996e-05	NI-NG-NI-NN-NI-HD-NS-NS-NN-NG-HD-NS-HD-NN-HD-HD-HD-NI-NG-NG	TAL20Xam668
Manes.04G114300.1.v7.0;pacid=41316054	112	-	0.324923	TATATACACATTATACCAATT	2.37795e-05	NI-NG-NI-NN-NI-HD-NS-NS-NN-NG-HD-NS-HD-NN-HD-HD-HD-NI-NG-NG	TAL20Xam668
Manes.01G075700.1.v7.0;pacid=41325928	125	+	0.324894	CACAGACGTGTCAACCCCTTC	2.38074e-05	NI-NG-NI-NN-NI-HD-NS-NS-NN-NG-HD-NS-HD-NN-HD-HD-HD-NI-NG-NG	TAL20Xam668
Manes.11G071900.1.v7.0;pacid=41317718	18	+	0.324888	TAGAAACTGATCTCTCTAATT	2.38131e-05	NI-NG-NI-NN-NI-HD-NS-NS-NN-NG-HD-NS-HD-NN-HD-HD-HD-NI-NG-NG	TAL20Xam668
Manes.05G162600.1.v7.0;pacid=41336279	223	-	0.324884	AATATAAAGAACTAGCCCATT	2.38164e-05	NI-NG-NI-NN-NI-HD-NS-NS-NN-NG-HD-NS-HD-NN-HD-HD-HD-NI-NG-NG	TAL20Xam668
Manes.18G029200.1.v7.0;pacid=41334466	245	-	0.324884	AATATAAAGAACTAGCCCATT	2.38164e-05	NI-NG-NI-NN-NI-HD-NS-NS-NN-NG-HD-NS-HD-NN-HD-HD-HD-NI-NG-NG	TAL20Xam668
Manes.09G024400.1.v7.0;pacid=41311615	147	+	0.32488	GAGAAACAAATCACTCCCAAT	2.38205e-05	NI-NG-NI-NN-NI-HD-NS-NS-NN-NG-HD-NS-HD-NN-HD-HD-HD-NI-NG-NG	TAL20Xam668
Manes.S018400.1.v7.0;pacid=41339131	137	+	0.324864	TATAGATTACTAACACAGATT	2.38365e-05	NI-NG-NI-NN-NI-HD-NS-NS-NN-NG-HD-NS-HD-NN-HD-HD-HD-NI-NG-NG	TAL20Xam668
Manes.13G016100.1.v7.0;pacid=41338734	270	-	0.324763	TAAAGAAAAGCCTCGCACAGT	2.39326e-05	NI-NG-NI-NN-NI-HD-NS-NS-NN-NG-HD-NS-HD-NN-HD-HD-HD-NI-NG-NG	TAL20Xam668
Manes.13G016100.2.v7.0;pacid=41338735	270	-	0.324763	TAAAGAAAAGCCTCGCACAGT	2.39326e-05	NI-NG-NI-NN-NI-HD-NS-NS-NN-NG-HD-NS-HD-NN-HD-HD-HD-NI-NG-NG	TAL20Xam668
Manes.13G016100.3.v7.0;pacid=41338736	270	-	0.324763	TAAAGAAAAGCCTCGCACAGT	2.39326e-05	NI-NG-NI-NN-NI-HD-NS-NS-NN-NG-HD-NS-HD-NN-HD-HD-HD-NI-NG-NG	TAL20Xam668
Manes.10G120200.1.v7.0;pacid=41320498	14	+	0.324761	TATCACCATATACCACTCATT	2.39351e-05	NI-NG-NI-NN-NI-HD-NS-NS-NN-NG-HD-NS-HD-NN-HD-HD-HD-NI-NG-NG	TAL20Xam668
Manes.04G027100.1.v7.0;pacid=41316017	79	-	0.324664	TTAAAACGATTCAAGCACATT	2.40288e-05	NI-NG-NI-NN-NI-HD-NS-NS-NN-NG-HD-NS-HD-NN-HD-HD-HD-NI-NG-NG	TAL20Xam668
Manes.04G027100.12.v7.0;pacid=41316018	79	-	0.324664	TTAAAACGATTCAAGCACATT	2.40288e-05	NI-NG-NI-NN-NI-HD-NS-NS-NN-NG-HD-NS-HD-NN-HD-HD-HD-NI-NG-NG	TAL20Xam668
Manes.04G027100.14.v7.0;pacid=41316019	79	-	0.324664	TTAAAACGATTCAAGCACATT	2.40288e-05	NI-NG-NI-NN-NI-HD-NS-NS-NN-NG-HD-NS-HD-NN-HD-HD-HD-NI-NG-NG	TAL20Xam668
Manes.04G027100.16.v7.0;pacid=41316020	79	-	0.324664	TTAAAACGATTCAAGCACATT	2.40288e-05	NI-NG-NI-NN-NI-HD-NS-NS-NN-NG-HD-NS-HD-NN-HD-HD-HD-NI-NG-NG	TAL20Xam668
Manes.04G027100.10.v7.0;pacid=41316021	79	-	0.324664	TTAAAACGATTCAAGCACATT	2.40288e-05	NI-NG-NI-NN-NI-HD-NS-NS-NN-NG-HD-NS-HD-NN-HD-HD-HD-NI-NG-NG	TAL20Xam668
Manes.04G027100.19.v7.0;pacid=41316022	79	-	0.324664	TTAAAACGATTCAAGCACATT	2.40288e-05	NI-NG-NI-NN-NI-HD-NS-NS-NN-NG-HD-NS-HD-NN-HD-HD-HD-NI-NG-NG	TAL20Xam668
Manes.04G027100.21.v7.0;pacid=41316023	79	-	0.324664	TTAAAACGATTCAAGCACATT	2.40288e-05	NI-NG-NI-NN-NI-HD-NS-NS-NN-NG-HD-NS-HD-NN-HD-HD-HD-NI-NG-NG	TAL20Xam668
Manes.04G027100.23.v7.0;pacid=41316024	79	-	0.324664	TTAAAACGATTCAAGCACATT	2.40288e-05	NI-NG-NI-NN-NI-HD-NS-NS-NN-NG-HD-NS-HD-NN-HD-HD-HD-NI-NG-NG	TAL20Xam668
Manes.04G027100.25.v7.0;pacid=41316025	79	-	0.324664	TTAAAACGATTCAAGCACATT	2.40288e-05	NI-NG-NI-NN-NI-HD-NS-NS-NN-NG-HD-NS-HD-NN-HD-HD-HD-NI-NG-NG	TAL20Xam668
Manes.10G012500.1.v7.0;pacid=41321015	3	+	0.324661	TATAAATATTTTGCATCCATT	2.40314e-05	NI-NG-NI-NN-NI-HD-NS-NS-NN-NG-HD-NS-HD-NN-HD-HD-HD-NI-NG-NG	TAL20Xam668
Manes.10G005900.1.v7.0;pacid=41321311	54	-	0.324645	TATAAAAAAAAAACCCCAATT	2.40467e-05	NI-NG-NI-NN-NI-HD-NS-NS-NN-NG-HD-NS-HD-NN-HD-HD-HD-NI-NG-NG	TAL20Xam668
Manes.10G005900.2.v7.0;pacid=41321312	135	-	0.324645	TATAAAAAAAAAACCCCAATT	2.40467e-05	NI-NG-NI-NN-NI-HD-NS-NS-NN-NG-HD-NS-HD-NN-HD-HD-HD-NI-NG-NG	TAL20Xam668
Manes.08G121300.1.v7.0;pacid=41313827	267	-	0.324626	TAAAAACAAGTTGGGACCATT	2.40648e-05	NI-NG-NI-NN-NI-HD-NS-NS-NN-NG-HD-NS-HD-NN-HD-HD-HD-NI-NG-NG	TAL20Xam668
Manes.18G097900.1.v7.0;pacid=41334102	274	-	0.324575	TATAACCAAGCAAAACCCATA	2.4115e-05	NI-NG-NI-NN-NI-HD-NS-NS-NN-NG-HD-NS-HD-NN-HD-HD-HD-NI-NG-NG	TAL20Xam668
Manes.06G081600.1.v7.0;pacid=41304396	74	+	0.324366	CATAGACATGACACATACATA	2.43178e-05	NI-NG-NI-NN-NI-HD-NS-NS-NN-NG-HD-NS-HD-NN-HD-HD-HD-NI-NG-NG	TAL20Xam668
Manes.01G255700.1.v7.0;pacid=41325554	67	-	0.324309	TAAAGACATAAATCTACCATT	2.43731e-05	NI-NG-NI-NN-NI-HD-NS-NS-NN-NG-HD-NS-HD-NN-HD-HD-HD-NI-NG-NG	TAL20Xam668
Manes.16G064900.1.v7.0;pacid=41319573	100	+	0.324222	TCTACACGCATCTAACCAATC	2.44588e-05	NI-NG-NI-NN-NI-HD-NS-NS-NN-NG-HD-NS-HD-NN-HD-HD-HD-NI-NG-NG	TAL20Xam668
Manes.04G117000.2.v7.0;pacid=41315963	281	-	0.324148	TATAGACGAGAATAACACTTT	2.45313e-05	NI-NG-NI-NN-NI-HD-NS-NS-NN-NG-HD-NS-HD-NN-HD-HD-HD-NI-NG-NG	TAL20Xam668
Manes.01G001900.4.v7.0;pacid=41327351	206	-	0.324066	TATATTAAATTCACTCCAATT	2.46126e-05	NI-NG-NI-NN-NI-HD-NS-NS-NN-NG-HD-NS-HD-NN-HD-HD-HD-NI-NG-NG	TAL20Xam668
Manes.01G001900.3.v7.0;pacid=41327352	206	-	0.324066	TATATTAAATTCACTCCAATT	2.46126e-05	NI-NG-NI-NN-NI-HD-NS-NS-NN-NG-HD-NS-HD-NN-HD-HD-HD-NI-NG-NG	TAL20Xam668
Manes.01G024100.1.v7.0;pacid=41327401	212	+	0.32404	TATAGCCTCTTATCACCAACT	2.46384e-05	NI-NG-NI-NN-NI-HD-NS-NS-NN-NG-HD-NS-HD-NN-HD-HD-HD-NI-NG-NG	TAL20Xam668
Manes.08G082500.1.v7.0;pacid=41313579	159	+	0.323935	AATAGAAAGATCATGATCATT	2.47426e-05	NI-NG-NI-NN-NI-HD-NS-NS-NN-NG-HD-NS-HD-NN-HD-HD-HD-NI-NG-NG	TAL20Xam668
Manes.13G036300.1.v7.0;pacid=41338863	209	+	0.323927	AATTATATAGTAACGCCCATT	2.47506e-05	NI-NG-NI-NN-NI-HD-NS-NS-NN-NG-HD-NS-HD-NN-HD-HD-HD-NI-NG-NG	TAL20Xam668
Manes.08G024900.1.v7.0;pacid=41313142	144	+	0.323872	TCTACTAACACCCCACCCATT	2.48047e-05	NI-NG-NI-NN-NI-HD-NS-NS-NN-NG-HD-NS-HD-NN-HD-HD-HD-NI-NG-NG	TAL20Xam668
Manes.02G081900.1.v7.0;pacid=41340266	70	-	0.323839	CAAAGTCAGATAACACCCAAT	2.48377e-05	NI-NG-NI-NN-NI-HD-NS-NS-NN-NG-HD-NS-HD-NN-HD-HD-HD-NI-NG-NG	TAL20Xam668
Manes.02G081900.2.v7.0;pacid=41340267	70	-	0.323839	CAAAGTCAGATAACACCCAAT	2.48377e-05	NI-NG-NI-NN-NI-HD-NS-NS-NN-NG-HD-NS-HD-NN-HD-HD-HD-NI-NG-NG	TAL20Xam668
Manes.05G198500.1.v7.0;pacid=41335659	274	+	0.323799	TACAAACACATACCACTCAAT	2.48773e-05	NI-NG-NI-NN-NI-HD-NS-NS-NN-NG-HD-NS-HD-NN-HD-HD-HD-NI-NG-NG	TAL20Xam668
Manes.01G197100.1.v7.0;pacid=41324348	166	-	0.323776	TCTATACAGCTCCCTCCCAAC	2.49003e-05	NI-NG-NI-NN-NI-HD-NS-NS-NN-NG-HD-NS-HD-NN-HD-HD-HD-NI-NG-NG	TAL20Xam668
Manes.17G025900.1.v7.0;pacid=41330589	405	+	0.323728	TACCCACCAACCACACCCATC	2.49482e-05	NI-NG-NI-NN-NI-HD-NS-NS-NN-NG-HD-NS-HD-NN-HD-HD-HD-NI-NG-NG	TAL20Xam668
Manes.01G035100.1.v7.0;pacid=41324484	82	+	0.323651	TTAGGAAAAGTTGCACCCATT	2.50261e-05	NI-NG-NI-NN-NI-HD-NS-NS-NN-NG-HD-NS-HD-NN-HD-HD-HD-NI-NG-NG	TAL20Xam668
Manes.01G035100.2.v7.0;pacid=41324485	92	+	0.323651	TTAGGAAAAGTTGCACCCATT	2.50261e-05	NI-NG-NI-NN-NI-HD-NS-NS-NN-NG-HD-NS-HD-NN-HD-HD-HD-NI-NG-NG	TAL20Xam668
Manes.06G113000.1.v7.0;pacid=41303841	1	+	0.323601	TCCATACAGCTCCTTCCCATT	2.50762e-05	NI-NG-NI-NN-NI-HD-NS-NS-NN-NG-HD-NS-HD-NN-HD-HD-HD-NI-NG-NG	TAL20Xam668
Manes.10G093500.1.v7.0;pacid=41321105	68	+	0.323559	TATAAAAAAGTAAATCCAATA	2.51181e-05	NI-NG-NI-NN-NI-HD-NS-NS-NN-NG-HD-NS-HD-NN-HD-HD-HD-NI-NG-NG	TAL20Xam668
Manes.10G093500.2.v7.0;pacid=41321106	68	+	0.323559	TATAAAAAAGTAAATCCAATA	2.51181e-05	NI-NG-NI-NN-NI-HD-NS-NS-NN-NG-HD-NS-HD-NN-HD-HD-HD-NI-NG-NG	TAL20Xam668
Manes.14G133900.1.v7.0;pacid=41332778	269	+	0.323502	TCTATAATTATCACCCGCATT	2.51753e-05	NI-NG-NI-NN-NI-HD-NS-NS-NN-NG-HD-NS-HD-NN-HD-HD-HD-NI-NG-NG	TAL20Xam668
Manes.03G080400.1.v7.0;pacid=41307391	429	-	0.323483	TCTAGACATCTCTCCTCGATT	2.51953e-05	NI-NG-NI-NN-NI-HD-NS-NS-NN-NG-HD-NS-HD-NN-HD-HD-HD-NI-NG-NG	TAL20Xam668
Manes.02G065200.1.v7.0;pacid=41341392	401	+	0.323461	AACAGACTAGTCAAACAAATT	2.52172e-05	NI-NG-NI-NN-NI-HD-NS-NS-NN-NG-HD-NS-HD-NN-HD-HD-HD-NI-NG-NG	TAL20Xam668
Manes.06G005000.1.v7.0;pacid=41304484	191	+	0.323422	TCTAAGCCTTTCTCATCCATT	2.52571e-05	NI-NG-NI-NN-NI-HD-NS-NS-NN-NG-HD-NS-HD-NN-HD-HD-HD-NI-NG-NG	TAL20Xam668
Manes.S049200.1.v7.0;pacid=41320367	262	+	0.323329	TATAGACACACAGAGCTCGTT	2.53513e-05	NI-NG-NI-NN-NI-HD-NS-NS-NN-NG-HD-NS-HD-NN-HD-HD-HD-NI-NG-NG	TAL20Xam668
Manes.S049300.1.v7.0;pacid=41320364	262	+	0.323329	TATAGACACACAGAGCTCGTT	2.53513e-05	NI-NG-NI-NN-NI-HD-NS-NS-NN-NG-HD-NS-HD-NN-HD-HD-HD-NI-NG-NG	TAL20Xam668
Manes.10G141100.1.v7.0;pacid=41320758	232	-	0.32326	TAAAGATAAATCGCACGCATA	2.54215e-05	NI-NG-NI-NN-NI-HD-NS-NS-NN-NG-HD-NS-HD-NN-HD-HD-HD-NI-NG-NG	TAL20Xam668
Manes.01G088800.5.v7.0;pacid=41327428	151	-	0.323259	TAAATACTGATCACTCCAACT	2.54223e-05	NI-NG-NI-NN-NI-HD-NS-NS-NN-NG-HD-NS-HD-NN-HD-HD-HD-NI-NG-NG	TAL20Xam668
Manes.11G066600.1.v7.0;pacid=41318388	73	+	0.323254	GAAAAAAGAGTCCCACTCATT	2.54274e-05	NI-NG-NI-NN-NI-HD-NS-NS-NN-NG-HD-NS-HD-NN-HD-HD-HD-NI-NG-NG	TAL20Xam668
Manes.04G016600.1.v7.0;pacid=41315731	134	+	0.323229	TATAGTCCAATCATTACTATT	2.54525e-05	NI-NG-NI-NN-NI-HD-NS-NS-NN-NG-HD-NS-HD-NN-HD-HD-HD-NI-NG-NG	TAL20Xam668
Manes.15G188400.1.v7.0;pacid=41305834	178	+	0.323216	TAGAGCCAATACACACTCATT	2.5466e-05	NI-NG-NI-NN-NI-HD-NS-NS-NN-NG-HD-NS-HD-NN-HD-HD-HD-NI-NG-NG	TAL20Xam668
Manes.07G137000.1.v7.0;pacid=41327806	213	+	0.323107	TTTGGACTACTTCCGCACATT	2.55776e-05	NI-NG-NI-NN-NI-HD-NS-NS-NN-NG-HD-NS-HD-NN-HD-HD-HD-NI-NG-NG	TAL20Xam668
Manes.15G033800.1.v7.0;pacid=41306625	234	+	0.323027	TATACACCTTTACTACTCATT	2.56597e-05	NI-NG-NI-NN-NI-HD-NS-NS-NN-NG-HD-NS-HD-NN-HD-HD-HD-NI-NG-NG	TAL20Xam668
Manes.10G061000.1.v7.0;pacid=41321930	218	+	0.322978	TCTAACCCAGTACCAACCAAT	2.57103e-05	NI-NG-NI-NN-NI-HD-NS-NS-NN-NG-HD-NS-HD-NN-HD-HD-HD-NI-NG-NG	TAL20Xam668
Manes.09G175500.1.v7.0;pacid=41310132	12	+	0.322975	TAAATTCTTTTCATGCCCATT	2.57135e-05	NI-NG-NI-NN-NI-HD-NS-NS-NN-NG-HD-NS-HD-NN-HD-HD-HD-NI-NG-NG	TAL20Xam668
Manes.13G057100.1.v7.0;pacid=41338999	145	+	0.322942	TATAGAGAAATGACTACCATT	2.57476e-05	NI-NG-NI-NN-NI-HD-NS-NS-NN-NG-HD-NS-HD-NN-HD-HD-HD-NI-NG-NG	TAL20Xam668
Manes.03G055500.1.v7.0;pacid=41308906	119	+	0.322926	TATAGTCAAATAACGCAATTT	2.57639e-05	NI-NG-NI-NN-NI-HD-NS-NS-NN-NG-HD-NS-HD-NN-HD-HD-HD-NI-NG-NG	TAL20Xam668
Manes.03G055500.2.v7.0;pacid=41308907	119	+	0.322926	TATAGTCAAATAACGCAATTT	2.57639e-05	NI-NG-NI-NN-NI-HD-NS-NS-NN-NG-HD-NS-HD-NN-HD-HD-HD-NI-NG-NG	TAL20Xam668
Manes.11G075800.1.v7.0;pacid=41316685	260	+	0.322922	GATAAAACTATCAAGCCCAAT	2.57679e-05	NI-NG-NI-NN-NI-HD-NS-NS-NN-NG-HD-NS-HD-NN-HD-HD-HD-NI-NG-NG	TAL20Xam668
Manes.10G009800.1.v7.0;pacid=41321688	248	+	0.322872	AACACAAAAATCACCACCATT	2.58191e-05	NI-NG-NI-NN-NI-HD-NS-NS-NN-NG-HD-NS-HD-NN-HD-HD-HD-NI-NG-NG	TAL20Xam668
Manes.02G213500.1.v7.0;pacid=41340897	103	+	0.322869	CATATTCATGTCAAGATCATT	2.58222e-05	NI-NG-NI-NN-NI-HD-NS-NS-NN-NG-HD-NS-HD-NN-HD-HD-HD-NI-NG-NG	TAL20Xam668
Manes.02G021300.1.v7.0;pacid=41339742	152	-	0.322867	TATGAACCAATAACACCAATA	2.58243e-05	NI-NG-NI-NN-NI-HD-NS-NS-NN-NG-HD-NS-HD-NN-HD-HD-HD-NI-NG-NG	TAL20Xam668
Manes.09G127000.1.v7.0;pacid=41312129	133	+	0.3228	TATGCATAACTCACTCCCTTT	2.58944e-05	NI-NG-NI-NN-NI-HD-NS-NS-NN-NG-HD-NS-HD-NN-HD-HD-HD-NI-NG-NG	TAL20Xam668
Manes.01G115700.1.v7.0;pacid=41325407	62	+	0.322775	TCAAAACATTGCAAGCCCATT	2.592e-05	NI-NG-NI-NN-NI-HD-NS-NS-NN-NG-HD-NS-HD-NN-HD-HD-HD-NI-NG-NG	TAL20Xam668
Manes.11G102700.1.v7.0;pacid=41318237	239	+	0.322711	AATGGCCTAGGCCAGCCCATT	2.59864e-05	NI-NG-NI-NN-NI-HD-NS-NS-NN-NG-HD-NS-HD-NN-HD-HD-HD-NI-NG-NG	TAL20Xam668
Manes.07G141400.1.v7.0;pacid=41329034	204	+	0.322693	AATAATCTAATCTTTCCCATT	2.60046e-05	NI-NG-NI-NN-NI-HD-NS-NS-NN-NG-HD-NS-HD-NN-HD-HD-HD-NI-NG-NG	TAL20Xam668
Manes.02G041800.1.v7.0;pacid=41341041	243	+	0.322609	TACACACGCCTCCTCCCCAAT	2.60929e-05	NI-NG-NI-NN-NI-HD-NS-NS-NN-NG-HD-NS-HD-NN-HD-HD-HD-NI-NG-NG	TAL20Xam668
Manes.15G111700.1.v7.0;pacid=41306722	248	-	0.322576	TATATAATAATATAGCCCTTT	2.61269e-05	NI-NG-NI-NN-NI-HD-NS-NS-NN-NG-HD-NS-HD-NN-HD-HD-HD-NI-NG-NG	TAL20Xam668
Manes.02G119300.2.v7.0;pacid=41340366	335	-	0.322559	CAAAGAAAATTCCAGCCAATT	2.61448e-05	NI-NG-NI-NN-NI-HD-NS-NS-NN-NG-HD-NS-HD-NN-HD-HD-HD-NI-NG-NG	TAL20Xam668
Manes.08G169500.1.v7.0;pacid=41312670	80	-	0.322474	TAAAGAAAAAGAAAACCCATT	2.62336e-05	NI-NG-NI-NN-NI-HD-NS-NS-NN-NG-HD-NS-HD-NN-HD-HD-HD-NI-NG-NG	TAL20Xam668
Manes.08G169500.2.v7.0;pacid=41312671	80	-	0.322474	TAAAGAAAAAGAAAACCCATT	2.62336e-05	NI-NG-NI-NN-NI-HD-NS-NS-NN-NG-HD-NS-HD-NN-HD-HD-HD-NI-NG-NG	TAL20Xam668
Manes.02G021100.1.v7.0;pacid=41339251	187	+	0.322466	TATCATCAGATCCGTCCCATT	2.62421e-05	NI-NG-NI-NN-NI-HD-NS-NS-NN-NG-HD-NS-HD-NN-HD-HD-HD-NI-NG-NG	TAL20Xam668
Manes.02G021100.2.v7.0;pacid=41339252	147	+	0.322466	TATCATCAGATCCGTCCCATT	2.62421e-05	NI-NG-NI-NN-NI-HD-NS-NS-NN-NG-HD-NS-HD-NN-HD-HD-HD-NI-NG-NG	TAL20Xam668
Manes.09G011900.1.v7.0;pacid=41310873	57	+	0.322465	TATCAAAATGTCTAAAACATT	2.62435e-05	NI-NG-NI-NN-NI-HD-NS-NS-NN-NG-HD-NS-HD-NN-HD-HD-HD-NI-NG-NG	TAL20Xam668
Manes.S007200.1.v7.0;pacid=41312152	95	+	0.322465	TATCAAAATGTCTAAAACATT	2.62435e-05	NI-NG-NI-NN-NI-HD-NS-NS-NN-NG-HD-NS-HD-NN-HD-HD-HD-NI-NG-NG	TAL20Xam668
Manes.15G103900.1.v7.0;pacid=41306473	247	+	0.322331	TATAAATAGATCCAACTCAAT	2.63842e-05	NI-NG-NI-NN-NI-HD-NS-NS-NN-NG-HD-NS-HD-NN-HD-HD-HD-NI-NG-NG	TAL20Xam668
Manes.10G149600.1.v7.0;pacid=41321013	265	+	0.322324	CATGCACATCTCGTGCCAATT	2.63921e-05	NI-NG-NI-NN-NI-HD-NS-NS-NN-NG-HD-NS-HD-NN-HD-HD-HD-NI-NG-NG	TAL20Xam668
Manes.14G104600.1.v7.0;pacid=41331163	217	-	0.322281	TATATATATGTTGCGGCCATT	2.64376e-05	NI-NG-NI-NN-NI-HD-NS-NS-NN-NG-HD-NS-HD-NN-HD-HD-HD-NI-NG-NG	TAL20Xam668
Manes.01G034300.1.v7.0;pacid=41324635	4	-	0.322229	TGTATACATGCCCCTTCCATT	2.64919e-05	NI-NG-NI-NN-NI-HD-NS-NS-NN-NG-HD-NS-HD-NN-HD-HD-HD-NI-NG-NG	TAL20Xam668
Manes.02G043100.1.v7.0;pacid=41340927	34	-	0.322044	TGTGGACAGAGCTTGCCCATT	2.66889e-05	NI-NG-NI-NN-NI-HD-NS-NS-NN-NG-HD-NS-HD-NN-HD-HD-HD-NI-NG-NG	TAL20Xam668
Manes.09G045600.1.v7.0;pacid=41310339	170	+	0.321924	AATAAATAAATAAATCCCATT	2.68171e-05	NI-NG-NI-NN-NI-HD-NS-NS-NN-NG-HD-NS-HD-NN-HD-HD-HD-NI-NG-NG	TAL20Xam668
Manes.09G045600.2.v7.0;pacid=41310340	170	+	0.321924	AATAAATAAATAAATCCCATT	2.68171e-05	NI-NG-NI-NN-NI-HD-NS-NS-NN-NG-HD-NS-HD-NN-HD-HD-HD-NI-NG-NG	TAL20Xam668
Manes.09G045600.3.v7.0;pacid=41310341	170	+	0.321924	AATAAATAAATAAATCCCATT	2.68171e-05	NI-NG-NI-NN-NI-HD-NS-NS-NN-NG-HD-NS-HD-NN-HD-HD-HD-NI-NG-NG	TAL20Xam668
Manes.09G045600.4.v7.0;pacid=41310342	170	+	0.321924	AATAAATAAATAAATCCCATT	2.68171e-05	NI-NG-NI-NN-NI-HD-NS-NS-NN-NG-HD-NS-HD-NN-HD-HD-HD-NI-NG-NG	TAL20Xam668
Manes.18G030500.1.v7.0;pacid=41334409	154	+	0.321912	TGTTGACCAAGCTCACCCATA	2.68302e-05	NI-NG-NI-NN-NI-HD-NS-NS-NN-NG-HD-NS-HD-NN-HD-HD-HD-NI-NG-NG	TAL20Xam668
Manes.04G003600.1.v7.0;pacid=41315375	34	-	0.321903	TGTAAACGAATCAAACCATTT	2.68402e-05	NI-NG-NI-NN-NI-HD-NS-NS-NN-NG-HD-NS-HD-NN-HD-HD-HD-NI-NG-NG	TAL20Xam668
Manes.01G025200.1.v7.0;pacid=41325328	147	-	0.321889	TATACAATGGTTGCACCTAAT	2.68544e-05	NI-NG-NI-NN-NI-HD-NS-NS-NN-NG-HD-NS-HD-NN-HD-HD-HD-NI-NG-NG	TAL20Xam668
Manes.04G010000.1.v7.0;pacid=41315262	109	-	0.32186	CATAAACATGTAGAACCTATC	2.68857e-05	NI-NG-NI-NN-NI-HD-NS-NS-NN-NG-HD-NS-HD-NN-HD-HD-HD-NI-NG-NG	TAL20Xam668
Manes.17G018600.1.v7.0;pacid=41330012	154	+	0.321822	TACAGTCGTTTCTCGTCCCTT	2.69268e-05	NI-NG-NI-NN-NI-HD-NS-NS-NN-NG-HD-NS-HD-NN-HD-HD-HD-NI-NG-NG	TAL20Xam668
Manes.08G038900.1.v7.0;pacid=41314054	178	+	0.321733	CAAACACCCCCCCAACCCATT	2.70226e-05	NI-NG-NI-NN-NI-HD-NS-NS-NN-NG-HD-NS-HD-NN-HD-HD-HD-NI-NG-NG	TAL20Xam668
Manes.08G038900.2.v7.0;pacid=41314055	178	+	0.321733	CAAACACCCCCCCAACCCATT	2.70226e-05	NI-NG-NI-NN-NI-HD-NS-NS-NN-NG-HD-NS-HD-NN-HD-HD-HD-NI-NG-NG	TAL20Xam668
Manes.02G021600.1.v7.0;pacid=41341699	124	-	0.321706	CACAAGCGCGCCACGCCCACT	2.70524e-05	NI-NG-NI-NN-NI-HD-NS-NS-NN-NG-HD-NS-HD-NN-HD-HD-HD-NI-NG-NG	TAL20Xam668
Manes.05G164500.1.v7.0;pacid=41336480	278	+	0.321598	TACAGCAAGCTAGCACTCATT	2.71688e-05	NI-NG-NI-NN-NI-HD-NS-NS-NN-NG-HD-NS-HD-NN-HD-HD-HD-NI-NG-NG	TAL20Xam668
Manes.16G002800.1.v7.0;pacid=41319234	10	+	0.321546	TCTAAATGGGCCAAGTCCATT	2.72253e-05	NI-NG-NI-NN-NI-HD-NS-NS-NN-NG-HD-NS-HD-NN-HD-HD-HD-NI-NG-NG	TAL20Xam668
Manes.02G017500.1.v7.0;pacid=41341352	121	-	0.321528	TATATACGAGCCTAACACTTT	2.72445e-05	NI-NG-NI-NN-NI-HD-NS-NS-NN-NG-HD-NS-HD-NN-HD-HD-HD-NI-NG-NG	TAL20Xam668
Manes.01G057200.1.v7.0;pacid=41324970	141	-	0.321465	TATTGGCATGTCTCTCCCCAT	2.7314e-05	NI-NG-NI-NN-NI-HD-NS-NS-NN-NG-HD-NS-HD-NN-HD-HD-HD-NI-NG-NG	TAL20Xam668
Manes.04G039400.1.v7.0;pacid=41315791	317	+	0.321458	TATTCACATGTAAAAACCATA	2.73213e-05	NI-NG-NI-NN-NI-HD-NS-NS-NN-NG-HD-NS-HD-NN-HD-HD-HD-NI-NG-NG	TAL20Xam668
Manes.01G076500.1.v7.0;pacid=41326496	24	+	0.321385	TATAGTCTTGTCAAGTCAAAT	2.74009e-05	NI-NG-NI-NN-NI-HD-NS-NS-NN-NG-HD-NS-HD-NN-HD-HD-HD-NI-NG-NG	TAL20Xam668
Manes.15G094200.1.v7.0;pacid=41306913	260	+	0.321293	TATATACCAACCAAACCCAAA	2.75022e-05	NI-NG-NI-NN-NI-HD-NS-NS-NN-NG-HD-NS-HD-NN-HD-HD-HD-NI-NG-NG	TAL20Xam668
Manes.15G094300.1.v7.0;pacid=41306962	260	+	0.321293	TATATACCAACCAAACCCAAA	2.75022e-05	NI-NG-NI-NN-NI-HD-NS-NS-NN-NG-HD-NS-HD-NN-HD-HD-HD-NI-NG-NG	TAL20Xam668
Manes.08G147900.1.v7.0;pacid=41313079	261	+	0.321283	TACATACAAAACGACACCATT	2.75126e-05	NI-NG-NI-NN-NI-HD-NS-NS-NN-NG-HD-NS-HD-NN-HD-HD-HD-NI-NG-NG	TAL20Xam668
Manes.07G045400.1.v7.0;pacid=41328593	61	+	0.321277	TTTCGACTGGTAACACCGATC	2.75189e-05	NI-NG-NI-NN-NI-HD-NS-NS-NN-NG-HD-NS-HD-NN-HD-HD-HD-NI-NG-NG	TAL20Xam668
Manes.13G058200.1.v7.0;pacid=41338111	154	+	0.321199	TATAAATGGGCCTAGATCATT	2.76053e-05	NI-NG-NI-NN-NI-HD-NS-NS-NN-NG-HD-NS-HD-NN-HD-HD-HD-NI-NG-NG	TAL20Xam668
Manes.04G061500.1.v7.0;pacid=41337103	211	+	0.321134	AATACAAGTCTCTCTCTCATT	2.76767e-05	NI-NG-NI-NN-NI-HD-NS-NS-NN-NG-HD-NS-HD-NN-HD-HD-HD-NI-NG-NG	TAL20Xam668
Manes.01G063000.1.v7.0;pacid=41327032	167	-	0.321102	TATAAAAATGTATAAACCAAT	2.77125e-05	NI-NG-NI-NN-NI-HD-NS-NS-NN-NG-HD-NS-HD-NN-HD-HD-HD-NI-NG-NG	TAL20Xam668
Manes.09G025500.1.v7.0;pacid=41311618	123	-	0.321087	TATATACGTATCTTGCTCATG	2.77283e-05	NI-NG-NI-NN-NI-HD-NS-NS-NN-NG-HD-NS-HD-NN-HD-HD-HD-NI-NG-NG	TAL20Xam668
Manes.12G047600.1.v7.0;pacid=41323299	211	-	0.321035	TTTTGAAAAGGCCCAACCATT	2.77867e-05	NI-NG-NI-NN-NI-HD-NS-NS-NN-NG-HD-NS-HD-NN-HD-HD-HD-NI-NG-NG	TAL20Xam668
Manes.09G106400.1.v7.0;pacid=41311430	229	+	0.320996	TTTAGTCATGGCAAGTCCATT	2.78296e-05	NI-NG-NI-NN-NI-HD-NS-NS-NN-NG-HD-NS-HD-NN-HD-HD-HD-NI-NG-NG	TAL20Xam668
Manes.08G111900.1.v7.0;pacid=41313773	115	+	0.320963	TATACACGATTAAAACCAGTT	2.7866e-05	NI-NG-NI-NN-NI-HD-NS-NS-NN-NG-HD-NS-HD-NN-HD-HD-HD-NI-NG-NG	TAL20Xam668
Manes.03G159100.1.v7.0;pacid=41307777	268	+	0.320942	TATAAAAGGGTACCAATGATT	2.78891e-05	NI-NG-NI-NN-NI-HD-NS-NS-NN-NG-HD-NS-HD-NN-HD-HD-HD-NI-NG-NG	TAL20Xam668
Manes.08G158600.1.v7.0;pacid=41312791	237	+	0.320941	TACAGAACTATCTTCACCATT	2.7891e-05	NI-NG-NI-NN-NI-HD-NS-NS-NN-NG-HD-NS-HD-NN-HD-HD-HD-NI-NG-NG	TAL20Xam668
Manes.08G158700.1.v7.0;pacid=41312522	235	+	0.320941	TACAGAACTATCTTCACCATT	2.7891e-05	NI-NG-NI-NN-NI-HD-NS-NS-NN-NG-HD-NS-HD-NN-HD-HD-HD-NI-NG-NG	TAL20Xam668
Manes.02G037100.1.v7.0;pacid=41339743	30	+	0.320924	CATAAACATACCATATCCATT	2.79092e-05	NI-NG-NI-NN-NI-HD-NS-NS-NN-NG-HD-NS-HD-NN-HD-HD-HD-NI-NG-NG	TAL20Xam668
Manes.12G101900.1.v7.0;pacid=41322818	251	+	0.320921	TAAAAACAATTCAATACCATC	2.79127e-05	NI-NG-NI-NN-NI-HD-NS-NS-NN-NG-HD-NS-HD-NN-HD-HD-HD-NI-NG-NG	TAL20Xam668
Manes.12G101900.2.v7.0;pacid=41322819	251	+	0.320921	TAAAAACAATTCAATACCATC	2.79127e-05	NI-NG-NI-NN-NI-HD-NS-NS-NN-NG-HD-NS-HD-NN-HD-HD-HD-NI-NG-NG	TAL20Xam668
Manes.12G101900.3.v7.0;pacid=41322820	251	+	0.320921	TAAAAACAATTCAATACCATC	2.79127e-05	NI-NG-NI-NN-NI-HD-NS-NS-NN-NG-HD-NS-HD-NN-HD-HD-HD-NI-NG-NG	TAL20Xam668
Manes.03G118600.1.v7.0;pacid=41308580	175	+	0.320903	TTTCGAAGTCTCCCTCCCATA	2.79333e-05	NI-NG-NI-NN-NI-HD-NS-NS-NN-NG-HD-NS-HD-NN-HD-HD-HD-NI-NG-NG	TAL20Xam668
Manes.03G119100.1.v7.0;pacid=41307700	155	+	0.320903	TTTCGAAGTCTCCCTCCCATA	2.79333e-05	NI-NG-NI-NN-NI-HD-NS-NS-NN-NG-HD-NS-HD-NN-HD-HD-HD-NI-NG-NG	TAL20Xam668
Manes.01G144400.1.v7.0;pacid=41326440	182	-	0.3209	CAGAGACACGTACCGTCTATT	2.79365e-05	NI-NG-NI-NN-NI-HD-NS-NS-NN-NG-HD-NS-HD-NN-HD-HD-HD-NI-NG-NG	TAL20Xam668
Manes.11G035700.1.v7.0;pacid=41317169	325	-	0.320893	CAAAGAAATTTCGAGCCCAAT	2.79443e-05	NI-NG-NI-NN-NI-HD-NS-NS-NN-NG-HD-NS-HD-NN-HD-HD-HD-NI-NG-NG	TAL20Xam668
Manes.11G035700.2.v7.0;pacid=41317170	325	-	0.320893	CAAAGAAATTTCGAGCCCAAT	2.79443e-05	NI-NG-NI-NN-NI-HD-NS-NS-NN-NG-HD-NS-HD-NN-HD-HD-HD-NI-NG-NG	TAL20Xam668
Manes.12G132200.1.v7.0;pacid=41323410	158	+	0.320871	AATAAAAAGATCAAGCCCAAC	2.79689e-05	NI-NG-NI-NN-NI-HD-NS-NS-NN-NG-HD-NS-HD-NN-HD-HD-HD-NI-NG-NG	TAL20Xam668
Manes.09G014500.1.v7.0;pacid=41311982	91	+	0.320822	TATACAATCGTAGAGTACATT	2.80239e-05	NI-NG-NI-NN-NI-HD-NS-NS-NN-NG-HD-NS-HD-NN-HD-HD-HD-NI-NG-NG	TAL20Xam668
Manes.09G014500.1.v7.0;pacid=41311982	179	+	0.320822	TATACAATCGTAGAGTACATT	2.80239e-05	NI-NG-NI-NN-NI-HD-NS-NS-NN-NG-HD-NS-HD-NN-HD-HD-HD-NI-NG-NG	TAL20Xam668
Manes.08G147100.1.v7.0;pacid=41313381	213	+	0.320755	TAGATAAAAACCTCGCCAATT	2.80986e-05	NI-NG-NI-NN-NI-HD-NS-NS-NN-NG-HD-NS-HD-NN-HD-HD-HD-NI-NG-NG	TAL20Xam668
Manes.02G054400.1.v7.0;pacid=41340787	194	-	0.320738	TTTAGTCAGATCACTCCAAAT	2.81173e-05	NI-NG-NI-NN-NI-HD-NS-NS-NN-NG-HD-NS-HD-NN-HD-HD-HD-NI-NG-NG	TAL20Xam668
Manes.07G033400.1.v7.0;pacid=41327979	266	+	0.320659	TATAGACTATTACTACACAAT	2.82063e-05	NI-NG-NI-NN-NI-HD-NS-NS-NN-NG-HD-NS-HD-NN-HD-HD-HD-NI-NG-NG	TAL20Xam668
Manes.09G179100.1.v7.0;pacid=41311525	251	+	0.320605	TATAAATACCTCACAACCCAT	2.82672e-05	NI-NG-NI-NN-NI-HD-NS-NS-NN-NG-HD-NS-HD-NN-HD-HD-HD-NI-NG-NG	TAL20Xam668
Manes.03G088900.1.v7.0;pacid=41309019	221	-	0.320538	TTAAAACTAATATCGCCCACT	2.83425e-05	NI-NG-NI-NN-NI-HD-NS-NS-NN-NG-HD-NS-HD-NN-HD-HD-HD-NI-NG-NG	TAL20Xam668
Manes.01G191600.1.v7.0;pacid=41327036	249	+	0.320394	TATAAGCCCATCAAACACAGT	2.85052e-05	NI-NG-NI-NN-NI-HD-NS-NS-NN-NG-HD-NS-HD-NN-HD-HD-HD-NI-NG-NG	TAL20Xam668
Manes.11G098400.1.v7.0;pacid=41318257	222	+	0.320393	CCTGGGCCCACCACGCCCATT	2.85066e-05	NI-NG-NI-NN-NI-HD-NS-NS-NN-NG-HD-NS-HD-NN-HD-HD-HD-NI-NG-NG	TAL20Xam668
Manes.01G021500.1.v7.0;pacid=41327474	249	+	0.320322	TCTAGACTCGACCCGAGCAAT	2.85873e-05	NI-NG-NI-NN-NI-HD-NS-NS-NN-NG-HD-NS-HD-NN-HD-HD-HD-NI-NG-NG	TAL20Xam668
Manes.10G123000.1.v7.0;pacid=41320819	57	+	0.320288	TCCAAACATATCACTACCACT	2.8626e-05	NI-NG-NI-NN-NI-HD-NS-NS-NN-NG-HD-NS-HD-NN-HD-HD-HD-NI-NG-NG	TAL20Xam668
Manes.15G191600.1.v7.0;pacid=41307219	170	-	0.320174	TATAGACTTCTTAAGCACTTT	2.87562e-05	NI-NG-NI-NN-NI-HD-NS-NS-NN-NG-HD-NS-HD-NN-HD-HD-HD-NI-NG-NG	TAL20Xam668
Manes.16G136600.1.v7.0;pacid=41318828	125	+	0.320157	CATAAACCCGATCCTCACATT	2.87755e-05	NI-NG-NI-NN-NI-HD-NS-NS-NN-NG-HD-NS-HD-NN-HD-HD-HD-NI-NG-NG	TAL20Xam668
Manes.12G097000.1.v7.0;pacid=41322537	171	+	0.320016	TATATATTTTTCTCTTCCATT	2.89378e-05	NI-NG-NI-NN-NI-HD-NS-NS-NN-NG-HD-NS-HD-NN-HD-HD-HD-NI-NG-NG	TAL20Xam668
Manes.10G106100.1.v7.0;pacid=41321771	200	+	0.319997	TATAAAACCATCGCCACCTTC	2.89601e-05	NI-NG-NI-NN-NI-HD-NS-NS-NN-NG-HD-NS-HD-NN-HD-HD-HD-NI-NG-NG	TAL20Xam668
Manes.04G028800.1.v7.0;pacid=41316466	159	+	0.319909	TATAAACTTCTATTGACCCTT	2.90616e-05	NI-NG-NI-NN-NI-HD-NS-NS-NN-NG-HD-NS-HD-NN-HD-HD-HD-NI-NG-NG	TAL20Xam668
Manes.05G207100.1.v7.0;pacid=41336122	143	-	0.319879	TATTTACAGGTCGGCCCAATT	2.90957e-05	NI-NG-NI-NN-NI-HD-NS-NS-NN-NG-HD-NS-HD-NN-HD-HD-HD-NI-NG-NG	TAL20Xam668
Manes.08G122000.1.v7.0;pacid=41314209	186	+	0.319841	TATAAACAAATAACCCCTCTA	2.91398e-05	NI-NG-NI-NN-NI-HD-NS-NS-NN-NG-HD-NS-HD-NN-HD-HD-HD-NI-NG-NG	TAL20Xam668
Manes.06G116400.1.v7.0;pacid=41303754	389	+	0.319803	TATACACACGTAACGCACCAC	2.91835e-05	NI-NG-NI-NN-NI-HD-NS-NS-NN-NG-HD-NS-HD-NN-HD-HD-HD-NI-NG-NG	TAL20Xam668
Manes.17G015100.1.v7.0;pacid=41329428	344	+	0.319789	TATTCAACAATCTCAATCATT	2.92002e-05	NI-NG-NI-NN-NI-HD-NS-NS-NN-NG-HD-NS-HD-NN-HD-HD-HD-NI-NG-NG	TAL20Xam668
Manes.17G072900.1.v7.0;pacid=41329524	105	-	0.319774	TATACACAAATAATAACTATT	2.92182e-05	NI-NG-NI-NN-NI-HD-NS-NS-NN-NG-HD-NS-HD-NN-HD-HD-HD-NI-NG-NG	TAL20Xam668
Manes.08G031800.1.v7.0;pacid=41313038	154	+	0.319622	TAAAACCCAATCCCACCAAAT	2.9395e-05	NI-NG-NI-NN-NI-HD-NS-NS-NN-NG-HD-NS-HD-NN-HD-HD-HD-NI-NG-NG	TAL20Xam668
Manes.S023300.1.v7.0;pacid=41332930	213	-	0.31961	CTTAGAACCATCCCTCCTATT	2.94085e-05	NI-NG-NI-NN-NI-HD-NS-NS-NN-NG-HD-NS-HD-NN-HD-HD-HD-NI-NG-NG	TAL20Xam668
Manes.01G026600.1.v7.0;pacid=41326474	217	+	0.319538	TATATACAAGTTTAACATATT	2.94933e-05	NI-NG-NI-NN-NI-HD-NS-NS-NN-NG-HD-NS-HD-NN-HD-HD-HD-NI-NG-NG	TAL20Xam668
Manes.03G103000.5.v7.0;pacid=41307982	433	-	0.319476	TATGCACAAGTCCTAACCTTT	2.95661e-05	NI-NG-NI-NN-NI-HD-NS-NS-NN-NG-HD-NS-HD-NN-HD-HD-HD-NI-NG-NG	TAL20Xam668
Manes.03G103000.4.v7.0;pacid=41307983	327	-	0.319476	TATGCACAAGTCCTAACCTTT	2.95661e-05	NI-NG-NI-NN-NI-HD-NS-NS-NN-NG-HD-NS-HD-NN-HD-HD-HD-NI-NG-NG	TAL20Xam668
Manes.03G072800.1.v7.0;pacid=41309526	28	-	0.31946	TATAGACAATTTTAACCCAAC	2.95854e-05	NI-NG-NI-NN-NI-HD-NS-NS-NN-NG-HD-NS-HD-NN-HD-HD-HD-NI-NG-NG	TAL20Xam668
Manes.05G167500.1.v7.0;pacid=41335088	205	-	0.319443	CAAACACACCTCTCCTCCATT	2.96047e-05	NI-NG-NI-NN-NI-HD-NS-NS-NN-NG-HD-NS-HD-NN-HD-HD-HD-NI-NG-NG	TAL20Xam668
Manes.16G103600.1.v7.0;pacid=41318777	44	+	0.319404	TGTATAATTTTCCCACCAATT	2.96504e-05	NI-NG-NI-NN-NI-HD-NS-NS-NN-NG-HD-NS-HD-NN-HD-HD-HD-NI-NG-NG	TAL20Xam668
Manes.08G094200.1.v7.0;pacid=41312920	192	+	0.319392	TTTACACCTGTCATGCTCAAT	2.96644e-05	NI-NG-NI-NN-NI-HD-NS-NS-NN-NG-HD-NS-HD-NN-HD-HD-HD-NI-NG-NG	TAL20Xam668
Manes.17G038300.1.v7.0;pacid=41329964	0	+	0.31935	AATAAAAAAAAATCTCCCATT	2.97139e-05	NI-NG-NI-NN-NI-HD-NS-NS-NN-NG-HD-NS-HD-NN-HD-HD-HD-NI-NG-NG	TAL20Xam668
Manes.13G032400.1.v7.0;pacid=41337883	255	+	0.319306	TTTAAACAGGTCTCTCCCTCC	2.97664e-05	NI-NG-NI-NN-NI-HD-NS-NS-NN-NG-HD-NS-HD-NN-HD-HD-HD-NI-NG-NG	TAL20Xam668
Manes.13G032400.2.v7.0;pacid=41337884	255	+	0.319306	TTTAAACAGGTCTCTCCCTCC	2.97664e-05	NI-NG-NI-NN-NI-HD-NS-NS-NN-NG-HD-NS-HD-NN-HD-HD-HD-NI-NG-NG	TAL20Xam668
Manes.17G025100.1.v7.0;pacid=41330454	317	-	0.319243	TATAAACGAACCAATACGATT	2.98411e-05	NI-NG-NI-NN-NI-HD-NS-NS-NN-NG-HD-NS-HD-NN-HD-HD-HD-NI-NG-NG	TAL20Xam668
Manes.17G025100.2.v7.0;pacid=41330455	317	-	0.319243	TATAAACGAACCAATACGATT	2.98411e-05	NI-NG-NI-NN-NI-HD-NS-NS-NN-NG-HD-NS-HD-NN-HD-HD-HD-NI-NG-NG	TAL20Xam668
Manes.17G025100.3.v7.0;pacid=41330456	271	-	0.319243	TATAAACGAACCAATACGATT	2.98411e-05	NI-NG-NI-NN-NI-HD-NS-NS-NN-NG-HD-NS-HD-NN-HD-HD-HD-NI-NG-NG	TAL20Xam668
Manes.17G006000.1.v7.0;pacid=41329634	102	+	0.319217	AATAAATAAATAATACCCATT	2.98722e-05	NI-NG-NI-NN-NI-HD-NS-NS-NN-NG-HD-NS-HD-NN-HD-HD-HD-NI-NG-NG	TAL20Xam668
Manes.05G111400.1.v7.0;pacid=41337066	202	-	0.319217	TATAGACTGCATTCGCCAATC	2.98724e-05	NI-NG-NI-NN-NI-HD-NS-NS-NN-NG-HD-NS-HD-NN-HD-HD-HD-NI-NG-NG	TAL20Xam668
Manes.12G061800.1.v7.0;pacid=41323731	172	-	0.31919	TACAGACGGGCCTCTCGGATT	2.99039e-05	NI-NG-NI-NN-NI-HD-NS-NS-NN-NG-HD-NS-HD-NN-HD-HD-HD-NI-NG-NG	TAL20Xam668
Manes.12G013700.1.v7.0;pacid=41323704	251	+	0.319141	TACACACAAATCTCAATCCTT	2.99622e-05	NI-NG-NI-NN-NI-HD-NS-NS-NN-NG-HD-NS-HD-NN-HD-HD-HD-NI-NG-NG	TAL20Xam668
Manes.17G070300.1.v7.0;pacid=41329494	251	+	0.319136	TAAAACCACTTCTCTCCTATT	2.99687e-05	NI-NG-NI-NN-NI-HD-NS-NS-NN-NG-HD-NS-HD-NN-HD-HD-HD-NI-NG-NG	TAL20Xam668
Manes.03G076200.1.v7.0;pacid=41309724	267	+	0.319127	TATAAAAATGTTGAGCCCAAG	2.99787e-05	NI-NG-NI-NN-NI-HD-NS-NS-NN-NG-HD-NS-HD-NN-HD-HD-HD-NI-NG-NG	TAL20Xam668
Manes.15G008600.1.v7.0;pacid=41305751	285	+	0.31912	AATAAACTAATAAAGACCCTT	2.99874e-05	NI-NG-NI-NN-NI-HD-NS-NS-NN-NG-HD-NS-HD-NN-HD-HD-HD-NI-NG-NG	TAL20Xam668
Manes.06G074800.1.v7.0;pacid=41304611	107	+	0.319063	AGGAGACAGACCACTCCCATT	3.00549e-05	NI-NG-NI-NN-NI-HD-NS-NS-NN-NG-HD-NS-HD-NN-HD-HD-HD-NI-NG-NG	TAL20Xam668
Manes.03G161300.1.v7.0;pacid=41308262	272	-	0.319051	TACAAACAAATAAACCTCATT	3.00695e-05	NI-NG-NI-NN-NI-HD-NS-NS-NN-NG-HD-NS-HD-NN-HD-HD-HD-NI-NG-NG	TAL20Xam668
Manes.12G059300.2.v7.0;pacid=41322355	272	-	0.319051	TACAAACAAATAAACCTCATT	3.00695e-05	NI-NG-NI-NN-NI-HD-NS-NS-NN-NG-HD-NS-HD-NN-HD-HD-HD-NI-NG-NG	TAL20Xam668
Manes.14G169700.1.v7.0;pacid=41331073	260	+	0.319048	CATAGACACAACACAAGCATC	3.0073e-05	NI-NG-NI-NN-NI-HD-NS-NS-NN-NG-HD-NS-HD-NN-HD-HD-HD-NI-NG-NG	TAL20Xam668
Manes.05G031700.1.v7.0;pacid=41335184	258	+	0.319037	AATACTATTATAGCACCCATT	3.00867e-05	NI-NG-NI-NN-NI-HD-NS-NS-NN-NG-HD-NS-HD-NN-HD-HD-HD-NI-NG-NG	TAL20Xam668
Manes.04G062200.1.v7.0;pacid=41316313	44	-	0.319	TATAGATTATTCTAGCCCAAA	3.01311e-05	NI-NG-NI-NN-NI-HD-NS-NS-NN-NG-HD-NS-HD-NN-HD-HD-HD-NI-NG-NG	TAL20Xam668
Manes.15G032900.1.v7.0;pacid=41306322	248	+	0.318981	AAAAGACATCTAACCCACATT	3.01528e-05	NI-NG-NI-NN-NI-HD-NS-NS-NN-NG-HD-NS-HD-NN-HD-HD-HD-NI-NG-NG	TAL20Xam668
Manes.04G043700.1.v7.0;pacid=41315369	77	+	0.318981	TATAAAGAAATAAAACCAATT	3.01535e-05	NI-NG-NI-NN-NI-HD-NS-NS-NN-NG-HD-NS-HD-NN-HD-HD-HD-NI-NG-NG	TAL20Xam668
Manes.04G030300.1.v7.0;pacid=41315922	232	+	0.31898	TATATATCACTCACTCCCCAT	3.01548e-05	NI-NG-NI-NN-NI-HD-NS-NS-NN-NG-HD-NS-HD-NN-HD-HD-HD-NI-NG-NG	TAL20Xam668
Manes.12G034700.2.v7.0;pacid=41322973	123	-	0.318929	TTTAGACCTGTAGTGACCAGT	3.02153e-05	NI-NG-NI-NN-NI-HD-NS-NS-NN-NG-HD-NS-HD-NN-HD-HD-HD-NI-NG-NG	TAL20Xam668
Manes.11G001500.1.v7.0;pacid=41317691	78	+	0.318892	TTTCAAAAACTCCCACCTATT	3.02596e-05	NI-NG-NI-NN-NI-HD-NS-NS-NN-NG-HD-NS-HD-NN-HD-HD-HD-NI-NG-NG	TAL20Xam668
Manes.16G002600.1.v7.0;pacid=41319652	110	+	0.318883	TCTATCCTCGTCGTGCCGATT	3.02709e-05	NI-NG-NI-NN-NI-HD-NS-NS-NN-NG-HD-NS-HD-NN-HD-HD-HD-NI-NG-NG	TAL20Xam668
Manes.10G084500.1.v7.0;pacid=41322068	419	+	0.318882	CATAGCCAAGCCATGACCATA	3.02723e-05	NI-NG-NI-NN-NI-HD-NS-NS-NN-NG-HD-NS-HD-NN-HD-HD-HD-NI-NG-NG	TAL20Xam668
Manes.08G158500.1.v7.0;pacid=41313318	165	+	0.318869	TAAAAACGGATAAAGCCCAGA	3.02873e-05	NI-NG-NI-NN-NI-HD-NS-NS-NN-NG-HD-NS-HD-NN-HD-HD-HD-NI-NG-NG	TAL20Xam668
Manes.13G079600.7.v7.0;pacid=41337671	118	-	0.31885	TACAAACAAACACTACCCATT	3.03103e-05	NI-NG-NI-NN-NI-HD-NS-NS-NN-NG-HD-NS-HD-NN-HD-HD-HD-NI-NG-NG	TAL20Xam668
Manes.03G186700.1.v7.0;pacid=41309580	16	+	0.31883	TTTACAAACCTCAAACTCATT	3.03345e-05	NI-NG-NI-NN-NI-HD-NS-NS-NN-NG-HD-NS-HD-NN-HD-HD-HD-NI-NG-NG	TAL20Xam668
Manes.01G114400.1.v7.0;pacid=41325749	209	+	0.318736	CACAGACAGATCACCAACATA	3.04479e-05	NI-NG-NI-NN-NI-HD-NS-NS-NN-NG-HD-NS-HD-NN-HD-HD-HD-NI-NG-NG	TAL20Xam668
Manes.08G076200.1.v7.0;pacid=41313815	168	-	0.318717	TATGGAAGAACCAAACACATT	3.04714e-05	NI-NG-NI-NN-NI-HD-NS-NS-NN-NG-HD-NS-HD-NN-HD-HD-HD-NI-NG-NG	TAL20Xam668
Manes.02G112800.1.v7.0;pacid=41340403	122	-	0.318687	TATTGAATAGTCACGCAAGTT	3.05077e-05	NI-NG-NI-NN-NI-HD-NS-NS-NN-NG-HD-NS-HD-NN-HD-HD-HD-NI-NG-NG	TAL20Xam668
Manes.06G059300.1.v7.0;pacid=41303073	228	-	0.318678	TATAGACATTAGACACCCAGT	3.05184e-05	NI-NG-NI-NN-NI-HD-NS-NS-NN-NG-HD-NS-HD-NN-HD-HD-HD-NI-NG-NG	TAL20Xam668
Manes.12G052600.1.v7.0;pacid=41322611	189	+	0.318674	TATTTACATCTACCTCTCATT	3.05232e-05	NI-NG-NI-NN-NI-HD-NS-NS-NN-NG-HD-NS-HD-NN-HD-HD-HD-NI-NG-NG	TAL20Xam668
Manes.16G007100.1.v7.0;pacid=41320098	399	+	0.318665	TATAACGGCGTCTCAACCACT	3.05335e-05	NI-NG-NI-NN-NI-HD-NS-NS-NN-NG-HD-NS-HD-NN-HD-HD-HD-NI-NG-NG	TAL20Xam668
Manes.05G159400.1.v7.0;pacid=41336384	82	+	0.318632	TATACACTCATCCAGCTCAAC	3.05739e-05	NI-NG-NI-NN-NI-HD-NS-NS-NN-NG-HD-NS-HD-NN-HD-HD-HD-NI-NG-NG	TAL20Xam668
Manes.05G159400.2.v7.0;pacid=41336385	364	+	0.318632	TATACACTCATCCAGCTCAAC	3.05739e-05	NI-NG-NI-NN-NI-HD-NS-NS-NN-NG-HD-NS-HD-NN-HD-HD-HD-NI-NG-NG	TAL20Xam668
Manes.15G159000.1.v7.0;pacid=41305122	107	-	0.318625	TTTAGAAGAATCGAACCAAAT	3.05829e-05	NI-NG-NI-NN-NI-HD-NS-NS-NN-NG-HD-NS-HD-NN-HD-HD-HD-NI-NG-NG	TAL20Xam668
Manes.15G159000.2.v7.0;pacid=41305123	107	-	0.318625	TTTAGAAGAATCGAACCAAAT	3.05829e-05	NI-NG-NI-NN-NI-HD-NS-NS-NN-NG-HD-NS-HD-NN-HD-HD-HD-NI-NG-NG	TAL20Xam668
Manes.14G069900.1.v7.0;pacid=41331819	124	+	0.318579	AACCAACCACTCTCGCCCACT	3.0639e-05	NI-NG-NI-NN-NI-HD-NS-NS-NN-NG-HD-NS-HD-NN-HD-HD-HD-NI-NG-NG	TAL20Xam668
Manes.14G124800.2.v7.0;pacid=41331640	94	+	0.318575	TTTAAGCGGAATACACCCATT	3.06427e-05	NI-NG-NI-NN-NI-HD-NS-NS-NN-NG-HD-NS-HD-NN-HD-HD-HD-NI-NG-NG	TAL20Xam668
Manes.03G028300.1.v7.0;pacid=41307659	36	+	0.318571	AAATGACATTTCACACCCACT	3.06476e-05	NI-NG-NI-NN-NI-HD-NS-NS-NN-NG-HD-NS-HD-NN-HD-HD-HD-NI-NG-NG	TAL20Xam668
Manes.08G062500.1.v7.0;pacid=41313400	84	-	0.318545	CAAAGACTAATCTAGACTATT	3.06794e-05	NI-NG-NI-NN-NI-HD-NS-NS-NN-NG-HD-NS-HD-NN-HD-HD-HD-NI-NG-NG	TAL20Xam668
Manes.08G062500.2.v7.0;pacid=41313401	84	-	0.318545	CAAAGACTAATCTAGACTATT	3.06794e-05	NI-NG-NI-NN-NI-HD-NS-NS-NN-NG-HD-NS-HD-NN-HD-HD-HD-NI-NG-NG	TAL20Xam668
Manes.01G050700.1.v7.0;pacid=41326619	179	-	0.318508	TATAAACATGGATCCACCATA	3.07251e-05	NI-NG-NI-NN-NI-HD-NS-NS-NN-NG-HD-NS-HD-NN-HD-HD-HD-NI-NG-NG	TAL20Xam668
Manes.03G189200.1.v7.0;pacid=41308046	207	+	0.318505	TGTAAACGTGTCAAGACGAAT	3.0728e-05	NI-NG-NI-NN-NI-HD-NS-NS-NN-NG-HD-NS-HD-NN-HD-HD-HD-NI-NG-NG	TAL20Xam668
Manes.09G089800.1.v7.0;pacid=41311883	205	+	0.318473	TGTCTGCTCATCACTCCCATT	3.07672e-05	NI-NG-NI-NN-NI-HD-NS-NS-NN-NG-HD-NS-HD-NN-HD-HD-HD-NI-NG-NG	TAL20Xam668
Manes.09G089800.2.v7.0;pacid=41311884	205	+	0.318473	TGTCTGCTCATCACTCCCATT	3.07672e-05	NI-NG-NI-NN-NI-HD-NS-NS-NN-NG-HD-NS-HD-NN-HD-HD-HD-NI-NG-NG	TAL20Xam668
Manes.18G008600.1.v7.0;pacid=41333408	21	+	0.318438	TCCAAAACAATCAAGCCCATA	3.08104e-05	NI-NG-NI-NN-NI-HD-NS-NS-NN-NG-HD-NS-HD-NN-HD-HD-HD-NI-NG-NG	TAL20Xam668
Manes.04G141000.1.v7.0;pacid=41314731	356	-	0.318331	CCTAACAAATTCACTCCCATT	3.09408e-05	NI-NG-NI-NN-NI-HD-NS-NS-NN-NG-HD-NS-HD-NN-HD-HD-HD-NI-NG-NG	TAL20Xam668
Manes.10G014900.1.v7.0;pacid=41322146	92	+	0.318296	CACACACGAAACAAAACCATT	3.0984e-05	NI-NG-NI-NN-NI-HD-NS-NS-NN-NG-HD-NS-HD-NN-HD-HD-HD-NI-NG-NG	TAL20Xam668
Manes.10G014900.1.v7.0;pacid=41322146	239	+	0.318296	CACACACGAAACAAAACCATT	3.0984e-05	NI-NG-NI-NN-NI-HD-NS-NS-NN-NG-HD-NS-HD-NN-HD-HD-HD-NI-NG-NG	TAL20Xam668
Manes.16G029200.1.v7.0;pacid=41318826	271	-	0.318278	TCTACTACAATCACACCCAAT	3.10059e-05	NI-NG-NI-NN-NI-HD-NS-NS-NN-NG-HD-NS-HD-NN-HD-HD-HD-NI-NG-NG	TAL20Xam668
Manes.12G034200.2.v7.0;pacid=41323117	183	-	0.318252	TTTAGCAAAATCACGCAAATT	3.10385e-05	NI-NG-NI-NN-NI-HD-NS-NS-NN-NG-HD-NS-HD-NN-HD-HD-HD-NI-NG-NG	TAL20Xam668
Manes.13G012000.1.v7.0;pacid=41339089	48	+	0.31822	TGGAGACTGGTCATCCCCATG	3.10784e-05	NI-NG-NI-NN-NI-HD-NS-NS-NN-NG-HD-NS-HD-NN-HD-HD-HD-NI-NG-NG	TAL20Xam668
Manes.12G003100.1.v7.0;pacid=41323510	134	-	0.318218	TTGACAATGCTCAAGCCCATT	3.10807e-05	NI-NG-NI-NN-NI-HD-NS-NS-NN-NG-HD-NS-HD-NN-HD-HD-HD-NI-NG-NG	TAL20Xam668
Manes.15G116100.1.v7.0;pacid=41305316	185	+	0.318159	TCTATAAATCTCTCCCCCTTT	3.11526e-05	NI-NG-NI-NN-NI-HD-NS-NS-NN-NG-HD-NS-HD-NN-HD-HD-HD-NI-NG-NG	TAL20Xam668
Manes.13G009200.1.v7.0;pacid=41338957	256	+	0.318123	TATAGAATTTCAGAGCCAATT	3.11979e-05	NI-NG-NI-NN-NI-HD-NS-NS-NN-NG-HD-NS-HD-NN-HD-HD-HD-NI-NG-NG	TAL20Xam668
Manes.18G079800.1.v7.0;pacid=41333082	0	+	0.318029	CATAAACCTTTCTAAATCATT	3.13146e-05	NI-NG-NI-NN-NI-HD-NS-NS-NN-NG-HD-NS-HD-NN-HD-HD-HD-NI-NG-NG	TAL20Xam668
Manes.01G086400.1.v7.0;pacid=41327165	39	+	0.318002	TGCTGACGCGTCACACCACTT	3.13477e-05	NI-NG-NI-NN-NI-HD-NS-NS-NN-NG-HD-NS-HD-NN-HD-HD-HD-NI-NG-NG	TAL20Xam668
Manes.12G083300.1.v7.0;pacid=41323569	344	+	0.318	CATAAACTCTTCCCTTCTATT	3.13506e-05	NI-NG-NI-NN-NI-HD-NS-NS-NN-NG-HD-NS-HD-NN-HD-HD-HD-NI-NG-NG	TAL20Xam668
Manes.07G017300.1.v7.0;pacid=41329119	232	-	0.317978	CATAAACAAATTAAGACAATT	3.13779e-05	NI-NG-NI-NN-NI-HD-NS-NS-NN-NG-HD-NS-HD-NN-HD-HD-HD-NI-NG-NG	TAL20Xam668
Manes.14G062700.1.v7.0;pacid=41332237	231	+	0.317881	TCTTCCCTTCTCCCTCCCATT	3.14986e-05	NI-NG-NI-NN-NI-HD-NS-NS-NN-NG-HD-NS-HD-NN-HD-HD-HD-NI-NG-NG	TAL20Xam668
Manes.17G101100.1.v7.0;pacid=41329898	182	+	0.317844	TAAAAAAAGATCACTCCATTT	3.15443e-05	NI-NG-NI-NN-NI-HD-NS-NS-NN-NG-HD-NS-HD-NN-HD-HD-HD-NI-NG-NG	TAL20Xam668
Manes.01G207100.1.v7.0;pacid=41325066	58	-	0.317787	AATAGACCATTCACAAACAGT	3.16164e-05	NI-NG-NI-NN-NI-HD-NS-NS-NN-NG-HD-NS-HD-NN-HD-HD-HD-NI-NG-NG	TAL20Xam668
Manes.14G065600.1.v7.0;pacid=41332835	17	+	0.317681	CATAGCCTGGTTGCTACCTTT	3.17482e-05	NI-NG-NI-NN-NI-HD-NS-NS-NN-NG-HD-NS-HD-NN-HD-HD-HD-NI-NG-NG	TAL20Xam668
Manes.10G098600.1.v7.0;pacid=41321304	152	-	0.317666	TAAAAATTAATTACTCCCATT	3.17681e-05	NI-NG-NI-NN-NI-HD-NS-NS-NN-NG-HD-NS-HD-NN-HD-HD-HD-NI-NG-NG	TAL20Xam668
Manes.04G032800.1.v7.0;pacid=41314707	227	+	0.317625	TATAGTATTGACACAACCGTT	3.18192e-05	NI-NG-NI-NN-NI-HD-NS-NS-NN-NG-HD-NS-HD-NN-HD-HD-HD-NI-NG-NG	TAL20Xam668
Manes.14G043600.1.v7.0;pacid=41331620	13	+	0.317623	TCTTGACCCATCACTCCTACT	3.18217e-05	NI-NG-NI-NN-NI-HD-NS-NS-NN-NG-HD-NS-HD-NN-HD-HD-HD-NI-NG-NG	TAL20Xam668
Manes.08G066000.1.v7.0;pacid=41313177	435	-	0.317614	TATTGAATGATCACCCCTAAT	3.18331e-05	NI-NG-NI-NN-NI-HD-NS-NS-NN-NG-HD-NS-HD-NN-HD-HD-HD-NI-NG-NG	TAL20Xam668
Manes.14G144700.1.v7.0;pacid=41331862	203	-	0.317422	TATATATTAGTCCTCCCCCTT	3.20765e-05	NI-NG-NI-NN-NI-HD-NS-NS-NN-NG-HD-NS-HD-NN-HD-HD-HD-NI-NG-NG	TAL20Xam668
Manes.17G027800.2.v7.0;pacid=41329671	106	-	0.317364	TGCACAAGGATCGCCACCATT	3.21502e-05	NI-NG-NI-NN-NI-HD-NS-NS-NN-NG-HD-NS-HD-NN-HD-HD-HD-NI-NG-NG	TAL20Xam668
Manes.15G127500.1.v7.0;pacid=41306204	217	+	0.317363	CATTAACATCACTCACCCACT	3.21505e-05	NI-NG-NI-NN-NI-HD-NS-NS-NN-NG-HD-NS-HD-NN-HD-HD-HD-NI-NG-NG	TAL20Xam668
Manes.10G108200.1.v7.0;pacid=41321581	359	+	0.317353	TATCCAATGTTCTAGCCTATT	3.21643e-05	NI-NG-NI-NN-NI-HD-NS-NS-NN-NG-HD-NS-HD-NN-HD-HD-HD-NI-NG-NG	TAL20Xam668
Manes.14G100600.1.v7.0;pacid=41332008	140	-	0.317294	TACTGACAGAGCAAGCCCATC	3.2239e-05	NI-NG-NI-NN-NI-HD-NS-NS-NN-NG-HD-NS-HD-NN-HD-HD-HD-NI-NG-NG	TAL20Xam668
Manes.15G097200.1.v7.0;pacid=41306676	419	+	0.317289	TTTCAACAACTTCAACCCATT	3.22453e-05	NI-NG-NI-NN-NI-HD-NS-NS-NN-NG-HD-NS-HD-NN-HD-HD-HD-NI-NG-NG	TAL20Xam668
Manes.13G033900.1.v7.0;pacid=41337380	169	+	0.317195	TGTATACACATCCCTCTCCTT	3.23652e-05	NI-NG-NI-NN-NI-HD-NS-NS-NN-NG-HD-NS-HD-NN-HD-HD-HD-NI-NG-NG	TAL20Xam668
Manes.03G157600.1.v7.0;pacid=41307986	100	+	0.31716	CACAAACTTGTCTCCCAAATT	3.24099e-05	NI-NG-NI-NN-NI-HD-NS-NS-NN-NG-HD-NS-HD-NN-HD-HD-HD-NI-NG-NG	TAL20Xam668
Manes.03G136000.1.v7.0;pacid=41309702	37	+	0.317077	AAAAGAAGAATCACGCGCCTT	3.25165e-05	NI-NG-NI-NN-NI-HD-NS-NS-NN-NG-HD-NS-HD-NN-HD-HD-HD-NI-NG-NG	TAL20Xam668
Manes.14G098700.1.v7.0;pacid=41332123	90	+	0.317022	TTTAAACGGCACGATCCAATT	3.25882e-05	NI-NG-NI-NN-NI-HD-NS-NS-NN-NG-HD-NS-HD-NN-HD-HD-HD-NI-NG-NG	TAL20Xam668
Manes.12G028700.1.v7.0;pacid=41322693	195	+	0.316967	TATTAAAAGATTTATCCCATT	3.26584e-05	NI-NG-NI-NN-NI-HD-NS-NS-NN-NG-HD-NS-HD-NN-HD-HD-HD-NI-NG-NG	TAL20Xam668
Manes.09G181800.1.v7.0;pacid=41310427	208	-	0.316963	TGTGGGCCCATCACACCCATA	3.26642e-05	NI-NG-NI-NN-NI-HD-NS-NS-NN-NG-HD-NS-HD-NN-HD-HD-HD-NI-NG-NG	TAL20Xam668
Manes.16G043800.1.v7.0;pacid=41319653	270	-	0.31691	TCTACACAAATCACACACACA	3.27319e-05	NI-NG-NI-NN-NI-HD-NS-NS-NN-NG-HD-NS-HD-NN-HD-HD-HD-NI-NG-NG	TAL20Xam668
Manes.03G115700.1.v7.0;pacid=41308825	180	+	0.316876	TCTGGTCCGACCGCGCCCAAT	3.27761e-05	NI-NG-NI-NN-NI-HD-NS-NS-NN-NG-HD-NS-HD-NN-HD-HD-HD-NI-NG-NG	TAL20Xam668
Manes.15G079000.1.v7.0;pacid=41305326	173	+	0.316731	TTTGAACATTTCACTCCCTTT	3.29653e-05	NI-NG-NI-NN-NI-HD-NS-NS-NN-NG-HD-NS-HD-NN-HD-HD-HD-NI-NG-NG	TAL20Xam668
Manes.12G033800.1.v7.0;pacid=41322528	202	-	0.316703	TCTATACAAGTCTCGCTTCTT	3.30009e-05	NI-NG-NI-NN-NI-HD-NS-NS-NN-NG-HD-NS-HD-NN-HD-HD-HD-NI-NG-NG	TAL20Xam668
Manes.10G145700.1.v7.0;pacid=41320764	86	-	0.316599	TAGAGACGCGTATCAGACATT	3.31376e-05	NI-NG-NI-NN-NI-HD-NS-NS-NN-NG-HD-NS-HD-NN-HD-HD-HD-NI-NG-NG	TAL20Xam668
Manes.17G074100.1.v7.0;pacid=41330790	29	+	0.316599	CATGCATCTCTCTCTCCCATT	3.31376e-05	NI-NG-NI-NN-NI-HD-NS-NS-NN-NG-HD-NS-HD-NN-HD-HD-HD-NI-NG-NG	TAL20Xam668
Manes.17G074100.2.v7.0;pacid=41330791	29	+	0.316599	CATGCATCTCTCTCTCCCATT	3.31376e-05	NI-NG-NI-NN-NI-HD-NS-NS-NN-NG-HD-NS-HD-NN-HD-HD-HD-NI-NG-NG	TAL20Xam668
Manes.17G074100.3.v7.0;pacid=41330792	29	+	0.316599	CATGCATCTCTCTCTCCCATT	3.31376e-05	NI-NG-NI-NN-NI-HD-NS-NS-NN-NG-HD-NS-HD-NN-HD-HD-HD-NI-NG-NG	TAL20Xam668
Manes.17G074100.4.v7.0;pacid=41330793	29	+	0.316599	CATGCATCTCTCTCTCCCATT	3.31376e-05	NI-NG-NI-NN-NI-HD-NS-NS-NN-NG-HD-NS-HD-NN-HD-HD-HD-NI-NG-NG	TAL20Xam668
Manes.01G010200.1.v7.0;pacid=41325490	62	+	0.316592	TATAGTCTTTTCTCTCCCTGT	3.31464e-05	NI-NG-NI-NN-NI-HD-NS-NS-NN-NG-HD-NS-HD-NN-HD-HD-HD-NI-NG-NG	TAL20Xam668
Manes.02G011500.1.v7.0;pacid=41340347	130	+	0.31649	TCTCCACAGTTCTCGCCACTT	3.32804e-05	NI-NG-NI-NN-NI-HD-NS-NS-NN-NG-HD-NS-HD-NN-HD-HD-HD-NI-NG-NG	TAL20Xam668
Manes.01G015500.1.v7.0;pacid=41324532	19	+	0.316483	TATAAACAAAAATTTACCATT	3.32897e-05	NI-NG-NI-NN-NI-HD-NS-NS-NN-NG-HD-NS-HD-NN-HD-HD-HD-NI-NG-NG	TAL20Xam668
Manes.05G070300.1.v7.0;pacid=41335732	82	+	0.316469	TCTAAAAATTTCCCGCTCAAT	3.33077e-05	NI-NG-NI-NN-NI-HD-NS-NS-NN-NG-HD-NS-HD-NN-HD-HD-HD-NI-NG-NG	TAL20Xam668
Manes.03G051400.1.v7.0;pacid=41308308	263	-	0.316459	TCCAAACGGGACCCTCCTATT	3.33207e-05	NI-NG-NI-NN-NI-HD-NS-NS-NN-NG-HD-NS-HD-NN-HD-HD-HD-NI-NG-NG	TAL20Xam668
Manes.01G268900.1.v7.0;pacid=41326472	309	+	0.316397	TATTGATTGATCACCACCGTT	3.34023e-05	NI-NG-NI-NN-NI-HD-NS-NS-NN-NG-HD-NS-HD-NN-HD-HD-HD-NI-NG-NG	TAL20Xam668
Manes.01G268900.2.v7.0;pacid=41326473	309	+	0.316397	TATTGATTGATCACCACCGTT	3.34023e-05	NI-NG-NI-NN-NI-HD-NS-NS-NN-NG-HD-NS-HD-NN-HD-HD-HD-NI-NG-NG	TAL20Xam668
Manes.01G179800.1.v7.0;pacid=41326327	387	-	0.316383	CGTAGATAGGTCTCGCCCAGA	3.34214e-05	NI-NG-NI-NN-NI-HD-NS-NS-NN-NG-HD-NS-HD-NN-HD-HD-HD-NI-NG-NG	TAL20Xam668
Manes.02G061800.1.v7.0;pacid=41340296	170	-	0.316359	TACAGTAGGACCTCGCCCACT	3.34525e-05	NI-NG-NI-NN-NI-HD-NS-NS-NN-NG-HD-NS-HD-NN-HD-HD-HD-NI-NG-NG	TAL20Xam668
Manes.16G134600.1.v7.0;pacid=41319515	247	-	0.316358	TATACAACAGATTCACACATT	3.34545e-05	NI-NG-NI-NN-NI-HD-NS-NS-NN-NG-HD-NS-HD-NN-HD-HD-HD-NI-NG-NG	TAL20Xam668
Manes.05G050100.1.v7.0;pacid=41336196	409	+	0.316325	TAGAATCAGTTCTCCCTCATT	3.34985e-05	NI-NG-NI-NN-NI-HD-NS-NS-NN-NG-HD-NS-HD-NN-HD-HD-HD-NI-NG-NG	TAL20Xam668
Manes.02G091700.1.v7.0;pacid=41341501	76	+	0.31631	TACGGTCTGGTCTCAGCCATT	3.35185e-05	NI-NG-NI-NN-NI-HD-NS-NS-NN-NG-HD-NS-HD-NN-HD-HD-HD-NI-NG-NG	TAL20Xam668
Manes.06G112400.1.v7.0;pacid=41304862	67	+	0.316294	TATAGAATAATTTCTCACCTT	3.35387e-05	NI-NG-NI-NN-NI-HD-NS-NS-NN-NG-HD-NS-HD-NN-HD-HD-HD-NI-NG-NG	TAL20Xam668
Manes.15G024300.1.v7.0;pacid=41306158	47	+	0.31624	TGTAAACTCATCTCTCGCCTT	3.36107e-05	NI-NG-NI-NN-NI-HD-NS-NS-NN-NG-HD-NS-HD-NN-HD-HD-HD-NI-NG-NG	TAL20Xam668
Manes.08G073600.1.v7.0;pacid=41313763	65	-	0.316223	CATACAAGCACCTCATCCATT	3.3633e-05	NI-NG-NI-NN-NI-HD-NS-NS-NN-NG-HD-NS-HD-NN-HD-HD-HD-NI-NG-NG	TAL20Xam668
Manes.07G038700.1.v7.0;pacid=41328963	74	-	0.316205	TATAAAAAATCATCACCAATT	3.36568e-05	NI-NG-NI-NN-NI-HD-NS-NS-NN-NG-HD-NS-HD-NN-HD-HD-HD-NI-NG-NG	TAL20Xam668
Manes.03G106700.1.v7.0;pacid=41308516	44	+	0.316154	TTTAGAGACTTCACTCACATT	3.37245e-05	NI-NG-NI-NN-NI-HD-NS-NS-NN-NG-HD-NS-HD-NN-HD-HD-HD-NI-NG-NG	TAL20Xam668
Manes.09G095700.1.v7.0;pacid=41311691	95	-	0.316075	CATAAACTAGTATCAACCACA	3.38308e-05	NI-NG-NI-NN-NI-HD-NS-NS-NN-NG-HD-NS-HD-NN-HD-HD-HD-NI-NG-NG	TAL20Xam668
Manes.01G148700.1.v7.0;pacid=41326396	10	+	0.316058	TAAATAAATTTCACTCTCATT	3.38532e-05	NI-NG-NI-NN-NI-HD-NS-NS-NN-NG-HD-NS-HD-NN-HD-HD-HD-NI-NG-NG	TAL20Xam668
Manes.01G148700.2.v7.0;pacid=41326397	10	+	0.316058	TAAATAAATTTCACTCTCATT	3.38532e-05	NI-NG-NI-NN-NI-HD-NS-NS-NN-NG-HD-NS-HD-NN-HD-HD-HD-NI-NG-NG	TAL20Xam668
Manes.07G001200.1.v7.0;pacid=41328894	325	+	0.316032	TATATACATTGCATACCCAAT	3.38874e-05	NI-NG-NI-NN-NI-HD-NS-NS-NN-NG-HD-NS-HD-NN-HD-HD-HD-NI-NG-NG	TAL20Xam668
Manes.18G010800.1.v7.0;pacid=41333764	237	-	0.316012	TTTAAACTAATGCCGCCTATT	3.3914e-05	NI-NG-NI-NN-NI-HD-NS-NS-NN-NG-HD-NS-HD-NN-HD-HD-HD-NI-NG-NG	TAL20Xam668
Manes.16G030800.1.v7.0;pacid=41320208	90	+	0.31601	TTTACACCCTTCACTCCCAAA	3.3917e-05	NI-NG-NI-NN-NI-HD-NS-NS-NN-NG-HD-NS-HD-NN-HD-HD-HD-NI-NG-NG	TAL20Xam668
Manes.07G058100.1.v7.0;pacid=41328425	195	-	0.315989	CATTAAAAAGTATCTACCATT	3.39458e-05	NI-NG-NI-NN-NI-HD-NS-NS-NN-NG-HD-NS-HD-NN-HD-HD-HD-NI-NG-NG	TAL20Xam668
Manes.07G058100.2.v7.0;pacid=41328426	195	-	0.315989	CATTAAAAAGTATCTACCATT	3.39458e-05	NI-NG-NI-NN-NI-HD-NS-NS-NN-NG-HD-NS-HD-NN-HD-HD-HD-NI-NG-NG	TAL20Xam668
Manes.S008600.1.v7.0;pacid=41312261	259	+	0.315948	AATAAACGGCTCACACTCCAT	3.40009e-05	NI-NG-NI-NN-NI-HD-NS-NS-NN-NG-HD-NS-HD-NN-HD-HD-HD-NI-NG-NG	TAL20Xam668
Manes.15G019800.1.v7.0;pacid=41306206	297	+	0.315939	TATCACCAGAGCGCCCCCATA	3.40122e-05	NI-NG-NI-NN-NI-HD-NS-NS-NN-NG-HD-NS-HD-NN-HD-HD-HD-NI-NG-NG	TAL20Xam668
Manes.11G071500.1.v7.0;pacid=41318550	243	+	0.315936	AAAAACCAAAACTCACCCATT	3.40165e-05	NI-NG-NI-NN-NI-HD-NS-NS-NN-NG-HD-NS-HD-NN-HD-HD-HD-NI-NG-NG	TAL20Xam668
Manes.16G073000.1.v7.0;pacid=41318835	175	+	0.315913	TCTTCCCGAGTCCTCCCCATT	3.40474e-05	NI-NG-NI-NN-NI-HD-NS-NS-NN-NG-HD-NS-HD-NN-HD-HD-HD-NI-NG-NG	TAL20Xam668
Manes.16G073000.2.v7.0;pacid=41318836	175	+	0.315913	TCTTCCCGAGTCCTCCCCATT	3.40474e-05	NI-NG-NI-NN-NI-HD-NS-NS-NN-NG-HD-NS-HD-NN-HD-HD-HD-NI-NG-NG	TAL20Xam668
Manes.01G184800.3.v7.0;pacid=41324649	115	-	0.315846	CCAAGACCCATCTCCCCAATT	3.4137e-05	NI-NG-NI-NN-NI-HD-NS-NS-NN-NG-HD-NS-HD-NN-HD-HD-HD-NI-NG-NG	TAL20Xam668
Manes.13G096500.1.v7.0;pacid=41338533	170	+	0.315843	TACTCACAGCTCACACCCAAA	3.41411e-05	NI-NG-NI-NN-NI-HD-NS-NS-NN-NG-HD-NS-HD-NN-HD-HD-HD-NI-NG-NG	TAL20Xam668
Manes.13G096500.2.v7.0;pacid=41338534	170	+	0.315843	TACTCACAGCTCACACCCAAA	3.41411e-05	NI-NG-NI-NN-NI-HD-NS-NS-NN-NG-HD-NS-HD-NN-HD-HD-HD-NI-NG-NG	TAL20Xam668
Manes.15G137900.1.v7.0;pacid=41305651	246	+	0.31584	TCTAAACGCTTCTCTCTCAGT	3.41461e-05	NI-NG-NI-NN-NI-HD-NS-NS-NN-NG-HD-NS-HD-NN-HD-HD-HD-NI-NG-NG	TAL20Xam668
Manes.02G012000.1.v7.0;pacid=41340794	249	+	0.315818	TATATATATATCCCTCCACTT	3.4175e-05	NI-NG-NI-NN-NI-HD-NS-NS-NN-NG-HD-NS-HD-NN-HD-HD-HD-NI-NG-NG	TAL20Xam668
Manes.18G143700.1.v7.0;pacid=41333016	411	-	0.315771	TATAAACAAAAATCACTCACT	3.42379e-05	NI-NG-NI-NN-NI-HD-NS-NS-NN-NG-HD-NS-HD-NN-HD-HD-HD-NI-NG-NG	TAL20Xam668
Manes.02G060600.1.v7.0;pacid=41339709	392	+	0.315738	TACAGACCAATAGCAACAGTT	3.42833e-05	NI-NG-NI-NN-NI-HD-NS-NS-NN-NG-HD-NS-HD-NN-HD-HD-HD-NI-NG-NG	TAL20Xam668
Manes.01G138600.1.v7.0;pacid=41327207	226	+	0.315703	TAGAGACTAATCCATCTCACT	3.43311e-05	NI-NG-NI-NN-NI-HD-NS-NS-NN-NG-HD-NS-HD-NN-HD-HD-HD-NI-NG-NG	TAL20Xam668
Manes.14G061400.1.v7.0;pacid=41332011	54	+	0.315694	CAAGGACGAATAACTCCCACT	3.43424e-05	NI-NG-NI-NN-NI-HD-NS-NS-NN-NG-HD-NS-HD-NN-HD-HD-HD-NI-NG-NG	TAL20Xam668
Manes.05G025900.1.v7.0;pacid=41335070	53	+	0.315687	CATAAAAGTGACGCACGCATA	3.43526e-05	NI-NG-NI-NN-NI-HD-NS-NS-NN-NG-HD-NS-HD-NN-HD-HD-HD-NI-NG-NG	TAL20Xam668
Manes.05G180900.1.v7.0;pacid=41335942	164	+	0.315684	TATAAACCCATCTCAACTCCT	3.4356e-05	NI-NG-NI-NN-NI-HD-NS-NS-NN-NG-HD-NS-HD-NN-HD-HD-HD-NI-NG-NG	TAL20Xam668
Manes.17G036100.1.v7.0;pacid=41330489	59	-	0.315671	CATTAACATGTCCAAAACATT	3.43736e-05	NI-NG-NI-NN-NI-HD-NS-NS-NN-NG-HD-NS-HD-NN-HD-HD-HD-NI-NG-NG	TAL20Xam668
Manes.05G182700.1.v7.0;pacid=41335746	176	+	0.315668	CATTAACAAGCCTCACCCCTC	3.43775e-05	NI-NG-NI-NN-NI-HD-NS-NS-NN-NG-HD-NS-HD-NN-HD-HD-HD-NI-NG-NG	TAL20Xam668
Manes.16G134100.1.v7.0;pacid=41319271	178	+	0.315648	TATAGAAGGATCCATACTACT	3.44055e-05	NI-NG-NI-NN-NI-HD-NS-NS-NN-NG-HD-NS-HD-NN-HD-HD-HD-NI-NG-NG	TAL20Xam668
Manes.05G095400.1.v7.0;pacid=41336436	267	+	0.315637	TATCTACAAAACCCGCCCTAT	3.44196e-05	NI-NG-NI-NN-NI-HD-NS-NS-NN-NG-HD-NS-HD-NN-HD-HD-HD-NI-NG-NG	TAL20Xam668
Manes.06G087300.1.v7.0;pacid=41302970	104	+	0.315623	TATTGTCTTTTCAAACCCTTT	3.44387e-05	NI-NG-NI-NN-NI-HD-NS-NS-NN-NG-HD-NS-HD-NN-HD-HD-HD-NI-NG-NG	TAL20Xam668
Manes.01G040700.1.v7.0;pacid=41324757	230	+	0.315582	TTTTTAAAATTCGAACCCATT	3.44951e-05	NI-NG-NI-NN-NI-HD-NS-NS-NN-NG-HD-NS-HD-NN-HD-HD-HD-NI-NG-NG	TAL20Xam668
Manes.06G127900.1.v7.0;pacid=41303875	135	+	0.315539	TATAAAAACGCATCACCCACA	3.45531e-05	NI-NG-NI-NN-NI-HD-NS-NS-NN-NG-HD-NS-HD-NN-HD-HD-HD-NI-NG-NG	TAL20Xam668
Manes.07G121700.1.v7.0;pacid=41329079	274	+	0.315533	TAAAGACATTTCTTGCAAATT	3.45615e-05	NI-NG-NI-NN-NI-HD-NS-NS-NN-NG-HD-NS-HD-NN-HD-HD-HD-NI-NG-NG	TAL20Xam668
Manes.07G103700.1.v7.0;pacid=41327679	152	-	0.31553	CATAGTAAATTAACACACATT	3.45655e-05	NI-NG-NI-NN-NI-HD-NS-NS-NN-NG-HD-NS-HD-NN-HD-HD-HD-NI-NG-NG	TAL20Xam668
Manes.S111100.1.v7.0;pacid=41339204	194	-	0.315505	AATAAACAATTAACGCTCATA	3.45996e-05	NI-NG-NI-NN-NI-HD-NS-NS-NN-NG-HD-NS-HD-NN-HD-HD-HD-NI-NG-NG	TAL20Xam668
Manes.12G044800.1.v7.0;pacid=41323450	114	-	0.315495	CTTAGACGGATCCAGCCTTTT	3.46137e-05	NI-NG-NI-NN-NI-HD-NS-NS-NN-NG-HD-NS-HD-NN-HD-HD-HD-NI-NG-NG	TAL20Xam668
Manes.01G074400.1.v7.0;pacid=41326698	143	+	0.315471	TATACACAACACACACACACA	3.46466e-05	NI-NG-NI-NN-NI-HD-NS-NS-NN-NG-HD-NS-HD-NN-HD-HD-HD-NI-NG-NG	TAL20Xam668
Manes.12G022900.1.v7.0;pacid=41323094	216	-	0.315449	CAAAGACAAGGCAAGACCATA	3.46759e-05	NI-NG-NI-NN-NI-HD-NS-NS-NN-NG-HD-NS-HD-NN-HD-HD-HD-NI-NG-NG	TAL20Xam668
Manes.08G166500.1.v7.0;pacid=41313361	27	+	0.315441	TATAGCAATGTGATTCCCATT	3.46868e-05	NI-NG-NI-NN-NI-HD-NS-NS-NN-NG-HD-NS-HD-NN-HD-HD-HD-NI-NG-NG	TAL20Xam668
Manes.08G116200.1.v7.0;pacid=41312351	168	+	0.31539	TATATATGTATCAAGCCCTTC	3.47571e-05	NI-NG-NI-NN-NI-HD-NS-NS-NN-NG-HD-NS-HD-NN-HD-HD-HD-NI-NG-NG	TAL20Xam668
Manes.06G051600.1.v7.0;pacid=41304258	203	+	0.3153	TATAAACCCAAATCGTCCTTT	3.48804e-05	NI-NG-NI-NN-NI-HD-NS-NS-NN-NG-HD-NS-HD-NN-HD-HD-HD-NI-NG-NG	TAL20Xam668
Manes.06G105800.1.v7.0;pacid=41303421	271	+	0.315253	TGGAGAATCCTCTCACCCACT	3.49453e-05	NI-NG-NI-NN-NI-HD-NS-NS-NN-NG-HD-NS-HD-NN-HD-HD-HD-NI-NG-NG	TAL20Xam668
Manes.05G046000.1.v7.0;pacid=41336842	99	+	0.315218	AATAAACAATTAGCACCTATA	3.49925e-05	NI-NG-NI-NN-NI-HD-NS-NS-NN-NG-HD-NS-HD-NN-HD-HD-HD-NI-NG-NG	TAL20Xam668
Manes.05G046000.2.v7.0;pacid=41336843	99	+	0.315218	AATAAACAATTAGCACCTATA	3.49925e-05	NI-NG-NI-NN-NI-HD-NS-NS-NN-NG-HD-NS-HD-NN-HD-HD-HD-NI-NG-NG	TAL20Xam668
Manes.09G026200.1.v7.0;pacid=41311508	59	+	0.315199	TCTAGCTTGATCCCTCCCAAT	3.50189e-05	NI-NG-NI-NN-NI-HD-NS-NS-NN-NG-HD-NS-HD-NN-HD-HD-HD-NI-NG-NG	TAL20Xam668
Manes.03G010400.1.v7.0;pacid=41309840	4	+	0.315192	TTTACACTAGTCCCACTCAAA	3.50292e-05	NI-NG-NI-NN-NI-HD-NS-NS-NN-NG-HD-NS-HD-NN-HD-HD-HD-NI-NG-NG	TAL20Xam668
Manes.03G010400.2.v7.0;pacid=41309841	4	+	0.315192	TTTACACTAGTCCCACTCAAA	3.50292e-05	NI-NG-NI-NN-NI-HD-NS-NS-NN-NG-HD-NS-HD-NN-HD-HD-HD-NI-NG-NG	TAL20Xam668
Manes.07G118400.1.v7.0;pacid=41328891	152	-	0.315183	TATATACTTGTCAAGCTCTCT	3.50409e-05	NI-NG-NI-NN-NI-HD-NS-NS-NN-NG-HD-NS-HD-NN-HD-HD-HD-NI-NG-NG	TAL20Xam668
Manes.05G182300.1.v7.0;pacid=41335295	223	+	0.315179	CATCCCAAAAACCCGCCCATT	3.5047e-05	NI-NG-NI-NN-NI-HD-NS-NS-NN-NG-HD-NS-HD-NN-HD-HD-HD-NI-NG-NG	TAL20Xam668
Manes.17G106800.1.v7.0;pacid=41330075	212	+	0.315173	TATAAATAGAGCACGTCCATG	3.50551e-05	NI-NG-NI-NN-NI-HD-NS-NS-NN-NG-HD-NS-HD-NN-HD-HD-HD-NI-NG-NG	TAL20Xam668
Manes.08G030100.1.v7.0;pacid=41312561	376	-	0.315173	TATAGGCAAAGAACGACTATT	3.50556e-05	NI-NG-NI-NN-NI-HD-NS-NS-NN-NG-HD-NS-HD-NN-HD-HD-HD-NI-NG-NG	TAL20Xam668
Manes.04G102400.1.v7.0;pacid=41315364	218	+	0.315121	TCCAACCAGCTTCCACCCATT	3.51266e-05	NI-NG-NI-NN-NI-HD-NS-NS-NN-NG-HD-NS-HD-NN-HD-HD-HD-NI-NG-NG	TAL20Xam668
Manes.14G119600.1.v7.0;pacid=41332481	172	-	0.315106	ACCAGACCCGCCACGCCAATT	3.51481e-05	NI-NG-NI-NN-NI-HD-NS-NS-NN-NG-HD-NS-HD-NN-HD-HD-HD-NI-NG-NG	TAL20Xam668
Manes.06G062500.1.v7.0;pacid=41304652	67	+	0.315103	TATAAACTTATCGCGATTTTT	3.51517e-05	NI-NG-NI-NN-NI-HD-NS-NS-NN-NG-HD-NS-HD-NN-HD-HD-HD-NI-NG-NG	TAL20Xam668
Manes.13G093400.1.v7.0;pacid=41337594	148	-	0.315092	TGTTCACCACTCTAGACCATT	3.51672e-05	NI-NG-NI-NN-NI-HD-NS-NS-NN-NG-HD-NS-HD-NN-HD-HD-HD-NI-NG-NG	TAL20Xam668
Manes.07G001300.1.v7.0;pacid=41328564	161	+	0.315077	TATATACGGAAATTGCCCTTT	3.51879e-05	NI-NG-NI-NN-NI-HD-NS-NS-NN-NG-HD-NS-HD-NN-HD-HD-HD-NI-NG-NG	TAL20Xam668
Manes.07G001300.2.v7.0;pacid=41328565	170	+	0.315077	TATATACGGAAATTGCCCTTT	3.51879e-05	NI-NG-NI-NN-NI-HD-NS-NS-NN-NG-HD-NS-HD-NN-HD-HD-HD-NI-NG-NG	TAL20Xam668
Manes.07G001300.3.v7.0;pacid=41328568	161	+	0.315077	TATATACGGAAATTGCCCTTT	3.51879e-05	NI-NG-NI-NN-NI-HD-NS-NS-NN-NG-HD-NS-HD-NN-HD-HD-HD-NI-NG-NG	TAL20Xam668
Manes.06G141100.1.v7.0;pacid=41304453	214	-	0.315053	TATAGATGAAATAAGACCATT	3.52217e-05	NI-NG-NI-NN-NI-HD-NS-NS-NN-NG-HD-NS-HD-NN-HD-HD-HD-NI-NG-NG	TAL20Xam668
Manes.03G038400.1.v7.0;pacid=41308900	148	+	0.315047	TAGAGACGTCTCGTGTCCGTT	3.52294e-05	NI-NG-NI-NN-NI-HD-NS-NS-NN-NG-HD-NS-HD-NN-HD-HD-HD-NI-NG-NG	TAL20Xam668
Manes.17G073900.1.v7.0;pacid=41329923	322	+	0.315046	TATAAAAAAAAAACGCCTCTT	3.52315e-05	NI-NG-NI-NN-NI-HD-NS-NS-NN-NG-HD-NS-HD-NN-HD-HD-HD-NI-NG-NG	TAL20Xam668
Manes.01G262000.1.v7.0;pacid=41324932	423	-	0.315036	TGTATACATGTCGAGTGCATT	3.52446e-05	NI-NG-NI-NN-NI-HD-NS-NS-NN-NG-HD-NS-HD-NN-HD-HD-HD-NI-NG-NG	TAL20Xam668
Manes.13G027200.1.v7.0;pacid=41338634	134	+	0.314983	AAGAGTCGCGGCTAGCCCATT	3.53181e-05	NI-NG-NI-NN-NI-HD-NS-NS-NN-NG-HD-NS-HD-NN-HD-HD-HD-NI-NG-NG	TAL20Xam668
Manes.09G020500.1.v7.0;pacid=41311389	274	-	0.314965	AACGGACTTCTCAAACCCATT	3.53442e-05	NI-NG-NI-NN-NI-HD-NS-NS-NN-NG-HD-NS-HD-NN-HD-HD-HD-NI-NG-NG	TAL20Xam668
Manes.18G071100.2.v7.0;pacid=41333850	81	-	0.314943	CATAGATGGGATCTGCCCATT	3.53737e-05	NI-NG-NI-NN-NI-HD-NS-NS-NN-NG-HD-NS-HD-NN-HD-HD-HD-NI-NG-NG	TAL20Xam668
Manes.03G135600.2.v7.0;pacid=41307882	284	+	0.314936	TGTACACAGGTAATTCCCGTT	3.53838e-05	NI-NG-NI-NN-NI-HD-NS-NS-NN-NG-HD-NS-HD-NN-HD-HD-HD-NI-NG-NG	TAL20Xam668
Manes.07G014800.1.v7.0;pacid=41329182	194	-	0.314903	TAATTACATGTCCAACCAATT	3.54301e-05	NI-NG-NI-NN-NI-HD-NS-NS-NN-NG-HD-NS-HD-NN-HD-HD-HD-NI-NG-NG	TAL20Xam668
Manes.07G110500.1.v7.0;pacid=41328086	363	+	0.314868	AAAAAACAAATAAAGCCCAAT	3.54788e-05	NI-NG-NI-NN-NI-HD-NS-NS-NN-NG-HD-NS-HD-NN-HD-HD-HD-NI-NG-NG	TAL20Xam668
Manes.07G110500.2.v7.0;pacid=41328087	363	+	0.314868	AAAAAACAAATAAAGCCCAAT	3.54788e-05	NI-NG-NI-NN-NI-HD-NS-NS-NN-NG-HD-NS-HD-NN-HD-HD-HD-NI-NG-NG	TAL20Xam668
Manes.05G153100.1.v7.0;pacid=41334958	76	-	0.314804	CATTAATTGGTAAAACCCATT	3.55683e-05	NI-NG-NI-NN-NI-HD-NS-NS-NN-NG-HD-NS-HD-NN-HD-HD-HD-NI-NG-NG	TAL20Xam668
Manes.08G109400.1.v7.0;pacid=41313001	164	+	0.314804	TATAAATACCCCCAACCCATC	3.55687e-05	NI-NG-NI-NN-NI-HD-NS-NS-NN-NG-HD-NS-HD-NN-HD-HD-HD-NI-NG-NG	TAL20Xam668
Manes.01G195400.1.v7.0;pacid=41326033	235	+	0.314691	CAAAACCAAATCCTCCCCATT	3.57275e-05	NI-NG-NI-NN-NI-HD-NS-NS-NN-NG-HD-NS-HD-NN-HD-HD-HD-NI-NG-NG	TAL20Xam668
Manes.09G085700.1.v7.0;pacid=41311074	265	+	0.31468	TAAACAATTCCAACACCCATT	3.57422e-05	NI-NG-NI-NN-NI-HD-NS-NS-NN-NG-HD-NS-HD-NN-HD-HD-HD-NI-NG-NG	TAL20Xam668
Manes.09G085700.2.v7.0;pacid=41311076	222	+	0.31468	TAAACAATTCCAACACCCATT	3.57422e-05	NI-NG-NI-NN-NI-HD-NS-NS-NN-NG-HD-NS-HD-NN-HD-HD-HD-NI-NG-NG	TAL20Xam668
Manes.04G007100.1.v7.0;pacid=41315021	120	-	0.314625	TATAAAAGAAAAATGACCATT	3.58204e-05	NI-NG-NI-NN-NI-HD-NS-NS-NN-NG-HD-NS-HD-NN-HD-HD-HD-NI-NG-NG	TAL20Xam668
Manes.04G007100.2.v7.0;pacid=41315022	120	-	0.314625	TATAAAAGAAAAATGACCATT	3.58204e-05	NI-NG-NI-NN-NI-HD-NS-NS-NN-NG-HD-NS-HD-NN-HD-HD-HD-NI-NG-NG	TAL20Xam668
Manes.08G102200.1.v7.0;pacid=41313198	355	-	0.314625	TCAGCAATAGTCGCCCCCATT	3.58205e-05	NI-NG-NI-NN-NI-HD-NS-NS-NN-NG-HD-NS-HD-NN-HD-HD-HD-NI-NG-NG	TAL20Xam668
Manes.08G102200.2.v7.0;pacid=41313199	355	-	0.314625	TCAGCAATAGTCGCCCCCATT	3.58205e-05	NI-NG-NI-NN-NI-HD-NS-NS-NN-NG-HD-NS-HD-NN-HD-HD-HD-NI-NG-NG	TAL20Xam668
Manes.03G142900.1.v7.0;pacid=41307924	294	+	0.314624	AATCAACGTTTCCTTCCCATT	3.58211e-05	NI-NG-NI-NN-NI-HD-NS-NS-NN-NG-HD-NS-HD-NN-HD-HD-HD-NI-NG-NG	TAL20Xam668
Manes.13G119800.1.v7.0;pacid=41338112	241	+	0.314582	TGAAGCCAAATCCAGCCCATG	3.5881e-05	NI-NG-NI-NN-NI-HD-NS-NS-NN-NG-HD-NS-HD-NN-HD-HD-HD-NI-NG-NG	TAL20Xam668
Manes.04G078500.1.v7.0;pacid=41316144	20	-	0.314579	TTTAGACTATTAACACCAATG	3.58854e-05	NI-NG-NI-NN-NI-HD-NS-NS-NN-NG-HD-NS-HD-NN-HD-HD-HD-NI-NG-NG	TAL20Xam668
Manes.16G135900.1.v7.0;pacid=41319156	228	-	0.314563	CATACACATCACCCGCCCAAA	3.59076e-05	NI-NG-NI-NN-NI-HD-NS-NS-NN-NG-HD-NS-HD-NN-HD-HD-HD-NI-NG-NG	TAL20Xam668
Manes.05G207000.1.v7.0;pacid=41335125	3	+	0.314526	TAGAAACAATTTAAGCCTATT	3.59592e-05	NI-NG-NI-NN-NI-HD-NS-NS-NN-NG-HD-NS-HD-NN-HD-HD-HD-NI-NG-NG	TAL20Xam668
Manes.05G207000.2.v7.0;pacid=41335126	3	+	0.314526	TAGAAACAATTTAAGCCTATT	3.59592e-05	NI-NG-NI-NN-NI-HD-NS-NS-NN-NG-HD-NS-HD-NN-HD-HD-HD-NI-NG-NG	TAL20Xam668
Manes.10G092300.1.v7.0;pacid=41321714	155	+	0.314519	TTACGATGAGTCCTGCCCATT	3.59694e-05	NI-NG-NI-NN-NI-HD-NS-NS-NN-NG-HD-NS-HD-NN-HD-HD-HD-NI-NG-NG	TAL20Xam668
Manes.06G033800.1.v7.0;pacid=41304443	222	+	0.314509	TTTAAACTAAACACACAAATT	3.5984e-05	NI-NG-NI-NN-NI-HD-NS-NS-NN-NG-HD-NS-HD-NN-HD-HD-HD-NI-NG-NG	TAL20Xam668
Manes.17G046300.1.v7.0;pacid=41330095	123	-	0.3145	TCTGGACATCTAGCGACCAAT	3.59962e-05	NI-NG-NI-NN-NI-HD-NS-NS-NN-NG-HD-NS-HD-NN-HD-HD-HD-NI-NG-NG	TAL20Xam668
Manes.16G133300.1.v7.0;pacid=41320144	4	+	0.314464	TAACAAATGGTCCAACCAATT	3.60478e-05	NI-NG-NI-NN-NI-HD-NS-NS-NN-NG-HD-NS-HD-NN-HD-HD-HD-NI-NG-NG	TAL20Xam668
Manes.05G070200.1.v7.0;pacid=41335710	190	+	0.314432	CCTATACATATCATACCCCTT	3.60933e-05	NI-NG-NI-NN-NI-HD-NS-NS-NN-NG-HD-NS-HD-NN-HD-HD-HD-NI-NG-NG	TAL20Xam668
Manes.01G173500.1.v7.0;pacid=41324671	92	-	0.314396	TATAGAAAAATACTAACAATT	3.61439e-05	NI-NG-NI-NN-NI-HD-NS-NS-NN-NG-HD-NS-HD-NN-HD-HD-HD-NI-NG-NG	TAL20Xam668
Manes.01G173500.2.v7.0;pacid=41324672	92	-	0.314396	TATAGAAAAATACTAACAATT	3.61439e-05	NI-NG-NI-NN-NI-HD-NS-NS-NN-NG-HD-NS-HD-NN-HD-HD-HD-NI-NG-NG	TAL20Xam668
Manes.06G051500.1.v7.0;pacid=41304806	189	+	0.314394	TAAAAACCCATCAATCCCACC	3.61463e-05	NI-NG-NI-NN-NI-HD-NS-NS-NN-NG-HD-NS-HD-NN-HD-HD-HD-NI-NG-NG	TAL20Xam668
Manes.10G070300.1.v7.0;pacid=41321357	240	-	0.314366	TATACTATGGTCAAGCACACT	3.61867e-05	NI-NG-NI-NN-NI-HD-NS-NS-NN-NG-HD-NS-HD-NN-HD-HD-HD-NI-NG-NG	TAL20Xam668
Manes.03G014900.1.v7.0;pacid=41309227	88	-	0.314334	TCAAACAGAGCCACACCCATT	3.62323e-05	NI-NG-NI-NN-NI-HD-NS-NS-NN-NG-HD-NS-HD-NN-HD-HD-HD-NI-NG-NG	TAL20Xam668
Manes.09G081500.1.v7.0;pacid=41310652	109	-	0.314328	TTTGAAATAATCTCAACCATT	3.62406e-05	NI-NG-NI-NN-NI-HD-NS-NS-NN-NG-HD-NS-HD-NN-HD-HD-HD-NI-NG-NG	TAL20Xam668
Manes.11G116900.1.v7.0;pacid=41317097	96	+	0.314171	CACATCCTAGTCTCTCCAATT	3.64652e-05	NI-NG-NI-NN-NI-HD-NS-NS-NN-NG-HD-NS-HD-NN-HD-HD-HD-NI-NG-NG	TAL20Xam668
Manes.09G046400.1.v7.0;pacid=41311730	107	+	0.314164	TATTGGCCAACCAAGCTCATT	3.64755e-05	NI-NG-NI-NN-NI-HD-NS-NS-NN-NG-HD-NS-HD-NN-HD-HD-HD-NI-NG-NG	TAL20Xam668
Manes.12G027300.1.v7.0;pacid=41323814	71	-	0.314158	AATAAACCGGTCACCGCGATT	3.6484e-05	NI-NG-NI-NN-NI-HD-NS-NS-NN-NG-HD-NS-HD-NN-HD-HD-HD-NI-NG-NG	TAL20Xam668
Manes.05G018700.1.v7.0;pacid=41336483	332	+	0.314063	CATAGAAGCCAAGCCCCAATT	3.66203e-05	NI-NG-NI-NN-NI-HD-NS-NS-NN-NG-HD-NS-HD-NN-HD-HD-HD-NI-NG-NG	TAL20Xam668
Manes.01G067600.1.v7.0;pacid=41326933	183	+	0.314053	TCCACACGCGTTGAGCCCATA	3.66343e-05	NI-NG-NI-NN-NI-HD-NS-NS-NN-NG-HD-NS-HD-NN-HD-HD-HD-NI-NG-NG	TAL20Xam668
Manes.01G005700.1.v7.0;pacid=41325822	23	-	0.314035	TATATAATTGTATCACCAAAT	3.66606e-05	NI-NG-NI-NN-NI-HD-NS-NS-NN-NG-HD-NS-HD-NN-HD-HD-HD-NI-NG-NG	TAL20Xam668
Manes.02G177800.1.v7.0;pacid=41339520	167	-	0.314012	TACAAACAGTTAGCGTCCGTT	3.6694e-05	NI-NG-NI-NN-NI-HD-NS-NS-NN-NG-HD-NS-HD-NN-HD-HD-HD-NI-NG-NG	TAL20Xam668
Manes.16G116200.1.v7.0;pacid=41318992	65	+	0.314	TAAACGCACATCACGCGCATA	3.67113e-05	NI-NG-NI-NN-NI-HD-NS-NS-NN-NG-HD-NS-HD-NN-HD-HD-HD-NI-NG-NG	TAL20Xam668
Manes.03G108800.1.v7.0;pacid=41309414	52	+	0.313964	TATAGAAGAGTCAAGAGTATA	3.67637e-05	NI-NG-NI-NN-NI-HD-NS-NS-NN-NG-HD-NS-HD-NN-HD-HD-HD-NI-NG-NG	TAL20Xam668
Manes.14G170500.1.v7.0;pacid=41331141	168	+	0.313957	TATAGATGACTTCCCACCAAT	3.67736e-05	NI-NG-NI-NN-NI-HD-NS-NS-NN-NG-HD-NS-HD-NN-HD-HD-HD-NI-NG-NG	TAL20Xam668
Manes.15G086100.1.v7.0;pacid=41305440	66	+	0.313955	TGCAGACTTGAAACACCCATC	3.67767e-05	NI-NG-NI-NN-NI-HD-NS-NS-NN-NG-HD-NS-HD-NN-HD-HD-HD-NI-NG-NG	TAL20Xam668
Manes.01G194300.1.v7.0;pacid=41326751	260	+	0.31395	CATAGACACTACGAACCCACA	3.67838e-05	NI-NG-NI-NN-NI-HD-NS-NS-NN-NG-HD-NS-HD-NN-HD-HD-HD-NI-NG-NG	TAL20Xam668
Manes.03G178600.1.v7.0;pacid=41307836	131	-	0.313926	TAAATACGGTTATCGGCCATT	3.68177e-05	NI-NG-NI-NN-NI-HD-NS-NS-NN-NG-HD-NS-HD-NN-HD-HD-HD-NI-NG-NG	TAL20Xam668
Manes.16G021300.1.v7.0;pacid=41320133	180	+	0.313829	TATAAAACGACAACGCCCACG	3.69592e-05	NI-NG-NI-NN-NI-HD-NS-NS-NN-NG-HD-NS-HD-NN-HD-HD-HD-NI-NG-NG	TAL20Xam668
Manes.12G085500.1.v7.0;pacid=41323161	272	+	0.313822	AACAGACTGGTAGATCCCTTT	3.69692e-05	NI-NG-NI-NN-NI-HD-NS-NS-NN-NG-HD-NS-HD-NN-HD-HD-HD-NI-NG-NG	TAL20Xam668
Manes.03G183100.1.v7.0;pacid=41307474	83	-	0.313775	TATAAATAACTCCAGCACATG	3.70376e-05	NI-NG-NI-NN-NI-HD-NS-NS-NN-NG-HD-NS-HD-NN-HD-HD-HD-NI-NG-NG	TAL20Xam668
Manes.02G148800.1.v7.0;pacid=41340176	158	+	0.313764	TATATAAATATACCCACCCTT	3.70529e-05	NI-NG-NI-NN-NI-HD-NS-NS-NN-NG-HD-NS-HD-NN-HD-HD-HD-NI-NG-NG	TAL20Xam668
Manes.15G014100.1.v7.0;pacid=41305625	263	+	0.313722	CATATCCCCTTTCCTCCCATT	3.7114e-05	NI-NG-NI-NN-NI-HD-NS-NS-NN-NG-HD-NS-HD-NN-HD-HD-HD-NI-NG-NG	TAL20Xam668
Manes.17G082100.1.v7.0;pacid=41329686	187	-	0.313709	CATAGATCAATCTCTCCACTT	3.71337e-05	NI-NG-NI-NN-NI-HD-NS-NS-NN-NG-HD-NS-HD-NN-HD-HD-HD-NI-NG-NG	TAL20Xam668
Manes.17G082100.2.v7.0;pacid=41329687	187	-	0.313709	CATAGATCAATCTCTCCACTT	3.71337e-05	NI-NG-NI-NN-NI-HD-NS-NS-NN-NG-HD-NS-HD-NN-HD-HD-HD-NI-NG-NG	TAL20Xam668
Manes.17G082100.3.v7.0;pacid=41329688	187	-	0.313709	CATAGATCAATCTCTCCACTT	3.71337e-05	NI-NG-NI-NN-NI-HD-NS-NS-NN-NG-HD-NS-HD-NN-HD-HD-HD-NI-NG-NG	TAL20Xam668
Manes.17G082100.4.v7.0;pacid=41329689	187	-	0.313709	CATAGATCAATCTCTCCACTT	3.71337e-05	NI-NG-NI-NN-NI-HD-NS-NS-NN-NG-HD-NS-HD-NN-HD-HD-HD-NI-NG-NG	TAL20Xam668
Manes.06G098100.1.v7.0;pacid=41303734	443	+	0.313708	CAGAAACAGGTAAACCTCATT	3.71353e-05	NI-NG-NI-NN-NI-HD-NS-NS-NN-NG-HD-NS-HD-NN-HD-HD-HD-NI-NG-NG	TAL20Xam668
Manes.10G080000.1.v7.0;pacid=41321036	201	+	0.313624	TATAAACCCTTTCCTCCACTT	3.72571e-05	NI-NG-NI-NN-NI-HD-NS-NS-NN-NG-HD-NS-HD-NN-HD-HD-HD-NI-NG-NG	TAL20Xam668
Manes.06G176300.1.v7.0;pacid=41304573	50	+	0.313554	TTTAACCCTCTCTCTCCTATT	3.73595e-05	NI-NG-NI-NN-NI-HD-NS-NS-NN-NG-HD-NS-HD-NN-HD-HD-HD-NI-NG-NG	TAL20Xam668
Manes.06G176300.2.v7.0;pacid=41304574	50	+	0.313554	TTTAACCCTCTCTCTCCTATT	3.73595e-05	NI-NG-NI-NN-NI-HD-NS-NS-NN-NG-HD-NS-HD-NN-HD-HD-HD-NI-NG-NG	TAL20Xam668
Manes.08G023200.1.v7.0;pacid=41313016	268	+	0.313475	TATAAATATATCTAACCAATC	3.74767e-05	NI-NG-NI-NN-NI-HD-NS-NS-NN-NG-HD-NS-HD-NN-HD-HD-HD-NI-NG-NG	TAL20Xam668
Manes.07G051000.1.v7.0;pacid=41327820	159	-	0.313456	TATCTAAAATTCGAACCCAAT	3.75034e-05	NI-NG-NI-NN-NI-HD-NS-NS-NN-NG-HD-NS-HD-NN-HD-HD-HD-NI-NG-NG	TAL20Xam668
Manes.13G146900.1.v7.0;pacid=41338079	184	+	0.313438	TTCAAACATTTCACAACCATC	3.753e-05	NI-NG-NI-NN-NI-HD-NS-NS-NN-NG-HD-NS-HD-NN-HD-HD-HD-NI-NG-NG	TAL20Xam668
Manes.S070300.1.v7.0;pacid=41323538	86	+	0.313434	TCTACTCGACCCGCACCTATT	3.75361e-05	NI-NG-NI-NN-NI-HD-NS-NS-NN-NG-HD-NS-HD-NN-HD-HD-HD-NI-NG-NG	TAL20Xam668
Manes.01G039300.1.v7.0;pacid=41325159	276	+	0.3134	CATCCACACTTCCAATCCATT	3.75862e-05	NI-NG-NI-NN-NI-HD-NS-NS-NN-NG-HD-NS-HD-NN-HD-HD-HD-NI-NG-NG	TAL20Xam668
Manes.16G060400.1.v7.0;pacid=41318917	137	+	0.313388	AAAATTCCTGTCTCGCCCATC	3.76039e-05	NI-NG-NI-NN-NI-HD-NS-NS-NN-NG-HD-NS-HD-NN-HD-HD-HD-NI-NG-NG	TAL20Xam668
Manes.04G022700.2.v7.0;pacid=41315729	222	-	0.313326	CTTAGAATCTTCCAGACCATT	3.76963e-05	NI-NG-NI-NN-NI-HD-NS-NS-NN-NG-HD-NS-HD-NN-HD-HD-HD-NI-NG-NG	TAL20Xam668
Manes.17G073700.1.v7.0;pacid=41330385	69	+	0.313267	CATAGAAGTGTCAAGCCTCTG	3.77837e-05	NI-NG-NI-NN-NI-HD-NS-NS-NN-NG-HD-NS-HD-NN-HD-HD-HD-NI-NG-NG	TAL20Xam668
Manes.17G073700.2.v7.0;pacid=41330386	69	+	0.313267	CATAGAAGTGTCAAGCCTCTG	3.77837e-05	NI-NG-NI-NN-NI-HD-NS-NS-NN-NG-HD-NS-HD-NN-HD-HD-HD-NI-NG-NG	TAL20Xam668
Manes.06G148200.1.v7.0;pacid=41303167	105	+	0.313244	CATACATCAGCAACGCCCGTT	3.78176e-05	NI-NG-NI-NN-NI-HD-NS-NS-NN-NG-HD-NS-HD-NN-HD-HD-HD-NI-NG-NG	TAL20Xam668
Manes.05G076700.1.v7.0;pacid=41335415	233	+	0.313193	TATTCACCCCTCACAACCACA	3.78926e-05	NI-NG-NI-NN-NI-HD-NS-NS-NN-NG-HD-NS-HD-NN-HD-HD-HD-NI-NG-NG	TAL20Xam668
Manes.10G086000.1.v7.0;pacid=41321723	139	+	0.313192	TATATATACACCCCCCCCAGT	3.78945e-05	NI-NG-NI-NN-NI-HD-NS-NS-NN-NG-HD-NS-HD-NN-HD-HD-HD-NI-NG-NG	TAL20Xam668
Manes.05G184500.1.v7.0;pacid=41336002	203	+	0.31315	TATAAACGAACCACTCTCCCT	3.79569e-05	NI-NG-NI-NN-NI-HD-NS-NS-NN-NG-HD-NS-HD-NN-HD-HD-HD-NI-NG-NG	TAL20Xam668
Manes.06G130200.1.v7.0;pacid=41303535	215	+	0.31314	TAAAGCCATGCCACACCAAGT	3.79715e-05	NI-NG-NI-NN-NI-HD-NS-NS-NN-NG-HD-NS-HD-NN-HD-HD-HD-NI-NG-NG	TAL20Xam668
Manes.14G100700.1.v7.0;pacid=41330936	200	+	0.31303	TCTCAACCATCCCCGCCTATT	3.81355e-05	NI-NG-NI-NN-NI-HD-NS-NS-NN-NG-HD-NS-HD-NN-HD-HD-HD-NI-NG-NG	TAL20Xam668
Manes.15G050400.1.v7.0;pacid=41305519	312	+	0.313002	TATACACTAACCACACACAAA	3.81773e-05	NI-NG-NI-NN-NI-HD-NS-NS-NN-NG-HD-NS-HD-NN-HD-HD-HD-NI-NG-NG	TAL20Xam668
Manes.09G024300.1.v7.0;pacid=41311994	183	-	0.312977	GAGAAACAAATCACTCCCAAT	3.82157e-05	NI-NG-NI-NN-NI-HD-NS-NS-NN-NG-HD-NS-HD-NN-HD-HD-HD-NI-NG-NG	TAL20Xam668
Manes.14G047600.1.v7.0;pacid=41332636	250	+	0.312959	TATAAATACGTCACATTCTTT	3.82423e-05	NI-NG-NI-NN-NI-HD-NS-NS-NN-NG-HD-NS-HD-NN-HD-HD-HD-NI-NG-NG	TAL20Xam668
Manes.03G200300.2.v7.0;pacid=41307790	147	+	0.312918	CTTAGAATTATCAATACCATT	3.83039e-05	NI-NG-NI-NN-NI-HD-NS-NS-NN-NG-HD-NS-HD-NN-HD-HD-HD-NI-NG-NG	TAL20Xam668
Manes.12G017000.1.v7.0;pacid=41323234	239	-	0.312915	TTGAGGCCAATCACCACCATT	3.83088e-05	NI-NG-NI-NN-NI-HD-NS-NS-NN-NG-HD-NS-HD-NN-HD-HD-HD-NI-NG-NG	TAL20Xam668
Manes.15G049400.1.v7.0;pacid=41305831	194	+	0.312869	TATAGCCAAAACACACACACC	3.83771e-05	NI-NG-NI-NN-NI-HD-NS-NS-NN-NG-HD-NS-HD-NN-HD-HD-HD-NI-NG-NG	TAL20Xam668
Manes.17G021100.1.v7.0;pacid=41329749	201	+	0.312865	TATAAAAGACTAACAAACATA	3.83834e-05	NI-NG-NI-NN-NI-HD-NS-NS-NN-NG-HD-NS-HD-NN-HD-HD-HD-NI-NG-NG	TAL20Xam668
Manes.11G069900.1.v7.0;pacid=41318271	224	+	0.312824	TATGAACTACAAAATCCCATT	3.84458e-05	NI-NG-NI-NN-NI-HD-NS-NS-NN-NG-HD-NS-HD-NN-HD-HD-HD-NI-NG-NG	TAL20Xam668
Manes.11G069900.4.v7.0;pacid=41318272	224	+	0.312824	TATGAACTACAAAATCCCATT	3.84458e-05	NI-NG-NI-NN-NI-HD-NS-NS-NN-NG-HD-NS-HD-NN-HD-HD-HD-NI-NG-NG	TAL20Xam668
Manes.11G027200.1.v7.0;pacid=41317291	477	-	0.312759	TATAGATGCTTCTCTCTCTTT	3.85434e-05	NI-NG-NI-NN-NI-HD-NS-NS-NN-NG-HD-NS-HD-NN-HD-HD-HD-NI-NG-NG	TAL20Xam668
Manes.15G041700.1.v7.0;pacid=41306406	353	-	0.312758	TGAAAGCGCGTCCCACCCTTT	3.85444e-05	NI-NG-NI-NN-NI-HD-NS-NS-NN-NG-HD-NS-HD-NN-HD-HD-HD-NI-NG-NG	TAL20Xam668
Manes.08G116100.1.v7.0;pacid=41312564	251	+	0.31274	TATAGATCGATCCAAACCCTC	3.85715e-05	NI-NG-NI-NN-NI-HD-NS-NS-NN-NG-HD-NS-HD-NN-HD-HD-HD-NI-NG-NG	TAL20Xam668
Manes.08G116100.2.v7.0;pacid=41312565	251	+	0.31274	TATAGATCGATCCAAACCCTC	3.85715e-05	NI-NG-NI-NN-NI-HD-NS-NS-NN-NG-HD-NS-HD-NN-HD-HD-HD-NI-NG-NG	TAL20Xam668
Manes.07G080000.1.v7.0;pacid=41327756	44	+	0.312711	TATACAAGCAACTCTACCCTT	3.8616e-05	NI-NG-NI-NN-NI-HD-NS-NS-NN-NG-HD-NS-HD-NN-HD-HD-HD-NI-NG-NG	TAL20Xam668
Manes.14G154300.1.v7.0;pacid=41332543	247	+	0.312706	TTTAAACACATCTAATCCATA	3.86229e-05	NI-NG-NI-NN-NI-HD-NS-NS-NN-NG-HD-NS-HD-NN-HD-HD-HD-NI-NG-NG	TAL20Xam668
Manes.14G154300.2.v7.0;pacid=41332544	247	+	0.312706	TTTAAACACATCTAATCCATA	3.86229e-05	NI-NG-NI-NN-NI-HD-NS-NS-NN-NG-HD-NS-HD-NN-HD-HD-HD-NI-NG-NG	TAL20Xam668
Manes.17G070600.1.v7.0;pacid=41330854	228	+	0.312684	CACTCACTAGACAAACCCATT	3.86574e-05	NI-NG-NI-NN-NI-HD-NS-NS-NN-NG-HD-NS-HD-NN-HD-HD-HD-NI-NG-NG	TAL20Xam668
Manes.09G066400.1.v7.0;pacid=41311128	108	-	0.312662	CATAGACAAATAGTACCCAGC	3.86901e-05	NI-NG-NI-NN-NI-HD-NS-NS-NN-NG-HD-NS-HD-NN-HD-HD-HD-NI-NG-NG	TAL20Xam668
Manes.08G115600.1.v7.0;pacid=41312803	270	+	0.312638	TCTCGTCGTCTCTCTCCCATC	3.87265e-05	NI-NG-NI-NN-NI-HD-NS-NS-NN-NG-HD-NS-HD-NN-HD-HD-HD-NI-NG-NG	TAL20Xam668
Manes.08G115600.2.v7.0;pacid=41312804	325	+	0.312638	TCTCGTCGTCTCTCTCCCATC	3.87265e-05	NI-NG-NI-NN-NI-HD-NS-NS-NN-NG-HD-NS-HD-NN-HD-HD-HD-NI-NG-NG	TAL20Xam668
Manes.13G004000.1.v7.0;pacid=41339000	227	+	0.312592	TAGAAACGAAGAGAGCCCATC	3.87968e-05	NI-NG-NI-NN-NI-HD-NS-NS-NN-NG-HD-NS-HD-NN-HD-HD-HD-NI-NG-NG	TAL20Xam668
Manes.01G213300.1.v7.0;pacid=41325128	129	+	0.312493	TATAGATAAATCATGGACATT	3.89474e-05	NI-NG-NI-NN-NI-HD-NS-NS-NN-NG-HD-NS-HD-NN-HD-HD-HD-NI-NG-NG	TAL20Xam668
Manes.01G213300.2.v7.0;pacid=41325129	129	+	0.312493	TATAGATAAATCATGGACATT	3.89474e-05	NI-NG-NI-NN-NI-HD-NS-NS-NN-NG-HD-NS-HD-NN-HD-HD-HD-NI-NG-NG	TAL20Xam668
Manes.07G036100.1.v7.0;pacid=41328023	35	-	0.312444	GATCGACAACTTACGCCCAAT	3.90216e-05	NI-NG-NI-NN-NI-HD-NS-NS-NN-NG-HD-NS-HD-NN-HD-HD-HD-NI-NG-NG	TAL20Xam668
Manes.07G036400.1.v7.0;pacid=41328420	16	-	0.312444	GATCGACAACTTACGCCCAAT	3.90216e-05	NI-NG-NI-NN-NI-HD-NS-NS-NN-NG-HD-NS-HD-NN-HD-HD-HD-NI-NG-NG	TAL20Xam668
Manes.12G039000.1.v7.0;pacid=41322594	182	+	0.312411	TTTAATCAAATCCCACCAAGT	3.90718e-05	NI-NG-NI-NN-NI-HD-NS-NS-NN-NG-HD-NS-HD-NN-HD-HD-HD-NI-NG-NG	TAL20Xam668
Manes.17G045600.1.v7.0;pacid=41329437	82	-	0.312386	TATGGACAGGCCCCGCAGAAT	3.91109e-05	NI-NG-NI-NN-NI-HD-NS-NS-NN-NG-HD-NS-HD-NN-HD-HD-HD-NI-NG-NG	TAL20Xam668
Manes.05G168400.1.v7.0;pacid=41336124	278	+	0.312338	TACATAAATCTCATGCCCATC	3.91847e-05	NI-NG-NI-NN-NI-HD-NS-NS-NN-NG-HD-NS-HD-NN-HD-HD-HD-NI-NG-NG	TAL20Xam668
Manes.07G068800.1.v7.0;pacid=41328995	37	+	0.312318	AACAGAATCATCCAGCACATT	3.92156e-05	NI-NG-NI-NN-NI-HD-NS-NS-NN-NG-HD-NS-HD-NN-HD-HD-HD-NI-NG-NG	TAL20Xam668
Manes.13G011800.1.v7.0;pacid=41338523	205	+	0.312207	TGTAGATTAGTCGAGTCTATT	3.93861e-05	NI-NG-NI-NN-NI-HD-NS-NS-NN-NG-HD-NS-HD-NN-HD-HD-HD-NI-NG-NG	TAL20Xam668
Manes.13G011800.2.v7.0;pacid=41338524	205	+	0.312207	TGTAGATTAGTCGAGTCTATT	3.93861e-05	NI-NG-NI-NN-NI-HD-NS-NS-NN-NG-HD-NS-HD-NN-HD-HD-HD-NI-NG-NG	TAL20Xam668
Manes.16G085800.1.v7.0;pacid=41318691	45	+	0.312185	TTTATTCTTGTAGCATCCATT	3.94205e-05	NI-NG-NI-NN-NI-HD-NS-NS-NN-NG-HD-NS-HD-NN-HD-HD-HD-NI-NG-NG	TAL20Xam668
Manes.11G159800.1.v7.0;pacid=41318577	184	+	0.312177	AGAAATCAGGTCCAGCCCATT	3.94322e-05	NI-NG-NI-NN-NI-HD-NS-NS-NN-NG-HD-NS-HD-NN-HD-HD-HD-NI-NG-NG	TAL20Xam668
Manes.08G024900.1.v7.0;pacid=41313142	97	+	0.312135	CATACACTTGTCACTTACCTT	3.94967e-05	NI-NG-NI-NN-NI-HD-NS-NS-NN-NG-HD-NS-HD-NN-HD-HD-HD-NI-NG-NG	TAL20Xam668
Manes.09G061000.1.v7.0;pacid=41310750	102	+	0.312121	CTCACAAGGGTCCCACCCATG	3.95184e-05	NI-NG-NI-NN-NI-HD-NS-NS-NN-NG-HD-NS-HD-NN-HD-HD-HD-NI-NG-NG	TAL20Xam668
Manes.09G061000.3.v7.0;pacid=41310751	102	+	0.312121	CTCACAAGGGTCCCACCCATG	3.95184e-05	NI-NG-NI-NN-NI-HD-NS-NS-NN-NG-HD-NS-HD-NN-HD-HD-HD-NI-NG-NG	TAL20Xam668
Manes.09G061000.4.v7.0;pacid=41310752	102	+	0.312121	CTCACAAGGGTCCCACCCATG	3.95184e-05	NI-NG-NI-NN-NI-HD-NS-NS-NN-NG-HD-NS-HD-NN-HD-HD-HD-NI-NG-NG	TAL20Xam668
Manes.18G022500.1.v7.0;pacid=41333319	413	+	0.312118	TAGAGAAGGGACAGGCACATT	3.95236e-05	NI-NG-NI-NN-NI-HD-NS-NS-NN-NG-HD-NS-HD-NN-HD-HD-HD-NI-NG-NG	TAL20Xam668
Manes.18G000200.1.v7.0;pacid=41333119	436	+	0.312118	TATAAACCAATCAACCTAATC	3.95238e-05	NI-NG-NI-NN-NI-HD-NS-NS-NN-NG-HD-NS-HD-NN-HD-HD-HD-NI-NG-NG	TAL20Xam668
Manes.18G000200.2.v7.0;pacid=41333120	453	+	0.312118	TATAAACCAATCAACCTAATC	3.95238e-05	NI-NG-NI-NN-NI-HD-NS-NS-NN-NG-HD-NS-HD-NN-HD-HD-HD-NI-NG-NG	TAL20Xam668
Manes.13G044800.1.v7.0;pacid=41337760	2	+	0.312102	TATACTCGTCTCTTTCCCAAT	3.95479e-05	NI-NG-NI-NN-NI-HD-NS-NS-NN-NG-HD-NS-HD-NN-HD-HD-HD-NI-NG-NG	TAL20Xam668
Manes.13G044800.2.v7.0;pacid=41337761	2	+	0.312102	TATACTCGTCTCTTTCCCAAT	3.95479e-05	NI-NG-NI-NN-NI-HD-NS-NS-NN-NG-HD-NS-HD-NN-HD-HD-HD-NI-NG-NG	TAL20Xam668
Manes.11G096200.2.v7.0;pacid=41316593	445	+	0.312019	TATGGACTAAACACTCACTTT	3.9677e-05	NI-NG-NI-NN-NI-HD-NS-NS-NN-NG-HD-NS-HD-NN-HD-HD-HD-NI-NG-NG	TAL20Xam668
Manes.03G072400.1.v7.0;pacid=41308430	214	+	0.312004	TATAAAATAGTATCAATCAAT	3.97003e-05	NI-NG-NI-NN-NI-HD-NS-NS-NN-NG-HD-NS-HD-NN-HD-HD-HD-NI-NG-NG	TAL20Xam668
Manes.05G185500.1.v7.0;pacid=41335988	392	+	0.312002	GAGAGAATGCTCACACCCCTT	3.97037e-05	NI-NG-NI-NN-NI-HD-NS-NS-NN-NG-HD-NS-HD-NN-HD-HD-HD-NI-NG-NG	TAL20Xam668
Manes.12G067700.1.v7.0;pacid=41323838	34	+	0.311999	TATATATATGGACCACCCAAT	3.9708e-05	NI-NG-NI-NN-NI-HD-NS-NS-NN-NG-HD-NS-HD-NN-HD-HD-HD-NI-NG-NG	TAL20Xam668
Manes.08G016200.1.v7.0;pacid=41314008	47	+	0.311994	CATAAACAAGTTCATACCAAT	3.9716e-05	NI-NG-NI-NN-NI-HD-NS-NS-NN-NG-HD-NS-HD-NN-HD-HD-HD-NI-NG-NG	TAL20Xam668
Manes.08G016200.2.v7.0;pacid=41314009	150	+	0.311994	CATAAACAAGTTCATACCAAT	3.9716e-05	NI-NG-NI-NN-NI-HD-NS-NS-NN-NG-HD-NS-HD-NN-HD-HD-HD-NI-NG-NG	TAL20Xam668
Manes.06G030000.1.v7.0;pacid=41303258	21	-	0.311959	TGTCCCCTCATCCAGCCCATT	3.97697e-05	NI-NG-NI-NN-NI-HD-NS-NS-NN-NG-HD-NS-HD-NN-HD-HD-HD-NI-NG-NG	TAL20Xam668
Manes.01G065700.1.v7.0;pacid=41324627	269	+	0.311949	GATAGACGGCCAACGGCCATT	3.97861e-05	NI-NG-NI-NN-NI-HD-NS-NS-NN-NG-HD-NS-HD-NN-HD-HD-HD-NI-NG-NG	TAL20Xam668
Manes.17G046700.1.v7.0;pacid=41330610	215	-	0.311896	CAAACAACTCTCTCAACCATT	3.98676e-05	NI-NG-NI-NN-NI-HD-NS-NS-NN-NG-HD-NS-HD-NN-HD-HD-HD-NI-NG-NG	TAL20Xam668
Manes.17G099200.1.v7.0;pacid=41330662	229	-	0.311782	CATACATAAATCTCAACTATT	4.00467e-05	NI-NG-NI-NN-NI-HD-NS-NS-NN-NG-HD-NS-HD-NN-HD-HD-HD-NI-NG-NG	TAL20Xam668
Manes.10G088000.1.v7.0;pacid=41321936	177	+	0.311713	TAAAACCCCTTCTCTCCCTTT	4.01548e-05	NI-NG-NI-NN-NI-HD-NS-NS-NN-NG-HD-NS-HD-NN-HD-HD-HD-NI-NG-NG	TAL20Xam668
Manes.05G189600.1.v7.0;pacid=41336630	210	+	0.311644	TTTATACAATTCCCCCAAATT	4.02638e-05	NI-NG-NI-NN-NI-HD-NS-NS-NN-NG-HD-NS-HD-NN-HD-HD-HD-NI-NG-NG	TAL20Xam668
Manes.01G031900.1.v7.0;pacid=41324406	230	+	0.311619	GACAGACCTTTCCCTCCCAAT	4.03026e-05	NI-NG-NI-NN-NI-HD-NS-NS-NN-NG-HD-NS-HD-NN-HD-HD-HD-NI-NG-NG	TAL20Xam668
Manes.15G146600.1.v7.0;pacid=41305964	95	+	0.311502	TCTAGCCATTTCTCACACTTT	4.04877e-05	NI-NG-NI-NN-NI-HD-NS-NS-NN-NG-HD-NS-HD-NN-HD-HD-HD-NI-NG-NG	TAL20Xam668
Manes.01G113300.1.v7.0;pacid=41327370	177	-	0.311452	TATAAATAATACACCTCCATT	4.05659e-05	NI-NG-NI-NN-NI-HD-NS-NS-NN-NG-HD-NS-HD-NN-HD-HD-HD-NI-NG-NG	TAL20Xam668
Manes.12G070900.1.v7.0;pacid=41322242	220	+	0.311427	TTTCCACATTTCACCTCCATT	4.06068e-05	NI-NG-NI-NN-NI-HD-NS-NS-NN-NG-HD-NS-HD-NN-HD-HD-HD-NI-NG-NG	TAL20Xam668
Manes.12G071100.1.v7.0;pacid=41322533	467	+	0.311427	TTTCCACATTTCACCTCCATT	4.06068e-05	NI-NG-NI-NN-NI-HD-NS-NS-NN-NG-HD-NS-HD-NN-HD-HD-HD-NI-NG-NG	TAL20Xam668
Manes.12G071100.2.v7.0;pacid=41322534	467	+	0.311427	TTTCCACATTTCACCTCCATT	4.06068e-05	NI-NG-NI-NN-NI-HD-NS-NS-NN-NG-HD-NS-HD-NN-HD-HD-HD-NI-NG-NG	TAL20Xam668
Manes.05G055200.3.v7.0;pacid=41336186	183	+	0.311369	TATCCAAAGGAACCACCCAGT	4.06982e-05	NI-NG-NI-NN-NI-HD-NS-NS-NN-NG-HD-NS-HD-NN-HD-HD-HD-NI-NG-NG	TAL20Xam668
Manes.08G167100.1.v7.0;pacid=41314168	26	+	0.311356	ACAAGACAACTCGTGACCATT	4.07184e-05	NI-NG-NI-NN-NI-HD-NS-NS-NN-NG-HD-NS-HD-NN-HD-HD-HD-NI-NG-NG	TAL20Xam668
Manes.S032100.1.v7.0;pacid=41328927	197	-	0.311278	TATAAACACCTTCCTCCCAAG	4.08425e-05	NI-NG-NI-NN-NI-HD-NS-NS-NN-NG-HD-NS-HD-NN-HD-HD-HD-NI-NG-NG	TAL20Xam668
Manes.05G071400.1.v7.0;pacid=41336911	87	-	0.311226	TATAAACTGGTGCCTCTAATT	4.09259e-05	NI-NG-NI-NN-NI-HD-NS-NS-NN-NG-HD-NS-HD-NN-HD-HD-HD-NI-NG-NG	TAL20Xam668
Manes.13G018600.1.v7.0;pacid=41338480	4	+	0.311191	AATTCACGGATCTCGCCGAAT	4.09827e-05	NI-NG-NI-NN-NI-HD-NS-NS-NN-NG-HD-NS-HD-NN-HD-HD-HD-NI-NG-NG	TAL20Xam668
Manes.04G035200.1.v7.0;pacid=41315410	62	-	0.311129	TTTGAACCAAACCCGCCAATT	4.10812e-05	NI-NG-NI-NN-NI-HD-NS-NS-NN-NG-HD-NS-HD-NN-HD-HD-HD-NI-NG-NG	TAL20Xam668
Manes.15G032100.1.v7.0;pacid=41305301	104	+	0.31111	TACTAGCAAGTTCAGCCCATT	4.11117e-05	NI-NG-NI-NN-NI-HD-NS-NS-NN-NG-HD-NS-HD-NN-HD-HD-HD-NI-NG-NG	TAL20Xam668
Manes.06G144900.1.v7.0;pacid=41304726	86	+	0.311099	TATTGTTTAGTCTAGCCCTTT	4.11301e-05	NI-NG-NI-NN-NI-HD-NS-NS-NN-NG-HD-NS-HD-NN-HD-HD-HD-NI-NG-NG	TAL20Xam668
Manes.01G098300.1.v7.0;pacid=41324246	42	+	0.311093	TGCAGAAGCGTCTCACCCTAT	4.11397e-05	NI-NG-NI-NN-NI-HD-NS-NS-NN-NG-HD-NS-HD-NN-HD-HD-HD-NI-NG-NG	TAL20Xam668
Manes.18G072900.1.v7.0;pacid=41334379	86	-	0.311086	CTTACTCAAGTCGCAACCAAT	4.11514e-05	NI-NG-NI-NN-NI-HD-NS-NS-NN-NG-HD-NS-HD-NN-HD-HD-HD-NI-NG-NG	TAL20Xam668
Manes.14G102900.1.v7.0;pacid=41332428	29	-	0.311043	TAGAGAGATTTCTCGCCCTTT	4.12196e-05	NI-NG-NI-NN-NI-HD-NS-NS-NN-NG-HD-NS-HD-NN-HD-HD-HD-NI-NG-NG	TAL20Xam668
Manes.14G102900.2.v7.0;pacid=41332429	29	-	0.311043	TAGAGAGATTTCTCGCCCTTT	4.12196e-05	NI-NG-NI-NN-NI-HD-NS-NS-NN-NG-HD-NS-HD-NN-HD-HD-HD-NI-NG-NG	TAL20Xam668
Manes.05G144700.1.v7.0;pacid=41334838	49	-	0.311034	TATAGCCATTTTATGCCAATT	4.12338e-05	NI-NG-NI-NN-NI-HD-NS-NS-NN-NG-HD-NS-HD-NN-HD-HD-HD-NI-NG-NG	TAL20Xam668
Manes.14G052300.1.v7.0;pacid=41331750	1	+	0.311034	TATAGAAAATACCCGAACAGT	4.12341e-05	NI-NG-NI-NN-NI-HD-NS-NS-NN-NG-HD-NS-HD-NN-HD-HD-HD-NI-NG-NG	TAL20Xam668
Manes.11G022400.1.v7.0;pacid=41317982	398	+	0.311003	TAAAAACCCTTCACAACCAAA	4.12843e-05	NI-NG-NI-NN-NI-HD-NS-NS-NN-NG-HD-NS-HD-NN-HD-HD-HD-NI-NG-NG	TAL20Xam668
Manes.11G087000.1.v7.0;pacid=41317643	214	+	0.311	CATTGACAACTAACCACCAGT	4.12888e-05	NI-NG-NI-NN-NI-HD-NS-NS-NN-NG-HD-NS-HD-NN-HD-HD-HD-NI-NG-NG	TAL20Xam668
Manes.02G133800.1.v7.0;pacid=41340146	44	-	0.310937	TATTGTCTATTATCACCAATT	4.13915e-05	NI-NG-NI-NN-NI-HD-NS-NS-NN-NG-HD-NS-HD-NN-HD-HD-HD-NI-NG-NG	TAL20Xam668
Manes.03G106600.1.v7.0;pacid=41308168	211	-	0.310813	TACACACCAATCCAACCCAAA	4.15911e-05	NI-NG-NI-NN-NI-HD-NS-NS-NN-NG-HD-NS-HD-NN-HD-HD-HD-NI-NG-NG	TAL20Xam668
Manes.15G136000.1.v7.0;pacid=41305930	142	+	0.310803	CACAAAAATGTACCCCCCCTT	4.16075e-05	NI-NG-NI-NN-NI-HD-NS-NS-NN-NG-HD-NS-HD-NN-HD-HD-HD-NI-NG-NG	TAL20Xam668
Manes.18G125000.1.v7.0;pacid=41334289	252	+	0.310801	TATTAAAACCCCGCTCCCATA	4.16106e-05	NI-NG-NI-NN-NI-HD-NS-NS-NN-NG-HD-NS-HD-NN-HD-HD-HD-NI-NG-NG	TAL20Xam668
Manes.08G076000.1.v7.0;pacid=41313800	28	-	0.310782	TAGACCCCCGTTACGCCTATT	4.16417e-05	NI-NG-NI-NN-NI-HD-NS-NS-NN-NG-HD-NS-HD-NN-HD-HD-HD-NI-NG-NG	TAL20Xam668
Manes.05G116500.1.v7.0;pacid=41335572	263	+	0.310781	TTAAAACCCTTACCAACCATT	4.1644e-05	NI-NG-NI-NN-NI-HD-NS-NS-NN-NG-HD-NS-HD-NN-HD-HD-HD-NI-NG-NG	TAL20Xam668
Manes.12G001800.1.v7.0;pacid=41323617	203	+	0.310777	TATAAACTCATCCAACTAAAT	4.16502e-05	NI-NG-NI-NN-NI-HD-NS-NS-NN-NG-HD-NS-HD-NN-HD-HD-HD-NI-NG-NG	TAL20Xam668
Manes.13G019700.1.v7.0;pacid=41338969	102	+	0.31076	TTTAGCTCATTCTCGTCCATT	4.16777e-05	NI-NG-NI-NN-NI-HD-NS-NS-NN-NG-HD-NS-HD-NN-HD-HD-HD-NI-NG-NG	TAL20Xam668
Manes.11G095500.1.v7.0;pacid=41317950	130	-	0.310715	TATATTTGCGACACGCCCGTT	4.17518e-05	NI-NG-NI-NN-NI-HD-NS-NS-NN-NG-HD-NS-HD-NN-HD-HD-HD-NI-NG-NG	TAL20Xam668
Manes.11G095500.2.v7.0;pacid=41317951	130	-	0.310715	TATATTTGCGACACGCCCGTT	4.17518e-05	NI-NG-NI-NN-NI-HD-NS-NS-NN-NG-HD-NS-HD-NN-HD-HD-HD-NI-NG-NG	TAL20Xam668
Manes.11G095500.3.v7.0;pacid=41317952	130	-	0.310715	TATATTTGCGACACGCCCGTT	4.17518e-05	NI-NG-NI-NN-NI-HD-NS-NS-NN-NG-HD-NS-HD-NN-HD-HD-HD-NI-NG-NG	TAL20Xam668
Manes.05G126900.1.v7.0;pacid=41336339	207	-	0.310692	TATAGACCGTTCATGCTCAAG	4.17885e-05	NI-NG-NI-NN-NI-HD-NS-NS-NN-NG-HD-NS-HD-NN-HD-HD-HD-NI-NG-NG	TAL20Xam668
Manes.10G113500.1.v7.0;pacid=41321035	162	+	0.310656	TATAAAATAGTCCTCCACTTT	4.18473e-05	NI-NG-NI-NN-NI-HD-NS-NS-NN-NG-HD-NS-HD-NN-HD-HD-HD-NI-NG-NG	TAL20Xam668
Manes.14G048000.3.v7.0;pacid=41331224	303	+	0.310651	CACCAACAAAGCACGCCCATA	4.18549e-05	NI-NG-NI-NN-NI-HD-NS-NS-NN-NG-HD-NS-HD-NN-HD-HD-HD-NI-NG-NG	TAL20Xam668
Manes.18G140000.1.v7.0;pacid=41334196	98	+	0.310633	CATACAACGGTACCCACCTTT	4.18845e-05	NI-NG-NI-NN-NI-HD-NS-NS-NN-NG-HD-NS-HD-NN-HD-HD-HD-NI-NG-NG	TAL20Xam668
Manes.12G111700.1.v7.0;pacid=41323524	136	+	0.310632	ATTATACGAATAAATCCCATT	4.18869e-05	NI-NG-NI-NN-NI-HD-NS-NS-NN-NG-HD-NS-HD-NN-HD-HD-HD-NI-NG-NG	TAL20Xam668
Manes.02G129000.1.v7.0;pacid=41339794	138	+	0.310608	TATATTAAAGTCTAAAACATT	4.19264e-05	NI-NG-NI-NN-NI-HD-NS-NS-NN-NG-HD-NS-HD-NN-HD-HD-HD-NI-NG-NG	TAL20Xam668
Manes.17G012600.1.v7.0;pacid=41329498	37	-	0.310401	TACTGACGAATCACAACAATC	4.22651e-05	NI-NG-NI-NN-NI-HD-NS-NS-NN-NG-HD-NS-HD-NN-HD-HD-HD-NI-NG-NG	TAL20Xam668
Manes.10G120100.1.v7.0;pacid=41320429	99	+	0.310344	TAAAGAAGCCTCACGCACTTC	4.23593e-05	NI-NG-NI-NN-NI-HD-NS-NS-NN-NG-HD-NS-HD-NN-HD-HD-HD-NI-NG-NG	TAL20Xam668
Manes.15G012000.1.v7.0;pacid=41305561	112	+	0.310297	TATATCAAAATCACCCCACTT	4.24374e-05	NI-NG-NI-NN-NI-HD-NS-NS-NN-NG-HD-NS-HD-NN-HD-HD-HD-NI-NG-NG	TAL20Xam668
Manes.06G112000.1.v7.0;pacid=41304040	204	+	0.310236	TCCAGAAAAAAAAAGCCCATT	4.25385e-05	NI-NG-NI-NN-NI-HD-NS-NS-NN-NG-HD-NS-HD-NN-HD-HD-HD-NI-NG-NG	TAL20Xam668
Manes.15G102900.1.v7.0;pacid=41306707	73	-	0.310233	TATAAAAAAATCATTACCAGT	4.25429e-05	NI-NG-NI-NN-NI-HD-NS-NS-NN-NG-HD-NS-HD-NN-HD-HD-HD-NI-NG-NG	TAL20Xam668
Manes.14G013200.1.v7.0;pacid=41332279	167	+	0.310212	CGTTGTCAAATCTCGCCCATG	4.25787e-05	NI-NG-NI-NN-NI-HD-NS-NS-NN-NG-HD-NS-HD-NN-HD-HD-HD-NI-NG-NG	TAL20Xam668
Manes.01G085200.1.v7.0;pacid=41327051	186	+	0.310185	TATAGCCTTATCACTCCATCT	4.26231e-05	NI-NG-NI-NN-NI-HD-NS-NS-NN-NG-HD-NS-HD-NN-HD-HD-HD-NI-NG-NG	TAL20Xam668
Manes.09G113400.1.v7.0;pacid=41310489	43	+	0.310182	CATGTGCGAGGCTCTCCCATT	4.26274e-05	NI-NG-NI-NN-NI-HD-NS-NS-NN-NG-HD-NS-HD-NN-HD-HD-HD-NI-NG-NG	TAL20Xam668
Manes.10G028100.1.v7.0;pacid=41320863	183	+	0.310168	TAAACACAATGCAAACCCACT	4.26519e-05	NI-NG-NI-NN-NI-HD-NS-NS-NN-NG-HD-NS-HD-NN-HD-HD-HD-NI-NG-NG	TAL20Xam668
Manes.02G128500.1.v7.0;pacid=41341500	59	+	0.310152	TCTAGAAAAGTAAAATCCATA	4.26775e-05	NI-NG-NI-NN-NI-HD-NS-NS-NN-NG-HD-NS-HD-NN-HD-HD-HD-NI-NG-NG	TAL20Xam668
Manes.12G032600.1.v7.0;pacid=41322241	93	+	0.310152	TATAGATATATAAAACCACTT	4.26786e-05	NI-NG-NI-NN-NI-HD-NS-NS-NN-NG-HD-NS-HD-NN-HD-HD-HD-NI-NG-NG	TAL20Xam668
Manes.06G127900.1.v7.0;pacid=41303875	137	+	0.310137	TAAAAACGCATCACCCACACC	4.27033e-05	NI-NG-NI-NN-NI-HD-NS-NS-NN-NG-HD-NS-HD-NN-HD-HD-HD-NI-NG-NG	TAL20Xam668
Manes.S061400.1.v7.0;pacid=41322985	221	+	0.310114	TATATACACTTCACTCCATTA	4.27416e-05	NI-NG-NI-NN-NI-HD-NS-NS-NN-NG-HD-NS-HD-NN-HD-HD-HD-NI-NG-NG	TAL20Xam668
Manes.14G034100.1.v7.0;pacid=41330966	116	+	0.310042	TATAAACGCGTTCCTCTCCTC	4.28621e-05	NI-NG-NI-NN-NI-HD-NS-NS-NN-NG-HD-NS-HD-NN-HD-HD-HD-NI-NG-NG	TAL20Xam668
Manes.10G121600.1.v7.0;pacid=41320655	42	+	0.310039	TATAGAATTGTATATCAAATT	4.28659e-05	NI-NG-NI-NN-NI-HD-NS-NS-NN-NG-HD-NS-HD-NN-HD-HD-HD-NI-NG-NG	TAL20Xam668
Manes.06G058300.1.v7.0;pacid=41303296	428	-	0.309991	TCTAAACTCATCACAATCAAT	4.29473e-05	NI-NG-NI-NN-NI-HD-NS-NS-NN-NG-HD-NS-HD-NN-HD-HD-HD-NI-NG-NG	TAL20Xam668
Manes.05G101500.1.v7.0;pacid=41335777	203	+	0.309939	TCTTGAATGTTCAAGCCTATT	4.30339e-05	NI-NG-NI-NN-NI-HD-NS-NS-NN-NG-HD-NS-HD-NN-HD-HD-HD-NI-NG-NG	TAL20Xam668
Manes.06G068500.1.v7.0;pacid=41302731	220	+	0.309934	TATATACGCCTCTCCCCGCCT	4.30417e-05	NI-NG-NI-NN-NI-HD-NS-NS-NN-NG-HD-NS-HD-NN-HD-HD-HD-NI-NG-NG	TAL20Xam668
Manes.06G102600.1.v7.0;pacid=41303901	209	+	0.309903	TATTAATTTATCAAACCCAAT	4.30936e-05	NI-NG-NI-NN-NI-HD-NS-NS-NN-NG-HD-NS-HD-NN-HD-HD-HD-NI-NG-NG	TAL20Xam668
Manes.05G117800.1.v7.0;pacid=41335322	181	-	0.30985	TACAAACCAGATCCATCCATT	4.31829e-05	NI-NG-NI-NN-NI-HD-NS-NS-NN-NG-HD-NS-HD-NN-HD-HD-HD-NI-NG-NG	TAL20Xam668
Manes.09G017700.1.v7.0;pacid=41312095	118	+	0.309848	TTTAGCCAAATCAAACCCTAT	4.31867e-05	NI-NG-NI-NN-NI-HD-NS-NS-NN-NG-HD-NS-HD-NN-HD-HD-HD-NI-NG-NG	TAL20Xam668
Manes.13G064100.1.v7.0;pacid=41337259	213	+	0.309834	TATAAACTCCTTTAAACCCTT	4.32101e-05	NI-NG-NI-NN-NI-HD-NS-NS-NN-NG-HD-NS-HD-NN-HD-HD-HD-NI-NG-NG	TAL20Xam668
Manes.05G112100.1.v7.0;pacid=41334778	302	+	0.309743	TATAAACCCCTTTCTCTCATA	4.33632e-05	NI-NG-NI-NN-NI-HD-NS-NS-NN-NG-HD-NS-HD-NN-HD-HD-HD-NI-NG-NG	TAL20Xam668
Manes.11G049900.1.v7.0;pacid=41318599	167	-	0.3097	TATTGACCGAGAGCAACCATC	4.34365e-05	NI-NG-NI-NN-NI-HD-NS-NS-NN-NG-HD-NS-HD-NN-HD-HD-HD-NI-NG-NG	TAL20Xam668
Manes.14G158000.1.v7.0;pacid=41331835	14	+	0.309678	TTTAGAAGTGTCAATTACATT	4.3474e-05	NI-NG-NI-NN-NI-HD-NS-NS-NN-NG-HD-NS-HD-NN-HD-HD-HD-NI-NG-NG	TAL20Xam668
Manes.16G094600.1.v7.0;pacid=41320167	139	+	0.309662	TCTACGCATCGCGCGCACATT	4.34996e-05	NI-NG-NI-NN-NI-HD-NS-NS-NN-NG-HD-NS-HD-NN-HD-HD-HD-NI-NG-NG	TAL20Xam668
Manes.06G168300.1.v7.0;pacid=41303114	473	+	0.309634	TATAAATCAAATCCAACCATT	4.35476e-05	NI-NG-NI-NN-NI-HD-NS-NS-NN-NG-HD-NS-HD-NN-HD-HD-HD-NI-NG-NG	TAL20Xam668
Manes.05G167100.1.v7.0;pacid=41321042	12	-	0.309632	CATAAAATTATTACCACCATT	4.35517e-05	NI-NG-NI-NN-NI-HD-NS-NS-NN-NG-HD-NS-HD-NN-HD-HD-HD-NI-NG-NG	TAL20Xam668
Manes.02G159900.1.v7.0;pacid=41339571	150	-	0.30958	TATGGACCCATCGCATGCATC	4.36396e-05	NI-NG-NI-NN-NI-HD-NS-NS-NN-NG-HD-NS-HD-NN-HD-HD-HD-NI-NG-NG	TAL20Xam668
Manes.08G046900.1.v7.0;pacid=41312695	226	-	0.309532	TATAGACTAGGCCTGAACACT	4.37218e-05	NI-NG-NI-NN-NI-HD-NS-NS-NN-NG-HD-NS-HD-NN-HD-HD-HD-NI-NG-NG	TAL20Xam668
Manes.03G147700.1.v7.0;pacid=41307689	82	-	0.309481	TATTAAAACATCCCTAACATT	4.3808e-05	NI-NG-NI-NN-NI-HD-NS-NS-NN-NG-HD-NS-HD-NN-HD-HD-HD-NI-NG-NG	TAL20Xam668
Manes.01G270400.1.v7.0;pacid=41326062	291	+	0.309454	TATTCATCCCTTGCTCCCATT	4.38542e-05	NI-NG-NI-NN-NI-HD-NS-NS-NN-NG-HD-NS-HD-NN-HD-HD-HD-NI-NG-NG	TAL20Xam668
Manes.01G270400.2.v7.0;pacid=41326063	299	+	0.309454	TATTCATCCCTTGCTCCCATT	4.38542e-05	NI-NG-NI-NN-NI-HD-NS-NS-NN-NG-HD-NS-HD-NN-HD-HD-HD-NI-NG-NG	TAL20Xam668
Manes.01G270400.3.v7.0;pacid=41326064	299	+	0.309454	TATTCATCCCTTGCTCCCATT	4.38542e-05	NI-NG-NI-NN-NI-HD-NS-NS-NN-NG-HD-NS-HD-NN-HD-HD-HD-NI-NG-NG	TAL20Xam668
Manes.01G270400.4.v7.0;pacid=41326065	291	+	0.309454	TATTCATCCCTTGCTCCCATT	4.38542e-05	NI-NG-NI-NN-NI-HD-NS-NS-NN-NG-HD-NS-HD-NN-HD-HD-HD-NI-NG-NG	TAL20Xam668
Manes.02G070200.1.v7.0;pacid=41341539	96	-	0.309436	TGTACCCTAGTCACACCCGAT	4.38846e-05	NI-NG-NI-NN-NI-HD-NS-NS-NN-NG-HD-NS-HD-NN-HD-HD-HD-NI-NG-NG	TAL20Xam668
Manes.13G136100.1.v7.0;pacid=41338836	131	+	0.309385	TTTTTACAATTCGCTCGCATT	4.39716e-05	NI-NG-NI-NN-NI-HD-NS-NS-NN-NG-HD-NS-HD-NN-HD-HD-HD-NI-NG-NG	TAL20Xam668
Manes.17G067500.1.v7.0;pacid=41330260	64	+	0.309372	TATATACCGGTAGTCTCCATC	4.39947e-05	NI-NG-NI-NN-NI-HD-NS-NS-NN-NG-HD-NS-HD-NN-HD-HD-HD-NI-NG-NG	TAL20Xam668
Manes.07G120200.1.v7.0;pacid=41328523	241	+	0.309366	CATAAAAGCATCAAACCCGAT	4.40039e-05	NI-NG-NI-NN-NI-HD-NS-NS-NN-NG-HD-NS-HD-NN-HD-HD-HD-NI-NG-NG	TAL20Xam668
Manes.09G055000.1.v7.0;pacid=41312088	43	-	0.309359	CATCGAGTGGTCATCCCCATT	4.40171e-05	NI-NG-NI-NN-NI-HD-NS-NS-NN-NG-HD-NS-HD-NN-HD-HD-HD-NI-NG-NG	TAL20Xam668
Manes.03G080900.1.v7.0;pacid=41307502	144	+	0.309348	CATTCACCAATCCCCACCTTT	4.40345e-05	NI-NG-NI-NN-NI-HD-NS-NS-NN-NG-HD-NS-HD-NN-HD-HD-HD-NI-NG-NG	TAL20Xam668
Manes.09G151200.1.v7.0;pacid=41310702	278	-	0.309348	TAAAAACTTAACGAACCAATT	4.40357e-05	NI-NG-NI-NN-NI-HD-NS-NS-NN-NG-HD-NS-HD-NN-HD-HD-HD-NI-NG-NG	TAL20Xam668
Manes.07G049700.1.v7.0;pacid=41329158	433	+	0.309334	CAAAGCAATCTCACACCCATG	4.40599e-05	NI-NG-NI-NN-NI-HD-NS-NS-NN-NG-HD-NS-HD-NN-HD-HD-HD-NI-NG-NG	TAL20Xam668
Manes.07G049700.2.v7.0;pacid=41329159	433	+	0.309334	CAAAGCAATCTCACACCCATG	4.40599e-05	NI-NG-NI-NN-NI-HD-NS-NS-NN-NG-HD-NS-HD-NN-HD-HD-HD-NI-NG-NG	TAL20Xam668
Manes.12G016100.1.v7.0;pacid=41324085	274	+	0.309304	TATTTACCCCTCTCTCCCACA	4.41107e-05	NI-NG-NI-NN-NI-HD-NS-NS-NN-NG-HD-NS-HD-NN-HD-HD-HD-NI-NG-NG	TAL20Xam668
Manes.08G008700.1.v7.0;pacid=41313869	276	-	0.309303	TATATACGTGTATCACACAGA	4.41126e-05	NI-NG-NI-NN-NI-HD-NS-NS-NN-NG-HD-NS-HD-NN-HD-HD-HD-NI-NG-NG	TAL20Xam668
Manes.04G016600.1.v7.0;pacid=41315731	117	-	0.309244	TATAAATTTGTCGCAATCTTT	4.42139e-05	NI-NG-NI-NN-NI-HD-NS-NS-NN-NG-HD-NS-HD-NN-HD-HD-HD-NI-NG-NG	TAL20Xam668
Manes.14G102600.1.v7.0;pacid=41331587	148	-	0.30924	TATAGAGCAATCACTCGCTTT	4.42214e-05	NI-NG-NI-NN-NI-HD-NS-NS-NN-NG-HD-NS-HD-NN-HD-HD-HD-NI-NG-NG	TAL20Xam668
Manes.13G073900.1.v7.0;pacid=41338046	128	-	0.30921	TATAAAAGGTTACCTACTATT	4.42719e-05	NI-NG-NI-NN-NI-HD-NS-NS-NN-NG-HD-NS-HD-NN-HD-HD-HD-NI-NG-NG	TAL20Xam668
Manes.S036100.1.v7.0;pacid=41317345	193	+	0.309195	TATATACAGTAATAACCAATT	4.42981e-05	NI-NG-NI-NN-NI-HD-NS-NS-NN-NG-HD-NS-HD-NN-HD-HD-HD-NI-NG-NG	TAL20Xam668
Manes.06G095800.6.v7.0;pacid=41303290	319	-	0.309177	AATAAACGAGTCTAGCCACTC	4.43292e-05	NI-NG-NI-NN-NI-HD-NS-NS-NN-NG-HD-NS-HD-NN-HD-HD-HD-NI-NG-NG	TAL20Xam668
Manes.15G028800.1.v7.0;pacid=41306621	208	-	0.309175	TATCACAAGGTTGCACCCACT	4.43324e-05	NI-NG-NI-NN-NI-HD-NS-NS-NN-NG-HD-NS-HD-NN-HD-HD-HD-NI-NG-NG	TAL20Xam668
Manes.15G028800.2.v7.0;pacid=41306622	298	-	0.309175	TATCACAAGGTTGCACCCACT	4.43324e-05	NI-NG-NI-NN-NI-HD-NS-NS-NN-NG-HD-NS-HD-NN-HD-HD-HD-NI-NG-NG	TAL20Xam668
Manes.09G087000.1.v7.0;pacid=41310585	162	+	0.309167	CAGATTCATGTAACGCCCATA	4.43463e-05	NI-NG-NI-NN-NI-HD-NS-NS-NN-NG-HD-NS-HD-NN-HD-HD-HD-NI-NG-NG	TAL20Xam668
Manes.05G019700.1.v7.0;pacid=41335346	157	+	0.309082	TATATATTTTTCCATACCATT	4.44927e-05	NI-NG-NI-NN-NI-HD-NS-NS-NN-NG-HD-NS-HD-NN-HD-HD-HD-NI-NG-NG	TAL20Xam668
Manes.01G111800.1.v7.0;pacid=41326913	140	+	0.309076	TACACTCGCTTCTCTCTCATT	4.45032e-05	NI-NG-NI-NN-NI-HD-NS-NS-NN-NG-HD-NS-HD-NN-HD-HD-HD-NI-NG-NG	TAL20Xam668
Manes.03G001500.1.v7.0;pacid=41308407	240	+	0.309067	CATACACCTCTCCAACACTTT	4.45194e-05	NI-NG-NI-NN-NI-HD-NS-NS-NN-NG-HD-NS-HD-NN-HD-HD-HD-NI-NG-NG	TAL20Xam668
Manes.11G105900.1.v7.0;pacid=41317546	94	-	0.309047	TATAGATGGTTTACACCAAAT	4.45536e-05	NI-NG-NI-NN-NI-HD-NS-NS-NN-NG-HD-NS-HD-NN-HD-HD-HD-NI-NG-NG	TAL20Xam668
Manes.11G105900.2.v7.0;pacid=41317547	97	-	0.309047	TATAGATGGTTTACACCAAAT	4.45536e-05	NI-NG-NI-NN-NI-HD-NS-NS-NN-NG-HD-NS-HD-NN-HD-HD-HD-NI-NG-NG	TAL20Xam668
Manes.11G105900.3.v7.0;pacid=41317548	94	-	0.309047	TATAGATGGTTTACACCAAAT	4.45536e-05	NI-NG-NI-NN-NI-HD-NS-NS-NN-NG-HD-NS-HD-NN-HD-HD-HD-NI-NG-NG	TAL20Xam668
Manes.11G105900.4.v7.0;pacid=41317552	84	-	0.309047	TATAGATGGTTTACACCAAAT	4.45536e-05	NI-NG-NI-NN-NI-HD-NS-NS-NN-NG-HD-NS-HD-NN-HD-HD-HD-NI-NG-NG	TAL20Xam668
Manes.02G021800.1.v7.0;pacid=41340084	60	-	0.30902	TATAAACTTAGTACCCACATT	4.45999e-05	NI-NG-NI-NN-NI-HD-NS-NS-NN-NG-HD-NS-HD-NN-HD-HD-HD-NI-NG-NG	TAL20Xam668
Manes.16G019800.1.v7.0;pacid=41319016	135	+	0.309001	AATGGACACGTGGCTCCCACT	4.46333e-05	NI-NG-NI-NN-NI-HD-NS-NS-NN-NG-HD-NS-HD-NN-HD-HD-HD-NI-NG-NG	TAL20Xam668
Manes.02G021000.1.v7.0;pacid=41340595	163	+	0.308992	TATCTGTGGGTCTCATCCATT	4.46485e-05	NI-NG-NI-NN-NI-HD-NS-NS-NN-NG-HD-NS-HD-NN-HD-HD-HD-NI-NG-NG	TAL20Xam668
Manes.06G064200.1.v7.0;pacid=41303312	72	+	0.308964	TATAGAGTAATCAAATCCAAT	4.46978e-05	NI-NG-NI-NN-NI-HD-NS-NS-NN-NG-HD-NS-HD-NN-HD-HD-HD-NI-NG-NG	TAL20Xam668
Manes.11G011100.1.v7.0;pacid=41318214	204	+	0.308938	TATATATATATCAAAATCATT	4.47438e-05	NI-NG-NI-NN-NI-HD-NS-NS-NN-NG-HD-NS-HD-NN-HD-HD-HD-NI-NG-NG	TAL20Xam668
Manes.05G109300.1.v7.0;pacid=41336994	360	+	0.308928	CATTACCAATTCGCTCCCATG	4.47606e-05	NI-NG-NI-NN-NI-HD-NS-NS-NN-NG-HD-NS-HD-NN-HD-HD-HD-NI-NG-NG	TAL20Xam668
Manes.11G069200.1.v7.0;pacid=41317125	87	-	0.308895	TTTAAAACCATCACCACCATC	4.48181e-05	NI-NG-NI-NN-NI-HD-NS-NS-NN-NG-HD-NS-HD-NN-HD-HD-HD-NI-NG-NG	TAL20Xam668
Manes.01G255400.1.v7.0;pacid=41324803	127	+	0.308882	CATAAAAAAGTTGATCCGATT	4.48409e-05	NI-NG-NI-NN-NI-HD-NS-NS-NN-NG-HD-NS-HD-NN-HD-HD-HD-NI-NG-NG	TAL20Xam668
Manes.02G162900.1.v7.0;pacid=41340556	330	+	0.308847	TATATATATATACCAACAATT	4.49023e-05	NI-NG-NI-NN-NI-HD-NS-NS-NN-NG-HD-NS-HD-NN-HD-HD-HD-NI-NG-NG	TAL20Xam668
Manes.12G047900.1.v7.0;pacid=41323638	311	+	0.308831	TATAAAACCACCAAAACCCTT	4.49289e-05	NI-NG-NI-NN-NI-HD-NS-NS-NN-NG-HD-NS-HD-NN-HD-HD-HD-NI-NG-NG	TAL20Xam668
Manes.12G047900.2.v7.0;pacid=41323639	278	+	0.308831	TATAAAACCACCAAAACCCTT	4.49289e-05	NI-NG-NI-NN-NI-HD-NS-NS-NN-NG-HD-NS-HD-NN-HD-HD-HD-NI-NG-NG	TAL20Xam668
Manes.04G162600.1.v7.0;pacid=41316445	268	-	0.308811	CATCCATGGCTCAACCCCATT	4.49654e-05	NI-NG-NI-NN-NI-HD-NS-NS-NN-NG-HD-NS-HD-NN-HD-HD-HD-NI-NG-NG	TAL20Xam668
Manes.15G033900.1.v7.0;pacid=41306435	184	-	0.308802	AATAAACAAGTCAATCGCGTT	4.49796e-05	NI-NG-NI-NN-NI-HD-NS-NS-NN-NG-HD-NS-HD-NN-HD-HD-HD-NI-NG-NG	TAL20Xam668
Manes.18G144800.1.v7.0;pacid=41333607	66	+	0.308787	TATACATGGTCCTCTTCCATT	4.50072e-05	NI-NG-NI-NN-NI-HD-NS-NS-NN-NG-HD-NS-HD-NN-HD-HD-HD-NI-NG-NG	TAL20Xam668
Manes.11G091600.1.v7.0;pacid=41317199	30	+	0.308745	TGTAAACATTTCCTTCCAATT	4.50792e-05	NI-NG-NI-NN-NI-HD-NS-NS-NN-NG-HD-NS-HD-NN-HD-HD-HD-NI-NG-NG	TAL20Xam668
Manes.04G144500.1.v7.0;pacid=41314628	21	-	0.308703	TATATACCCATCACTCGCACA	4.51537e-05	NI-NG-NI-NN-NI-HD-NS-NS-NN-NG-HD-NS-HD-NN-HD-HD-HD-NI-NG-NG	TAL20Xam668
Manes.07G041300.1.v7.0;pacid=41327683	461	+	0.308632	TTCATACCCTTTCCACCCATT	4.52791e-05	NI-NG-NI-NN-NI-HD-NS-NS-NN-NG-HD-NS-HD-NN-HD-HD-HD-NI-NG-NG	TAL20Xam668
Manes.03G159000.1.v7.0;pacid=41309447	174	+	0.308605	TATAGAATTTTCACATTCATA	4.53254e-05	NI-NG-NI-NN-NI-HD-NS-NS-NN-NG-HD-NS-HD-NN-HD-HD-HD-NI-NG-NG	TAL20Xam668
Manes.14G072700.1.v7.0;pacid=41331086	19	+	0.308601	CATAGACCAGCCAAAAACAGT	4.53338e-05	NI-NG-NI-NN-NI-HD-NS-NS-NN-NG-HD-NS-HD-NN-HD-HD-HD-NI-NG-NG	TAL20Xam668
Manes.14G108200.1.v7.0;pacid=41331120	62	+	0.308595	CATAGAAGAAGCACCCAAATT	4.53433e-05	NI-NG-NI-NN-NI-HD-NS-NS-NN-NG-HD-NS-HD-NN-HD-HD-HD-NI-NG-NG	TAL20Xam668
Manes.17G017500.1.v7.0;pacid=41330392	56	+	0.308544	TATATATAACTCCCTCACTTT	4.54343e-05	NI-NG-NI-NN-NI-HD-NS-NS-NN-NG-HD-NS-HD-NN-HD-HD-HD-NI-NG-NG	TAL20Xam668
Manes.07G005300.1.v7.0;pacid=41327720	274	+	0.308543	TATAGGCTAGACACATCCACC	4.54349e-05	NI-NG-NI-NN-NI-HD-NS-NS-NN-NG-HD-NS-HD-NN-HD-HD-HD-NI-NG-NG	TAL20Xam668
Manes.03G042700.1.v7.0;pacid=41307402	180	-	0.308453	TTTAAAAATAGCACACCAATT	4.55945e-05	NI-NG-NI-NN-NI-HD-NS-NS-NN-NG-HD-NS-HD-NN-HD-HD-HD-NI-NG-NG	TAL20Xam668
Manes.18G072900.1.v7.0;pacid=41334379	229	-	0.308431	TATATACTTCTCTCGCCTTCT	4.56329e-05	NI-NG-NI-NN-NI-HD-NS-NS-NN-NG-HD-NS-HD-NN-HD-HD-HD-NI-NG-NG	TAL20Xam668
Manes.01G021400.1.v7.0;pacid=41325176	86	-	0.308419	TCTAGACTCGACCCGAGCAAT	4.56552e-05	NI-NG-NI-NN-NI-HD-NS-NS-NN-NG-HD-NS-HD-NN-HD-HD-HD-NI-NG-NG	TAL20Xam668
Manes.13G045500.1.v7.0;pacid=41338102	225	+	0.308384	CTGTGACCGCTCGAACCCATT	4.57163e-05	NI-NG-NI-NN-NI-HD-NS-NS-NN-NG-HD-NS-HD-NN-HD-HD-HD-NI-NG-NG	TAL20Xam668
Manes.04G021600.1.v7.0;pacid=41316155	318	+	0.308377	TCAACAACCGTCCCTTCCATT	4.57284e-05	NI-NG-NI-NN-NI-HD-NS-NS-NN-NG-HD-NS-HD-NN-HD-HD-HD-NI-NG-NG	TAL20Xam668
Manes.14G156000.1.v7.0;pacid=41332510	96	+	0.308357	TATATATATGAACAGACCATT	4.57646e-05	NI-NG-NI-NN-NI-HD-NS-NS-NN-NG-HD-NS-HD-NN-HD-HD-HD-NI-NG-NG	TAL20Xam668
Manes.14G023800.1.v7.0;pacid=41332895	52	+	0.308341	TATAAAAAAAACACAACACTT	4.57937e-05	NI-NG-NI-NN-NI-HD-NS-NS-NN-NG-HD-NS-HD-NN-HD-HD-HD-NI-NG-NG	TAL20Xam668
Manes.01G023600.1.v7.0;pacid=41324184	184	-	0.308337	TATTAAAAATTTCCAACCATT	4.58004e-05	NI-NG-NI-NN-NI-HD-NS-NS-NN-NG-HD-NS-HD-NN-HD-HD-HD-NI-NG-NG	TAL20Xam668
Manes.18G041600.1.v7.0;pacid=41334342	110	+	0.308326	TAAAAACACATCACATTCCTT	4.58198e-05	NI-NG-NI-NN-NI-HD-NS-NS-NN-NG-HD-NS-HD-NN-HD-HD-HD-NI-NG-NG	TAL20Xam668
Manes.13G025700.1.v7.0;pacid=41337986	236	-	0.308271	CATAGTAATGTCGCTCTCAAT	4.59178e-05	NI-NG-NI-NN-NI-HD-NS-NS-NN-NG-HD-NS-HD-NN-HD-HD-HD-NI-NG-NG	TAL20Xam668
Manes.03G081700.1.v7.0;pacid=41309510	273	+	0.308201	TATCGACTTGGAACCACCATC	4.6043e-05	NI-NG-NI-NN-NI-HD-NS-NS-NN-NG-HD-NS-HD-NN-HD-HD-HD-NI-NG-NG	TAL20Xam668
Manes.05G164700.1.v7.0;pacid=41336215	144	+	0.308183	TATAATCTGACCACCACCTTT	4.6074e-05	NI-NG-NI-NN-NI-HD-NS-NS-NN-NG-HD-NS-HD-NN-HD-HD-HD-NI-NG-NG	TAL20Xam668
Manes.02G132900.1.v7.0;pacid=41341336	258	+	0.308162	TATAAACCGGTGACCACCACA	4.61116e-05	NI-NG-NI-NN-NI-HD-NS-NS-NN-NG-HD-NS-HD-NN-HD-HD-HD-NI-NG-NG	TAL20Xam668
Manes.17G052000.1.v7.0;pacid=41330070	69	+	0.308156	CATTGACAAATCTCGCTCGCT	4.61234e-05	NI-NG-NI-NN-NI-HD-NS-NS-NN-NG-HD-NS-HD-NN-HD-HD-HD-NI-NG-NG	TAL20Xam668
Manes.13G096600.1.v7.0;pacid=41338317	90	+	0.308149	TCCAAACGCGACGCGCGCAAT	4.61359e-05	NI-NG-NI-NN-NI-HD-NS-NS-NN-NG-HD-NS-HD-NN-HD-HD-HD-NI-NG-NG	TAL20Xam668
Manes.07G022200.1.v7.0;pacid=41328973	6	-	0.308021	TAGAAAATAGTCTCATCCATG	4.63662e-05	NI-NG-NI-NN-NI-HD-NS-NS-NN-NG-HD-NS-HD-NN-HD-HD-HD-NI-NG-NG	TAL20Xam668
Manes.06G178100.1.v7.0;pacid=41304730	44	+	0.308014	TATCCATACATCACACACAAT	4.63779e-05	NI-NG-NI-NN-NI-HD-NS-NS-NN-NG-HD-NS-HD-NN-HD-HD-HD-NI-NG-NG	TAL20Xam668
Manes.08G116300.1.v7.0;pacid=41313406	318	+	0.307992	CATAGACCACACACGCTCACG	4.64184e-05	NI-NG-NI-NN-NI-HD-NS-NS-NN-NG-HD-NS-HD-NN-HD-HD-HD-NI-NG-NG	TAL20Xam668
Manes.12G144700.1.v7.0;pacid=41323140	226	+	0.307953	TATCTACAGATCGATCTCCTT	4.64876e-05	NI-NG-NI-NN-NI-HD-NS-NS-NN-NG-HD-NS-HD-NN-HD-HD-HD-NI-NG-NG	TAL20Xam668
Manes.18G113800.1.v7.0;pacid=41317450	76	-	0.307886	TATATAAAAACCCCACACAAT	4.66085e-05	NI-NG-NI-NN-NI-HD-NS-NS-NN-NG-HD-NS-HD-NN-HD-HD-HD-NI-NG-NG	TAL20Xam668
Manes.08G026100.1.v7.0;pacid=41314020	255	+	0.307883	TATATACTTGACACGTGCATC	4.66136e-05	NI-NG-NI-NN-NI-HD-NS-NS-NN-NG-HD-NS-HD-NN-HD-HD-HD-NI-NG-NG	TAL20Xam668
Manes.14G077500.1.v7.0;pacid=41331206	145	+	0.307851	TCTTGGCAGGTCACCCAAATT	4.66717e-05	NI-NG-NI-NN-NI-HD-NS-NS-NN-NG-HD-NS-HD-NN-HD-HD-HD-NI-NG-NG	TAL20Xam668
Manes.02G096600.1.v7.0;pacid=41341165	75	-	0.307842	AATAAATTGCTCCCTCCAATT	4.66884e-05	NI-NG-NI-NN-NI-HD-NS-NS-NN-NG-HD-NS-HD-NN-HD-HD-HD-NI-NG-NG	TAL20Xam668
Manes.02G096600.2.v7.0;pacid=41341166	75	-	0.307842	AATAAATTGCTCCCTCCAATT	4.66884e-05	NI-NG-NI-NN-NI-HD-NS-NS-NN-NG-HD-NS-HD-NN-HD-HD-HD-NI-NG-NG	TAL20Xam668
Manes.14G009100.1.v7.0;pacid=41331734	105	-	0.307787	ACTAGACAAGTATCACCAAGT	4.67889e-05	NI-NG-NI-NN-NI-HD-NS-NS-NN-NG-HD-NS-HD-NN-HD-HD-HD-NI-NG-NG	TAL20Xam668
Manes.01G202700.1.v7.0;pacid=41326458	64	+	0.307785	TATCGACGAATCTAGTGCATC	4.67922e-05	NI-NG-NI-NN-NI-HD-NS-NS-NN-NG-HD-NS-HD-NN-HD-HD-HD-NI-NG-NG	TAL20Xam668
Manes.05G095600.1.v7.0;pacid=41334952	118	+	0.307764	TTGAGAAACCTCTCCCCCCTT	4.68305e-05	NI-NG-NI-NN-NI-HD-NS-NS-NN-NG-HD-NS-HD-NN-HD-HD-HD-NI-NG-NG	TAL20Xam668
Manes.01G074400.1.v7.0;pacid=41326698	141	+	0.307743	TATATACACAACACACACACA	4.68678e-05	NI-NG-NI-NN-NI-HD-NS-NS-NN-NG-HD-NS-HD-NN-HD-HD-HD-NI-NG-NG	TAL20Xam668
Manes.08G007000.1.v7.0;pacid=41313057	266	+	0.307729	TTCAAACCCTTAACACCCAAT	4.6894e-05	NI-NG-NI-NN-NI-HD-NS-NS-NN-NG-HD-NS-HD-NN-HD-HD-HD-NI-NG-NG	TAL20Xam668
Manes.08G031700.1.v7.0;pacid=41312634	64	-	0.307719	TAAAACCCAATCCCACCAAAT	4.69123e-05	NI-NG-NI-NN-NI-HD-NS-NS-NN-NG-HD-NS-HD-NN-HD-HD-HD-NI-NG-NG	TAL20Xam668
Manes.14G091500.1.v7.0;pacid=41330940	224	+	0.307713	TTCAGTCTTCTCATACCCATT	4.69221e-05	NI-NG-NI-NN-NI-HD-NS-NS-NN-NG-HD-NS-HD-NN-HD-HD-HD-NI-NG-NG	TAL20Xam668
Manes.17G042600.1.v7.0;pacid=41330231	204	-	0.30771	TATTGACTATTCTCAACTACT	4.69281e-05	NI-NG-NI-NN-NI-HD-NS-NS-NN-NG-HD-NS-HD-NN-HD-HD-HD-NI-NG-NG	TAL20Xam668
Manes.16G061100.1.v7.0;pacid=41319092	449	+	0.307691	CATAAACCTATCGCCTCCCCT	4.69634e-05	NI-NG-NI-NN-NI-HD-NS-NS-NN-NG-HD-NS-HD-NN-HD-HD-HD-NI-NG-NG	TAL20Xam668
Manes.16G018900.1.v7.0;pacid=41318630	176	-	0.307666	TCTAGACACCTAACAAACATC	4.70088e-05	NI-NG-NI-NN-NI-HD-NS-NS-NN-NG-HD-NS-HD-NN-HD-HD-HD-NI-NG-NG	TAL20Xam668
Manes.16G018900.2.v7.0;pacid=41318631	176	-	0.307666	TCTAGACACCTAACAAACATC	4.70088e-05	NI-NG-NI-NN-NI-HD-NS-NS-NN-NG-HD-NS-HD-NN-HD-HD-HD-NI-NG-NG	TAL20Xam668
Manes.01G274700.1.v7.0;pacid=41325833	157	+	0.307657	TATAAACAAAACAGAGCCATT	4.70246e-05	NI-NG-NI-NN-NI-HD-NS-NS-NN-NG-HD-NS-HD-NN-HD-HD-HD-NI-NG-NG	TAL20Xam668
Manes.16G022000.1.v7.0;pacid=41319291	107	-	0.307655	AATAAACAATTCAAGCCTTTT	4.70285e-05	NI-NG-NI-NN-NI-HD-NS-NS-NN-NG-HD-NS-HD-NN-HD-HD-HD-NI-NG-NG	TAL20Xam668
Manes.06G100200.1.v7.0;pacid=41303204	161	-	0.307618	AATGGATTAGTCACTCTCATT	4.7095e-05	NI-NG-NI-NN-NI-HD-NS-NS-NN-NG-HD-NS-HD-NN-HD-HD-HD-NI-NG-NG	TAL20Xam668
Manes.S061300.1.v7.0;pacid=41323822	425	+	0.307565	AATTAAAAAGTCCAACTCATT	4.7192e-05	NI-NG-NI-NN-NI-HD-NS-NS-NN-NG-HD-NS-HD-NN-HD-HD-HD-NI-NG-NG	TAL20Xam668
Manes.03G129500.1.v7.0;pacid=41308354	324	-	0.307548	AATAGACAAATCAAAACCAGA	4.72232e-05	NI-NG-NI-NN-NI-HD-NS-NS-NN-NG-HD-NS-HD-NN-HD-HD-HD-NI-NG-NG	TAL20Xam668
Manes.09G092600.1.v7.0;pacid=41310718	313	-	0.307522	TATATAGGAAAAACTCCCATT	4.72717e-05	NI-NG-NI-NN-NI-HD-NS-NS-NN-NG-HD-NS-HD-NN-HD-HD-HD-NI-NG-NG	TAL20Xam668
Manes.01G026500.1.v7.0;pacid=41326325	33	-	0.307506	TTTAGCCCATTTTAACCCATT	4.73005e-05	NI-NG-NI-NN-NI-HD-NS-NS-NN-NG-HD-NS-HD-NN-HD-HD-HD-NI-NG-NG	TAL20Xam668
Manes.10G103500.1.v7.0;pacid=41321869	156	+	0.307444	TGTAGACAAATCCCTTCTCTT	4.74136e-05	NI-NG-NI-NN-NI-HD-NS-NS-NN-NG-HD-NS-HD-NN-HD-HD-HD-NI-NG-NG	TAL20Xam668
Manes.05G088900.1.v7.0;pacid=41335508	249	+	0.307432	TAAAATCAGCTCTTGCTCATT	4.74364e-05	NI-NG-NI-NN-NI-HD-NS-NS-NN-NG-HD-NS-HD-NN-HD-HD-HD-NI-NG-NG	TAL20Xam668
Manes.01G187400.1.v7.0;pacid=41325450	194	+	0.307423	TATAACCCTTTCCAACCCCCT	4.74528e-05	NI-NG-NI-NN-NI-HD-NS-NS-NN-NG-HD-NS-HD-NN-HD-HD-HD-NI-NG-NG	TAL20Xam668
Manes.03G037700.1.v7.0;pacid=41309129	37	+	0.307368	AATAGACGAGACTCCACCCTA	4.75537e-05	NI-NG-NI-NN-NI-HD-NS-NS-NN-NG-HD-NS-HD-NN-HD-HD-HD-NI-NG-NG	TAL20Xam668
Manes.08G041900.1.v7.0;pacid=41314311	102	+	0.307354	CATAGCACCACCACTCCCCTT	4.75807e-05	NI-NG-NI-NN-NI-HD-NS-NS-NN-NG-HD-NS-HD-NN-HD-HD-HD-NI-NG-NG	TAL20Xam668
Manes.02G180700.1.v7.0;pacid=41340465	71	+	0.30726	TATAGACCAGAAACCCACTCT	4.77542e-05	NI-NG-NI-NN-NI-HD-NS-NS-NN-NG-HD-NS-HD-NN-HD-HD-HD-NI-NG-NG	TAL20Xam668
Manes.18G041600.1.v7.0;pacid=41334342	81	+	0.307191	AATAGACCCACCACCTCCAAT	4.78822e-05	NI-NG-NI-NN-NI-HD-NS-NS-NN-NG-HD-NS-HD-NN-HD-HD-HD-NI-NG-NG	TAL20Xam668
Manes.05G196300.1.v7.0;pacid=41335972	165	+	0.307188	TATAATTTAGTCCCTACCGTT	4.78861e-05	NI-NG-NI-NN-NI-HD-NS-NS-NN-NG-HD-NS-HD-NN-HD-HD-HD-NI-NG-NG	TAL20Xam668
Manes.09G122400.1.v7.0;pacid=41310326	241	-	0.307184	CGTGCAAGTGTCAAACCCATT	4.78936e-05	NI-NG-NI-NN-NI-HD-NS-NS-NN-NG-HD-NS-HD-NN-HD-HD-HD-NI-NG-NG	TAL20Xam668
Manes.17G115300.1.v7.0;pacid=41330129	6	-	0.307116	TATACACGAGTTGTACGAATT	4.80206e-05	NI-NG-NI-NN-NI-HD-NS-NS-NN-NG-HD-NS-HD-NN-HD-HD-HD-NI-NG-NG	TAL20Xam668
Manes.09G056300.1.v7.0;pacid=41310958	59	-	0.307115	TATTAACAAATCCATCACATC	4.80225e-05	NI-NG-NI-NN-NI-HD-NS-NS-NN-NG-HD-NS-HD-NN-HD-HD-HD-NI-NG-NG	TAL20Xam668
Manes.16G076000.1.v7.0;pacid=41319330	244	-	0.307029	TAAAGACTAAAAAAACCCCTT	4.81835e-05	NI-NG-NI-NN-NI-HD-NS-NS-NN-NG-HD-NS-HD-NN-HD-HD-HD-NI-NG-NG	TAL20Xam668
Manes.04G116300.1.v7.0;pacid=41315640	189	-	0.307016	TATCGACAAGGCACCAACACT	4.82075e-05	NI-NG-NI-NN-NI-HD-NS-NS-NN-NG-HD-NS-HD-NN-HD-HD-HD-NI-NG-NG	TAL20Xam668
Manes.14G159900.1.v7.0;pacid=41332523	58	-	0.307003	TATAAACTGCTCAACAACAAT	4.82304e-05	NI-NG-NI-NN-NI-HD-NS-NS-NN-NG-HD-NS-HD-NN-HD-HD-HD-NI-NG-NG	TAL20Xam668
Manes.02G080900.1.v7.0;pacid=41340705	110	+	0.306982	TTGAAACGATTCACGTCAATT	4.82706e-05	NI-NG-NI-NN-NI-HD-NS-NS-NN-NG-HD-NS-HD-NN-HD-HD-HD-NI-NG-NG	TAL20Xam668
Manes.02G080900.2.v7.0;pacid=41340706	113	+	0.306982	TTGAAACGATTCACGTCAATT	4.82706e-05	NI-NG-NI-NN-NI-HD-NS-NS-NN-NG-HD-NS-HD-NN-HD-HD-HD-NI-NG-NG	TAL20Xam668
Manes.01G020900.1.v7.0;pacid=41324154	177	-	0.306861	TAGAATCATTTCACGACAATT	4.84964e-05	NI-NG-NI-NN-NI-HD-NS-NS-NN-NG-HD-NS-HD-NN-HD-HD-HD-NI-NG-NG	TAL20Xam668
Manes.01G004300.1.v7.0;pacid=41325680	270	+	0.306859	CATAAACCAAACGAGCCCTTG	4.85009e-05	NI-NG-NI-NN-NI-HD-NS-NS-NN-NG-HD-NS-HD-NN-HD-HD-HD-NI-NG-NG	TAL20Xam668
Manes.13G096200.1.v7.0;pacid=41337539	109	+	0.306837	TGTGGACAAGTCTCGCATATG	4.85413e-05	NI-NG-NI-NN-NI-HD-NS-NS-NN-NG-HD-NS-HD-NN-HD-HD-HD-NI-NG-NG	TAL20Xam668
Manes.12G063600.1.v7.0;pacid=41322998	208	+	0.306834	TATAAATAAATTGATCACATT	4.85485e-05	NI-NG-NI-NN-NI-HD-NS-NS-NN-NG-HD-NS-HD-NN-HD-HD-HD-NI-NG-NG	TAL20Xam668
Manes.09G030700.1.v7.0;pacid=41311014	134	+	0.306803	TATTGACTGCTACCGCACACA	4.86058e-05	NI-NG-NI-NN-NI-HD-NS-NS-NN-NG-HD-NS-HD-NN-HD-HD-HD-NI-NG-NG	TAL20Xam668
Manes.16G060100.1.v7.0;pacid=41319542	114	-	0.3068	TATGATCTTGTATCATCCATT	4.8612e-05	NI-NG-NI-NN-NI-HD-NS-NS-NN-NG-HD-NS-HD-NN-HD-HD-HD-NI-NG-NG	TAL20Xam668
Manes.08G153800.1.v7.0;pacid=41313941	223	+	0.30677	AAAAGATAGGTCCCACCACTT	4.8669e-05	NI-NG-NI-NN-NI-HD-NS-NS-NN-NG-HD-NS-HD-NN-HD-HD-HD-NI-NG-NG	TAL20Xam668
Manes.10G135600.1.v7.0;pacid=41322008	257	+	0.30672	TATAAAAATCCCACACCTGTT	4.87621e-05	NI-NG-NI-NN-NI-HD-NS-NS-NN-NG-HD-NS-HD-NN-HD-HD-HD-NI-NG-NG	TAL20Xam668
Manes.13G136400.2.v7.0;pacid=41338960	93	-	0.306712	CAAACACTAGTAACGCATATT	4.87766e-05	NI-NG-NI-NN-NI-HD-NS-NS-NN-NG-HD-NS-HD-NN-HD-HD-HD-NI-NG-NG	TAL20Xam668
Manes.01G234200.1.v7.0;pacid=41327020	165	+	0.306693	TATTTATGGGTCCCTCCCACC	4.88132e-05	NI-NG-NI-NN-NI-HD-NS-NS-NN-NG-HD-NS-HD-NN-HD-HD-HD-NI-NG-NG	TAL20Xam668
Manes.13G011200.1.v7.0;pacid=41337326	216	+	0.30668	CCAAGACCTCCCCCGCCCATC	4.88379e-05	NI-NG-NI-NN-NI-HD-NS-NS-NN-NG-HD-NS-HD-NN-HD-HD-HD-NI-NG-NG	TAL20Xam668
Manes.13G011200.3.v7.0;pacid=41337327	216	+	0.30668	CCAAGACCTCCCCCGCCCATC	4.88379e-05	NI-NG-NI-NN-NI-HD-NS-NS-NN-NG-HD-NS-HD-NN-HD-HD-HD-NI-NG-NG	TAL20Xam668
Manes.13G011200.2.v7.0;pacid=41337328	216	+	0.30668	CCAAGACCTCCCCCGCCCATC	4.88379e-05	NI-NG-NI-NN-NI-HD-NS-NS-NN-NG-HD-NS-HD-NN-HD-HD-HD-NI-NG-NG	TAL20Xam668
Manes.14G027900.1.v7.0;pacid=41330999	180	+	0.306674	CCAAGACAGTGCACGCCCTTT	4.88493e-05	NI-NG-NI-NN-NI-HD-NS-NS-NN-NG-HD-NS-HD-NN-HD-HD-HD-NI-NG-NG	TAL20Xam668
Manes.05G130600.1.v7.0;pacid=41335790	218	+	0.306636	TACAAAATAATCTCCATCATT	4.89207e-05	NI-NG-NI-NN-NI-HD-NS-NS-NN-NG-HD-NS-HD-NN-HD-HD-HD-NI-NG-NG	TAL20Xam668
Manes.03G176400.1.v7.0;pacid=41309740	256	+	0.30662	TATAAACGAGTCCTTTCCTCT	4.89509e-05	NI-NG-NI-NN-NI-HD-NS-NS-NN-NG-HD-NS-HD-NN-HD-HD-HD-NI-NG-NG	TAL20Xam668
Manes.03G130000.1.v7.0;pacid=41307455	299	+	0.30661	TGTCCGCCCGCCACTCCCATT	4.89701e-05	NI-NG-NI-NN-NI-HD-NS-NS-NN-NG-HD-NS-HD-NN-HD-HD-HD-NI-NG-NG	TAL20Xam668
Manes.14G093400.1.v7.0;pacid=41331356	256	+	0.306602	TATCTCATATTCCAACCCATT	4.89848e-05	NI-NG-NI-NN-NI-HD-NS-NS-NN-NG-HD-NS-HD-NN-HD-HD-HD-NI-NG-NG	TAL20Xam668
Manes.04G067600.1.v7.0;pacid=41314884	251	+	0.306537	TAAAAAAAGAACCCGACTATT	4.91096e-05	NI-NG-NI-NN-NI-HD-NS-NS-NN-NG-HD-NS-HD-NN-HD-HD-HD-NI-NG-NG	TAL20Xam668
Manes.01G087300.1.v7.0;pacid=41327246	160	-	0.306513	CATGGGAGATTCCCGCCAATT	4.91542e-05	NI-NG-NI-NN-NI-HD-NS-NS-NN-NG-HD-NS-HD-NN-HD-HD-HD-NI-NG-NG	TAL20Xam668
Manes.18G002800.1.v7.0;pacid=41333116	233	+	0.306511	AATAAACACTTTACGCACACT	4.91589e-05	NI-NG-NI-NN-NI-HD-NS-NS-NN-NG-HD-NS-HD-NN-HD-HD-HD-NI-NG-NG	TAL20Xam668
Manes.09G103500.1.v7.0;pacid=41310910	268	+	0.306509	TATAAACCCCTCATAACCTCT	4.91627e-05	NI-NG-NI-NN-NI-HD-NS-NS-NN-NG-HD-NS-HD-NN-HD-HD-HD-NI-NG-NG	TAL20Xam668
Manes.03G047700.1.v7.0;pacid=41308236	213	-	0.306494	TAAAAATTATTTTCACCCATT	4.91904e-05	NI-NG-NI-NN-NI-HD-NS-NS-NN-NG-HD-NS-HD-NN-HD-HD-HD-NI-NG-NG	TAL20Xam668
Manes.12G056700.1.v7.0;pacid=41322493	140	+	0.306481	TCTGGATTTTTCTCGCCCCTT	4.92149e-05	NI-NG-NI-NN-NI-HD-NS-NS-NN-NG-HD-NS-HD-NN-HD-HD-HD-NI-NG-NG	TAL20Xam668
Manes.11G127900.1.v7.0;pacid=41318210	269	+	0.306433	TATATGCGGCTTGCGCCTATC	4.93072e-05	NI-NG-NI-NN-NI-HD-NS-NS-NN-NG-HD-NS-HD-NN-HD-HD-HD-NI-NG-NG	TAL20Xam668
Manes.06G113300.1.v7.0;pacid=41302732	151	-	0.306432	TGTTGACCACTCTCGCTTATT	4.93079e-05	NI-NG-NI-NN-NI-HD-NS-NS-NN-NG-HD-NS-HD-NN-HD-HD-HD-NI-NG-NG	TAL20Xam668
Manes.05G148600.1.v7.0;pacid=41336797	278	+	0.306385	TTCAGCCCATTATAGCCCATT	4.93984e-05	NI-NG-NI-NN-NI-HD-NS-NS-NN-NG-HD-NS-HD-NN-HD-HD-HD-NI-NG-NG	TAL20Xam668
Manes.01G254400.1.v7.0;pacid=41324211	225	+	0.306364	TCTAACCAGCACAAAACCATT	4.9439e-05	NI-NG-NI-NN-NI-HD-NS-NS-NN-NG-HD-NS-HD-NN-HD-HD-HD-NI-NG-NG	TAL20Xam668
Manes.14G139400.1.v7.0;pacid=41331713	218	+	0.30636	TATATAAGAGTCTCTCTCTCT	4.94457e-05	NI-NG-NI-NN-NI-HD-NS-NS-NN-NG-HD-NS-HD-NN-HD-HD-HD-NI-NG-NG	TAL20Xam668
Manes.02G205600.1.v7.0;pacid=41340285	178	-	0.306304	TATAAACAAATCACTAATATA	4.95539e-05	NI-NG-NI-NN-NI-HD-NS-NS-NN-NG-HD-NS-HD-NN-HD-HD-HD-NI-NG-NG	TAL20Xam668
Manes.14G143500.1.v7.0;pacid=41332022	117	+	0.306272	TCCAGAACGGTCTAGCCAACT	4.96146e-05	NI-NG-NI-NN-NI-HD-NS-NS-NN-NG-HD-NS-HD-NN-HD-HD-HD-NI-NG-NG	TAL20Xam668
Manes.18G001100.1.v7.0;pacid=41334524	243	+	0.306253	TATCGCCGAGTCCCCCCTCCT	4.96505e-05	NI-NG-NI-NN-NI-HD-NS-NS-NN-NG-HD-NS-HD-NN-HD-HD-HD-NI-NG-NG	TAL20Xam668
Manes.05G206200.1.v7.0;pacid=41336192	73	+	0.306247	TTTAAACCCAACCAACCGATT	4.96632e-05	NI-NG-NI-NN-NI-HD-NS-NS-NN-NG-HD-NS-HD-NN-HD-HD-HD-NI-NG-NG	TAL20Xam668
Manes.18G001000.1.v7.0;pacid=41334168	172	-	0.306238	TATAACAGGGCAGCGACAATT	4.96793e-05	NI-NG-NI-NN-NI-HD-NS-NS-NN-NG-HD-NS-HD-NN-HD-HD-HD-NI-NG-NG	TAL20Xam668
Manes.18G103500.1.v7.0;pacid=41333580	37	+	0.306226	AATAAACGTATCACACCAGAT	4.97034e-05	NI-NG-NI-NN-NI-HD-NS-NS-NN-NG-HD-NS-HD-NN-HD-HD-HD-NI-NG-NG	TAL20Xam668
Manes.17G028500.1.v7.0;pacid=41330256	262	+	0.306214	TATAGATGATGAGTTCCCATT	4.97253e-05	NI-NG-NI-NN-NI-HD-NS-NS-NN-NG-HD-NS-HD-NN-HD-HD-HD-NI-NG-NG	TAL20Xam668
Manes.18G145700.1.v7.0;pacid=41334434	182	+	0.306199	TTTAAACGGTTCACATCCCAT	4.97539e-05	NI-NG-NI-NN-NI-HD-NS-NS-NN-NG-HD-NS-HD-NN-HD-HD-HD-NI-NG-NG	TAL20Xam668
Manes.11G116900.1.v7.0;pacid=41317097	157	+	0.306168	TGTAGAAATCTTAAAACCATT	4.98136e-05	NI-NG-NI-NN-NI-HD-NS-NS-NN-NG-HD-NS-HD-NN-HD-HD-HD-NI-NG-NG	TAL20Xam668
Manes.02G071000.1.v7.0;pacid=41340301	226	+	0.306091	TATGCAAAATTATCACCCTTT	4.99622e-05	NI-NG-NI-NN-NI-HD-NS-NS-NN-NG-HD-NS-HD-NN-HD-HD-HD-NI-NG-NG	TAL20Xam668
Manes.15G053300.1.v7.0;pacid=41305668	290	+	0.306087	AATACACACATCCAATCCATA	4.99713e-05	NI-NG-NI-NN-NI-HD-NS-NS-NN-NG-HD-NS-HD-NN-HD-HD-HD-NI-NG-NG	TAL20Xam668
Manes.15G053300.2.v7.0;pacid=41305669	290	+	0.306087	AATACACACATCCAATCCATA	4.99713e-05	NI-NG-NI-NN-NI-HD-NS-NS-NN-NG-HD-NS-HD-NN-HD-HD-HD-NI-NG-NG	TAL20Xam668
Manes.06G167000.1.v7.0;pacid=41303372	413	+	0.306083	TATAAAACTGTAAATCCAATC	4.99775e-05	NI-NG-NI-NN-NI-HD-NS-NS-NN-NG-HD-NS-HD-NN-HD-HD-HD-NI-NG-NG	TAL20Xam668
Manes.06G167000.2.v7.0;pacid=41303373	413	+	0.306083	TATAAAACTGTAAATCCAATC	4.99775e-05	NI-NG-NI-NN-NI-HD-NS-NS-NN-NG-HD-NS-HD-NN-HD-HD-HD-NI-NG-NG	TAL20Xam668
Manes.04G057300.3.v7.0;pacid=41314965	249	-	0.306058	AATAAATTTATAACAACCATT	5.0027e-05	NI-NG-NI-NN-NI-HD-NS-NS-NN-NG-HD-NS-HD-NN-HD-HD-HD-NI-NG-NG	TAL20Xam668
Manes.02G211400.1.v7.0;pacid=41340771	160	-	0.306042	AAATGACAGATCCAGCACATT	5.00583e-05	NI-NG-NI-NN-NI-HD-NS-NS-NN-NG-HD-NS-HD-NN-HD-HD-HD-NI-NG-NG	TAL20Xam668
Manes.06G069400.1.v7.0;pacid=41304667	218	-	0.306038	TATAAAAAAATCTCACTTAAT	5.00649e-05	NI-NG-NI-NN-NI-HD-NS-NS-NN-NG-HD-NS-HD-NN-HD-HD-HD-NI-NG-NG	TAL20Xam668
Manes.15G002400.1.v7.0;pacid=41305009	203	+	0.306019	TACTTAAACATCTCACCCATA	5.01011e-05	NI-NG-NI-NN-NI-HD-NS-NS-NN-NG-HD-NS-HD-NN-HD-HD-HD-NI-NG-NG	TAL20Xam668
Manes.13G051500.1.v7.0;pacid=41337744	106	+	0.306004	TATTAAAATATAAAACACATT	5.01318e-05	NI-NG-NI-NN-NI-HD-NS-NS-NN-NG-HD-NS-HD-NN-HD-HD-HD-NI-NG-NG	TAL20Xam668
Manes.13G051500.2.v7.0;pacid=41337745	106	+	0.306004	TATTAAAATATAAAACACATT	5.01318e-05	NI-NG-NI-NN-NI-HD-NS-NS-NN-NG-HD-NS-HD-NN-HD-HD-HD-NI-NG-NG	TAL20Xam668
Manes.13G145600.1.v7.0;pacid=41337944	226	-	0.306001	TATATACCCAACATCCACATT	5.01371e-05	NI-NG-NI-NN-NI-HD-NS-NS-NN-NG-HD-NS-HD-NN-HD-HD-HD-NI-NG-NG	TAL20Xam668
Manes.02G052600.1.v7.0;pacid=41340678	227	+	0.305996	TATACTCTGAACACACTCATC	5.01456e-05	NI-NG-NI-NN-NI-HD-NS-NS-NN-NG-HD-NS-HD-NN-HD-HD-HD-NI-NG-NG	TAL20Xam668
Manes.16G023400.1.v7.0;pacid=41318871	264	+	0.305991	TTTAGACAACTCTCTTCCACC	5.01568e-05	NI-NG-NI-NN-NI-HD-NS-NS-NN-NG-HD-NS-HD-NN-HD-HD-HD-NI-NG-NG	TAL20Xam668
Manes.11G041700.1.v7.0;pacid=41317980	84	+	0.30598	TATATACGCAACAAACTCATG	5.0177e-05	NI-NG-NI-NN-NI-HD-NS-NS-NN-NG-HD-NS-HD-NN-HD-HD-HD-NI-NG-NG	TAL20Xam668
Manes.17G101000.1.v7.0;pacid=41329864	56	-	0.305941	TAAAAAAAGATCACTCCATTT	5.02534e-05	NI-NG-NI-NN-NI-HD-NS-NS-NN-NG-HD-NS-HD-NN-HD-HD-HD-NI-NG-NG	TAL20Xam668
Manes.17G101000.2.v7.0;pacid=41329865	56	-	0.305941	TAAAAAAAGATCACTCCATTT	5.02534e-05	NI-NG-NI-NN-NI-HD-NS-NS-NN-NG-HD-NS-HD-NN-HD-HD-HD-NI-NG-NG	TAL20Xam668
Manes.03G044000.1.v7.0;pacid=41309229	335	+	0.305924	TACCAACAGATAAAACCTATT	5.02859e-05	NI-NG-NI-NN-NI-HD-NS-NS-NN-NG-HD-NS-HD-NN-HD-HD-HD-NI-NG-NG	TAL20Xam668
Manes.08G053500.1.v7.0;pacid=41312841	160	+	0.305924	TCAAATCTTCTCCCGCCAATT	5.02868e-05	NI-NG-NI-NN-NI-HD-NS-NS-NN-NG-HD-NS-HD-NN-HD-HD-HD-NI-NG-NG	TAL20Xam668
Manes.14G009200.1.v7.0;pacid=41331053	93	+	0.305911	TAAAAACTTCCCGCACCCCTC	5.03112e-05	NI-NG-NI-NN-NI-HD-NS-NS-NN-NG-HD-NS-HD-NN-HD-HD-HD-NI-NG-NG	TAL20Xam668
Manes.13G028900.1.v7.0;pacid=41337909	122	+	0.305898	TATCCCCCCCCCCCGCCCTTT	5.03367e-05	NI-NG-NI-NN-NI-HD-NS-NS-NN-NG-HD-NS-HD-NN-HD-HD-HD-NI-NG-NG	TAL20Xam668
Manes.02G006400.1.v7.0;pacid=41341032	144	-	0.305897	CAAAGTCAACTAGCACTCATT	5.03382e-05	NI-NG-NI-NN-NI-HD-NS-NS-NN-NG-HD-NS-HD-NN-HD-HD-HD-NI-NG-NG	TAL20Xam668
Manes.15G107100.1.v7.0;pacid=41307222	273	+	0.305885	TATAGGTCACTACAAACCATT	5.03612e-05	NI-NG-NI-NN-NI-HD-NS-NS-NN-NG-HD-NS-HD-NN-HD-HD-HD-NI-NG-NG	TAL20Xam668
Manes.06G153000.1.v7.0;pacid=41304680	157	+	0.305885	TATACGCCTCTCCCTCATATT	5.03625e-05	NI-NG-NI-NN-NI-HD-NS-NS-NN-NG-HD-NS-HD-NN-HD-HD-HD-NI-NG-NG	TAL20Xam668
Manes.11G071400.1.v7.0;pacid=41318241	39	-	0.305872	CACCGACACGTCACTCCCTCT	5.03871e-05	NI-NG-NI-NN-NI-HD-NS-NS-NN-NG-HD-NS-HD-NN-HD-HD-HD-NI-NG-NG	TAL20Xam668
Manes.13G070700.1.v7.0;pacid=41338279	129	+	0.305804	AACATCCTAATCCCGCACATT	5.05206e-05	NI-NG-NI-NN-NI-HD-NS-NS-NN-NG-HD-NS-HD-NN-HD-HD-HD-NI-NG-NG	TAL20Xam668
Manes.16G000600.1.v7.0;pacid=41318904	154	+	0.305798	CCTAAACCAGACCATCCCACT	5.05319e-05	NI-NG-NI-NN-NI-HD-NS-NS-NN-NG-HD-NS-HD-NN-HD-HD-HD-NI-NG-NG	TAL20Xam668
Manes.16G000600.2.v7.0;pacid=41318905	154	+	0.305798	CCTAAACCAGACCATCCCACT	5.05319e-05	NI-NG-NI-NN-NI-HD-NS-NS-NN-NG-HD-NS-HD-NN-HD-HD-HD-NI-NG-NG	TAL20Xam668
Manes.11G034900.1.v7.0;pacid=41317624	229	+	0.305792	TATTGACAAAACACACACACA	5.0543e-05	NI-NG-NI-NN-NI-HD-NS-NS-NN-NG-HD-NS-HD-NN-HD-HD-HD-NI-NG-NG	TAL20Xam668
Manes.04G091400.1.v7.0;pacid=41314645	258	+	0.305779	CATTCTCAGGCAGCGACCATT	5.05678e-05	NI-NG-NI-NN-NI-HD-NS-NS-NN-NG-HD-NS-HD-NN-HD-HD-HD-NI-NG-NG	TAL20Xam668
Manes.01G069000.1.v7.0;pacid=41325910	219	+	0.305764	CAGAGATAAAACACGCGCATT	5.05975e-05	NI-NG-NI-NN-NI-HD-NS-NS-NN-NG-HD-NS-HD-NN-HD-HD-HD-NI-NG-NG	TAL20Xam668
Manes.01G069000.2.v7.0;pacid=41325911	219	+	0.305764	CAGAGATAAAACACGCGCATT	5.05975e-05	NI-NG-NI-NN-NI-HD-NS-NS-NN-NG-HD-NS-HD-NN-HD-HD-HD-NI-NG-NG	TAL20Xam668
Manes.05G090900.1.v7.0;pacid=41335580	159	+	0.305732	TATTAAAAAATCAAACCAAAT	5.06609e-05	NI-NG-NI-NN-NI-HD-NS-NS-NN-NG-HD-NS-HD-NN-HD-HD-HD-NI-NG-NG	TAL20Xam668
Manes.05G086600.1.v7.0;pacid=41335129	195	+	0.305721	TATATATAGGGCACTATCATT	5.06819e-05	NI-NG-NI-NN-NI-HD-NS-NS-NN-NG-HD-NS-HD-NN-HD-HD-HD-NI-NG-NG	TAL20Xam668
Manes.13G137300.1.v7.0;pacid=41338348	223	+	0.305671	TAAAGATAGGCCCACCCCAAT	5.07799e-05	NI-NG-NI-NN-NI-HD-NS-NS-NN-NG-HD-NS-HD-NN-HD-HD-HD-NI-NG-NG	TAL20Xam668
Manes.08G069700.1.v7.0;pacid=41312618	8	-	0.305651	TATCAACCAATAGCCCTCACT	5.0818e-05	NI-NG-NI-NN-NI-HD-NS-NS-NN-NG-HD-NS-HD-NN-HD-HD-HD-NI-NG-NG	TAL20Xam668
Manes.09G168300.1.v7.0;pacid=41310252	266	-	0.30565	TATAAACTAAACACGCTGACT	5.08202e-05	NI-NG-NI-NN-NI-HD-NS-NS-NN-NG-HD-NS-HD-NN-HD-HD-HD-NI-NG-NG	TAL20Xam668
Manes.10G149500.1.v7.0;pacid=41320497	163	+	0.305603	TATAGATTAGACGCGTACATG	5.09134e-05	NI-NG-NI-NN-NI-HD-NS-NS-NN-NG-HD-NS-HD-NN-HD-HD-HD-NI-NG-NG	TAL20Xam668
Manes.17G109000.1.v7.0;pacid=41330059	0	-	0.305555	TATACAACTTTATCGACTATT	5.10083e-05	NI-NG-NI-NN-NI-HD-NS-NS-NN-NG-HD-NS-HD-NN-HD-HD-HD-NI-NG-NG	TAL20Xam668
Manes.18G043900.1.v7.0;pacid=41333948	268	+	0.305551	CTTAGACTGATCAAATCCAGT	5.10145e-05	NI-NG-NI-NN-NI-HD-NS-NS-NN-NG-HD-NS-HD-NN-HD-HD-HD-NI-NG-NG	TAL20Xam668
Manes.08G011500.1.v7.0;pacid=41314279	268	+	0.305548	TAGAGACTTATCACCCACAAC	5.10207e-05	NI-NG-NI-NN-NI-HD-NS-NS-NN-NG-HD-NS-HD-NN-HD-HD-HD-NI-NG-NG	TAL20Xam668
Manes.09G120900.1.v7.0;pacid=41310803	47	+	0.305532	TATTTAAATATCTCAATCATT	5.1052e-05	NI-NG-NI-NN-NI-HD-NS-NS-NN-NG-HD-NS-HD-NN-HD-HD-HD-NI-NG-NG	TAL20Xam668
Manes.04G024500.1.v7.0;pacid=41314550	31	+	0.305529	CATAAGCCCGTCTAGCTCAGT	5.10581e-05	NI-NG-NI-NN-NI-HD-NS-NS-NN-NG-HD-NS-HD-NN-HD-HD-HD-NI-NG-NG	TAL20Xam668
Manes.04G024500.2.v7.0;pacid=41314551	31	+	0.305529	CATAAGCCCGTCTAGCTCAGT	5.10581e-05	NI-NG-NI-NN-NI-HD-NS-NS-NN-NG-HD-NS-HD-NN-HD-HD-HD-NI-NG-NG	TAL20Xam668
Manes.13G054400.1.v7.0;pacid=41338979	236	-	0.305499	TACAAACAATTATCACCAACT	5.11183e-05	NI-NG-NI-NN-NI-HD-NS-NS-NN-NG-HD-NS-HD-NN-HD-HD-HD-NI-NG-NG	TAL20Xam668
Manes.15G076500.1.v7.0;pacid=41306606	270	-	0.305456	TTCACAAAGGTCTCTCCTATT	5.12019e-05	NI-NG-NI-NN-NI-HD-NS-NS-NN-NG-HD-NS-HD-NN-HD-HD-HD-NI-NG-NG	TAL20Xam668
Manes.02G196000.1.v7.0;pacid=41339697	268	-	0.305451	CATTGAAAGATCTCACCAAGT	5.1212e-05	NI-NG-NI-NN-NI-HD-NS-NS-NN-NG-HD-NS-HD-NN-HD-HD-HD-NI-NG-NG	TAL20Xam668
Manes.02G226800.1.v7.0;pacid=41341703	55	+	0.305451	TTTAAACTAGTCATGAAAATT	5.12126e-05	NI-NG-NI-NN-NI-HD-NS-NS-NN-NG-HD-NS-HD-NN-HD-HD-HD-NI-NG-NG	TAL20Xam668
Manes.15G070000.1.v7.0;pacid=41307009	198	-	0.305438	TATCATCACGTCTAGCCAATC	5.12386e-05	NI-NG-NI-NN-NI-HD-NS-NS-NN-NG-HD-NS-HD-NN-HD-HD-HD-NI-NG-NG	TAL20Xam668
Manes.12G091000.1.v7.0;pacid=41322881	178	-	0.30543	TCTAGGCGGATCAAACTCATC	5.12533e-05	NI-NG-NI-NN-NI-HD-NS-NS-NN-NG-HD-NS-HD-NN-HD-HD-HD-NI-NG-NG	TAL20Xam668
Manes.02G012500.1.v7.0;pacid=41340217	213	+	0.305402	TCTCTAATGCTAACTCCCATT	5.13095e-05	NI-NG-NI-NN-NI-HD-NS-NS-NN-NG-HD-NS-HD-NN-HD-HD-HD-NI-NG-NG	TAL20Xam668
Manes.06G070100.1.v7.0;pacid=41304207	318	+	0.305339	CAAAGACCTCCCTCTCCCTTT	5.14344e-05	NI-NG-NI-NN-NI-HD-NS-NS-NN-NG-HD-NS-HD-NN-HD-HD-HD-NI-NG-NG	TAL20Xam668
Manes.12G041000.1.v7.0;pacid=41323365	83	+	0.305324	CGTAAACCAGGTACGCACATT	5.14639e-05	NI-NG-NI-NN-NI-HD-NS-NS-NN-NG-HD-NS-HD-NN-HD-HD-HD-NI-NG-NG	TAL20Xam668
Manes.12G041000.2.v7.0;pacid=41323366	83	+	0.305324	CGTAAACCAGGTACGCACATT	5.14639e-05	NI-NG-NI-NN-NI-HD-NS-NS-NN-NG-HD-NS-HD-NN-HD-HD-HD-NI-NG-NG	TAL20Xam668
Manes.03G198900.1.v7.0;pacid=41308145	277	-	0.305287	TATAAACAATTATCACCAACA	5.1538e-05	NI-NG-NI-NN-NI-HD-NS-NS-NN-NG-HD-NS-HD-NN-HD-HD-HD-NI-NG-NG	TAL20Xam668
Manes.02G105600.2.v7.0;pacid=41340287	5	-	0.305268	AAAAGAAAATTCAAAACCATT	5.15757e-05	NI-NG-NI-NN-NI-HD-NS-NS-NN-NG-HD-NS-HD-NN-HD-HD-HD-NI-NG-NG	TAL20Xam668
Manes.04G020300.1.v7.0;pacid=41314621	86	+	0.305206	CATAGACAGGTGTCGCACTTA	5.16998e-05	NI-NG-NI-NN-NI-HD-NS-NS-NN-NG-HD-NS-HD-NN-HD-HD-HD-NI-NG-NG	TAL20Xam668
Manes.13G048200.1.v7.0;pacid=41337241	225	+	0.305197	TCTAAACCTGCCACCCCTTTT	5.17163e-05	NI-NG-NI-NN-NI-HD-NS-NS-NN-NG-HD-NS-HD-NN-HD-HD-HD-NI-NG-NG	TAL20Xam668
Manes.06G160500.1.v7.0;pacid=41302992	82	-	0.305181	AATATACACTTCACTACCTTT	5.17491e-05	NI-NG-NI-NN-NI-HD-NS-NS-NN-NG-HD-NS-HD-NN-HD-HD-HD-NI-NG-NG	TAL20Xam668
Manes.06G160800.1.v7.0;pacid=41304635	96	-	0.305181	AATATACACTTCACTACCTTT	5.17491e-05	NI-NG-NI-NN-NI-HD-NS-NS-NN-NG-HD-NS-HD-NN-HD-HD-HD-NI-NG-NG	TAL20Xam668
Manes.06G160800.3.v7.0;pacid=41304636	96	-	0.305181	AATATACACTTCACTACCTTT	5.17491e-05	NI-NG-NI-NN-NI-HD-NS-NS-NN-NG-HD-NS-HD-NN-HD-HD-HD-NI-NG-NG	TAL20Xam668
Manes.06G160800.4.v7.0;pacid=41304637	96	-	0.305181	AATATACACTTCACTACCTTT	5.17491e-05	NI-NG-NI-NN-NI-HD-NS-NS-NN-NG-HD-NS-HD-NN-HD-HD-HD-NI-NG-NG	TAL20Xam668
Manes.06G160800.5.v7.0;pacid=41304638	96	-	0.305181	AATATACACTTCACTACCTTT	5.17491e-05	NI-NG-NI-NN-NI-HD-NS-NS-NN-NG-HD-NS-HD-NN-HD-HD-HD-NI-NG-NG	TAL20Xam668
Manes.06G160800.2.v7.0;pacid=41304639	96	-	0.305181	AATATACACTTCACTACCTTT	5.17491e-05	NI-NG-NI-NN-NI-HD-NS-NS-NN-NG-HD-NS-HD-NN-HD-HD-HD-NI-NG-NG	TAL20Xam668
Manes.06G160800.6.v7.0;pacid=41304640	96	-	0.305181	AATATACACTTCACTACCTTT	5.17491e-05	NI-NG-NI-NN-NI-HD-NS-NS-NN-NG-HD-NS-HD-NN-HD-HD-HD-NI-NG-NG	TAL20Xam668
Manes.08G056800.1.v7.0;pacid=41313527	436	-	0.305171	AATAAACCCATCAAACTCAAT	5.17697e-05	NI-NG-NI-NN-NI-HD-NS-NS-NN-NG-HD-NS-HD-NN-HD-HD-HD-NI-NG-NG	TAL20Xam668
Manes.02G055000.1.v7.0;pacid=41339462	190	+	0.305167	TATAGAAAAATCAACAGCAGT	5.17762e-05	NI-NG-NI-NN-NI-HD-NS-NS-NN-NG-HD-NS-HD-NN-HD-HD-HD-NI-NG-NG	TAL20Xam668
Manes.14G119900.1.v7.0;pacid=41331646	257	+	0.305159	TTTAAATGACTCTCGCTCATA	5.17918e-05	NI-NG-NI-NN-NI-HD-NS-NS-NN-NG-HD-NS-HD-NN-HD-HD-HD-NI-NG-NG	TAL20Xam668
Manes.06G074200.1.v7.0;pacid=41302987	286	+	0.305147	TATAAAATCATCCATCTCCTT	5.18171e-05	NI-NG-NI-NN-NI-HD-NS-NS-NN-NG-HD-NS-HD-NN-HD-HD-HD-NI-NG-NG	TAL20Xam668
Manes.10G117200.1.v7.0;pacid=41321696	204	+	0.305133	TATATATTGCACCAGCCCACT	5.1844e-05	NI-NG-NI-NN-NI-HD-NS-NS-NN-NG-HD-NS-HD-NN-HD-HD-HD-NI-NG-NG	TAL20Xam668
Manes.08G026500.1.v7.0;pacid=41312605	228	-	0.305083	TATTAACAAATTGATCCCATA	5.19441e-05	NI-NG-NI-NN-NI-HD-NS-NS-NN-NG-HD-NS-HD-NN-HD-HD-HD-NI-NG-NG	TAL20Xam668
Manes.03G081400.1.v7.0;pacid=41307519	175	-	0.30505	TATCAAAGCCTCCCATCCAAT	5.20105e-05	NI-NG-NI-NN-NI-HD-NS-NS-NN-NG-HD-NS-HD-NN-HD-HD-HD-NI-NG-NG	TAL20Xam668
Manes.05G014300.1.v7.0;pacid=41336533	123	-	0.305037	AATAAAATGGTCGCAACAAAT	5.20364e-05	NI-NG-NI-NN-NI-HD-NS-NS-NN-NG-HD-NS-HD-NN-HD-HD-HD-NI-NG-NG	TAL20Xam668
Manes.09G035000.1.v7.0;pacid=41311841	181	+	0.304998	TATTGAAACTTCACAGCCCTT	5.21143e-05	NI-NG-NI-NN-NI-HD-NS-NS-NN-NG-HD-NS-HD-NN-HD-HD-HD-NI-NG-NG	TAL20Xam668
Manes.14G054400.1.v7.0;pacid=41332681	25	-	0.304972	TAAAAATCACTCAAACCCAAT	5.2168e-05	NI-NG-NI-NN-NI-HD-NS-NS-NN-NG-HD-NS-HD-NN-HD-HD-HD-NI-NG-NG	TAL20Xam668
Manes.08G070300.1.v7.0;pacid=41314126	365	+	0.304951	CATCCACATTCCTCACCCACT	5.22098e-05	NI-NG-NI-NN-NI-HD-NS-NS-NN-NG-HD-NS-HD-NN-HD-HD-HD-NI-NG-NG	TAL20Xam668
Manes.07G132900.1.v7.0;pacid=41328173	262	+	0.304948	TCCTAACTAGTCTCTTCCATT	5.22156e-05	NI-NG-NI-NN-NI-HD-NS-NS-NN-NG-HD-NS-HD-NN-HD-HD-HD-NI-NG-NG	TAL20Xam668
Manes.03G037400.1.v7.0;pacid=41308229	247	+	0.304945	CACAGACCCACCACCACCCTT	5.22217e-05	NI-NG-NI-NN-NI-HD-NS-NS-NN-NG-HD-NS-HD-NN-HD-HD-HD-NI-NG-NG	TAL20Xam668
Manes.06G095200.1.v7.0;pacid=41304078	117	-	0.304917	AATAGAAAGAACAAATCCATT	5.22776e-05	NI-NG-NI-NN-NI-HD-NS-NS-NN-NG-HD-NS-HD-NN-HD-HD-HD-NI-NG-NG	TAL20Xam668
Manes.01G163200.1.v7.0;pacid=41324910	247	-	0.304887	TATACAACAGTAGCGCTCTCT	5.23383e-05	NI-NG-NI-NN-NI-HD-NS-NS-NN-NG-HD-NS-HD-NN-HD-HD-HD-NI-NG-NG	TAL20Xam668
Manes.01G127800.1.v7.0;pacid=41327371	127	+	0.304816	TGTAGTCAACTCGTCCCCATG	5.24826e-05	NI-NG-NI-NN-NI-HD-NS-NS-NN-NG-HD-NS-HD-NN-HD-HD-HD-NI-NG-NG	TAL20Xam668
Manes.09G028500.1.v7.0;pacid=41310577	206	+	0.304799	TCTCTACATATCCCGCGCCTT	5.25168e-05	NI-NG-NI-NN-NI-HD-NS-NS-NN-NG-HD-NS-HD-NN-HD-HD-HD-NI-NG-NG	TAL20Xam668
Manes.15G032900.1.v7.0;pacid=41306322	80	+	0.304779	GATAATCCAATCTCTCCCTTT	5.25571e-05	NI-NG-NI-NN-NI-HD-NS-NS-NN-NG-HD-NS-HD-NN-HD-HD-HD-NI-NG-NG	TAL20Xam668
Manes.07G105100.1.v7.0;pacid=41327943	128	-	0.30476	TATAGTTGGCTACCTCTCATT	5.25958e-05	NI-NG-NI-NN-NI-HD-NS-NS-NN-NG-HD-NS-HD-NN-HD-HD-HD-NI-NG-NG	TAL20Xam668
Manes.12G014100.1.v7.0;pacid=41322288	188	+	0.304733	TTTAGTTGTATAAAACCCATT	5.26498e-05	NI-NG-NI-NN-NI-HD-NS-NS-NN-NG-HD-NS-HD-NN-HD-HD-HD-NI-NG-NG	TAL20Xam668
Manes.10G046500.2.v7.0;pacid=41322179	12	-	0.304714	TACAAACAAATCTGTCCCCTT	5.26888e-05	NI-NG-NI-NN-NI-HD-NS-NS-NN-NG-HD-NS-HD-NN-HD-HD-HD-NI-NG-NG	TAL20Xam668
Manes.02G217100.1.v7.0;pacid=41339329	185	+	0.304696	TATAAAAGCCTATCCCTCCTT	5.27247e-05	NI-NG-NI-NN-NI-HD-NS-NS-NN-NG-HD-NS-HD-NN-HD-HD-HD-NI-NG-NG	TAL20Xam668
Manes.S032900.1.v7.0;pacid=41327491	62	+	0.304644	TATAGTAAAATACCATCTATT	5.2832e-05	NI-NG-NI-NN-NI-HD-NS-NS-NN-NG-HD-NS-HD-NN-HD-HD-HD-NI-NG-NG	TAL20Xam668
Manes.07G034100.1.v7.0;pacid=41327650	164	+	0.304615	CATAGAAAAGTATTGTCCATA	5.28909e-05	NI-NG-NI-NN-NI-HD-NS-NS-NN-NG-HD-NS-HD-NN-HD-HD-HD-NI-NG-NG	TAL20Xam668
Manes.07G026400.1.v7.0;pacid=41329228	186	+	0.304535	CAAACACCAATCTCCATCATT	5.30532e-05	NI-NG-NI-NN-NI-HD-NS-NS-NN-NG-HD-NS-HD-NN-HD-HD-HD-NI-NG-NG	TAL20Xam668
Manes.09G047500.1.v7.0;pacid=41310715	63	-	0.304531	CCTAGCCCAGCCCAGCCCATA	5.30605e-05	NI-NG-NI-NN-NI-HD-NS-NS-NN-NG-HD-NS-HD-NN-HD-HD-HD-NI-NG-NG	TAL20Xam668
Manes.03G140400.3.v7.0;pacid=41308856	49	+	0.304516	TCTTGAAAAATCCATCCAATT	5.30922e-05	NI-NG-NI-NN-NI-HD-NS-NS-NN-NG-HD-NS-HD-NN-HD-HD-HD-NI-NG-NG	TAL20Xam668
Manes.08G019900.1.v7.0;pacid=41312955	129	+	0.30451	TATGATCATTTCTCGATCATT	5.31036e-05	NI-NG-NI-NN-NI-HD-NS-NS-NN-NG-HD-NS-HD-NN-HD-HD-HD-NI-NG-NG	TAL20Xam668
Manes.14G043200.1.v7.0;pacid=41331315	260	-	0.3045	TACGGACATATCAAAACAATT	5.31256e-05	NI-NG-NI-NN-NI-HD-NS-NS-NN-NG-HD-NS-HD-NN-HD-HD-HD-NI-NG-NG	TAL20Xam668
Manes.04G085200.1.v7.0;pacid=41316146	0	+	0.304433	TATACATGCGTAAAACAAATT	5.32628e-05	NI-NG-NI-NN-NI-HD-NS-NS-NN-NG-HD-NS-HD-NN-HD-HD-HD-NI-NG-NG	TAL20Xam668
Manes.01G067500.1.v7.0;pacid=41326389	244	+	0.304431	AATCAACCCATTACACCAATT	5.32652e-05	NI-NG-NI-NN-NI-HD-NS-NS-NN-NG-HD-NS-HD-NN-HD-HD-HD-NI-NG-NG	TAL20Xam668
Manes.06G112300.1.v7.0;pacid=41302786	206	-	0.304391	TATAGAATAATTTCTCACCTT	5.33482e-05	NI-NG-NI-NN-NI-HD-NS-NS-NN-NG-HD-NS-HD-NN-HD-HD-HD-NI-NG-NG	TAL20Xam668
Manes.06G112300.2.v7.0;pacid=41302787	289	-	0.304391	TATAGAATAATTTCTCACCTT	5.33482e-05	NI-NG-NI-NN-NI-HD-NS-NS-NN-NG-HD-NS-HD-NN-HD-HD-HD-NI-NG-NG	TAL20Xam668
Manes.12G104600.1.v7.0;pacid=41322556	162	+	0.304384	TAATACCTTGTCACTCTCATT	5.33618e-05	NI-NG-NI-NN-NI-HD-NS-NS-NN-NG-HD-NS-HD-NN-HD-HD-HD-NI-NG-NG	TAL20Xam668
Manes.07G089000.1.v7.0;pacid=41327642	273	+	0.30437	TATAAGCCTTTCTCTCTCACT	5.33903e-05	NI-NG-NI-NN-NI-HD-NS-NS-NN-NG-HD-NS-HD-NN-HD-HD-HD-NI-NG-NG	TAL20Xam668
Manes.05G205300.1.v7.0;pacid=41335074	442	+	0.304364	CATTGACATCTCCTTTCCATT	5.34039e-05	NI-NG-NI-NN-NI-HD-NS-NS-NN-NG-HD-NS-HD-NN-HD-HD-HD-NI-NG-NG	TAL20Xam668
Manes.05G205300.2.v7.0;pacid=41335075	442	+	0.304364	CATTGACATCTCCTTTCCATT	5.34039e-05	NI-NG-NI-NN-NI-HD-NS-NS-NN-NG-HD-NS-HD-NN-HD-HD-HD-NI-NG-NG	TAL20Xam668
Manes.15G114000.1.v7.0;pacid=41306418	276	+	0.30435	TTTCCACAGCTCTCACACACT	5.3433e-05	NI-NG-NI-NN-NI-HD-NS-NS-NN-NG-HD-NS-HD-NN-HD-HD-HD-NI-NG-NG	TAL20Xam668
Manes.09G037500.1.v7.0;pacid=41310588	10	+	0.304341	CAAAAACCCCTCTCACCATTT	5.34514e-05	NI-NG-NI-NN-NI-HD-NS-NS-NN-NG-HD-NS-HD-NN-HD-HD-HD-NI-NG-NG	TAL20Xam668
Manes.16G020300.1.v7.0;pacid=41319052	218	+	0.304295	TTAATATCGATCACAACCATT	5.35456e-05	NI-NG-NI-NN-NI-HD-NS-NS-NN-NG-HD-NS-HD-NN-HD-HD-HD-NI-NG-NG	TAL20Xam668
Manes.13G007400.1.v7.0;pacid=41338971	52	-	0.304263	TATAGAAATGTCACCATAATC	5.36115e-05	NI-NG-NI-NN-NI-HD-NS-NS-NN-NG-HD-NS-HD-NN-HD-HD-HD-NI-NG-NG	TAL20Xam668
Manes.02G171100.1.v7.0;pacid=41340161	218	+	0.304259	AATAGTCTTGTATCGCTAATT	5.36205e-05	NI-NG-NI-NN-NI-HD-NS-NS-NN-NG-HD-NS-HD-NN-HD-HD-HD-NI-NG-NG	TAL20Xam668
Manes.13G121200.1.v7.0;pacid=41338517	185	+	0.304249	AATACCCATGTCACTTCCCTT	5.36414e-05	NI-NG-NI-NN-NI-HD-NS-NS-NN-NG-HD-NS-HD-NN-HD-HD-HD-NI-NG-NG	TAL20Xam668
Manes.03G138300.1.v7.0;pacid=41307861	270	+	0.304231	CATTAACGGATAACACCAGTT	5.36778e-05	NI-NG-NI-NN-NI-HD-NS-NS-NN-NG-HD-NS-HD-NN-HD-HD-HD-NI-NG-NG	TAL20Xam668
Manes.11G150700.1.v7.0;pacid=41317171	398	+	0.304216	TCAAGAAACCACACACCCATC	5.37093e-05	NI-NG-NI-NN-NI-HD-NS-NS-NN-NG-HD-NS-HD-NN-HD-HD-HD-NI-NG-NG	TAL20Xam668
Manes.03G179500.1.v7.0;pacid=41309527	272	+	0.304183	CTTACATGAGCCACACCCACT	5.3777e-05	NI-NG-NI-NN-NI-HD-NS-NS-NN-NG-HD-NS-HD-NN-HD-HD-HD-NI-NG-NG	TAL20Xam668
Manes.15G028500.1.v7.0;pacid=41305353	272	+	0.304183	CTTACATGAGCCACACCCACT	5.3777e-05	NI-NG-NI-NN-NI-HD-NS-NS-NN-NG-HD-NS-HD-NN-HD-HD-HD-NI-NG-NG	TAL20Xam668
Manes.04G141300.1.v7.0;pacid=41314892	157	+	0.304182	TTAAACCGAATCACTCTCATT	5.3779e-05	NI-NG-NI-NN-NI-HD-NS-NS-NN-NG-HD-NS-HD-NN-HD-HD-HD-NI-NG-NG	TAL20Xam668
Manes.11G147500.2.v7.0;pacid=41316812	54	-	0.304114	TATTAAATCGTGGTGCCCATT	5.39199e-05	NI-NG-NI-NN-NI-HD-NS-NS-NN-NG-HD-NS-HD-NN-HD-HD-HD-NI-NG-NG	TAL20Xam668
Manes.01G234600.1.v7.0;pacid=41327423	30	+	0.304091	ATTTCAAGGATCAAGCCCATT	5.39678e-05	NI-NG-NI-NN-NI-HD-NS-NS-NN-NG-HD-NS-HD-NN-HD-HD-HD-NI-NG-NG	TAL20Xam668
Manes.10G022900.2.v7.0;pacid=41322183	148	-	0.30409	TATAGACATATCACATTAGTT	5.39701e-05	NI-NG-NI-NN-NI-HD-NS-NS-NN-NG-HD-NS-HD-NN-HD-HD-HD-NI-NG-NG	TAL20Xam668
Manes.10G022900.3.v7.0;pacid=41322184	148	-	0.30409	TATAGACATATCACATTAGTT	5.39701e-05	NI-NG-NI-NN-NI-HD-NS-NS-NN-NG-HD-NS-HD-NN-HD-HD-HD-NI-NG-NG	TAL20Xam668
Manes.01G203100.1.v7.0;pacid=41327090	82	-	0.304089	AAATGACGAGACTCGCCCTTT	5.39708e-05	NI-NG-NI-NN-NI-HD-NS-NS-NN-NG-HD-NS-HD-NN-HD-HD-HD-NI-NG-NG	TAL20Xam668
Manes.S054200.1.v7.0;pacid=41316912	238	+	0.304087	TATAACCGAACCGAACCAAAT	5.39758e-05	NI-NG-NI-NN-NI-HD-NS-NS-NN-NG-HD-NS-HD-NN-HD-HD-HD-NI-NG-NG	TAL20Xam668
Manes.05G053500.2.v7.0;pacid=41335692	104	-	0.30408	TAAATACAACTCCCTTCAATT	5.39904e-05	NI-NG-NI-NN-NI-HD-NS-NS-NN-NG-HD-NS-HD-NN-HD-HD-HD-NI-NG-NG	TAL20Xam668
Manes.18G053700.1.v7.0;pacid=41333402	76	+	0.30401	TATAAAGCCCTCCCACTAATT	5.41351e-05	NI-NG-NI-NN-NI-HD-NS-NS-NN-NG-HD-NS-HD-NN-HD-HD-HD-NI-NG-NG	TAL20Xam668
Manes.11G085100.1.v7.0;pacid=41302688	194	+	0.30401	TCGTCACAAGTCACAACCACT	5.4136e-05	NI-NG-NI-NN-NI-HD-NS-NS-NN-NG-HD-NS-HD-NN-HD-HD-HD-NI-NG-NG	TAL20Xam668
Manes.16G049300.1.v7.0;pacid=41319613	251	+	0.304005	TTTACCCGGCTCCCACCTATC	5.41454e-05	NI-NG-NI-NN-NI-HD-NS-NS-NN-NG-HD-NS-HD-NN-HD-HD-HD-NI-NG-NG	TAL20Xam668
Manes.13G077400.1.v7.0;pacid=41337894	86	+	0.30395	TACACAAACTCCCCACCCAAT	5.42613e-05	NI-NG-NI-NN-NI-HD-NS-NS-NN-NG-HD-NS-HD-NN-HD-HD-HD-NI-NG-NG	TAL20Xam668
Manes.09G076100.1.v7.0;pacid=41312125	148	-	0.303943	TATAAACATTTATCCTCCTTT	5.42748e-05	NI-NG-NI-NN-NI-HD-NS-NS-NN-NG-HD-NS-HD-NN-HD-HD-HD-NI-NG-NG	TAL20Xam668
Manes.06G136900.1.v7.0;pacid=41303724	240	+	0.303939	TATAAACAAAACCCGGCCCAT	5.42843e-05	NI-NG-NI-NN-NI-HD-NS-NS-NN-NG-HD-NS-HD-NN-HD-HD-HD-NI-NG-NG	TAL20Xam668
Manes.15G044700.1.v7.0;pacid=41306019	264	-	0.303926	TCTAAACGGGCCTTTCCCTTT	5.43115e-05	NI-NG-NI-NN-NI-HD-NS-NS-NN-NG-HD-NS-HD-NN-HD-HD-HD-NI-NG-NG	TAL20Xam668
Manes.08G092000.1.v7.0;pacid=41313637	207	-	0.303858	CACCCACTCGTCTCGACCACT	5.44527e-05	NI-NG-NI-NN-NI-HD-NS-NS-NN-NG-HD-NS-HD-NN-HD-HD-HD-NI-NG-NG	TAL20Xam668
Manes.05G013700.1.v7.0;pacid=41336888	221	-	0.30385	TATATACACATATCGCCATCT	5.44707e-05	NI-NG-NI-NN-NI-HD-NS-NS-NN-NG-HD-NS-HD-NN-HD-HD-HD-NI-NG-NG	TAL20Xam668
Manes.02G074200.1.v7.0;pacid=41340763	191	+	0.303844	TATATATATATGACACCCATA	5.44823e-05	NI-NG-NI-NN-NI-HD-NS-NS-NN-NG-HD-NS-HD-NN-HD-HD-HD-NI-NG-NG	TAL20Xam668
Manes.03G097700.1.v7.0;pacid=41308836	238	+	0.303841	TACATAACAATTTCGCCCTTT	5.44888e-05	NI-NG-NI-NN-NI-HD-NS-NS-NN-NG-HD-NS-HD-NN-HD-HD-HD-NI-NG-NG	TAL20Xam668
Manes.08G061700.1.v7.0;pacid=41312460	337	+	0.303831	CATCTGCAGATCTCTCCCACT	5.45091e-05	NI-NG-NI-NN-NI-HD-NS-NS-NN-NG-HD-NS-HD-NN-HD-HD-HD-NI-NG-NG	TAL20Xam668
Manes.12G155800.1.v7.0;pacid=41323405	168	+	0.303798	TATCAAATACTCTCACCAGTT	5.45796e-05	NI-NG-NI-NN-NI-HD-NS-NS-NN-NG-HD-NS-HD-NN-HD-HD-HD-NI-NG-NG	TAL20Xam668
Manes.13G057300.1.v7.0;pacid=41338589	389	+	0.303746	TATCCACTTTCCACTCGCATT	5.4689e-05	NI-NG-NI-NN-NI-HD-NS-NS-NN-NG-HD-NS-HD-NN-HD-HD-HD-NI-NG-NG	TAL20Xam668
Manes.13G057300.2.v7.0;pacid=41338590	405	+	0.303746	TATCCACTTTCCACTCGCATT	5.4689e-05	NI-NG-NI-NN-NI-HD-NS-NS-NN-NG-HD-NS-HD-NN-HD-HD-HD-NI-NG-NG	TAL20Xam668
Manes.13G057300.3.v7.0;pacid=41338591	389	+	0.303746	TATCCACTTTCCACTCGCATT	5.4689e-05	NI-NG-NI-NN-NI-HD-NS-NS-NN-NG-HD-NS-HD-NN-HD-HD-HD-NI-NG-NG	TAL20Xam668
Manes.13G057300.4.v7.0;pacid=41338592	389	+	0.303746	TATCCACTTTCCACTCGCATT	5.4689e-05	NI-NG-NI-NN-NI-HD-NS-NS-NN-NG-HD-NS-HD-NN-HD-HD-HD-NI-NG-NG	TAL20Xam668
Manes.15G119300.1.v7.0;pacid=41305558	263	-	0.303733	TATCGACTTATCTATCAAATT	5.47166e-05	NI-NG-NI-NN-NI-HD-NS-NS-NN-NG-HD-NS-HD-NN-HD-HD-HD-NI-NG-NG	TAL20Xam668
Manes.01G246000.1.v7.0;pacid=41326044	287	-	0.303729	TATAAAAAAATTACCCCCAAA	5.47239e-05	NI-NG-NI-NN-NI-HD-NS-NS-NN-NG-HD-NS-HD-NN-HD-HD-HD-NI-NG-NG	TAL20Xam668
Manes.S084100.1.v7.0;pacid=41328977	218	+	0.303724	TATATAACTATAGCCCCCAAC	5.47339e-05	NI-NG-NI-NN-NI-HD-NS-NS-NN-NG-HD-NS-HD-NN-HD-HD-HD-NI-NG-NG	TAL20Xam668
Manes.14G039600.1.v7.0;pacid=41332665	25	+	0.30371	TTTAAATTTATACCGTCCATT	5.47634e-05	NI-NG-NI-NN-NI-HD-NS-NS-NN-NG-HD-NS-HD-NN-HD-HD-HD-NI-NG-NG	TAL20Xam668
Manes.11G021700.1.v7.0;pacid=41317813	60	-	0.303692	TATAAAAAATCAAAAACCATT	5.48022e-05	NI-NG-NI-NN-NI-HD-NS-NS-NN-NG-HD-NS-HD-NN-HD-HD-HD-NI-NG-NG	TAL20Xam668
Manes.13G043900.1.v7.0;pacid=41337313	197	+	0.303678	TATAGTCGTATAATGCACTTT	5.48324e-05	NI-NG-NI-NN-NI-HD-NS-NS-NN-NG-HD-NS-HD-NN-HD-HD-HD-NI-NG-NG	TAL20Xam668
Manes.04G115000.1.v7.0;pacid=41315374	211	+	0.303676	TATATAAAAGTCTCCCTCTCT	5.48363e-05	NI-NG-NI-NN-NI-HD-NS-NS-NN-NG-HD-NS-HD-NN-HD-HD-HD-NI-NG-NG	TAL20Xam668
Manes.01G135300.1.v7.0;pacid=41327332	137	+	0.303653	TATCGTCTACACCAAACCATT	5.48836e-05	NI-NG-NI-NN-NI-HD-NS-NS-NN-NG-HD-NS-HD-NN-HD-HD-HD-NI-NG-NG	TAL20Xam668
Manes.S000700.2.v7.0;pacid=41334648	170	+	0.303637	TGAAGACCCGTCGCACACAGC	5.49185e-05	NI-NG-NI-NN-NI-HD-NS-NS-NN-NG-HD-NS-HD-NN-HD-HD-HD-NI-NG-NG	TAL20Xam668
Manes.10G009100.1.v7.0;pacid=41322207	157	+	0.303631	TTTAAAATTTTCACGCCATTT	5.49306e-05	NI-NG-NI-NN-NI-HD-NS-NS-NN-NG-HD-NS-HD-NN-HD-HD-HD-NI-NG-NG	TAL20Xam668
Manes.12G034500.1.v7.0;pacid=41322625	142	+	0.303601	CAAAGACCCCCCCAACCAATT	5.49931e-05	NI-NG-NI-NN-NI-HD-NS-NS-NN-NG-HD-NS-HD-NN-HD-HD-HD-NI-NG-NG	TAL20Xam668
Manes.06G079800.1.v7.0;pacid=41302965	147	-	0.303601	TCTAGCTCAAGCGAGCCCATT	5.49949e-05	NI-NG-NI-NN-NI-HD-NS-NS-NN-NG-HD-NS-HD-NN-HD-HD-HD-NI-NG-NG	TAL20Xam668
Manes.09G023500.1.v7.0;pacid=41310710	190	+	0.303552	TATACAAAAGTCTCTCTTTTT	5.50976e-05	NI-NG-NI-NN-NI-HD-NS-NS-NN-NG-HD-NS-HD-NN-HD-HD-HD-NI-NG-NG	TAL20Xam668
Manes.13G018100.1.v7.0;pacid=41338053	336	+	0.303546	TCTCAAAACCTCGAGTCCATT	5.51109e-05	NI-NG-NI-NN-NI-HD-NS-NS-NN-NG-HD-NS-HD-NN-HD-HD-HD-NI-NG-NG	TAL20Xam668
Manes.13G018100.2.v7.0;pacid=41338054	344	+	0.303546	TCTCAAAACCTCGAGTCCATT	5.51109e-05	NI-NG-NI-NN-NI-HD-NS-NS-NN-NG-HD-NS-HD-NN-HD-HD-HD-NI-NG-NG	TAL20Xam668
Manes.18G107500.1.v7.0;pacid=41333812	121	+	0.303495	TATAAACTAATTTAACATATT	5.52181e-05	NI-NG-NI-NN-NI-HD-NS-NS-NN-NG-HD-NS-HD-NN-HD-HD-HD-NI-NG-NG	TAL20Xam668
Manes.08G007600.1.v7.0;pacid=41313663	18	+	0.303494	TAAAATATAGTCTCAACAATT	5.52215e-05	NI-NG-NI-NN-NI-HD-NS-NS-NN-NG-HD-NS-HD-NN-HD-HD-HD-NI-NG-NG	TAL20Xam668
Manes.09G048200.1.v7.0;pacid=41311327	15	-	0.303488	TAATGAGTTGTCTCGCCAATT	5.52328e-05	NI-NG-NI-NN-NI-HD-NS-NS-NN-NG-HD-NS-HD-NN-HD-HD-HD-NI-NG-NG	TAL20Xam668
Manes.17G060700.1.v7.0;pacid=41330396	3	+	0.303478	TATAAACGACACTCATCAATA	5.52553e-05	NI-NG-NI-NN-NI-HD-NS-NS-NN-NG-HD-NS-HD-NN-HD-HD-HD-NI-NG-NG	TAL20Xam668
Manes.13G017800.1.v7.0;pacid=41338980	151	+	0.303456	TCTCCACAGTTCTCACCCAAC	5.53003e-05	NI-NG-NI-NN-NI-HD-NS-NS-NN-NG-HD-NS-HD-NN-HD-HD-HD-NI-NG-NG	TAL20Xam668
Manes.13G142300.1.v7.0;pacid=41338194	220	+	0.303435	TATGCACCAAGCACACAAATT	5.53454e-05	NI-NG-NI-NN-NI-HD-NS-NS-NN-NG-HD-NS-HD-NN-HD-HD-HD-NI-NG-NG	TAL20Xam668
Manes.01G113600.1.v7.0;pacid=41325728	189	+	0.30343	TACAACCTAGTCTTGGCCATT	5.53575e-05	NI-NG-NI-NN-NI-HD-NS-NS-NN-NG-HD-NS-HD-NN-HD-HD-HD-NI-NG-NG	TAL20Xam668
Manes.05G132700.1.v7.0;pacid=41335395	124	-	0.303409	TATCCACCATACCCCCCCAGT	5.5402e-05	NI-NG-NI-NN-NI-HD-NS-NS-NN-NG-HD-NS-HD-NN-HD-HD-HD-NI-NG-NG	TAL20Xam668
Manes.01G069500.1.v7.0;pacid=41327261	112	+	0.303385	CATCTACGAGTTGCGCAGATT	5.54531e-05	NI-NG-NI-NN-NI-HD-NS-NS-NN-NG-HD-NS-HD-NN-HD-HD-HD-NI-NG-NG	TAL20Xam668
Manes.05G114900.1.v7.0;pacid=41336127	95	+	0.303378	TATATAAATTTCCCGGCGATT	5.54678e-05	NI-NG-NI-NN-NI-HD-NS-NS-NN-NG-HD-NS-HD-NN-HD-HD-HD-NI-NG-NG	TAL20Xam668
Manes.05G114900.2.v7.0;pacid=41336128	95	+	0.303378	TATATAAATTTCCCGGCGATT	5.54678e-05	NI-NG-NI-NN-NI-HD-NS-NS-NN-NG-HD-NS-HD-NN-HD-HD-HD-NI-NG-NG	TAL20Xam668
Manes.05G114900.3.v7.0;pacid=41336129	95	+	0.303378	TATATAAATTTCCCGGCGATT	5.54678e-05	NI-NG-NI-NN-NI-HD-NS-NS-NN-NG-HD-NS-HD-NN-HD-HD-HD-NI-NG-NG	TAL20Xam668
Manes.05G114900.4.v7.0;pacid=41336130	95	+	0.303378	TATATAAATTTCCCGGCGATT	5.54678e-05	NI-NG-NI-NN-NI-HD-NS-NS-NN-NG-HD-NS-HD-NN-HD-HD-HD-NI-NG-NG	TAL20Xam668
Manes.15G014500.1.v7.0;pacid=41306294	200	+	0.303374	CAGACACGAGGCGCACCCCAT	5.54753e-05	NI-NG-NI-NN-NI-HD-NS-NS-NN-NG-HD-NS-HD-NN-HD-HD-HD-NI-NG-NG	TAL20Xam668
Manes.02G056800.1.v7.0;pacid=41340408	171	+	0.303366	TTTTCACTAATACCTACCATT	5.54934e-05	NI-NG-NI-NN-NI-HD-NS-NS-NN-NG-HD-NS-HD-NN-HD-HD-HD-NI-NG-NG	TAL20Xam668
Manes.03G107100.1.v7.0;pacid=41308163	158	+	0.303348	TAAAAACAATTTGCACAAATT	5.55322e-05	NI-NG-NI-NN-NI-HD-NS-NS-NN-NG-HD-NS-HD-NN-HD-HD-HD-NI-NG-NG	TAL20Xam668
Manes.04G164900.2.v7.0;pacid=41316482	19	+	0.303294	CATATACGTTTTTCTCCTATT	5.56471e-05	NI-NG-NI-NN-NI-HD-NS-NS-NN-NG-HD-NS-HD-NN-HD-HD-HD-NI-NG-NG	TAL20Xam668
Manes.04G164900.3.v7.0;pacid=41316483	19	+	0.303294	CATATACGTTTTTCTCCTATT	5.56471e-05	NI-NG-NI-NN-NI-HD-NS-NS-NN-NG-HD-NS-HD-NN-HD-HD-HD-NI-NG-NG	TAL20Xam668
Manes.04G164900.4.v7.0;pacid=41316484	19	+	0.303294	CATATACGTTTTTCTCCTATT	5.56471e-05	NI-NG-NI-NN-NI-HD-NS-NS-NN-NG-HD-NS-HD-NN-HD-HD-HD-NI-NG-NG	TAL20Xam668
Manes.04G164900.5.v7.0;pacid=41316485	19	+	0.303294	CATATACGTTTTTCTCCTATT	5.56471e-05	NI-NG-NI-NN-NI-HD-NS-NS-NN-NG-HD-NS-HD-NN-HD-HD-HD-NI-NG-NG	TAL20Xam668
Manes.13G151300.1.v7.0;pacid=41338553	189	+	0.303276	AATGGATATGACCCGCCCATA	5.5685e-05	NI-NG-NI-NN-NI-HD-NS-NS-NN-NG-HD-NS-HD-NN-HD-HD-HD-NI-NG-NG	TAL20Xam668
Manes.05G037400.1.v7.0;pacid=41335895	369	+	0.303239	TATTAAAACATAACAATCATT	5.57637e-05	NI-NG-NI-NN-NI-HD-NS-NS-NN-NG-HD-NS-HD-NN-HD-HD-HD-NI-NG-NG	TAL20Xam668
Manes.05G037400.2.v7.0;pacid=41335896	12	+	0.303239	TATTAAAACATAACAATCATT	5.57637e-05	NI-NG-NI-NN-NI-HD-NS-NS-NN-NG-HD-NS-HD-NN-HD-HD-HD-NI-NG-NG	TAL20Xam668
Manes.05G195700.1.v7.0;pacid=41336899	215	+	0.303207	TGTACACAAGTAACACAACTT	5.58325e-05	NI-NG-NI-NN-NI-HD-NS-NS-NN-NG-HD-NS-HD-NN-HD-HD-HD-NI-NG-NG	TAL20Xam668
Manes.10G075200.1.v7.0;pacid=41320461	206	+	0.303178	CTTAAACCCTAAACCCCCATT	5.58951e-05	NI-NG-NI-NN-NI-HD-NS-NS-NN-NG-HD-NS-HD-NN-HD-HD-HD-NI-NG-NG	TAL20Xam668
Manes.10G075200.2.v7.0;pacid=41320462	206	+	0.303178	CTTAAACCCTAAACCCCCATT	5.58951e-05	NI-NG-NI-NN-NI-HD-NS-NS-NN-NG-HD-NS-HD-NN-HD-HD-HD-NI-NG-NG	TAL20Xam668
Manes.05G151700.1.v7.0;pacid=41335095	136	-	0.303161	TAAAGCCATATCCAGCACAAT	5.59312e-05	NI-NG-NI-NN-NI-HD-NS-NS-NN-NG-HD-NS-HD-NN-HD-HD-HD-NI-NG-NG	TAL20Xam668
Manes.02G042100.1.v7.0;pacid=41340035	299	+	0.303154	CATTCACATTTCTCGTCCCTT	5.59468e-05	NI-NG-NI-NN-NI-HD-NS-NS-NN-NG-HD-NS-HD-NN-HD-HD-HD-NI-NG-NG	TAL20Xam668
Manes.06G087400.1.v7.0;pacid=41303569	22	-	0.303127	TATAGATTGGTCTCCCAGAAT	5.60034e-05	NI-NG-NI-NN-NI-HD-NS-NS-NN-NG-HD-NS-HD-NN-HD-HD-HD-NI-NG-NG	TAL20Xam668
Manes.06G087400.2.v7.0;pacid=41303570	22	-	0.303127	TATAGATTGGTCTCCCAGAAT	5.60034e-05	NI-NG-NI-NN-NI-HD-NS-NS-NN-NG-HD-NS-HD-NN-HD-HD-HD-NI-NG-NG	TAL20Xam668
Manes.03G018700.1.v7.0;pacid=41308924	18	+	0.303115	TACAAACGGGAGCCACCGATT	5.6031e-05	NI-NG-NI-NN-NI-HD-NS-NS-NN-NG-HD-NS-HD-NN-HD-HD-HD-NI-NG-NG	TAL20Xam668
Manes.06G088300.1.v7.0;pacid=41303363	100	-	0.303109	TATAAAAATATCCTGCCTTTT	5.60425e-05	NI-NG-NI-NN-NI-HD-NS-NS-NN-NG-HD-NS-HD-NN-HD-HD-HD-NI-NG-NG	TAL20Xam668
Manes.06G088300.2.v7.0;pacid=41303364	100	-	0.303109	TATAAAAATATCCTGCCTTTT	5.60425e-05	NI-NG-NI-NN-NI-HD-NS-NS-NN-NG-HD-NS-HD-NN-HD-HD-HD-NI-NG-NG	TAL20Xam668
Manes.16G109300.1.v7.0;pacid=41319069	115	+	0.3031	TCTCTACGACCAAAGCCCATT	5.60626e-05	NI-NG-NI-NN-NI-HD-NS-NS-NN-NG-HD-NS-HD-NN-HD-HD-HD-NI-NG-NG	TAL20Xam668
Manes.02G187700.1.v7.0;pacid=41341612	257	+	0.303094	TAAATACCCATCACAACAATG	5.60748e-05	NI-NG-NI-NN-NI-HD-NS-NS-NN-NG-HD-NS-HD-NN-HD-HD-HD-NI-NG-NG	TAL20Xam668
Manes.16G030500.1.v7.0;pacid=41319351	142	+	0.303092	TATAAAAAAAATAAGCTCATT	5.60806e-05	NI-NG-NI-NN-NI-HD-NS-NS-NN-NG-HD-NS-HD-NN-HD-HD-HD-NI-NG-NG	TAL20Xam668
Manes.02G120600.1.v7.0;pacid=41341487	20	+	0.303089	TATAAATTATTCTCTCCAATG	5.60868e-05	NI-NG-NI-NN-NI-HD-NS-NS-NN-NG-HD-NS-HD-NN-HD-HD-HD-NI-NG-NG	TAL20Xam668
Manes.11G021400.2.v7.0;pacid=41318603	222	-	0.303054	TATATAAGCCTCAAATCCATA	5.61619e-05	NI-NG-NI-NN-NI-HD-NS-NS-NN-NG-HD-NS-HD-NN-HD-HD-HD-NI-NG-NG	TAL20Xam668
Manes.08G035700.1.v7.0;pacid=41313918	318	+	0.303053	TCAAAACAGGAAACCCCCACT	5.61628e-05	NI-NG-NI-NN-NI-HD-NS-NS-NN-NG-HD-NS-HD-NN-HD-HD-HD-NI-NG-NG	TAL20Xam668
Manes.16G017700.1.v7.0;pacid=41318611	154	+	0.303037	TATAAAAGAAAATAACCCAGT	5.61991e-05	NI-NG-NI-NN-NI-HD-NS-NS-NN-NG-HD-NS-HD-NN-HD-HD-HD-NI-NG-NG	TAL20Xam668
Manes.18G040800.1.v7.0;pacid=41333505	195	+	0.303015	AATGGACCAATCACCCTTATT	5.62453e-05	NI-NG-NI-NN-NI-HD-NS-NS-NN-NG-HD-NS-HD-NN-HD-HD-HD-NI-NG-NG	TAL20Xam668
Manes.01G235900.1.v7.0;pacid=41327213	144	-	0.303	CATAATCCTCTCGCTAACATT	5.62781e-05	NI-NG-NI-NN-NI-HD-NS-NS-NN-NG-HD-NS-HD-NN-HD-HD-HD-NI-NG-NG	TAL20Xam668
Manes.02G024000.1.v7.0;pacid=41341367	46	+	0.302994	TATTCACATGGCAAAACCATC	5.62909e-05	NI-NG-NI-NN-NI-HD-NS-NS-NN-NG-HD-NS-HD-NN-HD-HD-HD-NI-NG-NG	TAL20Xam668
Manes.08G023700.1.v7.0;pacid=41314149	257	-	0.30293	TATATAAGGATCACCACATTT	5.64295e-05	NI-NG-NI-NN-NI-HD-NS-NS-NN-NG-HD-NS-HD-NN-HD-HD-HD-NI-NG-NG	TAL20Xam668
Manes.04G149200.1.v7.0;pacid=41316500	14	-	0.302927	TATAGACCCATCTATCCATTA	5.64352e-05	NI-NG-NI-NN-NI-HD-NS-NS-NN-NG-HD-NS-HD-NN-HD-HD-HD-NI-NG-NG	TAL20Xam668
Manes.01G110000.1.v7.0;pacid=41326856	127	+	0.302876	TAAAAACAAGTTGCGTACACT	5.65474e-05	NI-NG-NI-NN-NI-HD-NS-NS-NN-NG-HD-NS-HD-NN-HD-HD-HD-NI-NG-NG	TAL20Xam668
Manes.02G165800.1.v7.0;pacid=41341648	102	-	0.302855	ATTAAACTCATCCAGCCCTTT	5.65924e-05	NI-NG-NI-NN-NI-HD-NS-NS-NN-NG-HD-NS-HD-NN-HD-HD-HD-NI-NG-NG	TAL20Xam668
Manes.02G076900.1.v7.0;pacid=41340462	184	-	0.302855	TATATATTGTTCTCACACACT	5.65931e-05	NI-NG-NI-NN-NI-HD-NS-NS-NN-NG-HD-NS-HD-NN-HD-HD-HD-NI-NG-NG	TAL20Xam668
Manes.02G076900.2.v7.0;pacid=41340463	184	-	0.302855	TATATATTGTTCTCACACACT	5.65931e-05	NI-NG-NI-NN-NI-HD-NS-NS-NN-NG-HD-NS-HD-NN-HD-HD-HD-NI-NG-NG	TAL20Xam668
Manes.01G076000.1.v7.0;pacid=41325952	54	-	0.302848	TAGACACGCATCAAACCCTAT	5.66065e-05	NI-NG-NI-NN-NI-HD-NS-NS-NN-NG-HD-NS-HD-NN-HD-HD-HD-NI-NG-NG	TAL20Xam668
Manes.18G074600.1.v7.0;pacid=41333556	63	-	0.302826	TATACTAAAATCACACTGATT	5.66543e-05	NI-NG-NI-NN-NI-HD-NS-NS-NN-NG-HD-NS-HD-NN-HD-HD-HD-NI-NG-NG	TAL20Xam668
Manes.05G160900.1.v7.0;pacid=41336295	366	+	0.302803	TATCGGCAGATGGCTCCCATA	5.67042e-05	NI-NG-NI-NN-NI-HD-NS-NS-NN-NG-HD-NS-HD-NN-HD-HD-HD-NI-NG-NG	TAL20Xam668
Manes.12G125500.1.v7.0;pacid=41324058	250	+	0.302776	TTTAAAAAAAGCTCTCCCCTT	5.67642e-05	NI-NG-NI-NN-NI-HD-NS-NS-NN-NG-HD-NS-HD-NN-HD-HD-HD-NI-NG-NG	TAL20Xam668
Manes.03G168800.2.v7.0;pacid=41307450	232	+	0.302754	TATAAACAATTCAAGAAAAAT	5.68126e-05	NI-NG-NI-NN-NI-HD-NS-NS-NN-NG-HD-NS-HD-NN-HD-HD-HD-NI-NG-NG	TAL20Xam668
Manes.13G035200.1.v7.0;pacid=41338125	242	-	0.302753	TAAAAATGCGCCGCTCCCTTT	5.68138e-05	NI-NG-NI-NN-NI-HD-NS-NS-NN-NG-HD-NS-HD-NN-HD-HD-HD-NI-NG-NG	TAL20Xam668
Manes.11G064000.2.v7.0;pacid=41317318	23	-	0.302701	CATATTCCAAACAATCCCATT	5.6927e-05	NI-NG-NI-NN-NI-HD-NS-NS-NN-NG-HD-NS-HD-NN-HD-HD-HD-NI-NG-NG	TAL20Xam668
Manes.16G066000.1.v7.0;pacid=41319586	255	-	0.302681	TATAAAACCAACCATCCAATT	5.69709e-05	NI-NG-NI-NN-NI-HD-NS-NS-NN-NG-HD-NS-HD-NN-HD-HD-HD-NI-NG-NG	TAL20Xam668
Manes.01G221400.1.v7.0;pacid=41327402	177	-	0.30268	CATAAAATACTCCACCGCATT	5.69739e-05	NI-NG-NI-NN-NI-HD-NS-NS-NN-NG-HD-NS-HD-NN-HD-HD-HD-NI-NG-NG	TAL20Xam668
Manes.01G127000.1.v7.0;pacid=41325299	68	+	0.302657	TATCAATTACTCGTGCTCATT	5.70232e-05	NI-NG-NI-NN-NI-HD-NS-NS-NN-NG-HD-NS-HD-NN-HD-HD-HD-NI-NG-NG	TAL20Xam668
Manes.13G071100.1.v7.0;pacid=41320324	259	+	0.302647	TACTAAAATATCATTCCCATT	5.70462e-05	NI-NG-NI-NN-NI-HD-NS-NS-NN-NG-HD-NS-HD-NN-HD-HD-HD-NI-NG-NG	TAL20Xam668
Manes.15G018600.1.v7.0;pacid=41306901	80	+	0.302646	TATGGACAAGTTGTGCTGATT	5.70465e-05	NI-NG-NI-NN-NI-HD-NS-NS-NN-NG-HD-NS-HD-NN-HD-HD-HD-NI-NG-NG	TAL20Xam668
Manes.01G242200.1.v7.0;pacid=41324860	113	-	0.30262	AATAGACAGATATAACAAATT	5.71041e-05	NI-NG-NI-NN-NI-HD-NS-NS-NN-NG-HD-NS-HD-NN-HD-HD-HD-NI-NG-NG	TAL20Xam668
Manes.01G242200.2.v7.0;pacid=41324861	113	-	0.30262	AATAGACAGATATAACAAATT	5.71041e-05	NI-NG-NI-NN-NI-HD-NS-NS-NN-NG-HD-NS-HD-NN-HD-HD-HD-NI-NG-NG	TAL20Xam668
Manes.15G121100.1.v7.0;pacid=41305152	217	-	0.302614	AACAAAACCCTCCCGCCCTTT	5.71185e-05	NI-NG-NI-NN-NI-HD-NS-NS-NN-NG-HD-NS-HD-NN-HD-HD-HD-NI-NG-NG	TAL20Xam668
Manes.12G014800.1.v7.0;pacid=41324016	273	+	0.302607	TCTGAGCCTCTCACACCCATC	5.71326e-05	NI-NG-NI-NN-NI-HD-NS-NS-NN-NG-HD-NS-HD-NN-HD-HD-HD-NI-NG-NG	TAL20Xam668
Manes.01G215400.1.v7.0;pacid=41324491	257	+	0.302603	TACAGAATCCTCTCCCTCATC	5.71409e-05	NI-NG-NI-NN-NI-HD-NS-NS-NN-NG-HD-NS-HD-NN-HD-HD-HD-NI-NG-NG	TAL20Xam668
Manes.11G097500.1.v7.0;pacid=41317877	223	+	0.302595	TTCAACCGTGGCTCGACCATT	5.71593e-05	NI-NG-NI-NN-NI-HD-NS-NS-NN-NG-HD-NS-HD-NN-HD-HD-HD-NI-NG-NG	TAL20Xam668
Manes.11G097500.2.v7.0;pacid=41317878	223	+	0.302595	TTCAACCGTGGCTCGACCATT	5.71593e-05	NI-NG-NI-NN-NI-HD-NS-NS-NN-NG-HD-NS-HD-NN-HD-HD-HD-NI-NG-NG	TAL20Xam668
Manes.09G067100.1.v7.0;pacid=41311456	260	+	0.302581	TATATAATTTTTACCCCAATT	5.7189e-05	NI-NG-NI-NN-NI-HD-NS-NS-NN-NG-HD-NS-HD-NN-HD-HD-HD-NI-NG-NG	TAL20Xam668
Manes.11G108500.1.v7.0;pacid=41317984	52	-	0.302573	ATTACACAGCTCACGCCCTTC	5.7207e-05	NI-NG-NI-NN-NI-HD-NS-NS-NN-NG-HD-NS-HD-NN-HD-HD-HD-NI-NG-NG	TAL20Xam668
Manes.17G093800.1.v7.0;pacid=41330614	21	-	0.302564	TCTTCACCACCACCACCCATT	5.72282e-05	NI-NG-NI-NN-NI-HD-NS-NS-NN-NG-HD-NS-HD-NN-HD-HD-HD-NI-NG-NG	TAL20Xam668
Manes.05G166900.1.v7.0;pacid=41336330	95	+	0.302555	TATAATAAAATTCAGCCAATT	5.72477e-05	NI-NG-NI-NN-NI-HD-NS-NS-NN-NG-HD-NS-HD-NN-HD-HD-HD-NI-NG-NG	TAL20Xam668
Manes.S069500.1.v7.0;pacid=41317031	261	-	0.302524	CATCCACCACTCCATCCCCTT	5.73155e-05	NI-NG-NI-NN-NI-HD-NS-NS-NN-NG-HD-NS-HD-NN-HD-HD-HD-NI-NG-NG	TAL20Xam668
Manes.15G085200.1.v7.0;pacid=41306857	418	-	0.302523	TATTGATAACTCTCACTAATT	5.73178e-05	NI-NG-NI-NN-NI-HD-NS-NS-NN-NG-HD-NS-HD-NN-HD-HD-HD-NI-NG-NG	TAL20Xam668
Manes.09G067400.1.v7.0;pacid=41310325	257	+	0.302511	TATATATAGATTTAGCTCATT	5.73445e-05	NI-NG-NI-NN-NI-HD-NS-NS-NN-NG-HD-NS-HD-NN-HD-HD-HD-NI-NG-NG	TAL20Xam668
Manes.08G045700.1.v7.0;pacid=41314148	195	+	0.302433	TATAAACCGATTCCACCATTA	5.75147e-05	NI-NG-NI-NN-NI-HD-NS-NS-NN-NG-HD-NS-HD-NN-HD-HD-HD-NI-NG-NG	TAL20Xam668
Manes.16G082000.1.v7.0;pacid=41319256	149	+	0.302387	TTTAGATATCTCATCACCATT	5.76161e-05	NI-NG-NI-NN-NI-HD-NS-NS-NN-NG-HD-NS-HD-NN-HD-HD-HD-NI-NG-NG	TAL20Xam668
Manes.01G183000.1.v7.0;pacid=41325727	129	-	0.302385	TGTAGATCTTTCCCCTCCATT	5.76207e-05	NI-NG-NI-NN-NI-HD-NS-NS-NN-NG-HD-NS-HD-NN-HD-HD-HD-NI-NG-NG	TAL20Xam668
Manes.03G088300.1.v7.0;pacid=41307431	211	+	0.302359	TATTAAAAACCAGCACCCATC	5.76797e-05	NI-NG-NI-NN-NI-HD-NS-NS-NN-NG-HD-NS-HD-NN-HD-HD-HD-NI-NG-NG	TAL20Xam668
Manes.04G015300.1.v7.0;pacid=41314557	305	+	0.30233	TATACCCCTGACTCCATCATT	5.77422e-05	NI-NG-NI-NN-NI-HD-NS-NS-NN-NG-HD-NS-HD-NN-HD-HD-HD-NI-NG-NG	TAL20Xam668
Manes.03G029200.1.v7.0;pacid=41309198	221	-	0.302326	TACAGATTTTTCTCTCTCATT	5.77523e-05	NI-NG-NI-NN-NI-HD-NS-NS-NN-NG-HD-NS-HD-NN-HD-HD-HD-NI-NG-NG	TAL20Xam668
Manes.01G238700.1.v7.0;pacid=41324456	133	+	0.302321	TAGAGACTGGACTTGCCAATA	5.7763e-05	NI-NG-NI-NN-NI-HD-NS-NS-NN-NG-HD-NS-HD-NN-HD-HD-HD-NI-NG-NG	TAL20Xam668
Manes.06G151600.1.v7.0;pacid=41304592	62	-	0.302288	TATGGAAAGGTCAAAAAAATT	5.78365e-05	NI-NG-NI-NN-NI-HD-NS-NS-NN-NG-HD-NS-HD-NN-HD-HD-HD-NI-NG-NG	TAL20Xam668
Manes.06G151600.2.v7.0;pacid=41304593	62	-	0.302288	TATGGAAAGGTCAAAAAAATT	5.78365e-05	NI-NG-NI-NN-NI-HD-NS-NS-NN-NG-HD-NS-HD-NN-HD-HD-HD-NI-NG-NG	TAL20Xam668
Manes.06G151600.3.v7.0;pacid=41304594	62	-	0.302288	TATGGAAAGGTCAAAAAAATT	5.78365e-05	NI-NG-NI-NN-NI-HD-NS-NS-NN-NG-HD-NS-HD-NN-HD-HD-HD-NI-NG-NG	TAL20Xam668
Manes.06G151600.4.v7.0;pacid=41304595	62	-	0.302288	TATGGAAAGGTCAAAAAAATT	5.78365e-05	NI-NG-NI-NN-NI-HD-NS-NS-NN-NG-HD-NS-HD-NN-HD-HD-HD-NI-NG-NG	TAL20Xam668
Manes.01G270900.1.v7.0;pacid=41326231	222	+	0.302285	TATATAACCTTCTTCCCCCTT	5.78424e-05	NI-NG-NI-NN-NI-HD-NS-NS-NN-NG-HD-NS-HD-NN-HD-HD-HD-NI-NG-NG	TAL20Xam668
Manes.09G099000.1.v7.0;pacid=41310854	150	+	0.302285	CCTGGACATATCTAATCCATT	5.78427e-05	NI-NG-NI-NN-NI-HD-NS-NS-NN-NG-HD-NS-HD-NN-HD-HD-HD-NI-NG-NG	TAL20Xam668
Manes.10G107200.1.v7.0;pacid=41321565	68	-	0.302278	CATACACATGTACACACCCTT	5.78573e-05	NI-NG-NI-NN-NI-HD-NS-NS-NN-NG-HD-NS-HD-NN-HD-HD-HD-NI-NG-NG	TAL20Xam668
Manes.18G049100.1.v7.0;pacid=41333487	178	+	0.302275	TATAAATTCCTCTTCCCCATA	5.78637e-05	NI-NG-NI-NN-NI-HD-NS-NS-NN-NG-HD-NS-HD-NN-HD-HD-HD-NI-NG-NG	TAL20Xam668
Manes.09G081800.1.v7.0;pacid=41310743	76	-	0.302243	TATACGACTGTCTCATACATT	5.79355e-05	NI-NG-NI-NN-NI-HD-NS-NS-NN-NG-HD-NS-HD-NN-HD-HD-HD-NI-NG-NG	TAL20Xam668
Manes.03G059100.1.v7.0;pacid=41309479	178	+	0.302242	TACAGACACATTTCTCTCACT	5.79383e-05	NI-NG-NI-NN-NI-HD-NS-NS-NN-NG-HD-NS-HD-NN-HD-HD-HD-NI-NG-NG	TAL20Xam668
Manes.08G112100.1.v7.0;pacid=41314385	118	+	0.302234	TATAAGCTAATCGCATCCGTC	5.79567e-05	NI-NG-NI-NN-NI-HD-NS-NS-NN-NG-HD-NS-HD-NN-HD-HD-HD-NI-NG-NG	TAL20Xam668
Manes.15G065700.2.v7.0;pacid=41305539	411	+	0.30223	CCTAAACATTCCTTACCCATT	5.79654e-05	NI-NG-NI-NN-NI-HD-NS-NS-NN-NG-HD-NS-HD-NN-HD-HD-HD-NI-NG-NG	TAL20Xam668
Manes.05G038400.1.v7.0;pacid=41335128	112	-	0.302195	TACAACAGAGTCTCACACATC	5.80417e-05	NI-NG-NI-NN-NI-HD-NS-NS-NN-NG-HD-NS-HD-NN-HD-HD-HD-NI-NG-NG	TAL20Xam668
Manes.14G046800.1.v7.0;pacid=41332281	63	+	0.302161	TAAACCCTAGTCTAGAGCATT	5.81171e-05	NI-NG-NI-NN-NI-HD-NS-NS-NN-NG-HD-NS-HD-NN-HD-HD-HD-NI-NG-NG	TAL20Xam668
Manes.10G108900.1.v7.0;pacid=41320505	192	-	0.302157	TATACCCTTGTCCCATCCACC	5.81267e-05	NI-NG-NI-NN-NI-HD-NS-NS-NN-NG-HD-NS-HD-NN-HD-HD-HD-NI-NG-NG	TAL20Xam668
Manes.18G105400.1.v7.0;pacid=41334233	162	-	0.302149	TGTGGACCCATCTCGTCCGTT	5.81446e-05	NI-NG-NI-NN-NI-HD-NS-NS-NN-NG-HD-NS-HD-NN-HD-HD-HD-NI-NG-NG	TAL20Xam668
Manes.07G026000.1.v7.0;pacid=41327945	249	-	0.302101	TTCAGATCTGACCCGACCATT	5.8251e-05	NI-NG-NI-NN-NI-HD-NS-NS-NN-NG-HD-NS-HD-NN-HD-HD-HD-NI-NG-NG	TAL20Xam668
Manes.07G026000.2.v7.0;pacid=41327946	249	-	0.302101	TTCAGATCTGACCCGACCATT	5.8251e-05	NI-NG-NI-NN-NI-HD-NS-NS-NN-NG-HD-NS-HD-NN-HD-HD-HD-NI-NG-NG	TAL20Xam668
Manes.17G064800.1.v7.0;pacid=41329370	230	-	0.302097	TCCAGTGCAGTCGAGCCCATT	5.82595e-05	NI-NG-NI-NN-NI-HD-NS-NS-NN-NG-HD-NS-HD-NN-HD-HD-HD-NI-NG-NG	TAL20Xam668
Manes.04G023300.1.v7.0;pacid=41314542	58	+	0.302048	TTTACCCTACACACACCCACT	5.83692e-05	NI-NG-NI-NN-NI-HD-NS-NS-NN-NG-HD-NS-HD-NN-HD-HD-HD-NI-NG-NG	TAL20Xam668
Manes.02G187600.1.v7.0;pacid=41339377	161	+	0.302027	TATAGCACAATAAAAACCAAT	5.84172e-05	NI-NG-NI-NN-NI-HD-NS-NS-NN-NG-HD-NS-HD-NN-HD-HD-HD-NI-NG-NG	TAL20Xam668
Manes.14G063300.1.v7.0;pacid=41331784	46	-	0.302015	TATATACATACACACACCATT	5.8445e-05	NI-NG-NI-NN-NI-HD-NS-NS-NN-NG-HD-NS-HD-NN-HD-HD-HD-NI-NG-NG	TAL20Xam668
Manes.14G063300.2.v7.0;pacid=41331785	46	-	0.302015	TATATACATACACACACCATT	5.8445e-05	NI-NG-NI-NN-NI-HD-NS-NS-NN-NG-HD-NS-HD-NN-HD-HD-HD-NI-NG-NG	TAL20Xam668
Manes.18G058400.1.v7.0;pacid=41333721	222	-	0.302008	CATAAAACCCACTCACGCATT	5.84601e-05	NI-NG-NI-NN-NI-HD-NS-NS-NN-NG-HD-NS-HD-NN-HD-HD-HD-NI-NG-NG	TAL20Xam668
Manes.04G084200.1.v7.0;pacid=41315553	273	+	0.302005	TATCAACCTTGCAAACCAATT	5.84654e-05	NI-NG-NI-NN-NI-HD-NS-NS-NN-NG-HD-NS-HD-NN-HD-HD-HD-NI-NG-NG	TAL20Xam668
Manes.14G126600.1.v7.0;pacid=41331293	227	-	0.301962	TATACCCAATTCAATACCAAT	5.85616e-05	NI-NG-NI-NN-NI-HD-NS-NS-NN-NG-HD-NS-HD-NN-HD-HD-HD-NI-NG-NG	TAL20Xam668
Manes.03G161600.1.v7.0;pacid=41308935	272	-	0.301941	AATATACAAGTCTCACTCACA	5.861e-05	NI-NG-NI-NN-NI-HD-NS-NS-NN-NG-HD-NS-HD-NN-HD-HD-HD-NI-NG-NG	TAL20Xam668
Manes.06G142100.1.v7.0;pacid=41303496	195	+	0.30189	CATACACATTACATACCCATC	5.87243e-05	NI-NG-NI-NN-NI-HD-NS-NS-NN-NG-HD-NS-HD-NN-HD-HD-HD-NI-NG-NG	TAL20Xam668
Manes.10G095700.2.v7.0;pacid=41321154	410	+	0.301878	CATCTACTATGTGCGCCCATT	5.87516e-05	NI-NG-NI-NN-NI-HD-NS-NS-NN-NG-HD-NS-HD-NN-HD-HD-HD-NI-NG-NG	TAL20Xam668
Manes.13G073700.1.v7.0;pacid=41338020	10	+	0.301877	TATAGGACATTCACGCAAATA	5.87538e-05	NI-NG-NI-NN-NI-HD-NS-NS-NN-NG-HD-NS-HD-NN-HD-HD-HD-NI-NG-NG	TAL20Xam668
Manes.10G103900.1.v7.0;pacid=41321403	216	+	0.301874	AAAAGCCCAAACGCGCCCTTT	5.87611e-05	NI-NG-NI-NN-NI-HD-NS-NS-NN-NG-HD-NS-HD-NN-HD-HD-HD-NI-NG-NG	TAL20Xam668
Manes.10G103900.2.v7.0;pacid=41321404	216	+	0.301874	AAAAGCCCAAACGCGCCCTTT	5.87611e-05	NI-NG-NI-NN-NI-HD-NS-NS-NN-NG-HD-NS-HD-NN-HD-HD-HD-NI-NG-NG	TAL20Xam668
Manes.07G110100.1.v7.0;pacid=41327860	159	+	0.301856	TCTAATCCCTTCTCAACCAAT	5.88006e-05	NI-NG-NI-NN-NI-HD-NS-NS-NN-NG-HD-NS-HD-NN-HD-HD-HD-NI-NG-NG	TAL20Xam668
Manes.07G110100.2.v7.0;pacid=41327861	159	+	0.301856	TCTAATCCCTTCTCAACCAAT	5.88006e-05	NI-NG-NI-NN-NI-HD-NS-NS-NN-NG-HD-NS-HD-NN-HD-HD-HD-NI-NG-NG	TAL20Xam668
Manes.01G055700.1.v7.0;pacid=41324234	225	+	0.301848	TATAAATAAATCCATCCTCTT	5.88194e-05	NI-NG-NI-NN-NI-HD-NS-NS-NN-NG-HD-NS-HD-NN-HD-HD-HD-NI-NG-NG	TAL20Xam668
Manes.18G099500.1.v7.0;pacid=41334068	176	-	0.301781	AGTAGAAAAATAGCTACCATT	5.89706e-05	NI-NG-NI-NN-NI-HD-NS-NS-NN-NG-HD-NS-HD-NN-HD-HD-HD-NI-NG-NG	TAL20Xam668
Manes.18G074000.1.v7.0;pacid=41334194	148	+	0.301775	TATTATCGATTAAAGCACATT	5.89823e-05	NI-NG-NI-NN-NI-HD-NS-NS-NN-NG-HD-NS-HD-NN-HD-HD-HD-NI-NG-NG	TAL20Xam668
Manes.03G181200.1.v7.0;pacid=41308897	361	+	0.301693	TTCATACAAACCTCACCCATC	5.91688e-05	NI-NG-NI-NN-NI-HD-NS-NS-NN-NG-HD-NS-HD-NN-HD-HD-HD-NI-NG-NG	TAL20Xam668
Manes.12G146300.1.v7.0;pacid=41322576	280	-	0.301671	TAAAGCCCACTCTCACTCTTT	5.92194e-05	NI-NG-NI-NN-NI-HD-NS-NS-NN-NG-HD-NS-HD-NN-HD-HD-HD-NI-NG-NG	TAL20Xam668
Manes.12G146300.2.v7.0;pacid=41322577	280	-	0.301671	TAAAGCCCACTCTCACTCTTT	5.92194e-05	NI-NG-NI-NN-NI-HD-NS-NS-NN-NG-HD-NS-HD-NN-HD-HD-HD-NI-NG-NG	TAL20Xam668
Manes.16G114100.1.v7.0;pacid=41319520	53	+	0.301631	TTTAAACAAGCTTCTTCCATT	5.93097e-05	NI-NG-NI-NN-NI-HD-NS-NS-NN-NG-HD-NS-HD-NN-HD-HD-HD-NI-NG-NG	TAL20Xam668
Manes.08G014000.1.v7.0;pacid=41314363	207	+	0.301617	TATATTCCAATCTAGCCTGTT	5.93421e-05	NI-NG-NI-NN-NI-HD-NS-NS-NN-NG-HD-NS-HD-NN-HD-HD-HD-NI-NG-NG	TAL20Xam668
Manes.11G012900.1.v7.0;pacid=41316781	267	+	0.30161	TCTACATCAGTCATCCCCATA	5.93567e-05	NI-NG-NI-NN-NI-HD-NS-NS-NN-NG-HD-NS-HD-NN-HD-HD-HD-NI-NG-NG	TAL20Xam668
Manes.01G228400.1.v7.0;pacid=41327023	172	+	0.301587	TATGGACGTGGCAACCACCTT	5.94102e-05	NI-NG-NI-NN-NI-HD-NS-NS-NN-NG-HD-NS-HD-NN-HD-HD-HD-NI-NG-NG	TAL20Xam668
Manes.09G030700.1.v7.0;pacid=41311014	38	+	0.301525	TAAAACCGTTTCCTAACCATT	5.95511e-05	NI-NG-NI-NN-NI-HD-NS-NS-NN-NG-HD-NS-HD-NN-HD-HD-HD-NI-NG-NG	TAL20Xam668
Manes.14G075900.1.v7.0;pacid=41330948	273	-	0.301491	TACCTACAAATCCAATCCATT	5.96289e-05	NI-NG-NI-NN-NI-HD-NS-NS-NN-NG-HD-NS-HD-NN-HD-HD-HD-NI-NG-NG	TAL20Xam668
Manes.11G040700.1.v7.0;pacid=41317286	206	+	0.301463	TATACACATGTAAAACATATA	5.96915e-05	NI-NG-NI-NN-NI-HD-NS-NS-NN-NG-HD-NS-HD-NN-HD-HD-HD-NI-NG-NG	TAL20Xam668
Manes.08G146000.1.v7.0;pacid=41313069	247	-	0.301445	CATAGAATTTTTTCACTCATT	5.97327e-05	NI-NG-NI-NN-NI-HD-NS-NS-NN-NG-HD-NS-HD-NN-HD-HD-HD-NI-NG-NG	TAL20Xam668
Manes.04G133600.1.v7.0;pacid=41315802	41	+	0.301399	TATACATGTGTAACTTTCATT	5.98381e-05	NI-NG-NI-NN-NI-HD-NS-NS-NN-NG-HD-NS-HD-NN-HD-HD-HD-NI-NG-NG	TAL20Xam668
Manes.04G133600.2.v7.0;pacid=41315803	187	+	0.301399	TATACATGTGTAACTTTCATT	5.98381e-05	NI-NG-NI-NN-NI-HD-NS-NS-NN-NG-HD-NS-HD-NN-HD-HD-HD-NI-NG-NG	TAL20Xam668
Manes.03G118200.1.v7.0;pacid=41309747	249	+	0.301393	CAAGTACAACTCCCACCCTTT	5.98519e-05	NI-NG-NI-NN-NI-HD-NS-NS-NN-NG-HD-NS-HD-NN-HD-HD-HD-NI-NG-NG	TAL20Xam668
Manes.18G050000.1.v7.0;pacid=41333440	8	+	0.301393	TATTTCCAACTTCCAACCATT	5.98519e-05	NI-NG-NI-NN-NI-HD-NS-NS-NN-NG-HD-NS-HD-NN-HD-HD-HD-NI-NG-NG	TAL20Xam668
Manes.14G148200.1.v7.0;pacid=41332260	255	+	0.301371	TACTAACAACACACTCCAATT	5.99027e-05	NI-NG-NI-NN-NI-HD-NS-NS-NN-NG-HD-NS-HD-NN-HD-HD-HD-NI-NG-NG	TAL20Xam668
Manes.14G012500.1.v7.0;pacid=41331932	322	+	0.301335	TACACCCAAATCCCTCCACTT	5.99846e-05	NI-NG-NI-NN-NI-HD-NS-NS-NN-NG-HD-NS-HD-NN-HD-HD-HD-NI-NG-NG	TAL20Xam668
Manes.11G075000.1.v7.0;pacid=41317351	335	+	0.301294	CAAAAATATCTCCCACTCATT	6.00793e-05	NI-NG-NI-NN-NI-HD-NS-NS-NN-NG-HD-NS-HD-NN-HD-HD-HD-NI-NG-NG	TAL20Xam668
Manes.12G023800.1.v7.0;pacid=41324040	237	+	0.301286	TCCAAACAAGGCACACCAATA	6.00981e-05	NI-NG-NI-NN-NI-HD-NS-NS-NN-NG-HD-NS-HD-NN-HD-HD-HD-NI-NG-NG	TAL20Xam668
Manes.12G023800.2.v7.0;pacid=41324041	237	+	0.301286	TCCAAACAAGGCACACCAATA	6.00981e-05	NI-NG-NI-NN-NI-HD-NS-NS-NN-NG-HD-NS-HD-NN-HD-HD-HD-NI-NG-NG	TAL20Xam668
Manes.12G023800.3.v7.0;pacid=41324042	237	+	0.301286	TCCAAACAAGGCACACCAATA	6.00981e-05	NI-NG-NI-NN-NI-HD-NS-NS-NN-NG-HD-NS-HD-NN-HD-HD-HD-NI-NG-NG	TAL20Xam668
Manes.04G060600.1.v7.0;pacid=41314918	266	+	0.301285	TATACCAGTACCGAGCTCATT	6.00997e-05	NI-NG-NI-NN-NI-HD-NS-NS-NN-NG-HD-NS-HD-NN-HD-HD-HD-NI-NG-NG	TAL20Xam668
Manes.10G147300.1.v7.0;pacid=41321810	225	+	0.301234	TTCAGAACTATCACGTCCCTT	6.02176e-05	NI-NG-NI-NN-NI-HD-NS-NS-NN-NG-HD-NS-HD-NN-HD-HD-HD-NI-NG-NG	TAL20Xam668
Manes.17G069100.1.v7.0;pacid=41329509	274	+	0.301222	TAAAGCCCAGTCCATCCTATA	6.02443e-05	NI-NG-NI-NN-NI-HD-NS-NS-NN-NG-HD-NS-HD-NN-HD-HD-HD-NI-NG-NG	TAL20Xam668
Manes.18G009900.2.v7.0;pacid=41333406	174	+	0.301159	TGTAGAAACTTCACGGCGATT	6.03888e-05	NI-NG-NI-NN-NI-HD-NS-NS-NN-NG-HD-NS-HD-NN-HD-HD-HD-NI-NG-NG	TAL20Xam668
Manes.02G039200.1.v7.0;pacid=41339887	154	+	0.301123	CAAAAACCCCTAAAACCCCTT	6.04722e-05	NI-NG-NI-NN-NI-HD-NS-NS-NN-NG-HD-NS-HD-NN-HD-HD-HD-NI-NG-NG	TAL20Xam668
Manes.16G025900.1.v7.0;pacid=41320212	77	+	0.301105	TGTCCACGTGTCCCTCCCTTC	6.0515e-05	NI-NG-NI-NN-NI-HD-NS-NS-NN-NG-HD-NS-HD-NN-HD-HD-HD-NI-NG-NG	TAL20Xam668
Manes.05G202600.2.v7.0;pacid=41334986	311	+	0.301104	TCTGCTCTCTTCTCCCCCATT	6.05157e-05	NI-NG-NI-NN-NI-HD-NS-NS-NN-NG-HD-NS-HD-NN-HD-HD-HD-NI-NG-NG	TAL20Xam668
Manes.03G072600.1.v7.0;pacid=41309624	193	+	0.301095	TTTATAAGCCTCACACCCTCT	6.0537e-05	NI-NG-NI-NN-NI-HD-NS-NS-NN-NG-HD-NS-HD-NN-HD-HD-HD-NI-NG-NG	TAL20Xam668
Manes.09G161900.1.v7.0;pacid=41311445	57	+	0.301087	CAAAGAACCGTCTCTCGCACT	6.05563e-05	NI-NG-NI-NN-NI-HD-NS-NS-NN-NG-HD-NS-HD-NN-HD-HD-HD-NI-NG-NG	TAL20Xam668
Manes.09G077400.1.v7.0;pacid=41312195	27	+	0.301067	TTTAAATTTGGTGCACCCATT	6.06018e-05	NI-NG-NI-NN-NI-HD-NS-NS-NN-NG-HD-NS-HD-NN-HD-HD-HD-NI-NG-NG	TAL20Xam668
Manes.15G134600.1.v7.0;pacid=41305396	118	-	0.301067	TGCAGCCGACTCCCTCCCATG	6.06031e-05	NI-NG-NI-NN-NI-HD-NS-NS-NN-NG-HD-NS-HD-NN-HD-HD-HD-NI-NG-NG	TAL20Xam668
Manes.05G121800.1.v7.0;pacid=41337136	3	-	0.301061	CATGGAACAGTTGCCCCCAGT	6.06171e-05	NI-NG-NI-NN-NI-HD-NS-NS-NN-NG-HD-NS-HD-NN-HD-HD-HD-NI-NG-NG	TAL20Xam668
Manes.06G142100.1.v7.0;pacid=41303496	90	-	0.301052	TACACATGGGTCACCTCCCTT	6.06382e-05	NI-NG-NI-NN-NI-HD-NS-NS-NN-NG-HD-NS-HD-NN-HD-HD-HD-NI-NG-NG	TAL20Xam668
Manes.S011300.1.v7.0;pacid=41332942	290	+	0.301043	TATAGACATCTATCTCCATGT	6.06587e-05	NI-NG-NI-NN-NI-HD-NS-NS-NN-NG-HD-NS-HD-NN-HD-HD-HD-NI-NG-NG	TAL20Xam668
Manes.05G075000.1.v7.0;pacid=41335168	8	-	0.301034	TTTAAACTTGTCCCTGCAATT	6.06797e-05	NI-NG-NI-NN-NI-HD-NS-NS-NN-NG-HD-NS-HD-NN-HD-HD-HD-NI-NG-NG	TAL20Xam668
Manes.10G023400.1.v7.0;pacid=41321124	121	-	0.301028	TATACAAAAATCAAAAACATC	6.06923e-05	NI-NG-NI-NN-NI-HD-NS-NS-NN-NG-HD-NS-HD-NN-HD-HD-HD-NI-NG-NG	TAL20Xam668
Manes.10G023400.2.v7.0;pacid=41321125	135	-	0.301028	TATACAAAAATCAAAAACATC	6.06923e-05	NI-NG-NI-NN-NI-HD-NS-NS-NN-NG-HD-NS-HD-NN-HD-HD-HD-NI-NG-NG	TAL20Xam668
Manes.07G087600.1.v7.0;pacid=41328336	220	-	0.300994	TATTAACAAGTCAATACCACA	6.07706e-05	NI-NG-NI-NN-NI-HD-NS-NS-NN-NG-HD-NS-HD-NN-HD-HD-HD-NI-NG-NG	TAL20Xam668
Manes.12G061600.1.v7.0;pacid=41322525	179	-	0.300979	TATAAACAAACCCCACTCAGA	6.08062e-05	NI-NG-NI-NN-NI-HD-NS-NS-NN-NG-HD-NS-HD-NN-HD-HD-HD-NI-NG-NG	TAL20Xam668
Manes.07G003900.1.v7.0;pacid=41328958	266	+	0.300971	TGTAGACAGCTTAAGCATATT	6.08244e-05	NI-NG-NI-NN-NI-HD-NS-NS-NN-NG-HD-NS-HD-NN-HD-HD-HD-NI-NG-NG	TAL20Xam668
Manes.01G174600.1.v7.0;pacid=41326631	159	+	0.300961	TACTTCCTGGTCCAGCCCACT	6.08475e-05	NI-NG-NI-NN-NI-HD-NS-NS-NN-NG-HD-NS-HD-NN-HD-HD-HD-NI-NG-NG	TAL20Xam668
Manes.08G081900.1.v7.0;pacid=41312643	54	-	0.30094	TTTGATAAAGTCGCACCCACT	6.08978e-05	NI-NG-NI-NN-NI-HD-NS-NS-NN-NG-HD-NS-HD-NN-HD-HD-HD-NI-NG-NG	TAL20Xam668
Manes.06G136400.1.v7.0;pacid=41303387	16	+	0.300926	TATAAACCCATAATTCCAATA	6.09299e-05	NI-NG-NI-NN-NI-HD-NS-NS-NN-NG-HD-NS-HD-NN-HD-HD-HD-NI-NG-NG	TAL20Xam668
Manes.11G165000.1.v7.0;pacid=41317000	32	+	0.300922	CTGAAACTAGTCAAATCCATT	6.09386e-05	NI-NG-NI-NN-NI-HD-NS-NS-NN-NG-HD-NS-HD-NN-HD-HD-HD-NI-NG-NG	TAL20Xam668
Manes.18G100800.1.v7.0;pacid=41334503	236	+	0.300912	TATACATAAATAAAGCAAATT	6.09618e-05	NI-NG-NI-NN-NI-HD-NS-NS-NN-NG-HD-NS-HD-NN-HD-HD-HD-NI-NG-NG	TAL20Xam668
Manes.09G087300.1.v7.0;pacid=41312024	121	+	0.300908	TATCAAATTGAACCACCAATT	6.09716e-05	NI-NG-NI-NN-NI-HD-NS-NS-NN-NG-HD-NS-HD-NN-HD-HD-HD-NI-NG-NG	TAL20Xam668
Manes.03G058800.1.v7.0;pacid=41308657	39	-	0.300887	TCAAGTCTTTTCACACACATT	6.1021e-05	NI-NG-NI-NN-NI-HD-NS-NS-NN-NG-HD-NS-HD-NN-HD-HD-HD-NI-NG-NG	TAL20Xam668
Manes.06G135100.1.v7.0;pacid=41303785	235	-	0.300885	TATATACACGTCATTACAATA	6.10254e-05	NI-NG-NI-NN-NI-HD-NS-NS-NN-NG-HD-NS-HD-NN-HD-HD-HD-NI-NG-NG	TAL20Xam668
Manes.01G194500.1.v7.0;pacid=41325150	296	+	0.300877	CATAAAAAAGCTGCCCCCTTT	6.10434e-05	NI-NG-NI-NN-NI-HD-NS-NS-NN-NG-HD-NS-HD-NN-HD-HD-HD-NI-NG-NG	TAL20Xam668
Manes.01G194500.2.v7.0;pacid=41325151	261	+	0.300877	CATAAAAAAGCTGCCCCCTTT	6.10434e-05	NI-NG-NI-NN-NI-HD-NS-NS-NN-NG-HD-NS-HD-NN-HD-HD-HD-NI-NG-NG	TAL20Xam668
Manes.04G012400.1.v7.0;pacid=41314528	478	+	0.300877	TATAAACGACTCAGCTCCTTT	6.10441e-05	NI-NG-NI-NN-NI-HD-NS-NS-NN-NG-HD-NS-HD-NN-HD-HD-HD-NI-NG-NG	TAL20Xam668
Manes.06G162800.1.v7.0;pacid=41304266	234	+	0.30086	TACACACATTTCTCCCCCGAT	6.10845e-05	NI-NG-NI-NN-NI-HD-NS-NS-NN-NG-HD-NS-HD-NN-HD-HD-HD-NI-NG-NG	TAL20Xam668
Manes.02G089700.1.v7.0;pacid=41339528	84	+	0.300842	TATAAAAGGGCCAAAAACATC	6.11256e-05	NI-NG-NI-NN-NI-HD-NS-NS-NN-NG-HD-NS-HD-NN-HD-HD-HD-NI-NG-NG	TAL20Xam668
Manes.15G190300.1.v7.0;pacid=41305700	187	-	0.300834	TATAAAACGAGCTATCCAATT	6.11441e-05	NI-NG-NI-NN-NI-HD-NS-NS-NN-NG-HD-NS-HD-NN-HD-HD-HD-NI-NG-NG	TAL20Xam668
Manes.15G190300.2.v7.0;pacid=41305701	187	-	0.300834	TATAAAACGAGCTATCCAATT	6.11441e-05	NI-NG-NI-NN-NI-HD-NS-NS-NN-NG-HD-NS-HD-NN-HD-HD-HD-NI-NG-NG	TAL20Xam668
Manes.12G032600.1.v7.0;pacid=41322241	253	+	0.300784	TATAAACCAACATCTTCCACT	6.12615e-05	NI-NG-NI-NN-NI-HD-NS-NS-NN-NG-HD-NS-HD-NN-HD-HD-HD-NI-NG-NG	TAL20Xam668
Manes.08G089100.1.v7.0;pacid=41313327	99	+	0.300774	CAGCGACAGATCTACCCCATA	6.12856e-05	NI-NG-NI-NN-NI-HD-NS-NS-NN-NG-HD-NS-HD-NN-HD-HD-HD-NI-NG-NG	TAL20Xam668
Manes.18G103400.1.v7.0;pacid=41333770	161	+	0.300745	TTTACCATCGTCCTTCCCATT	6.13537e-05	NI-NG-NI-NN-NI-HD-NS-NS-NN-NG-HD-NS-HD-NN-HD-HD-HD-NI-NG-NG	TAL20Xam668
Manes.04G058700.1.v7.0;pacid=41315536	62	+	0.30072	AATAAATCAAACCCACCCAAT	6.14113e-05	NI-NG-NI-NN-NI-HD-NS-NS-NN-NG-HD-NS-HD-NN-HD-HD-HD-NI-NG-NG	TAL20Xam668
Manes.15G012400.1.v7.0;pacid=41306397	240	+	0.300718	TATACACCAAACATACCCCTG	6.14149e-05	NI-NG-NI-NN-NI-HD-NS-NS-NN-NG-HD-NS-HD-NN-HD-HD-HD-NI-NG-NG	TAL20Xam668
Manes.15G185500.1.v7.0;pacid=41305649	254	+	0.300681	CACACAAAAGAAACAACCATT	6.15031e-05	NI-NG-NI-NN-NI-HD-NS-NS-NN-NG-HD-NS-HD-NN-HD-HD-HD-NI-NG-NG	TAL20Xam668
Manes.15G185500.2.v7.0;pacid=41305650	254	+	0.300681	CACACAAAAGAAACAACCATT	6.15031e-05	NI-NG-NI-NN-NI-HD-NS-NS-NN-NG-HD-NS-HD-NN-HD-HD-HD-NI-NG-NG	TAL20Xam668
Manes.15G180400.1.v7.0;pacid=41306328	71	-	0.300645	TATAGACATGACATAACAAGT	6.1587e-05	NI-NG-NI-NN-NI-HD-NS-NS-NN-NG-HD-NS-HD-NN-HD-HD-HD-NI-NG-NG	TAL20Xam668
Manes.12G069300.1.v7.0;pacid=41322879	96	+	0.300637	TAAAGGACCCACAAACCCATT	6.1607e-05	NI-NG-NI-NN-NI-HD-NS-NS-NN-NG-HD-NS-HD-NN-HD-HD-HD-NI-NG-NG	TAL20Xam668
Manes.11G003400.1.v7.0;pacid=41316648	147	-	0.300627	AATACACAACACGAATCCATT	6.16288e-05	NI-NG-NI-NN-NI-HD-NS-NS-NN-NG-HD-NS-HD-NN-HD-HD-HD-NI-NG-NG	TAL20Xam668
Manes.18G042400.1.v7.0;pacid=41333077	230	+	0.300599	TACCCACCAAAACAGCCCATT	6.16945e-05	NI-NG-NI-NN-NI-HD-NS-NS-NN-NG-HD-NS-HD-NN-HD-HD-HD-NI-NG-NG	TAL20Xam668
Manes.02G006000.1.v7.0;pacid=41340388	84	+	0.300598	CATATTCCTTTCTCTTCCATT	6.16968e-05	NI-NG-NI-NN-NI-HD-NS-NS-NN-NG-HD-NS-HD-NN-HD-HD-HD-NI-NG-NG	TAL20Xam668
Manes.S093400.1.v7.0;pacid=41308703	17	+	0.300566	CATAAACTTTTCAACCCCAAA	6.17728e-05	NI-NG-NI-NN-NI-HD-NS-NS-NN-NG-HD-NS-HD-NN-HD-HD-HD-NI-NG-NG	TAL20Xam668
Manes.08G030700.1.v7.0;pacid=41313176	263	-	0.300559	TATAAAAAAGACAACCCCAAC	6.17887e-05	NI-NG-NI-NN-NI-HD-NS-NS-NN-NG-HD-NS-HD-NN-HD-HD-HD-NI-NG-NG	TAL20Xam668
Manes.01G193600.1.v7.0;pacid=41327288	148	+	0.300514	AATAAAAAATTCTCATCCCTT	6.18966e-05	NI-NG-NI-NN-NI-HD-NS-NS-NN-NG-HD-NS-HD-NN-HD-HD-HD-NI-NG-NG	TAL20Xam668
Manes.05G100100.1.v7.0;pacid=41337013	278	+	0.300497	TATAATCCCACCACCCCCACA	6.19358e-05	NI-NG-NI-NN-NI-HD-NS-NS-NN-NG-HD-NS-HD-NN-HD-HD-HD-NI-NG-NG	TAL20Xam668
Manes.14G010600.1.v7.0;pacid=41330978	253	-	0.300495	TAATGACGGGTCCCAAGGATT	6.19411e-05	NI-NG-NI-NN-NI-HD-NS-NS-NN-NG-HD-NS-HD-NN-HD-HD-HD-NI-NG-NG	TAL20Xam668
Manes.12G003600.1.v7.0;pacid=41323890	216	+	0.300489	CATAAATGTTTAAAGCCCAAT	6.19553e-05	NI-NG-NI-NN-NI-HD-NS-NS-NN-NG-HD-NS-HD-NN-HD-HD-HD-NI-NG-NG	TAL20Xam668
Manes.10G009900.1.v7.0;pacid=41321590	42	-	0.300481	AATAAAAGCCTCTCACCAATA	6.19749e-05	NI-NG-NI-NN-NI-HD-NS-NS-NN-NG-HD-NS-HD-NN-HD-HD-HD-NI-NG-NG	TAL20Xam668
Manes.09G171500.1.v7.0;pacid=41310933	211	+	0.300474	TATAACCGGGTTCAACCCGTC	6.19899e-05	NI-NG-NI-NN-NI-HD-NS-NS-NN-NG-HD-NS-HD-NN-HD-HD-HD-NI-NG-NG	TAL20Xam668
Manes.02G047500.1.v7.0;pacid=41341599	115	+	0.300449	CGTAAACGTTGCAATCCCATT	6.20497e-05	NI-NG-NI-NN-NI-HD-NS-NS-NN-NG-HD-NS-HD-NN-HD-HD-HD-NI-NG-NG	TAL20Xam668
Manes.02G047500.2.v7.0;pacid=41341600	115	+	0.300449	CGTAAACGTTGCAATCCCATT	6.20497e-05	NI-NG-NI-NN-NI-HD-NS-NS-NN-NG-HD-NS-HD-NN-HD-HD-HD-NI-NG-NG	TAL20Xam668
Manes.01G107100.1.v7.0;pacid=41324863	300	+	0.300445	TTTAAACATTTCTAAACCGTT	6.20586e-05	NI-NG-NI-NN-NI-HD-NS-NS-NN-NG-HD-NS-HD-NN-HD-HD-HD-NI-NG-NG	TAL20Xam668
Manes.12G116400.1.v7.0;pacid=41322795	242	-	0.300442	CATAGACTCGGACCACAGATT	6.20659e-05	NI-NG-NI-NN-NI-HD-NS-NS-NN-NG-HD-NS-HD-NN-HD-HD-HD-NI-NG-NG	TAL20Xam668
Manes.12G116400.2.v7.0;pacid=41322796	242	-	0.300442	CATAGACTCGGACCACAGATT	6.20659e-05	NI-NG-NI-NN-NI-HD-NS-NS-NN-NG-HD-NS-HD-NN-HD-HD-HD-NI-NG-NG	TAL20Xam668
Manes.09G061600.1.v7.0;pacid=41327562	149	+	0.300419	TATTCAACCATCTCTGCCATT	6.21206e-05	NI-NG-NI-NN-NI-HD-NS-NS-NN-NG-HD-NS-HD-NN-HD-HD-HD-NI-NG-NG	TAL20Xam668
Manes.05G139400.1.v7.0;pacid=41336046	221	-	0.300394	TATATACAGATCCTTTCCTTT	6.2181e-05	NI-NG-NI-NN-NI-HD-NS-NS-NN-NG-HD-NS-HD-NN-HD-HD-HD-NI-NG-NG	TAL20Xam668
Manes.05G139600.1.v7.0;pacid=41335602	221	-	0.300394	TATATACAGATCCTTTCCTTT	6.2181e-05	NI-NG-NI-NN-NI-HD-NS-NS-NN-NG-HD-NS-HD-NN-HD-HD-HD-NI-NG-NG	TAL20Xam668
Manes.12G140700.1.v7.0;pacid=41322806	183	+	0.30037	TAAAGAAAGAAAATCCCCATT	6.22363e-05	NI-NG-NI-NN-NI-HD-NS-NS-NN-NG-HD-NS-HD-NN-HD-HD-HD-NI-NG-NG	TAL20Xam668
Manes.04G156400.1.v7.0;pacid=41315352	108	+	0.30037	TCTACACCGCTCGCACTCTCT	6.22372e-05	NI-NG-NI-NN-NI-HD-NS-NS-NN-NG-HD-NS-HD-NN-HD-HD-HD-NI-NG-NG	TAL20Xam668
Manes.08G140800.1.v7.0;pacid=41312676	420	+	0.300358	TCCAGTCACTTCACTCGCATT	6.22659e-05	NI-NG-NI-NN-NI-HD-NS-NS-NN-NG-HD-NS-HD-NN-HD-HD-HD-NI-NG-NG	TAL20Xam668
Manes.03G035300.1.v7.0;pacid=41309372	193	+	0.300346	TTTAGACGCACCTCTCTCTTT	6.22945e-05	NI-NG-NI-NN-NI-HD-NS-NS-NN-NG-HD-NS-HD-NN-HD-HD-HD-NI-NG-NG	TAL20Xam668
Manes.15G013400.1.v7.0;pacid=41306878	5	+	0.300342	AATAATAAAATCAAACCCATA	6.23032e-05	NI-NG-NI-NN-NI-HD-NS-NS-NN-NG-HD-NS-HD-NN-HD-HD-HD-NI-NG-NG	TAL20Xam668
Manes.12G067700.1.v7.0;pacid=41323838	224	+	0.300319	TAAATAAATGCCTAAACCATT	6.23574e-05	NI-NG-NI-NN-NI-HD-NS-NS-NN-NG-HD-NS-HD-NN-HD-HD-HD-NI-NG-NG	TAL20Xam668
Manes.12G073700.1.v7.0;pacid=41323646	1	+	0.3003	TTTAAAAATACCATTCCCATT	6.24035e-05	NI-NG-NI-NN-NI-HD-NS-NS-NN-NG-HD-NS-HD-NN-HD-HD-HD-NI-NG-NG	TAL20Xam668
Manes.15G111500.1.v7.0;pacid=41305195	169	+	0.300278	TATACACGCTTCATTCTGATT	6.24563e-05	NI-NG-NI-NN-NI-HD-NS-NS-NN-NG-HD-NS-HD-NN-HD-HD-HD-NI-NG-NG	TAL20Xam668
Manes.06G149000.1.v7.0;pacid=41304597	173	+	0.300246	AAAAGAAGGATCGATTCCATT	6.25323e-05	NI-NG-NI-NN-NI-HD-NS-NS-NN-NG-HD-NS-HD-NN-HD-HD-HD-NI-NG-NG	TAL20Xam668
Manes.06G149000.2.v7.0;pacid=41304598	173	+	0.300246	AAAAGAAGGATCGATTCCATT	6.25323e-05	NI-NG-NI-NN-NI-HD-NS-NS-NN-NG-HD-NS-HD-NN-HD-HD-HD-NI-NG-NG	TAL20Xam668
Manes.12G111900.1.v7.0;pacid=41322769	81	-	0.300205	TATAACACACTCTCACCTAAT	6.263e-05	NI-NG-NI-NN-NI-HD-NS-NS-NN-NG-HD-NS-HD-NN-HD-HD-HD-NI-NG-NG	TAL20Xam668
Manes.16G089100.1.v7.0;pacid=41318690	232	+	0.300175	CATCTACCTCTCTCGTCCCTT	6.27015e-05	NI-NG-NI-NN-NI-HD-NS-NS-NN-NG-HD-NS-HD-NN-HD-HD-HD-NI-NG-NG	TAL20Xam668
Manes.16G006400.1.v7.0;pacid=41318844	364	-	0.300167	TATTTAGGATTCCAACCCATT	6.27203e-05	NI-NG-NI-NN-NI-HD-NS-NS-NN-NG-HD-NS-HD-NN-HD-HD-HD-NI-NG-NG	TAL20Xam668
Manes.02G109200.1.v7.0;pacid=41339383	110	-	0.300159	TTTTGACAAATAACACCAAAT	6.27404e-05	NI-NG-NI-NN-NI-HD-NS-NS-NN-NG-HD-NS-HD-NN-HD-HD-HD-NI-NG-NG	TAL20Xam668
Manes.07G107500.1.v7.0;pacid=41328032	23	+	0.300142	TGTACACTTATCTAGCACTTT	6.27817e-05	NI-NG-NI-NN-NI-HD-NS-NS-NN-NG-HD-NS-HD-NN-HD-HD-HD-NI-NG-NG	TAL20Xam668
Manes.07G107500.2.v7.0;pacid=41328033	23	+	0.300142	TGTACACTTATCTAGCACTTT	6.27817e-05	NI-NG-NI-NN-NI-HD-NS-NS-NN-NG-HD-NS-HD-NN-HD-HD-HD-NI-NG-NG	TAL20Xam668
Manes.18G136500.1.v7.0;pacid=41333968	245	+	0.300121	TACCTACACGTAAAACCTATT	6.28311e-05	NI-NG-NI-NN-NI-HD-NS-NS-NN-NG-HD-NS-HD-NN-HD-HD-HD-NI-NG-NG	TAL20Xam668
Manes.03G178700.1.v7.0;pacid=41308460	260	+	0.300119	TAAATACCTGCCGTATCCATT	6.28352e-05	NI-NG-NI-NN-NI-HD-NS-NS-NN-NG-HD-NS-HD-NN-HD-HD-HD-NI-NG-NG	TAL20Xam668
Manes.04G053700.1.v7.0;pacid=41315858	6	+	0.300115	TATAAACTAAAAAAAATCATT	6.28454e-05	NI-NG-NI-NN-NI-HD-NS-NS-NN-NG-HD-NS-HD-NN-HD-HD-HD-NI-NG-NG	TAL20Xam668
Manes.11G012600.1.v7.0;pacid=41316756	130	+	0.30011	ATTGGACCAACAGCACCCATT	6.28571e-05	NI-NG-NI-NN-NI-HD-NS-NS-NN-NG-HD-NS-HD-NN-HD-HD-HD-NI-NG-NG	TAL20Xam668
Manes.02G112800.1.v7.0;pacid=41340403	175	+	0.300081	TATATATACCTCGCAAAAATT	6.29277e-05	NI-NG-NI-NN-NI-HD-NS-NS-NN-NG-HD-NS-HD-NN-HD-HD-HD-NI-NG-NG	TAL20Xam668
Manes.12G071400.1.v7.0;pacid=41323745	87	-	0.300076	TCTATTCATGTCCACCCCATA	6.29393e-05	NI-NG-NI-NN-NI-HD-NS-NS-NN-NG-HD-NS-HD-NN-HD-HD-HD-NI-NG-NG	TAL20Xam668
Manes.12G129200.1.v7.0;pacid=41323446	215	+	0.300072	AATTAACAAATCCCTCCCCAT	6.29488e-05	NI-NG-NI-NN-NI-HD-NS-NS-NN-NG-HD-NS-HD-NN-HD-HD-HD-NI-NG-NG	TAL20Xam668
Manes.13G029300.2.v7.0;pacid=41338250	277	+	0.300054	TATATAACAGTAGATCACCTT	6.29916e-05	NI-NG-NI-NN-NI-HD-NS-NS-NN-NG-HD-NS-HD-NN-HD-HD-HD-NI-NG-NG	TAL20Xam668
Manes.14G161400.1.v7.0;pacid=41330918	210	-	0.300042	AATAACCCCGCCACTCTCATT	6.30207e-05	NI-NG-NI-NN-NI-HD-NS-NS-NN-NG-HD-NS-HD-NN-HD-HD-HD-NI-NG-NG	TAL20Xam668
Manes.08G123000.1.v7.0;pacid=41314247	159	+	0.300035	TATAAACCCATCCCGTTCTAT	6.3037e-05	NI-NG-NI-NN-NI-HD-NS-NS-NN-NG-HD-NS-HD-NN-HD-HD-HD-NI-NG-NG	TAL20Xam668
Manes.10G006100.1.v7.0;pacid=41321010	185	+	0.300028	CACAGAATTTTCCCGCCAATA	6.30552e-05	NI-NG-NI-NN-NI-HD-NS-NS-NN-NG-HD-NS-HD-NN-HD-HD-HD-NI-NG-NG	TAL20Xam668
Manes.10G006100.2.v7.0;pacid=41321011	185	+	0.300028	CACAGAATTTTCCCGCCAATA	6.30552e-05	NI-NG-NI-NN-NI-HD-NS-NS-NN-NG-HD-NS-HD-NN-HD-HD-HD-NI-NG-NG	TAL20Xam668
Manes.09G014200.1.v7.0;pacid=41311962	6	+	0.299984	TATAAACTAATTCTGCCATTT	6.31592e-05	NI-NG-NI-NN-NI-HD-NS-NS-NN-NG-HD-NS-HD-NN-HD-HD-HD-NI-NG-NG	TAL20Xam668
Manes.14G024300.1.v7.0;pacid=41332249	155	-	0.299947	TGTACCCAAGGCAAGCACATT	6.32495e-05	NI-NG-NI-NN-NI-HD-NS-NS-NN-NG-HD-NS-HD-NN-HD-HD-HD-NI-NG-NG	TAL20Xam668
Manes.14G147900.1.v7.0;pacid=41331246	301	+	0.299941	TTTAAACAAATAATGATCATT	6.32642e-05	NI-NG-NI-NN-NI-HD-NS-NS-NN-NG-HD-NS-HD-NN-HD-HD-HD-NI-NG-NG	TAL20Xam668
Manes.14G147900.2.v7.0;pacid=41331247	301	+	0.299941	TTTAAACAAATAATGATCATT	6.32642e-05	NI-NG-NI-NN-NI-HD-NS-NS-NN-NG-HD-NS-HD-NN-HD-HD-HD-NI-NG-NG	TAL20Xam668
Manes.02G124700.1.v7.0;pacid=41340439	242	+	0.2999	CAGCAACCAATCAAACCCATA	6.33635e-05	NI-NG-NI-NN-NI-HD-NS-NS-NN-NG-HD-NS-HD-NN-HD-HD-HD-NI-NG-NG	TAL20Xam668
Manes.07G084300.1.v7.0;pacid=41328744	146	+	0.299884	AATAGACTTTTCTCAAATATT	6.34018e-05	NI-NG-NI-NN-NI-HD-NS-NS-NN-NG-HD-NS-HD-NN-HD-HD-HD-NI-NG-NG	TAL20Xam668
Manes.03G162100.1.v7.0;pacid=41309176	324	+	0.299881	TATAAACCTCTCTAATCCCTC	6.34077e-05	NI-NG-NI-NN-NI-HD-NS-NS-NN-NG-HD-NS-HD-NN-HD-HD-HD-NI-NG-NG	TAL20Xam668
Manes.18G083100.1.v7.0;pacid=41333348	191	+	0.299867	AATTGACCAACCCAACCCACT	6.34421e-05	NI-NG-NI-NN-NI-HD-NS-NS-NN-NG-HD-NS-HD-NN-HD-HD-HD-NI-NG-NG	TAL20Xam668
Manes.03G183600.1.v7.0;pacid=41309241	180	-	0.299862	CATAAAAACCTCTAAACCATC	6.3454e-05	NI-NG-NI-NN-NI-HD-NS-NS-NN-NG-HD-NS-HD-NN-HD-HD-HD-NI-NG-NG	TAL20Xam668
Manes.10G052900.1.v7.0;pacid=41320485	114	+	0.299815	TATACACTGCGCAAATCCAAT	6.35681e-05	NI-NG-NI-NN-NI-HD-NS-NS-NN-NG-HD-NS-HD-NN-HD-HD-HD-NI-NG-NG	TAL20Xam668
Manes.08G059900.1.v7.0;pacid=41314047	157	+	0.299805	TATAGCCAGCTTAAACCCCGT	6.35919e-05	NI-NG-NI-NN-NI-HD-NS-NS-NN-NG-HD-NS-HD-NN-HD-HD-HD-NI-NG-NG	TAL20Xam668
Manes.13G130900.2.v7.0;pacid=41337660	237	+	0.299788	TCCTGGAAGTTCACACCCATT	6.3633e-05	NI-NG-NI-NN-NI-HD-NS-NS-NN-NG-HD-NS-HD-NN-HD-HD-HD-NI-NG-NG	TAL20Xam668
Manes.12G035400.1.v7.0;pacid=41323128	198	+	0.299771	TATAGACTCTACTCAAGCAGT	6.36754e-05	NI-NG-NI-NN-NI-HD-NS-NS-NN-NG-HD-NS-HD-NN-HD-HD-HD-NI-NG-NG	TAL20Xam668
Manes.11G138700.1.v7.0;pacid=41318447	184	+	0.299741	TAGAGATGAATCTCTTCCCTT	6.37469e-05	NI-NG-NI-NN-NI-HD-NS-NS-NN-NG-HD-NS-HD-NN-HD-HD-HD-NI-NG-NG	TAL20Xam668
Manes.14G078100.1.v7.0;pacid=41332029	51	-	0.29974	TATAGATTCAGCTCAATCATT	6.37495e-05	NI-NG-NI-NN-NI-HD-NS-NS-NN-NG-HD-NS-HD-NN-HD-HD-HD-NI-NG-NG	TAL20Xam668
Manes.12G007500.1.v7.0;pacid=41323702	206	+	0.299731	TACACGCTAATTTCAACCATT	6.37721e-05	NI-NG-NI-NN-NI-HD-NS-NS-NN-NG-HD-NS-HD-NN-HD-HD-HD-NI-NG-NG	TAL20Xam668
Manes.10G105400.1.v7.0;pacid=41320878	147	+	0.299691	TATAGAAAAATAGAAAATATT	6.38684e-05	NI-NG-NI-NN-NI-HD-NS-NS-NN-NG-HD-NS-HD-NN-HD-HD-HD-NI-NG-NG	TAL20Xam668
Manes.05G105100.1.v7.0;pacid=41335661	189	+	0.299682	TATGACAACGGCCCGTCCATT	6.38919e-05	NI-NG-NI-NN-NI-HD-NS-NS-NN-NG-HD-NS-HD-NN-HD-HD-HD-NI-NG-NG	TAL20Xam668
Manes.02G097700.1.v7.0;pacid=41339136	241	+	0.29968	TTAACACATATTGCACCCATC	6.38955e-05	NI-NG-NI-NN-NI-HD-NS-NS-NN-NG-HD-NS-HD-NN-HD-HD-HD-NI-NG-NG	TAL20Xam668
Manes.04G043600.1.v7.0;pacid=41315198	167	+	0.29963	TCTCGACAATGATCGCCAATT	6.40193e-05	NI-NG-NI-NN-NI-HD-NS-NS-NN-NG-HD-NS-HD-NN-HD-HD-HD-NI-NG-NG	TAL20Xam668
Manes.12G014500.1.v7.0;pacid=41323606	208	-	0.299628	TATAAACCCTAAACACCCAAA	6.40232e-05	NI-NG-NI-NN-NI-HD-NS-NS-NN-NG-HD-NS-HD-NN-HD-HD-HD-NI-NG-NG	TAL20Xam668
Manes.02G058400.1.v7.0;pacid=41339395	40	-	0.299626	TTTAGTACGATCAAACTCATT	6.40283e-05	NI-NG-NI-NN-NI-HD-NS-NS-NN-NG-HD-NS-HD-NN-HD-HD-HD-NI-NG-NG	TAL20Xam668
Manes.06G014700.1.v7.0;pacid=41304784	251	+	0.299623	TATATAAGTGCCACTTGCATT	6.40346e-05	NI-NG-NI-NN-NI-HD-NS-NS-NN-NG-HD-NS-HD-NN-HD-HD-HD-NI-NG-NG	TAL20Xam668
Manes.10G104000.1.v7.0;pacid=41321176	176	-	0.29962	TATACAATTGTCAACCTTATT	6.40428e-05	NI-NG-NI-NN-NI-HD-NS-NS-NN-NG-HD-NS-HD-NN-HD-HD-HD-NI-NG-NG	TAL20Xam668
Manes.09G102900.1.v7.0;pacid=41309936	110	+	0.299605	TATAAATAAAACACGAACCTT	6.40798e-05	NI-NG-NI-NN-NI-HD-NS-NS-NN-NG-HD-NS-HD-NN-HD-HD-HD-NI-NG-NG	TAL20Xam668
Manes.09G102900.2.v7.0;pacid=41309937	118	+	0.299605	TATAAATAAAACACGAACCTT	6.40798e-05	NI-NG-NI-NN-NI-HD-NS-NS-NN-NG-HD-NS-HD-NN-HD-HD-HD-NI-NG-NG	TAL20Xam668
Manes.01G166500.1.v7.0;pacid=41325480	37	+	0.299584	AAATGACAATTCCAGCCCACT	6.41308e-05	NI-NG-NI-NN-NI-HD-NS-NS-NN-NG-HD-NS-HD-NN-HD-HD-HD-NI-NG-NG	TAL20Xam668
Manes.02G155500.1.v7.0;pacid=41341049	36	-	0.299563	TATAGATTCAACCATCCCATA	6.41815e-05	NI-NG-NI-NN-NI-HD-NS-NS-NN-NG-HD-NS-HD-NN-HD-HD-HD-NI-NG-NG	TAL20Xam668
Manes.05G037000.1.v7.0;pacid=41337193	219	+	0.299558	TAAATAACACTAACTCCAATT	6.41951e-05	NI-NG-NI-NN-NI-HD-NS-NS-NN-NG-HD-NS-HD-NN-HD-HD-HD-NI-NG-NG	TAL20Xam668
Manes.13G069800.1.v7.0;pacid=41338157	144	+	0.299544	TAAAAACATTTCCAACTCCTT	6.42289e-05	NI-NG-NI-NN-NI-HD-NS-NS-NN-NG-HD-NS-HD-NN-HD-HD-HD-NI-NG-NG	TAL20Xam668
Manes.13G069800.2.v7.0;pacid=41338158	144	+	0.299544	TAAAAACATTTCCAACTCCTT	6.42289e-05	NI-NG-NI-NN-NI-HD-NS-NS-NN-NG-HD-NS-HD-NN-HD-HD-HD-NI-NG-NG	TAL20Xam668
Manes.18G093300.1.v7.0;pacid=41333217	43	-	0.299542	TCTAGAAGCGTTACCCCCAAC	6.42331e-05	NI-NG-NI-NN-NI-HD-NS-NS-NN-NG-HD-NS-HD-NN-HD-HD-HD-NI-NG-NG	TAL20Xam668
Manes.12G108500.1.v7.0;pacid=41323406	89	-	0.29952	TTTACACAAGTCGCTCTCCGT	6.42875e-05	NI-NG-NI-NN-NI-HD-NS-NS-NN-NG-HD-NS-HD-NN-HD-HD-HD-NI-NG-NG	TAL20Xam668
Manes.12G008500.2.v7.0;pacid=41323889	125	+	0.299517	AATAGCCAACTCCAACCCAAA	6.42944e-05	NI-NG-NI-NN-NI-HD-NS-NS-NN-NG-HD-NS-HD-NN-HD-HD-HD-NI-NG-NG	TAL20Xam668
Manes.11G013000.1.v7.0;pacid=41318178	3	-	0.299505	TAAACCCATGTCCCATTCATT	6.4324e-05	NI-NG-NI-NN-NI-HD-NS-NS-NN-NG-HD-NS-HD-NN-HD-HD-HD-NI-NG-NG	TAL20Xam668
Manes.05G174900.1.v7.0;pacid=41337192	134	-	0.299498	TATATATATATATAGCCCTTT	6.43401e-05	NI-NG-NI-NN-NI-HD-NS-NS-NN-NG-HD-NS-HD-NN-HD-HD-HD-NI-NG-NG	TAL20Xam668
Manes.06G122700.2.v7.0;pacid=41303409	223	-	0.299409	TATAAACCCCTAGCACTCACG	6.45592e-05	NI-NG-NI-NN-NI-HD-NS-NS-NN-NG-HD-NS-HD-NN-HD-HD-HD-NI-NG-NG	TAL20Xam668
Manes.01G196900.1.v7.0;pacid=41324248	136	+	0.299392	TGTATACCATTAACGCATATT	6.46012e-05	NI-NG-NI-NN-NI-HD-NS-NS-NN-NG-HD-NS-HD-NN-HD-HD-HD-NI-NG-NG	TAL20Xam668
Manes.08G109800.1.v7.0;pacid=41314141	478	-	0.299383	TACAGATGGTTTAAGACCATT	6.46221e-05	NI-NG-NI-NN-NI-HD-NS-NS-NN-NG-HD-NS-HD-NN-HD-HD-HD-NI-NG-NG	TAL20Xam668
Manes.07G068300.1.v7.0;pacid=41328667	40	+	0.299381	AGTACAAATGTCACAACCATC	6.46271e-05	NI-NG-NI-NN-NI-HD-NS-NS-NN-NG-HD-NS-HD-NN-HD-HD-HD-NI-NG-NG	TAL20Xam668
Manes.01G215100.1.v7.0;pacid=41324953	229	+	0.299377	TATTCACTTCTCTCTCTCAAT	6.46376e-05	NI-NG-NI-NN-NI-HD-NS-NS-NN-NG-HD-NS-HD-NN-HD-HD-HD-NI-NG-NG	TAL20Xam668
Manes.01G211200.1.v7.0;pacid=41326198	37	-	0.299375	TATTTTCCTGTCATGCCTATT	6.46426e-05	NI-NG-NI-NN-NI-HD-NS-NS-NN-NG-HD-NS-HD-NN-HD-HD-HD-NI-NG-NG	TAL20Xam668
Manes.S004900.1.v7.0;pacid=41311349	261	-	0.299367	TATAGACCTTACACACTAATC	6.46633e-05	NI-NG-NI-NN-NI-HD-NS-NS-NN-NG-HD-NS-HD-NN-HD-HD-HD-NI-NG-NG	TAL20Xam668
Manes.03G011800.1.v7.0;pacid=41307801	418	+	0.299294	TATGTATATATCTCCCCCATG	6.48427e-05	NI-NG-NI-NN-NI-HD-NS-NS-NN-NG-HD-NS-HD-NN-HD-HD-HD-NI-NG-NG	TAL20Xam668
Manes.03G011800.2.v7.0;pacid=41307802	411	+	0.299294	TATGTATATATCTCCCCCATG	6.48427e-05	NI-NG-NI-NN-NI-HD-NS-NS-NN-NG-HD-NS-HD-NN-HD-HD-HD-NI-NG-NG	TAL20Xam668
Manes.09G035700.1.v7.0;pacid=41311885	158	-	0.299289	GACTCACTCGTCTCGACCATT	6.48545e-05	NI-NG-NI-NN-NI-HD-NS-NS-NN-NG-HD-NS-HD-NN-HD-HD-HD-NI-NG-NG	TAL20Xam668
Manes.02G176700.1.v7.0;pacid=41341566	172	+	0.299289	CATAGGAGTTTCCAATCCATT	6.48546e-05	NI-NG-NI-NN-NI-HD-NS-NS-NN-NG-HD-NS-HD-NN-HD-HD-HD-NI-NG-NG	TAL20Xam668
Manes.13G018500.1.v7.0;pacid=41338269	356	-	0.299287	AATTCACGGATCTCGCCGAAT	6.48587e-05	NI-NG-NI-NN-NI-HD-NS-NS-NN-NG-HD-NS-HD-NN-HD-HD-HD-NI-NG-NG	TAL20Xam668
Manes.06G055900.1.v7.0;pacid=41304254	140	-	0.299281	TATATACACATCCCAAAAATA	6.48744e-05	NI-NG-NI-NN-NI-HD-NS-NS-NN-NG-HD-NS-HD-NN-HD-HD-HD-NI-NG-NG	TAL20Xam668
Manes.01G204600.1.v7.0;pacid=41327367	470	+	0.299251	GATAAAACTCTCCTTCCCATT	6.49493e-05	NI-NG-NI-NN-NI-HD-NS-NS-NN-NG-HD-NS-HD-NN-HD-HD-HD-NI-NG-NG	TAL20Xam668
Manes.12G100600.2.v7.0;pacid=41322852	159	+	0.299239	TATAATACACTCATCCCCATC	6.49776e-05	NI-NG-NI-NN-NI-HD-NS-NS-NN-NG-HD-NS-HD-NN-HD-HD-HD-NI-NG-NG	TAL20Xam668
Manes.08G169700.1.v7.0;pacid=41313015	180	+	0.299225	TATAAAAGCCCCGCAACCACA	6.50121e-05	NI-NG-NI-NN-NI-HD-NS-NS-NN-NG-HD-NS-HD-NN-HD-HD-HD-NI-NG-NG	TAL20Xam668
Manes.06G052700.1.v7.0;pacid=41304372	139	+	0.299198	TATTAAAAGCCAACACACATT	6.50793e-05	NI-NG-NI-NN-NI-HD-NS-NS-NN-NG-HD-NS-HD-NN-HD-HD-HD-NI-NG-NG	TAL20Xam668
Manes.17G055400.1.v7.0;pacid=41329523	130	-	0.299174	TCTAACCGAATTACTCCAATT	6.51398e-05	NI-NG-NI-NN-NI-HD-NS-NS-NN-NG-HD-NS-HD-NN-HD-HD-HD-NI-NG-NG	TAL20Xam668
Manes.16G053800.1.v7.0;pacid=41318918	41	+	0.299174	TACAAACAAATCACGCAAAAC	6.51399e-05	NI-NG-NI-NN-NI-HD-NS-NS-NN-NG-HD-NS-HD-NN-HD-HD-HD-NI-NG-NG	TAL20Xam668
Manes.16G053800.2.v7.0;pacid=41318919	41	+	0.299174	TACAAACAAATCACGCAAAAC	6.51399e-05	NI-NG-NI-NN-NI-HD-NS-NS-NN-NG-HD-NS-HD-NN-HD-HD-HD-NI-NG-NG	TAL20Xam668
Manes.02G077500.1.v7.0;pacid=41341477	396	-	0.299172	TATAGAAAATACAAACCAATA	6.51454e-05	NI-NG-NI-NN-NI-HD-NS-NS-NN-NG-HD-NS-HD-NN-HD-HD-HD-NI-NG-NG	TAL20Xam668
Manes.08G143800.1.v7.0;pacid=41313764	46	+	0.299163	TACAAACCCATGGCGCCCCTA	6.51676e-05	NI-NG-NI-NN-NI-HD-NS-NS-NN-NG-HD-NS-HD-NN-HD-HD-HD-NI-NG-NG	TAL20Xam668
Manes.07G101600.1.v7.0;pacid=41329293	121	-	0.299132	TATAAACTGCTTGCAGTCATT	6.5243e-05	NI-NG-NI-NN-NI-HD-NS-NS-NN-NG-HD-NS-HD-NN-HD-HD-HD-NI-NG-NG	TAL20Xam668
Manes.01G065600.1.v7.0;pacid=41324368	116	-	0.299107	TAAAAAAAAATCCAAACAATT	6.53049e-05	NI-NG-NI-NN-NI-HD-NS-NS-NN-NG-HD-NS-HD-NN-HD-HD-HD-NI-NG-NG	TAL20Xam668
Manes.02G203800.1.v7.0;pacid=41340419	136	-	0.299103	AACACGCGGATCCCACCAATT	6.53159e-05	NI-NG-NI-NN-NI-HD-NS-NS-NN-NG-HD-NS-HD-NN-HD-HD-HD-NI-NG-NG	TAL20Xam668
Manes.15G017000.1.v7.0;pacid=41306792	103	+	0.299054	TGTGGACAGCTCCAAATCATT	6.54374e-05	NI-NG-NI-NN-NI-HD-NS-NS-NN-NG-HD-NS-HD-NN-HD-HD-HD-NI-NG-NG	TAL20Xam668
Manes.06G077600.1.v7.0;pacid=41303714	229	+	0.29905	TATCTCACTTTCCAACCCATT	6.54473e-05	NI-NG-NI-NN-NI-HD-NS-NS-NN-NG-HD-NS-HD-NN-HD-HD-HD-NI-NG-NG	TAL20Xam668
Manes.07G136700.1.v7.0;pacid=41328312	155	+	0.299035	CAAAGAAAGATCTAAACAATT	6.54837e-05	NI-NG-NI-NN-NI-HD-NS-NS-NN-NG-HD-NS-HD-NN-HD-HD-HD-NI-NG-NG	TAL20Xam668
Manes.17G053400.1.v7.0;pacid=41329677	168	+	0.298993	TTCAGACATTTCTTACACATT	6.55886e-05	NI-NG-NI-NN-NI-HD-NS-NS-NN-NG-HD-NS-HD-NN-HD-HD-HD-NI-NG-NG	TAL20Xam668
Manes.05G022800.1.v7.0;pacid=41335766	75	+	0.298985	TTAACAGAACTCACTCCCATT	6.56106e-05	NI-NG-NI-NN-NI-HD-NS-NS-NN-NG-HD-NS-HD-NN-HD-HD-HD-NI-NG-NG	TAL20Xam668
Manes.05G022800.2.v7.0;pacid=41335767	265	+	0.298985	TTAACAGAACTCACTCCCATT	6.56106e-05	NI-NG-NI-NN-NI-HD-NS-NS-NN-NG-HD-NS-HD-NN-HD-HD-HD-NI-NG-NG	TAL20Xam668
Manes.05G022800.3.v7.0;pacid=41335768	75	+	0.298985	TTAACAGAACTCACTCCCATT	6.56106e-05	NI-NG-NI-NN-NI-HD-NS-NS-NN-NG-HD-NS-HD-NN-HD-HD-HD-NI-NG-NG	TAL20Xam668
Manes.02G102900.1.v7.0;pacid=41339452	275	-	0.298973	TATAGATTGATCGCTTCAATC	6.56396e-05	NI-NG-NI-NN-NI-HD-NS-NS-NN-NG-HD-NS-HD-NN-HD-HD-HD-NI-NG-NG	TAL20Xam668
Manes.14G059500.1.v7.0;pacid=41332525	26	+	0.298956	TAAAAAAAATACAAAACCATT	6.56816e-05	NI-NG-NI-NN-NI-HD-NS-NS-NN-NG-HD-NS-HD-NN-HD-HD-HD-NI-NG-NG	TAL20Xam668
Manes.14G059500.2.v7.0;pacid=41332527	26	+	0.298956	TAAAAAAAATACAAAACCATT	6.56816e-05	NI-NG-NI-NN-NI-HD-NS-NS-NN-NG-HD-NS-HD-NN-HD-HD-HD-NI-NG-NG	TAL20Xam668
Manes.13G138400.1.v7.0;pacid=41338925	305	-	0.29895	AATAAAAAAATGGCGCCCAGT	6.56966e-05	NI-NG-NI-NN-NI-HD-NS-NS-NN-NG-HD-NS-HD-NN-HD-HD-HD-NI-NG-NG	TAL20Xam668
Manes.09G133200.1.v7.0;pacid=41312189	141	+	0.298944	TAAACACGACTAACCCTCAAT	6.57128e-05	NI-NG-NI-NN-NI-HD-NS-NS-NN-NG-HD-NS-HD-NN-HD-HD-HD-NI-NG-NG	TAL20Xam668
Manes.14G051700.1.v7.0;pacid=41332421	215	+	0.298931	GTTTCGCTTGTCGCGCCCATT	6.57434e-05	NI-NG-NI-NN-NI-HD-NS-NS-NN-NG-HD-NS-HD-NN-HD-HD-HD-NI-NG-NG	TAL20Xam668
Manes.13G048700.1.v7.0;pacid=41337973	38	+	0.298919	TATAGAATGGTCAAAACATTA	6.57734e-05	NI-NG-NI-NN-NI-HD-NS-NS-NN-NG-HD-NS-HD-NN-HD-HD-HD-NI-NG-NG	TAL20Xam668
Manes.05G028900.1.v7.0;pacid=41335156	111	-	0.298897	TAAAGCCAAGCCAAGCCAACT	6.58307e-05	NI-NG-NI-NN-NI-HD-NS-NS-NN-NG-HD-NS-HD-NN-HD-HD-HD-NI-NG-NG	TAL20Xam668
Manes.17G007700.1.v7.0;pacid=41330737	132	+	0.298865	TCTAAAAGAGTCCTATCCATC	6.59091e-05	NI-NG-NI-NN-NI-HD-NS-NS-NN-NG-HD-NS-HD-NN-HD-HD-HD-NI-NG-NG	TAL20Xam668
Manes.02G227100.3.v7.0;pacid=41339600	156	-	0.298863	TTTGACCACATCATACCCATT	6.59137e-05	NI-NG-NI-NN-NI-HD-NS-NS-NN-NG-HD-NS-HD-NN-HD-HD-HD-NI-NG-NG	TAL20Xam668
Manes.04G007400.1.v7.0;pacid=41315300	88	+	0.29886	TAAATAAATGTAACACACCTT	6.59231e-05	NI-NG-NI-NN-NI-HD-NS-NS-NN-NG-HD-NS-HD-NN-HD-HD-HD-NI-NG-NG	TAL20Xam668
Manes.04G007400.2.v7.0;pacid=41315301	88	+	0.29886	TAAATAAATGTAACACACCTT	6.59231e-05	NI-NG-NI-NN-NI-HD-NS-NS-NN-NG-HD-NS-HD-NN-HD-HD-HD-NI-NG-NG	TAL20Xam668
Manes.09G094500.1.v7.0;pacid=41311934	75	+	0.29885	TGTTGGATAGTCCCACGCATT	6.59478e-05	NI-NG-NI-NN-NI-HD-NS-NS-NN-NG-HD-NS-HD-NN-HD-HD-HD-NI-NG-NG	TAL20Xam668
Manes.14G044100.1.v7.0;pacid=41332766	236	-	0.298849	CATGGCTTGTTCAAGCCCATT	6.59505e-05	NI-NG-NI-NN-NI-HD-NS-NS-NN-NG-HD-NS-HD-NN-HD-HD-HD-NI-NG-NG	TAL20Xam668
Manes.10G035000.1.v7.0;pacid=41320739	44	+	0.298832	CATACACGTGTCTCAAATACT	6.59924e-05	NI-NG-NI-NN-NI-HD-NS-NS-NN-NG-HD-NS-HD-NN-HD-HD-HD-NI-NG-NG	TAL20Xam668
Manes.15G067000.1.v7.0;pacid=41305058	227	+	0.29879	TATAAAAATATCTCTATCTTT	6.6098e-05	NI-NG-NI-NN-NI-HD-NS-NS-NN-NG-HD-NS-HD-NN-HD-HD-HD-NI-NG-NG	TAL20Xam668
Manes.10G143900.1.v7.0;pacid=41321151	376	+	0.298784	GAGAAAAAAATCCCACCCAAT	6.61137e-05	NI-NG-NI-NN-NI-HD-NS-NS-NN-NG-HD-NS-HD-NN-HD-HD-HD-NI-NG-NG	TAL20Xam668
Manes.02G153700.1.v7.0;pacid=41341475	251	+	0.29877	TTTATAAAGCTCAATCTCATT	6.61478e-05	NI-NG-NI-NN-NI-HD-NS-NS-NN-NG-HD-NS-HD-NN-HD-HD-HD-NI-NG-NG	TAL20Xam668
Manes.17G050200.1.v7.0;pacid=41330060	95	+	0.29875	TAGAGCCACGTTACACACAGT	6.61974e-05	NI-NG-NI-NN-NI-HD-NS-NS-NN-NG-HD-NS-HD-NN-HD-HD-HD-NI-NG-NG	TAL20Xam668
Manes.09G144400.1.v7.0;pacid=41310622	118	+	0.298749	TCAAAACAAACATAACCCATT	6.62022e-05	NI-NG-NI-NN-NI-HD-NS-NS-NN-NG-HD-NS-HD-NN-HD-HD-HD-NI-NG-NG	TAL20Xam668
Manes.14G047900.1.v7.0;pacid=41332864	111	-	0.298748	CACCAACAAAGCACGCCCATA	6.62036e-05	NI-NG-NI-NN-NI-HD-NS-NS-NN-NG-HD-NS-HD-NN-HD-HD-HD-NI-NG-NG	TAL20Xam668
Manes.03G144400.1.v7.0;pacid=41307773	95	+	0.298693	TCCAACCAACACCAGCCCATT	6.6341e-05	NI-NG-NI-NN-NI-HD-NS-NS-NN-NG-HD-NS-HD-NN-HD-HD-HD-NI-NG-NG	TAL20Xam668
Manes.11G147500.2.v7.0;pacid=41316812	49	+	0.298682	CATAAAATGGGCACCACGATT	6.63709e-05	NI-NG-NI-NN-NI-HD-NS-NS-NN-NG-HD-NS-HD-NN-HD-HD-HD-NI-NG-NG	TAL20Xam668
Manes.04G043900.1.v7.0;pacid=41316000	119	+	0.298675	TCTAAACTCCTCTTAACCATA	6.63888e-05	NI-NG-NI-NN-NI-HD-NS-NS-NN-NG-HD-NS-HD-NN-HD-HD-HD-NI-NG-NG	TAL20Xam668
Manes.09G073600.1.v7.0;pacid=41311761	227	-	0.29866	TAATGCCCTTTCACCACCATT	6.64251e-05	NI-NG-NI-NN-NI-HD-NS-NS-NN-NG-HD-NS-HD-NN-HD-HD-HD-NI-NG-NG	TAL20Xam668
Manes.09G126200.1.v7.0;pacid=41310418	159	-	0.298644	TATATAGACGTCAAGCCAATG	6.6465e-05	NI-NG-NI-NN-NI-HD-NS-NS-NN-NG-HD-NS-HD-NN-HD-HD-HD-NI-NG-NG	TAL20Xam668
Manes.09G084000.1.v7.0;pacid=41311553	60	+	0.298639	TATGCAAAGATCACTCTCTTT	6.64786e-05	NI-NG-NI-NN-NI-HD-NS-NS-NN-NG-HD-NS-HD-NN-HD-HD-HD-NI-NG-NG	TAL20Xam668
Manes.03G042300.1.v7.0;pacid=41308550	203	+	0.298616	TCTTGAATGGATAAGCCCATT	6.65378e-05	NI-NG-NI-NN-NI-HD-NS-NS-NN-NG-HD-NS-HD-NN-HD-HD-HD-NI-NG-NG	TAL20Xam668
Manes.17G093500.1.v7.0;pacid=41329736	166	+	0.298614	TATCATCAAGCCAAGACCAAT	6.65408e-05	NI-NG-NI-NN-NI-HD-NS-NS-NN-NG-HD-NS-HD-NN-HD-HD-HD-NI-NG-NG	TAL20Xam668
Manes.12G089900.1.v7.0;pacid=41324046	95	+	0.29861	TATTAAAACGTCTCAAACGTT	6.65523e-05	NI-NG-NI-NN-NI-HD-NS-NS-NN-NG-HD-NS-HD-NN-HD-HD-HD-NI-NG-NG	TAL20Xam668
Manes.14G088600.1.v7.0;pacid=41331034	160	+	0.298604	AAGAAACAAACCACCCCAATT	6.65667e-05	NI-NG-NI-NN-NI-HD-NS-NS-NN-NG-HD-NS-HD-NN-HD-HD-HD-NI-NG-NG	TAL20Xam668
Manes.11G009600.1.v7.0;pacid=41318058	60	-	0.298602	AATAAAACTCTCTAACACATT	6.65724e-05	NI-NG-NI-NN-NI-HD-NS-NS-NN-NG-HD-NS-HD-NN-HD-HD-HD-NI-NG-NG	TAL20Xam668
Manes.10G104300.1.v7.0;pacid=41320855	192	+	0.298588	ATGATAAAAGTCCAGCCCATT	6.66082e-05	NI-NG-NI-NN-NI-HD-NS-NS-NN-NG-HD-NS-HD-NN-HD-HD-HD-NI-NG-NG	TAL20Xam668
Manes.10G104300.2.v7.0;pacid=41320856	192	+	0.298588	ATGATAAAAGTCCAGCCCATT	6.66082e-05	NI-NG-NI-NN-NI-HD-NS-NS-NN-NG-HD-NS-HD-NN-HD-HD-HD-NI-NG-NG	TAL20Xam668
Manes.10G104300.3.v7.0;pacid=41320857	192	+	0.298588	ATGATAAAAGTCCAGCCCATT	6.66082e-05	NI-NG-NI-NN-NI-HD-NS-NS-NN-NG-HD-NS-HD-NN-HD-HD-HD-NI-NG-NG	TAL20Xam668
Manes.05G088800.1.v7.0;pacid=41336950	242	+	0.298564	TATAAAAAGTTAAAACCCCTG	6.66691e-05	NI-NG-NI-NN-NI-HD-NS-NS-NN-NG-HD-NS-HD-NN-HD-HD-HD-NI-NG-NG	TAL20Xam668
Manes.02G134500.1.v7.0;pacid=41340246	254	+	0.298557	TATTGGCACATCTTGAACATT	6.66863e-05	NI-NG-NI-NN-NI-HD-NS-NS-NN-NG-HD-NS-HD-NN-HD-HD-HD-NI-NG-NG	TAL20Xam668
Manes.03G205200.3.v7.0;pacid=41308884	74	-	0.298554	CCAAAACCAGTACCACGCATT	6.6694e-05	NI-NG-NI-NN-NI-HD-NS-NS-NN-NG-HD-NS-HD-NN-HD-HD-HD-NI-NG-NG	TAL20Xam668
Manes.03G091900.1.v7.0;pacid=41309348	136	+	0.298542	CATAAAAAATTCAATACAATT	6.67229e-05	NI-NG-NI-NN-NI-HD-NS-NS-NN-NG-HD-NS-HD-NN-HD-HD-HD-NI-NG-NG	TAL20Xam668
Manes.01G135200.1.v7.0;pacid=41324545	365	+	0.298523	TATAAACGCCAAACGCCCCCA	6.6772e-05	NI-NG-NI-NN-NI-HD-NS-NS-NN-NG-HD-NS-HD-NN-HD-HD-HD-NI-NG-NG	TAL20Xam668
Manes.02G112900.1.v7.0;pacid=41340464	226	-	0.298512	ACAAGAACAATCGCACCCACT	6.68014e-05	NI-NG-NI-NN-NI-HD-NS-NS-NN-NG-HD-NS-HD-NN-HD-HD-HD-NI-NG-NG	TAL20Xam668
Manes.07G052300.1.v7.0;pacid=41328404	28	-	0.298495	CCAAAAAATCTCTCCCCCATT	6.6844e-05	NI-NG-NI-NN-NI-HD-NS-NS-NN-NG-HD-NS-HD-NN-HD-HD-HD-NI-NG-NG	TAL20Xam668
Manes.10G086100.1.v7.0;pacid=41321519	208	+	0.298488	TATAAACGCCTCCATCTCAAC	6.68607e-05	NI-NG-NI-NN-NI-HD-NS-NS-NN-NG-HD-NS-HD-NN-HD-HD-HD-NI-NG-NG	TAL20Xam668
Manes.S048700.1.v7.0;pacid=41320375	257	+	0.298462	TATATATAAATCACCACCAAC	6.69261e-05	NI-NG-NI-NN-NI-HD-NS-NS-NN-NG-HD-NS-HD-NN-HD-HD-HD-NI-NG-NG	TAL20Xam668
Manes.11G089900.1.v7.0;pacid=41317627	240	+	0.298444	TTTCAAAGCATCTCTCTCATT	6.69721e-05	NI-NG-NI-NN-NI-HD-NS-NS-NN-NG-HD-NS-HD-NN-HD-HD-HD-NI-NG-NG	TAL20Xam668
Manes.10G107200.1.v7.0;pacid=41321565	28	-	0.298402	TAAAAACTAGTCTAAACCCCT	6.70808e-05	NI-NG-NI-NN-NI-HD-NS-NS-NN-NG-HD-NS-HD-NN-HD-HD-HD-NI-NG-NG	TAL20Xam668
Manes.01G134100.1.v7.0;pacid=41324159	122	+	0.298386	TATATAAAATTCACCAAAATT	6.71197e-05	NI-NG-NI-NN-NI-HD-NS-NS-NN-NG-HD-NS-HD-NN-HD-HD-HD-NI-NG-NG	TAL20Xam668
Manes.17G068300.1.v7.0;pacid=41329538	94	-	0.298381	TCTAGACTAGACCTGCCCAAG	6.71348e-05	NI-NG-NI-NN-NI-HD-NS-NS-NN-NG-HD-NS-HD-NN-HD-HD-HD-NI-NG-NG	TAL20Xam668
Manes.13G083900.1.v7.0;pacid=41338974	174	-	0.298354	TATCAACAAGGTAAGCCTATT	6.72018e-05	NI-NG-NI-NN-NI-HD-NS-NS-NN-NG-HD-NS-HD-NN-HD-HD-HD-NI-NG-NG	TAL20Xam668
Manes.09G053900.1.v7.0;pacid=41310215	246	-	0.298346	TTTTGACCTGTAAACCCCCTT	6.7224e-05	NI-NG-NI-NN-NI-HD-NS-NS-NN-NG-HD-NS-HD-NN-HD-HD-HD-NI-NG-NG	TAL20Xam668
Manes.08G119100.1.v7.0;pacid=41313857	44	+	0.298337	AATCGAAGAATATCTCCCAAT	6.72454e-05	NI-NG-NI-NN-NI-HD-NS-NS-NN-NG-HD-NS-HD-NN-HD-HD-HD-NI-NG-NG	TAL20Xam668
Manes.08G119100.2.v7.0;pacid=41313858	44	+	0.298337	AATCGAAGAATATCTCCCAAT	6.72454e-05	NI-NG-NI-NN-NI-HD-NS-NS-NN-NG-HD-NS-HD-NN-HD-HD-HD-NI-NG-NG	TAL20Xam668
Manes.03G084800.1.v7.0;pacid=41309712	219	+	0.298314	TAAAAACGGATAAAACGAATT	6.73045e-05	NI-NG-NI-NN-NI-HD-NS-NS-NN-NG-HD-NS-HD-NN-HD-HD-HD-NI-NG-NG	TAL20Xam668
Manes.03G193900.1.v7.0;pacid=41309683	181	-	0.298307	AATAAACAAAACGAGACCTTT	6.73233e-05	NI-NG-NI-NN-NI-HD-NS-NS-NN-NG-HD-NS-HD-NN-HD-HD-HD-NI-NG-NG	TAL20Xam668
Manes.16G054600.1.v7.0;pacid=41320050	144	-	0.298267	TCTCCACTAATCACACCCTTA	6.74251e-05	NI-NG-NI-NN-NI-HD-NS-NS-NN-NG-HD-NS-HD-NN-HD-HD-HD-NI-NG-NG	TAL20Xam668
Manes.S078000.1.v7.0;pacid=41316524	76	-	0.298267	TCTCCACTAATCACACCCTTA	6.74251e-05	NI-NG-NI-NN-NI-HD-NS-NS-NN-NG-HD-NS-HD-NN-HD-HD-HD-NI-NG-NG	TAL20Xam668
Manes.10G028700.1.v7.0;pacid=41320810	168	+	0.298244	TAAATATGAATCCCACCCCAT	6.74829e-05	NI-NG-NI-NN-NI-HD-NS-NS-NN-NG-HD-NS-HD-NN-HD-HD-HD-NI-NG-NG	TAL20Xam668
Manes.08G172700.1.v7.0;pacid=41314269	60	+	0.298163	TGTAGTCTTGTCACAAAGATT	6.76916e-05	NI-NG-NI-NN-NI-HD-NS-NS-NN-NG-HD-NS-HD-NN-HD-HD-HD-NI-NG-NG	TAL20Xam668
Manes.15G100700.1.v7.0;pacid=41306181	95	+	0.298155	CATAAAAAACTCAAATCTATT	6.77118e-05	NI-NG-NI-NN-NI-HD-NS-NS-NN-NG-HD-NS-HD-NN-HD-HD-HD-NI-NG-NG	TAL20Xam668
Manes.04G065200.3.v7.0;pacid=41315348	105	-	0.298149	AATAAACATCTCTCTCCCTTG	6.77275e-05	NI-NG-NI-NN-NI-HD-NS-NS-NN-NG-HD-NS-HD-NN-HD-HD-HD-NI-NG-NG	TAL20Xam668
Manes.07G043400.1.v7.0;pacid=41327970	310	+	0.298125	TCCAAAATCCTCTTACCCATT	6.77888e-05	NI-NG-NI-NN-NI-HD-NS-NS-NN-NG-HD-NS-HD-NN-HD-HD-HD-NI-NG-NG	TAL20Xam668
Manes.09G029700.1.v7.0;pacid=41310779	155	-	0.298108	TTTTAACTGTTCAAACACATT	6.78325e-05	NI-NG-NI-NN-NI-HD-NS-NS-NN-NG-HD-NS-HD-NN-HD-HD-HD-NI-NG-NG	TAL20Xam668
Manes.02G037900.1.v7.0;pacid=41340578	235	-	0.298025	AAGAAACAGGCCTAGCCCAAT	6.80463e-05	NI-NG-NI-NN-NI-HD-NS-NS-NN-NG-HD-NS-HD-NN-HD-HD-HD-NI-NG-NG	TAL20Xam668
Manes.02G037900.2.v7.0;pacid=41340579	235	-	0.298025	AAGAAACAGGCCTAGCCCAAT	6.80463e-05	NI-NG-NI-NN-NI-HD-NS-NS-NN-NG-HD-NS-HD-NN-HD-HD-HD-NI-NG-NG	TAL20Xam668
Manes.11G113100.1.v7.0;pacid=41318427	241	+	0.297985	CCTAGATACACCTCACCCAAT	6.81506e-05	NI-NG-NI-NN-NI-HD-NS-NS-NN-NG-HD-NS-HD-NN-HD-HD-HD-NI-NG-NG	TAL20Xam668
Manes.03G120600.1.v7.0;pacid=41308807	58	-	0.297978	TATACACTGATCCGACCGATC	6.81681e-05	NI-NG-NI-NN-NI-HD-NS-NS-NN-NG-HD-NS-HD-NN-HD-HD-HD-NI-NG-NG	TAL20Xam668
Manes.05G106500.1.v7.0;pacid=41336105	195	+	0.297953	TATCTAAAACCAGAACCCATT	6.82348e-05	NI-NG-NI-NN-NI-HD-NS-NS-NN-NG-HD-NS-HD-NN-HD-HD-HD-NI-NG-NG	TAL20Xam668
Manes.13G136300.1.v7.0;pacid=41337264	272	+	0.297949	TATAAACCCTTCTCCTCGCTT	6.82447e-05	NI-NG-NI-NN-NI-HD-NS-NS-NN-NG-HD-NS-HD-NN-HD-HD-HD-NI-NG-NG	TAL20Xam668
Manes.12G155300.1.v7.0;pacid=41323396	165	+	0.297938	TATAGAAGGCTTGCTACAAAT	6.82721e-05	NI-NG-NI-NN-NI-HD-NS-NS-NN-NG-HD-NS-HD-NN-HD-HD-HD-NI-NG-NG	TAL20Xam668
Manes.13G121800.1.v7.0;pacid=41337624	44	-	0.297937	TATAATATCGTCACAACAAAT	6.82751e-05	NI-NG-NI-NN-NI-HD-NS-NS-NN-NG-HD-NS-HD-NN-HD-HD-HD-NI-NG-NG	TAL20Xam668
Manes.02G093300.1.v7.0;pacid=41340776	280	+	0.297929	TCTCGCATGGTCTCGACCTTT	6.82947e-05	NI-NG-NI-NN-NI-HD-NS-NS-NN-NG-HD-NS-HD-NN-HD-HD-HD-NI-NG-NG	TAL20Xam668
Manes.17G113600.1.v7.0;pacid=41329482	125	+	0.297916	CTTAGACGTGTAACGTAAATT	6.83294e-05	NI-NG-NI-NN-NI-HD-NS-NS-NN-NG-HD-NS-HD-NN-HD-HD-HD-NI-NG-NG	TAL20Xam668
Manes.14G125400.1.v7.0;pacid=41331235	22	+	0.29788	TATTAAAAAAAACCACCCATA	6.84221e-05	NI-NG-NI-NN-NI-HD-NS-NS-NN-NG-HD-NS-HD-NN-HD-HD-HD-NI-NG-NG	TAL20Xam668
Manes.07G138900.1.v7.0;pacid=41328627	198	+	0.297867	CAGAGAAGTTTCCCGCCAATG	6.84579e-05	NI-NG-NI-NN-NI-HD-NS-NS-NN-NG-HD-NS-HD-NN-HD-HD-HD-NI-NG-NG	TAL20Xam668
Manes.08G171800.1.v7.0;pacid=41312837	205	+	0.297848	TATAAACACCTATCCAGCAAT	6.85065e-05	NI-NG-NI-NN-NI-HD-NS-NS-NN-NG-HD-NS-HD-NN-HD-HD-HD-NI-NG-NG	TAL20Xam668
Manes.07G002400.1.v7.0;pacid=41328042	161	+	0.297835	TCTAGACATGACCCACTTCTT	6.85398e-05	NI-NG-NI-NN-NI-HD-NS-NS-NN-NG-HD-NS-HD-NN-HD-HD-HD-NI-NG-NG	TAL20Xam668
Manes.18G006100.1.v7.0;pacid=41334563	125	-	0.297822	TATGCACGCAGCACGCGCATA	6.8575e-05	NI-NG-NI-NN-NI-HD-NS-NS-NN-NG-HD-NS-HD-NN-HD-HD-HD-NI-NG-NG	TAL20Xam668
Manes.17G093300.1.v7.0;pacid=41330469	7	+	0.297811	TATATAATTTTCCCTCACTTT	6.86036e-05	NI-NG-NI-NN-NI-HD-NS-NS-NN-NG-HD-NS-HD-NN-HD-HD-HD-NI-NG-NG	TAL20Xam668
Manes.11G146800.1.v7.0;pacid=41316714	258	+	0.29781	TAAAAACCAAACAAAACAATT	6.86039e-05	NI-NG-NI-NN-NI-HD-NS-NS-NN-NG-HD-NS-HD-NN-HD-HD-HD-NI-NG-NG	TAL20Xam668
Manes.11G146800.2.v7.0;pacid=41316715	310	+	0.29781	TAAAAACCAAACAAAACAATT	6.86039e-05	NI-NG-NI-NN-NI-HD-NS-NS-NN-NG-HD-NS-HD-NN-HD-HD-HD-NI-NG-NG	TAL20Xam668
Manes.11G146800.3.v7.0;pacid=41316716	258	+	0.29781	TAAAAACCAAACAAAACAATT	6.86039e-05	NI-NG-NI-NN-NI-HD-NS-NS-NN-NG-HD-NS-HD-NN-HD-HD-HD-NI-NG-NG	TAL20Xam668
Manes.15G023500.1.v7.0;pacid=41304931	17	-	0.297794	TTTCGACAACTTGCTCCTATT	6.86463e-05	NI-NG-NI-NN-NI-HD-NS-NS-NN-NG-HD-NS-HD-NN-HD-HD-HD-NI-NG-NG	TAL20Xam668
Manes.02G072500.1.v7.0;pacid=41339258	22	+	0.297744	AATACCCATCTCCCGCCATTT	6.87777e-05	NI-NG-NI-NN-NI-HD-NS-NS-NN-NG-HD-NS-HD-NN-HD-HD-HD-NI-NG-NG	TAL20Xam668
Manes.01G232400.1.v7.0;pacid=41327229	146	-	0.297731	GACAAACAGGAACAGCCCATT	6.88118e-05	NI-NG-NI-NN-NI-HD-NS-NS-NN-NG-HD-NS-HD-NN-HD-HD-HD-NI-NG-NG	TAL20Xam668
Manes.17G068400.1.v7.0;pacid=41330830	356	-	0.297718	CAGAGACAGCTCACGCTCAGC	6.88438e-05	NI-NG-NI-NN-NI-HD-NS-NS-NN-NG-HD-NS-HD-NN-HD-HD-HD-NI-NG-NG	TAL20Xam668
Manes.15G094000.1.v7.0;pacid=41307217	72	+	0.297709	TATAGCTTGGTTACACCCACG	6.88693e-05	NI-NG-NI-NN-NI-HD-NS-NS-NN-NG-HD-NS-HD-NN-HD-HD-HD-NI-NG-NG	TAL20Xam668
Manes.13G087200.1.v7.0;pacid=41337769	267	+	0.297705	TATGAGAATGACACACCAATT	6.88788e-05	NI-NG-NI-NN-NI-HD-NS-NS-NN-NG-HD-NS-HD-NN-HD-HD-HD-NI-NG-NG	TAL20Xam668
Manes.13G087200.2.v7.0;pacid=41337770	267	+	0.297705	TATGAGAATGACACACCAATT	6.88788e-05	NI-NG-NI-NN-NI-HD-NS-NS-NN-NG-HD-NS-HD-NN-HD-HD-HD-NI-NG-NG	TAL20Xam668
Manes.14G040500.1.v7.0;pacid=41332023	245	+	0.297698	TATATACTTGTTGCACCGCCT	6.88958e-05	NI-NG-NI-NN-NI-HD-NS-NS-NN-NG-HD-NS-HD-NN-HD-HD-HD-NI-NG-NG	TAL20Xam668
Manes.07G127600.1.v7.0;pacid=41327799	94	-	0.297688	TCTTTACTAGCACAGCCCATT	6.89238e-05	NI-NG-NI-NN-NI-HD-NS-NS-NN-NG-HD-NS-HD-NN-HD-HD-HD-NI-NG-NG	TAL20Xam668
Manes.06G091400.1.v7.0;pacid=41304488	338	+	0.297677	AATACAAAGGCTTCGCCAATT	6.89522e-05	NI-NG-NI-NN-NI-HD-NS-NS-NN-NG-HD-NS-HD-NN-HD-HD-HD-NI-NG-NG	TAL20Xam668
Manes.06G091400.2.v7.0;pacid=41304489	338	+	0.297677	AATACAAAGGCTTCGCCAATT	6.89522e-05	NI-NG-NI-NN-NI-HD-NS-NS-NN-NG-HD-NS-HD-NN-HD-HD-HD-NI-NG-NG	TAL20Xam668
Manes.06G104400.1.v7.0;pacid=41302748	13	+	0.297676	CATCCACGGATACCACCCTCT	6.89556e-05	NI-NG-NI-NN-NI-HD-NS-NS-NN-NG-HD-NS-HD-NN-HD-HD-HD-NI-NG-NG	TAL20Xam668
Manes.08G155400.1.v7.0;pacid=41312972	258	+	0.297647	TATATAACACTTGTGCTCATT	6.90318e-05	NI-NG-NI-NN-NI-HD-NS-NS-NN-NG-HD-NS-HD-NN-HD-HD-HD-NI-NG-NG	TAL20Xam668
Manes.07G051500.1.v7.0;pacid=41327952	180	+	0.297645	CAAAACCCCATCTCTCCCTTT	6.90354e-05	NI-NG-NI-NN-NI-HD-NS-NS-NN-NG-HD-NS-HD-NN-HD-HD-HD-NI-NG-NG	TAL20Xam668
Manes.02G011700.1.v7.0;pacid=41339289	252	+	0.297605	TAGACACATGCCAAGCCCAAG	6.91402e-05	NI-NG-NI-NN-NI-HD-NS-NS-NN-NG-HD-NS-HD-NN-HD-HD-HD-NI-NG-NG	TAL20Xam668
Manes.01G239400.1.v7.0;pacid=41326438	38	+	0.297591	CAGAGAAGAATTTCATCCATT	6.91769e-05	NI-NG-NI-NN-NI-HD-NS-NS-NN-NG-HD-NS-HD-NN-HD-HD-HD-NI-NG-NG	TAL20Xam668
Manes.01G211800.2.v7.0;pacid=41325882	96	-	0.29758	ATTAGTCCCGTCTCCCCCGTT	6.92065e-05	NI-NG-NI-NN-NI-HD-NS-NS-NN-NG-HD-NS-HD-NN-HD-HD-HD-NI-NG-NG	TAL20Xam668
Manes.18G110800.1.v7.0;pacid=41334286	230	+	0.29758	TATTCACTGGTTCCTCCAAAT	6.92073e-05	NI-NG-NI-NN-NI-HD-NS-NS-NN-NG-HD-NS-HD-NN-HD-HD-HD-NI-NG-NG	TAL20Xam668
Manes.16G129900.1.v7.0;pacid=41319732	57	+	0.297556	TACAAAAAAATAATACACATT	6.9269e-05	NI-NG-NI-NN-NI-HD-NS-NS-NN-NG-HD-NS-HD-NN-HD-HD-HD-NI-NG-NG	TAL20Xam668
Manes.11G032500.1.v7.0;pacid=41317826	224	+	0.29754	TAAACAAATTTCCCACCAATC	6.93109e-05	NI-NG-NI-NN-NI-HD-NS-NS-NN-NG-HD-NS-HD-NN-HD-HD-HD-NI-NG-NG	TAL20Xam668
Manes.02G187700.1.v7.0;pacid=41341612	238	-	0.29754	TATAGGACAAAAATACCCATT	6.93111e-05	NI-NG-NI-NN-NI-HD-NS-NS-NN-NG-HD-NS-HD-NN-HD-HD-HD-NI-NG-NG	TAL20Xam668
Manes.16G005600.1.v7.0;pacid=41319792	159	+	0.297512	TATGGAAGAGCCACAACCAGA	6.93853e-05	NI-NG-NI-NN-NI-HD-NS-NS-NN-NG-HD-NS-HD-NN-HD-HD-HD-NI-NG-NG	TAL20Xam668
Manes.03G034300.1.v7.0;pacid=41308329	214	+	0.297491	TAAATTCAATTCAATACCATT	6.94396e-05	NI-NG-NI-NN-NI-HD-NS-NS-NN-NG-HD-NS-HD-NN-HD-HD-HD-NI-NG-NG	TAL20Xam668
Manes.06G055200.1.v7.0;pacid=41303216	121	+	0.297484	CATTACCTTTTCTCACCCAAT	6.94578e-05	NI-NG-NI-NN-NI-HD-NS-NS-NN-NG-HD-NS-HD-NN-HD-HD-HD-NI-NG-NG	TAL20Xam668
Manes.03G110500.1.v7.0;pacid=41307984	198	+	0.297431	CATGCACGAGTCTCGTTCAAT	6.95994e-05	NI-NG-NI-NN-NI-HD-NS-NS-NN-NG-HD-NS-HD-NN-HD-HD-HD-NI-NG-NG	TAL20Xam668
Manes.03G110500.2.v7.0;pacid=41307985	198	+	0.297431	CATGCACGAGTCTCGTTCAAT	6.95994e-05	NI-NG-NI-NN-NI-HD-NS-NS-NN-NG-HD-NS-HD-NN-HD-HD-HD-NI-NG-NG	TAL20Xam668
Manes.01G250300.1.v7.0;pacid=41325264	119	-	0.297419	TATGCAATAATCCTGCTCATT	6.96307e-05	NI-NG-NI-NN-NI-HD-NS-NS-NN-NG-HD-NS-HD-NN-HD-HD-HD-NI-NG-NG	TAL20Xam668
Manes.14G124800.1.v7.0;pacid=41331639	290	-	0.297353	ACTAGAAAAACCCCACCCAAT	6.98038e-05	NI-NG-NI-NN-NI-HD-NS-NS-NN-NG-HD-NS-HD-NN-HD-HD-HD-NI-NG-NG	TAL20Xam668
Manes.18G140700.1.v7.0;pacid=41334345	213	-	0.297346	TAATGACTCTTCACACTCATC	6.98236e-05	NI-NG-NI-NN-NI-HD-NS-NS-NN-NG-HD-NS-HD-NN-HD-HD-HD-NI-NG-NG	TAL20Xam668
Manes.09G017600.1.v7.0;pacid=41310871	286	+	0.297342	TATAAAAACAGAGTAACCATT	6.98332e-05	NI-NG-NI-NN-NI-HD-NS-NS-NN-NG-HD-NS-HD-NN-HD-HD-HD-NI-NG-NG	TAL20Xam668
Manes.09G061700.1.v7.0;pacid=41313716	68	-	0.297321	TATATAAATCTCACAAACTTT	6.98879e-05	NI-NG-NI-NN-NI-HD-NS-NS-NN-NG-HD-NS-HD-NN-HD-HD-HD-NI-NG-NG	TAL20Xam668
Manes.02G032800.1.v7.0;pacid=41339912	224	+	0.297312	CATTCAAAACTCCCGCAAATT	6.9912e-05	NI-NG-NI-NN-NI-HD-NS-NS-NN-NG-HD-NS-HD-NN-HD-HD-HD-NI-NG-NG	TAL20Xam668
Manes.04G132800.1.v7.0;pacid=41314764	255	+	0.2973	CATTTACTCATACCTCCCCTT	6.99446e-05	NI-NG-NI-NN-NI-HD-NS-NS-NN-NG-HD-NS-HD-NN-HD-HD-HD-NI-NG-NG	TAL20Xam668
Manes.18G076000.1.v7.0;pacid=41334285	197	-	0.297294	TATAGACCAGAAAAAGCCAAT	6.99599e-05	NI-NG-NI-NN-NI-HD-NS-NS-NN-NG-HD-NS-HD-NN-HD-HD-HD-NI-NG-NG	TAL20Xam668
Manes.08G001500.1.v7.0;pacid=41313239	190	-	0.297281	TATTGACTCCTAATTCCCAAT	6.99945e-05	NI-NG-NI-NN-NI-HD-NS-NS-NN-NG-HD-NS-HD-NN-HD-HD-HD-NI-NG-NG	TAL20Xam668
Manes.10G048100.1.v7.0;pacid=41321294	261	+	0.29726	AAAAGAACTGTCTTGTCCATT	7.00508e-05	NI-NG-NI-NN-NI-HD-NS-NS-NN-NG-HD-NS-HD-NN-HD-HD-HD-NI-NG-NG	TAL20Xam668
Manes.04G151400.1.v7.0;pacid=41316317	291	-	0.297252	TCTAGCCAGCTAACACACTTT	7.00713e-05	NI-NG-NI-NN-NI-HD-NS-NS-NN-NG-HD-NS-HD-NN-HD-HD-HD-NI-NG-NG	TAL20Xam668
Manes.18G047600.3.v7.0;pacid=41333878	110	+	0.297213	CACAACTGGGTCAGGCCCATT	7.01764e-05	NI-NG-NI-NN-NI-HD-NS-NS-NN-NG-HD-NS-HD-NN-HD-HD-HD-NI-NG-NG	TAL20Xam668
Manes.07G084200.1.v7.0;pacid=41327603	142	-	0.297198	CATGGTCCCTCCCCTCCCATT	7.02154e-05	NI-NG-NI-NN-NI-HD-NS-NS-NN-NG-HD-NS-HD-NN-HD-HD-HD-NI-NG-NG	TAL20Xam668
Manes.11G111800.1.v7.0;pacid=41317036	141	-	0.297148	TATATACCAGATTCACCCCTA	7.035e-05	NI-NG-NI-NN-NI-HD-NS-NS-NN-NG-HD-NS-HD-NN-HD-HD-HD-NI-NG-NG	TAL20Xam668
Manes.09G144300.1.v7.0;pacid=41311995	259	+	0.297145	CCGCCACTTCTCCCACCCATT	7.03567e-05	NI-NG-NI-NN-NI-HD-NS-NS-NN-NG-HD-NS-HD-NN-HD-HD-HD-NI-NG-NG	TAL20Xam668
Manes.03G165700.1.v7.0;pacid=41308838	199	+	0.297133	TCAAAACCCAACTCATCCATT	7.0388e-05	NI-NG-NI-NN-NI-HD-NS-NS-NN-NG-HD-NS-HD-NN-HD-HD-HD-NI-NG-NG	TAL20Xam668
Manes.04G031600.1.v7.0;pacid=41315551	86	+	0.297132	CCTAAACAACCCACAACCGTT	7.03902e-05	NI-NG-NI-NN-NI-HD-NS-NS-NN-NG-HD-NS-HD-NN-HD-HD-HD-NI-NG-NG	TAL20Xam668
Manes.04G026300.3.v7.0;pacid=41315747	20	-	0.297126	TATGAACAAGCAATACCCATC	7.04062e-05	NI-NG-NI-NN-NI-HD-NS-NS-NN-NG-HD-NS-HD-NN-HD-HD-HD-NI-NG-NG	TAL20Xam668
Manes.12G023500.1.v7.0;pacid=41323262	77	+	0.297124	TTTAAACACATATAAACCATA	7.04121e-05	NI-NG-NI-NN-NI-HD-NS-NS-NN-NG-HD-NS-HD-NN-HD-HD-HD-NI-NG-NG	TAL20Xam668
Manes.17G048700.1.v7.0;pacid=41329916	118	-	0.297099	TATTCAAAACTTGCACCCTTT	7.04795e-05	NI-NG-NI-NN-NI-HD-NS-NS-NN-NG-HD-NS-HD-NN-HD-HD-HD-NI-NG-NG	TAL20Xam668
Manes.01G130000.1.v7.0;pacid=41325308	251	+	0.297066	TCTACACAACACAAGCCCCTC	7.05683e-05	NI-NG-NI-NN-NI-HD-NS-NS-NN-NG-HD-NS-HD-NN-HD-HD-HD-NI-NG-NG	TAL20Xam668
Manes.13G010200.1.v7.0;pacid=41338008	204	+	0.297064	CTTGAACGGAACTCGCACATT	7.0572e-05	NI-NG-NI-NN-NI-HD-NS-NS-NN-NG-HD-NS-HD-NN-HD-HD-HD-NI-NG-NG	TAL20Xam668
Manes.04G070500.1.v7.0;pacid=41315258	255	+	0.297061	TATGACATTATCAAGCCAATT	7.05801e-05	NI-NG-NI-NN-NI-HD-NS-NS-NN-NG-HD-NS-HD-NN-HD-HD-HD-NI-NG-NG	TAL20Xam668
Manes.05G040100.1.v7.0;pacid=41334944	240	-	0.297049	TACACACGAGTCCAACCCCCA	7.06123e-05	NI-NG-NI-NN-NI-HD-NS-NS-NN-NG-HD-NS-HD-NN-HD-HD-HD-NI-NG-NG	TAL20Xam668
Manes.03G043300.1.v7.0;pacid=41309039	133	+	0.297045	TATAAAATATTTTAACTCATT	7.06229e-05	NI-NG-NI-NN-NI-HD-NS-NS-NN-NG-HD-NS-HD-NN-HD-HD-HD-NI-NG-NG	TAL20Xam668
Manes.14G135100.1.v7.0;pacid=41331912	280	+	0.297016	TAGAGAAAAGTCGCAGCAAAT	7.07005e-05	NI-NG-NI-NN-NI-HD-NS-NS-NN-NG-HD-NS-HD-NN-HD-HD-HD-NI-NG-NG	TAL20Xam668
Manes.14G135100.2.v7.0;pacid=41331913	280	+	0.297016	TAGAGAAAAGTCGCAGCAAAT	7.07005e-05	NI-NG-NI-NN-NI-HD-NS-NS-NN-NG-HD-NS-HD-NN-HD-HD-HD-NI-NG-NG	TAL20Xam668
Manes.14G135100.3.v7.0;pacid=41331914	280	+	0.297016	TAGAGAAAAGTCGCAGCAAAT	7.07005e-05	NI-NG-NI-NN-NI-HD-NS-NS-NN-NG-HD-NS-HD-NN-HD-HD-HD-NI-NG-NG	TAL20Xam668
Manes.12G120400.1.v7.0;pacid=41323135	107	-	0.296965	TCTAGTCCGAACTCGATCATT	7.0837e-05	NI-NG-NI-NN-NI-HD-NS-NS-NN-NG-HD-NS-HD-NN-HD-HD-HD-NI-NG-NG	TAL20Xam668
Manes.12G120400.2.v7.0;pacid=41323136	107	-	0.296965	TCTAGTCCGAACTCGATCATT	7.0837e-05	NI-NG-NI-NN-NI-HD-NS-NS-NN-NG-HD-NS-HD-NN-HD-HD-HD-NI-NG-NG	TAL20Xam668
Manes.13G019400.1.v7.0;pacid=41337593	34	+	0.296963	AACATAACCGACCAGCCCATT	7.08429e-05	NI-NG-NI-NN-NI-HD-NS-NS-NN-NG-HD-NS-HD-NN-HD-HD-HD-NI-NG-NG	TAL20Xam668
Manes.04G006400.1.v7.0;pacid=41316402	220	-	0.296934	TATATAGAGGTCTCTTCAATT	7.09217e-05	NI-NG-NI-NN-NI-HD-NS-NS-NN-NG-HD-NS-HD-NN-HD-HD-HD-NI-NG-NG	TAL20Xam668
Manes.13G099800.1.v7.0;pacid=41338731	12	-	0.296923	AACACGCGAATCCCACCAATT	7.09503e-05	NI-NG-NI-NN-NI-HD-NS-NS-NN-NG-HD-NS-HD-NN-HD-HD-HD-NI-NG-NG	TAL20Xam668
Manes.07G066700.1.v7.0;pacid=41328918	204	+	0.29692	TCTTAAACCCTAAAACCCATT	7.09604e-05	NI-NG-NI-NN-NI-HD-NS-NS-NN-NG-HD-NS-HD-NN-HD-HD-HD-NI-NG-NG	TAL20Xam668
Manes.07G066700.2.v7.0;pacid=41328919	204	+	0.29692	TCTTAAACCCTAAAACCCATT	7.09604e-05	NI-NG-NI-NN-NI-HD-NS-NS-NN-NG-HD-NS-HD-NN-HD-HD-HD-NI-NG-NG	TAL20Xam668
Manes.09G067800.1.v7.0;pacid=41311522	91	+	0.296892	TATAGAAAATTCACAATAAGT	7.10357e-05	NI-NG-NI-NN-NI-HD-NS-NS-NN-NG-HD-NS-HD-NN-HD-HD-HD-NI-NG-NG	TAL20Xam668
Manes.08G109300.1.v7.0;pacid=41312799	131	+	0.296889	TAAATACCCCCCCAACCCATC	7.10413e-05	NI-NG-NI-NN-NI-HD-NS-NS-NN-NG-HD-NS-HD-NN-HD-HD-HD-NI-NG-NG	TAL20Xam668
Manes.15G087300.1.v7.0;pacid=41306564	295	-	0.296809	ATTTGACCCGACACGCCCATG	7.12582e-05	NI-NG-NI-NN-NI-HD-NS-NS-NN-NG-HD-NS-HD-NN-HD-HD-HD-NI-NG-NG	TAL20Xam668
Manes.07G137400.1.v7.0;pacid=41327543	43	+	0.296808	TTTAATCCAAGACCTCCCATT	7.12615e-05	NI-NG-NI-NN-NI-HD-NS-NS-NN-NG-HD-NS-HD-NN-HD-HD-HD-NI-NG-NG	TAL20Xam668
Manes.08G104400.1.v7.0;pacid=41313714	105	+	0.29679	TATACACCCACCAACCTCATC	7.13099e-05	NI-NG-NI-NN-NI-HD-NS-NS-NN-NG-HD-NS-HD-NN-HD-HD-HD-NI-NG-NG	TAL20Xam668
Manes.01G199600.1.v7.0;pacid=41325859	175	+	0.29679	TATATACACCTCTCGGCTTTT	7.13102e-05	NI-NG-NI-NN-NI-HD-NS-NS-NN-NG-HD-NS-HD-NN-HD-HD-HD-NI-NG-NG	TAL20Xam668
Manes.02G000400.1.v7.0;pacid=41340993	191	+	0.296788	TATCAACCATTAACTCCTACT	7.13137e-05	NI-NG-NI-NN-NI-HD-NS-NS-NN-NG-HD-NS-HD-NN-HD-HD-HD-NI-NG-NG	TAL20Xam668
Manes.09G040300.1.v7.0;pacid=41311738	73	+	0.29677	TCCAGACCAATTCAACCAATT	7.13632e-05	NI-NG-NI-NN-NI-HD-NS-NS-NN-NG-HD-NS-HD-NN-HD-HD-HD-NI-NG-NG	TAL20Xam668
Manes.07G007700.1.v7.0;pacid=41328076	78	-	0.296766	TATAGACTAATCTATTCCTAT	7.13747e-05	NI-NG-NI-NN-NI-HD-NS-NS-NN-NG-HD-NS-HD-NN-HD-HD-HD-NI-NG-NG	TAL20Xam668
Manes.15G008800.1.v7.0;pacid=41304937	352	+	0.296733	CAAATAAACATCCTCCCCATT	7.14623e-05	NI-NG-NI-NN-NI-HD-NS-NS-NN-NG-HD-NS-HD-NN-HD-HD-HD-NI-NG-NG	TAL20Xam668
Manes.14G024700.1.v7.0;pacid=41332347	91	+	0.29673	TATAATCGAGTACACCCCTTA	7.14714e-05	NI-NG-NI-NN-NI-HD-NS-NS-NN-NG-HD-NS-HD-NN-HD-HD-HD-NI-NG-NG	TAL20Xam668
Manes.18G019700.1.v7.0;pacid=41333547	156	-	0.296712	TTTAAAAATGTCGCAATCAAT	7.15198e-05	NI-NG-NI-NN-NI-HD-NS-NS-NN-NG-HD-NS-HD-NN-HD-HD-HD-NI-NG-NG	TAL20Xam668
Manes.15G066000.1.v7.0;pacid=41305580	328	+	0.296709	TCTGCTCAATTCGCACCCTTT	7.15288e-05	NI-NG-NI-NN-NI-HD-NS-NS-NN-NG-HD-NS-HD-NN-HD-HD-HD-NI-NG-NG	TAL20Xam668
Manes.05G183900.1.v7.0;pacid=41336677	67	+	0.296668	TATATATCTCTCCCCCCAATA	7.16395e-05	NI-NG-NI-NN-NI-HD-NS-NS-NN-NG-HD-NS-HD-NN-HD-HD-HD-NI-NG-NG	TAL20Xam668
Manes.13G138500.1.v7.0;pacid=41338622	176	-	0.296655	GAAAGAATCCTCTAACCCATT	7.16736e-05	NI-NG-NI-NN-NI-HD-NS-NS-NN-NG-HD-NS-HD-NN-HD-HD-HD-NI-NG-NG	TAL20Xam668
Manes.02G223700.1.v7.0;pacid=41339223	248	-	0.296646	AATAAACTAGTTTATCACATT	7.16997e-05	NI-NG-NI-NN-NI-HD-NS-NS-NN-NG-HD-NS-HD-NN-HD-HD-HD-NI-NG-NG	TAL20Xam668
Manes.08G137800.1.v7.0;pacid=41314156	183	+	0.296642	TTTATAACACTCACTAACATT	7.17097e-05	NI-NG-NI-NN-NI-HD-NS-NS-NN-NG-HD-NS-HD-NN-HD-HD-HD-NI-NG-NG	TAL20Xam668
Manes.15G164200.1.v7.0;pacid=41307197	282	+	0.296602	TACAGGTCAGTCCCACCCAGC	7.18198e-05	NI-NG-NI-NN-NI-HD-NS-NS-NN-NG-HD-NS-HD-NN-HD-HD-HD-NI-NG-NG	TAL20Xam668
Manes.03G117000.1.v7.0;pacid=41307602	196	+	0.296572	TTTATTTAATTCTCTCCCATT	7.18988e-05	NI-NG-NI-NN-NI-HD-NS-NS-NN-NG-HD-NS-HD-NN-HD-HD-HD-NI-NG-NG	TAL20Xam668
Manes.09G171400.1.v7.0;pacid=41311025	184	+	0.296552	TCTAAACTAGTAGATCTCAAT	7.19535e-05	NI-NG-NI-NN-NI-HD-NS-NS-NN-NG-HD-NS-HD-NN-HD-HD-HD-NI-NG-NG	TAL20Xam668
Manes.09G171400.2.v7.0;pacid=41311026	184	+	0.296552	TCTAAACTAGTAGATCTCAAT	7.19535e-05	NI-NG-NI-NN-NI-HD-NS-NS-NN-NG-HD-NS-HD-NN-HD-HD-HD-NI-NG-NG	TAL20Xam668
Manes.09G171400.3.v7.0;pacid=41311027	184	+	0.296552	TCTAAACTAGTAGATCTCAAT	7.19535e-05	NI-NG-NI-NN-NI-HD-NS-NS-NN-NG-HD-NS-HD-NN-HD-HD-HD-NI-NG-NG	TAL20Xam668
Manes.09G171400.4.v7.0;pacid=41311028	184	+	0.296552	TCTAAACTAGTAGATCTCAAT	7.19535e-05	NI-NG-NI-NN-NI-HD-NS-NS-NN-NG-HD-NS-HD-NN-HD-HD-HD-NI-NG-NG	TAL20Xam668
Manes.02G023200.1.v7.0;pacid=41339800	110	+	0.296539	GATTAAATAGTCCCTCCAATT	7.1991e-05	NI-NG-NI-NN-NI-HD-NS-NS-NN-NG-HD-NS-HD-NN-HD-HD-HD-NI-NG-NG	TAL20Xam668
Manes.03G198400.1.v7.0;pacid=41309358	265	+	0.296482	TTTAGACAATTCACAAAAATC	7.21441e-05	NI-NG-NI-NN-NI-HD-NS-NS-NN-NG-HD-NS-HD-NN-HD-HD-HD-NI-NG-NG	TAL20Xam668
Manes.05G082400.1.v7.0;pacid=41336849	171	+	0.296474	CACAGCCGCATCACTCTCACT	7.21669e-05	NI-NG-NI-NN-NI-HD-NS-NS-NN-NG-HD-NS-HD-NN-HD-HD-HD-NI-NG-NG	TAL20Xam668
Manes.13G123200.1.v7.0;pacid=41337814	139	+	0.296462	TATATACTCCTAGTGTCCCTT	7.22007e-05	NI-NG-NI-NN-NI-HD-NS-NS-NN-NG-HD-NS-HD-NN-HD-HD-HD-NI-NG-NG	TAL20Xam668
Manes.15G078000.1.v7.0;pacid=41306832	175	+	0.296446	TAAAGACAAGTCGGACCCCAC	7.22449e-05	NI-NG-NI-NN-NI-HD-NS-NS-NN-NG-HD-NS-HD-NN-HD-HD-HD-NI-NG-NG	TAL20Xam668
Manes.06G083400.1.v7.0;pacid=41303740	151	-	0.296411	TATAAATTAATCAATATCATT	7.23386e-05	NI-NG-NI-NN-NI-HD-NS-NS-NN-NG-HD-NS-HD-NN-HD-HD-HD-NI-NG-NG	TAL20Xam668
Manes.08G033900.1.v7.0;pacid=41312988	198	-	0.296405	CATCCACATGTCAAATCCAAT	7.23568e-05	NI-NG-NI-NN-NI-HD-NS-NS-NN-NG-HD-NS-HD-NN-HD-HD-HD-NI-NG-NG	TAL20Xam668
Manes.05G150100.1.v7.0;pacid=41336762	196	+	0.29638	TATAGAGACATCTCAACTAGT	7.24238e-05	NI-NG-NI-NN-NI-HD-NS-NS-NN-NG-HD-NS-HD-NN-HD-HD-HD-NI-NG-NG	TAL20Xam668
Manes.05G188300.1.v7.0;pacid=41335864	150	+	0.296363	TAAAGCCCAAACACGTCCTTT	7.24716e-05	NI-NG-NI-NN-NI-HD-NS-NS-NN-NG-HD-NS-HD-NN-HD-HD-HD-NI-NG-NG	TAL20Xam668
Manes.09G062600.1.v7.0;pacid=41310270	18	+	0.296297	AGGAAACAAATCCCACTCATT	7.26526e-05	NI-NG-NI-NN-NI-HD-NS-NS-NN-NG-HD-NS-HD-NN-HD-HD-HD-NI-NG-NG	TAL20Xam668
Manes.08G014800.1.v7.0;pacid=41313060	40	+	0.296261	AAGAGAACTCTCCCCCACATT	7.27512e-05	NI-NG-NI-NN-NI-HD-NS-NS-NN-NG-HD-NS-HD-NN-HD-HD-HD-NI-NG-NG	TAL20Xam668
Manes.17G010500.1.v7.0;pacid=41329933	230	+	0.296232	TGTGAACTTGTCACTCCCAAG	7.28316e-05	NI-NG-NI-NN-NI-HD-NS-NS-NN-NG-HD-NS-HD-NN-HD-HD-HD-NI-NG-NG	TAL20Xam668
Manes.05G048200.1.v7.0;pacid=41335996	0	-	0.296209	TATAAACAGAAACAGCCATTT	7.28928e-05	NI-NG-NI-NN-NI-HD-NS-NS-NN-NG-HD-NS-HD-NN-HD-HD-HD-NI-NG-NG	TAL20Xam668
Manes.05G147700.1.v7.0;pacid=41334777	359	+	0.29618	TATGCACACTTTCTCCCCATT	7.29733e-05	NI-NG-NI-NN-NI-HD-NS-NS-NN-NG-HD-NS-HD-NN-HD-HD-HD-NI-NG-NG	TAL20Xam668
Manes.05G104400.1.v7.0;pacid=41336751	78	-	0.296159	TATAAAAATTTCAACCCACTT	7.30329e-05	NI-NG-NI-NN-NI-HD-NS-NS-NN-NG-HD-NS-HD-NN-HD-HD-HD-NI-NG-NG	TAL20Xam668
Manes.05G128800.1.v7.0;pacid=41336588	207	+	0.296153	CATTCACTCGTTCCTTCCATT	7.30496e-05	NI-NG-NI-NN-NI-HD-NS-NS-NN-NG-HD-NS-HD-NN-HD-HD-HD-NI-NG-NG	TAL20Xam668
Manes.04G162500.1.v7.0;pacid=41315905	265	+	0.296125	TCAATACTTGTAGAGTCCATT	7.31269e-05	NI-NG-NI-NN-NI-HD-NS-NS-NN-NG-HD-NS-HD-NN-HD-HD-HD-NI-NG-NG	TAL20Xam668
Manes.04G163100.1.v7.0;pacid=41314786	62	+	0.296123	CACAAATGGGTCACATGCATT	7.3132e-05	NI-NG-NI-NN-NI-HD-NS-NS-NN-NG-HD-NS-HD-NN-HD-HD-HD-NI-NG-NG	TAL20Xam668
Manes.14G133000.1.v7.0;pacid=41331563	38	+	0.296122	TTTAAAAAATTCAAAACAATT	7.31355e-05	NI-NG-NI-NN-NI-HD-NS-NS-NN-NG-HD-NS-HD-NN-HD-HD-HD-NI-NG-NG	TAL20Xam668
Manes.14G133000.2.v7.0;pacid=41331564	38	+	0.296122	TTTAAAAAATTCAAAACAATT	7.31355e-05	NI-NG-NI-NN-NI-HD-NS-NS-NN-NG-HD-NS-HD-NN-HD-HD-HD-NI-NG-NG	TAL20Xam668
Manes.02G123600.1.v7.0;pacid=41340110	195	+	0.296106	TCTCGTCCCTCCTCCCCCATT	7.31783e-05	NI-NG-NI-NN-NI-HD-NS-NS-NN-NG-HD-NS-HD-NN-HD-HD-HD-NI-NG-NG	TAL20Xam668
Manes.02G134400.1.v7.0;pacid=41341126	11	+	0.296102	TAAATAAAATTCACATCCATA	7.31895e-05	NI-NG-NI-NN-NI-HD-NS-NS-NN-NG-HD-NS-HD-NN-HD-HD-HD-NI-NG-NG	TAL20Xam668
Manes.01G051000.1.v7.0;pacid=41326123	32	+	0.296091	TATAAATACTTAACACGAATT	7.32191e-05	NI-NG-NI-NN-NI-HD-NS-NS-NN-NG-HD-NS-HD-NN-HD-HD-HD-NI-NG-NG	TAL20Xam668
Manes.06G173300.1.v7.0;pacid=41304763	173	+	0.296068	TATAGTAGTTTCTAGTCCACT	7.32837e-05	NI-NG-NI-NN-NI-HD-NS-NS-NN-NG-HD-NS-HD-NN-HD-HD-HD-NI-NG-NG	TAL20Xam668
Manes.10G005400.1.v7.0;pacid=41321633	58	+	0.29605	TTCCGACGGAGCTCGCCCTTT	7.33324e-05	NI-NG-NI-NN-NI-HD-NS-NS-NN-NG-HD-NS-HD-NN-HD-HD-HD-NI-NG-NG	TAL20Xam668
Manes.10G005400.2.v7.0;pacid=41321634	58	+	0.29605	TTCCGACGGAGCTCGCCCTTT	7.33324e-05	NI-NG-NI-NN-NI-HD-NS-NS-NN-NG-HD-NS-HD-NN-HD-HD-HD-NI-NG-NG	TAL20Xam668
Manes.03G038100.1.v7.0;pacid=41308668	183	+	0.29603	TTTCGACGATTAGCACCTCTT	7.33897e-05	NI-NG-NI-NN-NI-HD-NS-NS-NN-NG-HD-NS-HD-NN-HD-HD-HD-NI-NG-NG	TAL20Xam668
Manes.04G091300.1.v7.0;pacid=41315336	198	+	0.295997	TCTATAAATAACACCCCCAAT	7.34803e-05	NI-NG-NI-NN-NI-HD-NS-NS-NN-NG-HD-NS-HD-NN-HD-HD-HD-NI-NG-NG	TAL20Xam668
Manes.01G167000.1.v7.0;pacid=41327205	219	+	0.295989	CATCAGCAATTCACAACCACT	7.35036e-05	NI-NG-NI-NN-NI-HD-NS-NS-NN-NG-HD-NS-HD-NN-HD-HD-HD-NI-NG-NG	TAL20Xam668
Manes.15G025900.1.v7.0;pacid=41307249	320	+	0.295965	TTGAGACTTGTCCCCCCGAGT	7.35692e-05	NI-NG-NI-NN-NI-HD-NS-NS-NN-NG-HD-NS-HD-NN-HD-HD-HD-NI-NG-NG	TAL20Xam668
Manes.S036500.1.v7.0;pacid=41316518	148	-	0.295941	TGTCGTCTGGTAACTCCCATA	7.36373e-05	NI-NG-NI-NN-NI-HD-NS-NS-NN-NG-HD-NS-HD-NN-HD-HD-HD-NI-NG-NG	TAL20Xam668
Manes.05G149400.1.v7.0;pacid=41335454	218	+	0.29592	TTCAACCTCTTCACACCCACT	7.36942e-05	NI-NG-NI-NN-NI-HD-NS-NS-NN-NG-HD-NS-HD-NN-HD-HD-HD-NI-NG-NG	TAL20Xam668
Manes.05G140100.1.v7.0;pacid=41337137	223	-	0.295917	TATATACAGATCTTTTCCTTT	7.37045e-05	NI-NG-NI-NN-NI-HD-NS-NS-NN-NG-HD-NS-HD-NN-HD-HD-HD-NI-NG-NG	TAL20Xam668
Manes.05G150500.1.v7.0;pacid=41336806	223	-	0.295917	TATATACAGATCTTTTCCTTT	7.37045e-05	NI-NG-NI-NN-NI-HD-NS-NS-NN-NG-HD-NS-HD-NN-HD-HD-HD-NI-NG-NG	TAL20Xam668
Manes.01G069800.1.v7.0;pacid=41324730	177	+	0.295895	TACCCAAGGGTCTCACATATT	7.37645e-05	NI-NG-NI-NN-NI-HD-NS-NS-NN-NG-HD-NS-HD-NN-HD-HD-HD-NI-NG-NG	TAL20Xam668
Manes.05G153800.1.v7.0;pacid=41334805	226	+	0.29588	TAAAGATCAATCGCGTCCACA	7.38054e-05	NI-NG-NI-NN-NI-HD-NS-NS-NN-NG-HD-NS-HD-NN-HD-HD-HD-NI-NG-NG	TAL20Xam668
Manes.17G111900.1.v7.0;pacid=41329581	123	+	0.295856	CCAAAAAACGTAATGCCCATT	7.38735e-05	NI-NG-NI-NN-NI-HD-NS-NS-NN-NG-HD-NS-HD-NN-HD-HD-HD-NI-NG-NG	TAL20Xam668
Manes.08G078000.1.v7.0;pacid=41313937	237	+	0.295813	TATACTAAATTCTCACCCTAT	7.39925e-05	NI-NG-NI-NN-NI-HD-NS-NS-NN-NG-HD-NS-HD-NN-HD-HD-HD-NI-NG-NG	TAL20Xam668
Manes.07G082200.1.v7.0;pacid=41328400	37	+	0.295807	CATATAAGTATTCCTCCAATT	7.40108e-05	NI-NG-NI-NN-NI-HD-NS-NS-NN-NG-HD-NS-HD-NN-HD-HD-HD-NI-NG-NG	TAL20Xam668
Manes.03G054100.1.v7.0;pacid=41308041	241	+	0.295791	TATAGAAGGGAATCAAAGATT	7.4055e-05	NI-NG-NI-NN-NI-HD-NS-NS-NN-NG-HD-NS-HD-NN-HD-HD-HD-NI-NG-NG	TAL20Xam668
Manes.04G115800.1.v7.0;pacid=41314978	230	-	0.295786	TATATCAACTTCATGCCCATA	7.4068e-05	NI-NG-NI-NN-NI-HD-NS-NS-NN-NG-HD-NS-HD-NN-HD-HD-HD-NI-NG-NG	TAL20Xam668
Manes.01G218100.1.v7.0;pacid=41324791	259	+	0.29577	ATTATGCGCGTCAAGCCCCTT	7.41144e-05	NI-NG-NI-NN-NI-HD-NS-NS-NN-NG-HD-NS-HD-NN-HD-HD-HD-NI-NG-NG	TAL20Xam668
Manes.15G059400.1.v7.0;pacid=41305026	260	+	0.295749	TCTATCAGAAACAAACCCATT	7.41712e-05	NI-NG-NI-NN-NI-HD-NS-NS-NN-NG-HD-NS-HD-NN-HD-HD-HD-NI-NG-NG	TAL20Xam668
Manes.10G047500.1.v7.0;pacid=41321318	203	+	0.295703	GATCCAACGGCCTCTCCCATT	7.43013e-05	NI-NG-NI-NN-NI-HD-NS-NS-NN-NG-HD-NS-HD-NN-HD-HD-HD-NI-NG-NG	TAL20Xam668
Manes.06G066100.1.v7.0;pacid=41304034	30	-	0.29569	TATTAAATTATAAAAACCATT	7.43379e-05	NI-NG-NI-NN-NI-HD-NS-NS-NN-NG-HD-NS-HD-NN-HD-HD-HD-NI-NG-NG	TAL20Xam668
Manes.06G066100.2.v7.0;pacid=41304035	30	-	0.29569	TATTAAATTATAAAAACCATT	7.43379e-05	NI-NG-NI-NN-NI-HD-NS-NS-NN-NG-HD-NS-HD-NN-HD-HD-HD-NI-NG-NG	TAL20Xam668
Manes.13G075000.1.v7.0;pacid=41339125	28	+	0.295663	TACCGACAATTCAAACCTAAT	7.44134e-05	NI-NG-NI-NN-NI-HD-NS-NS-NN-NG-HD-NS-HD-NN-HD-HD-HD-NI-NG-NG	TAL20Xam668
Manes.13G075000.2.v7.0;pacid=41339126	28	+	0.295663	TACCGACAATTCAAACCTAAT	7.44134e-05	NI-NG-NI-NN-NI-HD-NS-NS-NN-NG-HD-NS-HD-NN-HD-HD-HD-NI-NG-NG	TAL20Xam668
Manes.04G006700.1.v7.0;pacid=41315926	190	+	0.295655	TTTAAAAAATTAAAACACATT	7.44369e-05	NI-NG-NI-NN-NI-HD-NS-NS-NN-NG-HD-NS-HD-NN-HD-HD-HD-NI-NG-NG	TAL20Xam668
Manes.18G053100.1.v7.0;pacid=41333430	257	+	0.295626	CGTAGACCATACAATACCATT	7.45179e-05	NI-NG-NI-NN-NI-HD-NS-NS-NN-NG-HD-NS-HD-NN-HD-HD-HD-NI-NG-NG	TAL20Xam668
Manes.10G153600.1.v7.0;pacid=41321232	69	+	0.295621	TCAAGTCAAGTCAAGTCAATT	7.45327e-05	NI-NG-NI-NN-NI-HD-NS-NS-NN-NG-HD-NS-HD-NN-HD-HD-HD-NI-NG-NG	TAL20Xam668
Manes.10G153600.2.v7.0;pacid=41321233	69	+	0.295621	TCAAGTCAAGTCAAGTCAATT	7.45327e-05	NI-NG-NI-NN-NI-HD-NS-NS-NN-NG-HD-NS-HD-NN-HD-HD-HD-NI-NG-NG	TAL20Xam668
Manes.03G092400.1.v7.0;pacid=41308690	27	-	0.295507	CAAAAACTCATCCCTACCTTT	7.48546e-05	NI-NG-NI-NN-NI-HD-NS-NS-NN-NG-HD-NS-HD-NN-HD-HD-HD-NI-NG-NG	TAL20Xam668
Manes.10G092200.1.v7.0;pacid=41320799	220	+	0.295471	CTCAGCCAATTCCCACCAATT	7.4955e-05	NI-NG-NI-NN-NI-HD-NS-NS-NN-NG-HD-NS-HD-NN-HD-HD-HD-NI-NG-NG	TAL20Xam668
Manes.05G134100.1.v7.0;pacid=41335586	278	+	0.295458	TATAGCATTGTCCCATCATTT	7.49927e-05	NI-NG-NI-NN-NI-HD-NS-NS-NN-NG-HD-NS-HD-NN-HD-HD-HD-NI-NG-NG	TAL20Xam668
Manes.15G002400.1.v7.0;pacid=41305009	205	+	0.295413	CTTAAACATCTCACCCATATT	7.51204e-05	NI-NG-NI-NN-NI-HD-NS-NS-NN-NG-HD-NS-HD-NN-HD-HD-HD-NI-NG-NG	TAL20Xam668
Manes.03G025900.1.v7.0;pacid=41309494	251	+	0.295387	TAAAGCCTAGTAAAACACACT	7.51928e-05	NI-NG-NI-NN-NI-HD-NS-NS-NN-NG-HD-NS-HD-NN-HD-HD-HD-NI-NG-NG	TAL20Xam668
Manes.01G009800.1.v7.0;pacid=41326271	168	+	0.295382	TATACATCACACTCAAACATT	7.52088e-05	NI-NG-NI-NN-NI-HD-NS-NS-NN-NG-HD-NS-HD-NN-HD-HD-HD-NI-NG-NG	TAL20Xam668
Manes.11G139600.1.v7.0;pacid=41317295	79	+	0.295372	TTTAAAAACCTCACTCCATTT	7.52368e-05	NI-NG-NI-NN-NI-HD-NS-NS-NN-NG-HD-NS-HD-NN-HD-HD-HD-NI-NG-NG	TAL20Xam668
Manes.11G139600.2.v7.0;pacid=41317296	79	+	0.295372	TTTAAAAACCTCACTCCATTT	7.52368e-05	NI-NG-NI-NN-NI-HD-NS-NS-NN-NG-HD-NS-HD-NN-HD-HD-HD-NI-NG-NG	TAL20Xam668
Manes.11G139600.3.v7.0;pacid=41317297	79	+	0.295372	TTTAAAAACCTCACTCCATTT	7.52368e-05	NI-NG-NI-NN-NI-HD-NS-NS-NN-NG-HD-NS-HD-NN-HD-HD-HD-NI-NG-NG	TAL20Xam668
Manes.11G139600.4.v7.0;pacid=41317298	79	+	0.295372	TTTAAAAACCTCACTCCATTT	7.52368e-05	NI-NG-NI-NN-NI-HD-NS-NS-NN-NG-HD-NS-HD-NN-HD-HD-HD-NI-NG-NG	TAL20Xam668
Manes.05G053600.1.v7.0;pacid=41336265	282	+	0.295368	TATGCTACGATTACTCCCATT	7.52464e-05	NI-NG-NI-NN-NI-HD-NS-NS-NN-NG-HD-NS-HD-NN-HD-HD-HD-NI-NG-NG	TAL20Xam668
Manes.15G060000.1.v7.0;pacid=41305552	177	-	0.295361	TACAAACATGGCTCTCCAACT	7.52665e-05	NI-NG-NI-NN-NI-HD-NS-NS-NN-NG-HD-NS-HD-NN-HD-HD-HD-NI-NG-NG	TAL20Xam668
Manes.02G091100.2.v7.0;pacid=41339596	403	-	0.295345	TATTGCCAAGTCACACTTTTT	7.53123e-05	NI-NG-NI-NN-NI-HD-NS-NS-NN-NG-HD-NS-HD-NN-HD-HD-HD-NI-NG-NG	TAL20Xam668
Manes.13G114300.1.v7.0;pacid=41337412	172	+	0.295342	CAAATACGCTTCTCACCAATC	7.5321e-05	NI-NG-NI-NN-NI-HD-NS-NS-NN-NG-HD-NS-HD-NN-HD-HD-HD-NI-NG-NG	TAL20Xam668
Manes.01G060800.1.v7.0;pacid=41324682	239	-	0.295341	TATAGACTAAACCAGATCGTT	7.53247e-05	NI-NG-NI-NN-NI-HD-NS-NS-NN-NG-HD-NS-HD-NN-HD-HD-HD-NI-NG-NG	TAL20Xam668
Manes.18G141700.1.v7.0;pacid=41333551	254	+	0.295302	CACAGAAGCATCACTCTCTTT	7.54337e-05	NI-NG-NI-NN-NI-HD-NS-NS-NN-NG-HD-NS-HD-NN-HD-HD-HD-NI-NG-NG	TAL20Xam668
Manes.13G115000.1.v7.0;pacid=41338359	195	+	0.2953	TCTAGATCAATCAAACCCGTC	7.54413e-05	NI-NG-NI-NN-NI-HD-NS-NS-NN-NG-HD-NS-HD-NN-HD-HD-HD-NI-NG-NG	TAL20Xam668
Manes.09G143000.1.v7.0;pacid=41310719	384	+	0.29528	TATCATATGCTCTCTCCAATT	7.54977e-05	NI-NG-NI-NN-NI-HD-NS-NS-NN-NG-HD-NS-HD-NN-HD-HD-HD-NI-NG-NG	TAL20Xam668
Manes.07G036400.1.v7.0;pacid=41328420	221	+	0.29527	CCTCGCCACATCACCTCCATT	7.55254e-05	NI-NG-NI-NN-NI-HD-NS-NS-NN-NG-HD-NS-HD-NN-HD-HD-HD-NI-NG-NG	TAL20Xam668
[truncated: 606 more rows]

## Sheet: Sweet orange
# Seq-ID	Position	Strand	Score	Sequence	Approx. p-value	RVDs	TALE
orange1.1g026556m.v1.1;pacid=18129398	210	+	0.615118	TATAAACCCCTTTTGCCTT	1.58115e-08	NI-N*-NI-NI-NI-HD-HD-NG-HD-NG-NG-NG-NG-NS-HD-HD-NG-NG	PthA4
orange1.1g020572m.v1.1;pacid=18133141	14	-	0.575782	TAAAAACCTCATTTCCCTT	8.80473e-08	NI-N*-NI-NI-NI-HD-HD-NG-HD-NG-NG-NG-NG-NS-HD-HD-NG-NG	PthA4
orange1.1g020559m.v1.1;pacid=18133143	309	-	0.575782	TAAAAACCTCATTTCCCTT	8.80473e-08	NI-N*-NI-NI-NI-HD-HD-NG-HD-NG-NG-NG-NG-NS-HD-HD-NG-NG	PthA4
orange1.1g028817m.v1.1;pacid=18098128	173	+	0.550524	TATCATCCTCTTTTTCCTT	2.52539e-07	NI-N*-NI-NI-NI-HD-HD-NG-HD-NG-NG-NG-NG-NS-HD-HD-NG-NG	PthA4
orange1.1g027820m.v1.1;pacid=18131913	66	+	0.543471	TACAAACCTCATTTTTCTT	3.3664e-07	NI-N*-NI-NI-NI-HD-HD-NG-HD-NG-NG-NG-NG-NS-HD-HD-NG-NG	PthA4
orange1.1g037496m.v1.1;pacid=18127701	57	+	0.543275	TACTAACCTCTTTTCTCTT	3.39319e-07	NI-N*-NI-NI-NI-HD-HD-NG-HD-NG-NG-NG-NG-NS-HD-HD-NG-NG	PthA4
orange1.1g028855m.v1.1;pacid=18112161	280	+	0.53995	TAGGCACCTCTTTTACCTT	3.88139e-07	NI-N*-NI-NI-NI-HD-HD-NG-HD-NG-NG-NG-NG-NS-HD-HD-NG-NG	PthA4
orange1.1g028856m.v1.1;pacid=18112162	280	+	0.53995	TAGGCACCTCTTTTACCTT	3.88139e-07	NI-N*-NI-NI-NI-HD-HD-NG-HD-NG-NG-NG-NG-NS-HD-HD-NG-NG	PthA4
orange1.1g018297m.v1.1;pacid=18095192	208	+	0.539851	TATAAATCACTTTTTCCTT	3.89699e-07	NI-N*-NI-NI-NI-HD-HD-NG-HD-NG-NG-NG-NG-NS-HD-HD-NG-NG	PthA4
orange1.1g020496m.v1.1;pacid=18095193	208	+	0.539851	TATAAATCACTTTTTCCTT	3.89699e-07	NI-N*-NI-NI-NI-HD-HD-NG-HD-NG-NG-NG-NG-NS-HD-HD-NG-NG	PthA4
orange1.1g036260m.v1.1;pacid=18127268	189	-	0.536692	TATTAACCTCTTTTGCGTT	4.42492e-07	NI-N*-NI-NI-NI-HD-HD-NG-HD-NG-NG-NG-NG-NS-HD-HD-NG-NG	PthA4
orange1.1g037808m.v1.1;pacid=18123338	239	+	0.522719	TAGAAACCTTTTTTGCTTT	7.70793e-07	NI-N*-NI-NI-NI-HD-HD-NG-HD-NG-NG-NG-NG-NS-HD-HD-NG-NG	PthA4
orange1.1g033811m.v1.1;pacid=18091017	129	+	0.522479	TTCACACCTCTTTTGACTT	7.78102e-07	NI-N*-NI-NI-NI-HD-HD-NG-HD-NG-NG-NG-NG-NS-HD-HD-NG-NG	PthA4
orange1.1g031455m.v1.1;pacid=18134191	66	+	0.51549	TAAAAACCTCTCTTTTCTT	1.02246e-06	NI-N*-NI-NI-NI-HD-HD-NG-HD-NG-NG-NG-NG-NS-HD-HD-NG-NG	PthA4
orange1.1g031486m.v1.1;pacid=18134192	340	+	0.51549	TAAAAACCTCTCTTTTCTT	1.02246e-06	NI-N*-NI-NI-NI-HD-HD-NG-HD-NG-NG-NG-NG-NS-HD-HD-NG-NG	PthA4
orange1.1g031603m.v1.1;pacid=18134193	340	+	0.51549	TAAAAACCTCTCTTTTCTT	1.02246e-06	NI-N*-NI-NI-NI-HD-HD-NG-HD-NG-NG-NG-NG-NS-HD-HD-NG-NG	PthA4
orange1.1g033611m.v1.1;pacid=18134194	340	+	0.51549	TAAAAACCTCTCTTTTCTT	1.02246e-06	NI-N*-NI-NI-NI-HD-HD-NG-HD-NG-NG-NG-NG-NS-HD-HD-NG-NG	PthA4
orange1.1g002617m.v1.1;pacid=18128729	69	+	0.512313	AACAAAAATCTTTTACCTT	1.1565e-06	NI-N*-NI-NI-NI-HD-HD-NG-HD-NG-NG-NG-NG-NS-HD-HD-NG-NG	PthA4
orange1.1g006365m.v1.1;pacid=18128731	69	+	0.512313	AACAAAAATCTTTTACCTT	1.1565e-06	NI-N*-NI-NI-NI-HD-HD-NG-HD-NG-NG-NG-NG-NS-HD-HD-NG-NG	PthA4
orange1.1g006999m.v1.1;pacid=18128732	69	+	0.512313	AACAAAAATCTTTTACCTT	1.1565e-06	NI-N*-NI-NI-NI-HD-HD-NG-HD-NG-NG-NG-NG-NS-HD-HD-NG-NG	PthA4
orange1.1g007674m.v1.1;pacid=18128733	69	+	0.512313	AACAAAAATCTTTTACCTT	1.1565e-06	NI-N*-NI-NI-NI-HD-HD-NG-HD-NG-NG-NG-NG-NS-HD-HD-NG-NG	PthA4
orange1.1g007678m.v1.1;pacid=18128734	69	+	0.512313	AACAAAAATCTTTTACCTT	1.1565e-06	NI-N*-NI-NI-NI-HD-HD-NG-HD-NG-NG-NG-NG-NS-HD-HD-NG-NG	PthA4
orange1.1g008659m.v1.1;pacid=18128735	69	+	0.512313	AACAAAAATCTTTTACCTT	1.1565e-06	NI-N*-NI-NI-NI-HD-HD-NG-HD-NG-NG-NG-NG-NS-HD-HD-NG-NG	PthA4
orange1.1g012542m.v1.1;pacid=18128736	69	+	0.512313	AACAAAAATCTTTTACCTT	1.1565e-06	NI-N*-NI-NI-NI-HD-HD-NG-HD-NG-NG-NG-NG-NS-HD-HD-NG-NG	PthA4
orange1.1g031111m.v1.1;pacid=18127205	108	-	0.51065	TAAAAACCTCCTTTCCATT	1.23321e-06	NI-N*-NI-NI-NI-HD-HD-NG-HD-NG-NG-NG-NG-NS-HD-HD-NG-NG	PthA4
orange1.1g040509m.v1.1;pacid=18132861	219	-	0.51034	TACAAACCTATTTTTGCTT	1.24807e-06	NI-N*-NI-NI-NI-HD-HD-NG-HD-NG-NG-NG-NG-NS-HD-HD-NG-NG	PthA4
orange1.1g023852m.v1.1;pacid=18108171	201	+	0.509617	CTTTAACCTCTTTTCCCTT	1.28335e-06	NI-N*-NI-NI-NI-HD-HD-NG-HD-NG-NG-NG-NG-NS-HD-HD-NG-NG	PthA4
orange1.1g042968m.v1.1;pacid=18116769	104	-	0.503223	TATATACATATTTTACCTT	1.63975e-06	NI-N*-NI-NI-NI-HD-HD-NG-HD-NG-NG-NG-NG-NS-HD-HD-NG-NG	PthA4
orange1.1g040601m.v1.1;pacid=18118450	21	-	0.502138	TATAAAACTACTTTTCCTT	1.70895e-06	NI-N*-NI-NI-NI-HD-HD-NG-HD-NG-NG-NG-NG-NS-HD-HD-NG-NG	PthA4
orange1.1g030666m.v1.1;pacid=18111302	150	+	0.501421	AACAAACATCTTTTGCCTA	1.75625e-06	NI-N*-NI-NI-NI-HD-HD-NG-HD-NG-NG-NG-NG-NS-HD-HD-NG-NG	PthA4
orange1.1g002926m.v1.1;pacid=18101478	150	-	0.500778	TAATAACCTCTTTTTCTTT	1.79969e-06	NI-N*-NI-NI-NI-HD-HD-NG-HD-NG-NG-NG-NG-NS-HD-HD-NG-NG	PthA4
orange1.1g032877m.v1.1;pacid=18093076	210	+	0.498568	TATAAACCTCCTTCCCCAT	1.95703e-06	NI-N*-NI-NI-NI-HD-HD-NG-HD-NG-NG-NG-NG-NS-HD-HD-NG-NG	PthA4
orange1.1g006000m.v1.1;pacid=18124932	56	+	0.498281	TAAAAAATTATTTTACCTT	1.97843e-06	NI-N*-NI-NI-NI-HD-HD-NG-HD-NG-NG-NG-NG-NS-HD-HD-NG-NG	PthA4
orange1.1g008529m.v1.1;pacid=18124933	56	+	0.498281	TAAAAAATTATTTTACCTT	1.97843e-06	NI-N*-NI-NI-NI-HD-HD-NG-HD-NG-NG-NG-NG-NS-HD-HD-NG-NG	PthA4
orange1.1g012074m.v1.1;pacid=18124934	56	+	0.498281	TAAAAAATTATTTTACCTT	1.97843e-06	NI-N*-NI-NI-NI-HD-HD-NG-HD-NG-NG-NG-NG-NS-HD-HD-NG-NG	PthA4
orange1.1g012106m.v1.1;pacid=18124935	56	+	0.498281	TAAAAAATTATTTTACCTT	1.97843e-06	NI-N*-NI-NI-NI-HD-HD-NG-HD-NG-NG-NG-NG-NS-HD-HD-NG-NG	PthA4
orange1.1g019474m.v1.1;pacid=18124936	56	+	0.498281	TAAAAAATTATTTTACCTT	1.97843e-06	NI-N*-NI-NI-NI-HD-HD-NG-HD-NG-NG-NG-NG-NS-HD-HD-NG-NG	PthA4
orange1.1g031907m.v1.1;pacid=18127623	80	-	0.498016	TATAAAACTCTTTAGTCTT	1.99837e-06	NI-N*-NI-NI-NI-HD-HD-NG-HD-NG-NG-NG-NG-NS-HD-HD-NG-NG	PthA4
orange1.1g032095m.v1.1;pacid=18127624	80	-	0.498016	TATAAAACTCTTTAGTCTT	1.99837e-06	NI-N*-NI-NI-NI-HD-HD-NG-HD-NG-NG-NG-NG-NS-HD-HD-NG-NG	PthA4
orange1.1g032088m.v1.1;pacid=18127625	80	-	0.498016	TATAAAACTCTTTAGTCTT	1.99837e-06	NI-N*-NI-NI-NI-HD-HD-NG-HD-NG-NG-NG-NG-NS-HD-HD-NG-NG	PthA4
orange1.1g033894m.v1.1;pacid=18127626	80	-	0.498016	TATAAAACTCTTTAGTCTT	1.99837e-06	NI-N*-NI-NI-NI-HD-HD-NG-HD-NG-NG-NG-NG-NS-HD-HD-NG-NG	PthA4
orange1.1g033921m.v1.1;pacid=18127627	80	-	0.498016	TATAAAACTCTTTAGTCTT	1.99837e-06	NI-N*-NI-NI-NI-HD-HD-NG-HD-NG-NG-NG-NG-NS-HD-HD-NG-NG	PthA4
orange1.1g009579m.v1.1;pacid=18132199	376	+	0.497659	CAAAACCCTCTTTTGCTTT	2.0255e-06	NI-N*-NI-NI-NI-HD-HD-NG-HD-NG-NG-NG-NG-NS-HD-HD-NG-NG	PthA4
orange1.1g009587m.v1.1;pacid=18132200	348	+	0.497659	CAAAACCCTCTTTTGCTTT	2.0255e-06	NI-N*-NI-NI-NI-HD-HD-NG-HD-NG-NG-NG-NG-NS-HD-HD-NG-NG	PthA4
orange1.1g009599m.v1.1;pacid=18132201	236	+	0.497659	CAAAACCCTCTTTTGCTTT	2.0255e-06	NI-N*-NI-NI-NI-HD-HD-NG-HD-NG-NG-NG-NG-NS-HD-HD-NG-NG	PthA4
orange1.1g010772m.v1.1;pacid=18132202	376	+	0.497659	CAAAACCCTCTTTTGCTTT	2.0255e-06	NI-N*-NI-NI-NI-HD-HD-NG-HD-NG-NG-NG-NG-NS-HD-HD-NG-NG	PthA4
orange1.1g013911m.v1.1;pacid=18132204	376	+	0.497659	CAAAACCCTCTTTTGCTTT	2.0255e-06	NI-N*-NI-NI-NI-HD-HD-NG-HD-NG-NG-NG-NG-NS-HD-HD-NG-NG	PthA4
orange1.1g013970m.v1.1;pacid=18132205	376	+	0.497659	CAAAACCCTCTTTTGCTTT	2.0255e-06	NI-N*-NI-NI-NI-HD-HD-NG-HD-NG-NG-NG-NG-NS-HD-HD-NG-NG	PthA4
orange1.1g014618m.v1.1;pacid=18132206	376	+	0.497659	CAAAACCCTCTTTTGCTTT	2.0255e-06	NI-N*-NI-NI-NI-HD-HD-NG-HD-NG-NG-NG-NG-NS-HD-HD-NG-NG	PthA4
orange1.1g018861m.v1.1;pacid=18132207	376	+	0.497659	CAAAACCCTCTTTTGCTTT	2.0255e-06	NI-N*-NI-NI-NI-HD-HD-NG-HD-NG-NG-NG-NG-NS-HD-HD-NG-NG	PthA4
orange1.1g020061m.v1.1;pacid=18132208	376	+	0.497659	CAAAACCCTCTTTTGCTTT	2.0255e-06	NI-N*-NI-NI-NI-HD-HD-NG-HD-NG-NG-NG-NG-NS-HD-HD-NG-NG	PthA4
orange1.1g021334m.v1.1;pacid=18132209	376	+	0.497659	CAAAACCCTCTTTTGCTTT	2.0255e-06	NI-N*-NI-NI-NI-HD-HD-NG-HD-NG-NG-NG-NG-NS-HD-HD-NG-NG	PthA4
orange1.1g045127m.v1.1;pacid=18139088	245	+	0.496053	TATACACATCTTCTTCCTT	2.15218e-06	NI-N*-NI-NI-NI-HD-HD-NG-HD-NG-NG-NG-NG-NS-HD-HD-NG-NG	PthA4
orange1.1g013562m.v1.1;pacid=18092598	199	-	0.494108	CAGAAAACTCTTTTATCTT	2.31565e-06	NI-N*-NI-NI-NI-HD-HD-NG-HD-NG-NG-NG-NG-NS-HD-HD-NG-NG	PthA4
orange1.1g016815m.v1.1;pacid=18115226	125	+	0.491168	TACAAACCCCTTTTATATT	2.58563e-06	NI-N*-NI-NI-NI-HD-HD-NG-HD-NG-NG-NG-NG-NS-HD-HD-NG-NG	PthA4
orange1.1g000694m.v1.1;pacid=18109674	178	+	0.490715	TATTTACCTCTCTTTCCTT	2.62982e-06	NI-N*-NI-NI-NI-HD-HD-NG-HD-NG-NG-NG-NG-NS-HD-HD-NG-NG	PthA4
orange1.1g001459m.v1.1;pacid=18109675	178	+	0.490715	TATTTACCTCTCTTTCCTT	2.62982e-06	NI-N*-NI-NI-NI-HD-HD-NG-HD-NG-NG-NG-NG-NS-HD-HD-NG-NG	PthA4
orange1.1g001455m.v1.1;pacid=18109676	178	+	0.490715	TATTTACCTCTCTTTCCTT	2.62982e-06	NI-N*-NI-NI-NI-HD-HD-NG-HD-NG-NG-NG-NG-NS-HD-HD-NG-NG	PthA4
orange1.1g002389m.v1.1;pacid=18109677	178	+	0.490715	TATTTACCTCTCTTTCCTT	2.62982e-06	NI-N*-NI-NI-NI-HD-HD-NG-HD-NG-NG-NG-NG-NS-HD-HD-NG-NG	PthA4
orange1.1g025686m.v1.1;pacid=18092240	151	+	0.488643	TATAAACCGCTTTTGCTTC	2.84131e-06	NI-N*-NI-NI-NI-HD-HD-NG-HD-NG-NG-NG-NG-NS-HD-HD-NG-NG	PthA4
orange1.1g028065m.v1.1;pacid=18092241	151	+	0.488643	TATAAACCGCTTTTGCTTC	2.84131e-06	NI-N*-NI-NI-NI-HD-HD-NG-HD-NG-NG-NG-NG-NS-HD-HD-NG-NG	PthA4
orange1.1g031552m.v1.1;pacid=18092242	151	+	0.488643	TATAAACCGCTTTTGCTTC	2.84131e-06	NI-N*-NI-NI-NI-HD-HD-NG-HD-NG-NG-NG-NG-NS-HD-HD-NG-NG	PthA4
orange1.1g042936m.v1.1;pacid=18097471	183	+	0.488351	TAAATACCTCTTTTCACTC	2.87242e-06	NI-N*-NI-NI-NI-HD-HD-NG-HD-NG-NG-NG-NG-NS-HD-HD-NG-NG	PthA4
orange1.1g034761m.v1.1;pacid=18094515	43	-	0.484849	TATCACCATCTTTTTCCTT	3.27156e-06	NI-N*-NI-NI-NI-HD-HD-NG-HD-NG-NG-NG-NG-NS-HD-HD-NG-NG	PthA4
orange1.1g006781m.v1.1;pacid=18118736	142	+	0.481808	TAAAAATATCTTTTAACTT	3.66066e-06	NI-N*-NI-NI-NI-HD-HD-NG-HD-NG-NG-NG-NG-NS-HD-HD-NG-NG	PthA4
orange1.1g006779m.v1.1;pacid=18118737	142	+	0.481808	TAAAAATATCTTTTAACTT	3.66066e-06	NI-N*-NI-NI-NI-HD-HD-NG-HD-NG-NG-NG-NG-NS-HD-HD-NG-NG	PthA4
orange1.1g006777m.v1.1;pacid=18118738	142	+	0.481808	TAAAAATATCTTTTAACTT	3.66066e-06	NI-N*-NI-NI-NI-HD-HD-NG-HD-NG-NG-NG-NG-NS-HD-HD-NG-NG	PthA4
orange1.1g006810m.v1.1;pacid=18118739	142	+	0.481808	TAAAAATATCTTTTAACTT	3.66066e-06	NI-N*-NI-NI-NI-HD-HD-NG-HD-NG-NG-NG-NG-NS-HD-HD-NG-NG	PthA4
orange1.1g007055m.v1.1;pacid=18118740	142	+	0.481808	TAAAAATATCTTTTAACTT	3.66066e-06	NI-N*-NI-NI-NI-HD-HD-NG-HD-NG-NG-NG-NG-NS-HD-HD-NG-NG	PthA4
orange1.1g008378m.v1.1;pacid=18118741	142	+	0.481808	TAAAAATATCTTTTAACTT	3.66066e-06	NI-N*-NI-NI-NI-HD-HD-NG-HD-NG-NG-NG-NG-NS-HD-HD-NG-NG	PthA4
orange1.1g009020m.v1.1;pacid=18118742	142	+	0.481808	TAAAAATATCTTTTAACTT	3.66066e-06	NI-N*-NI-NI-NI-HD-HD-NG-HD-NG-NG-NG-NG-NS-HD-HD-NG-NG	PthA4
orange1.1g010648m.v1.1;pacid=18118743	142	+	0.481808	TAAAAATATCTTTTAACTT	3.66066e-06	NI-N*-NI-NI-NI-HD-HD-NG-HD-NG-NG-NG-NG-NS-HD-HD-NG-NG	PthA4
orange1.1g010626m.v1.1;pacid=18118744	142	+	0.481808	TAAAAATATCTTTTAACTT	3.66066e-06	NI-N*-NI-NI-NI-HD-HD-NG-HD-NG-NG-NG-NG-NS-HD-HD-NG-NG	PthA4
orange1.1g013770m.v1.1;pacid=18118745	142	+	0.481808	TAAAAATATCTTTTAACTT	3.66066e-06	NI-N*-NI-NI-NI-HD-HD-NG-HD-NG-NG-NG-NG-NS-HD-HD-NG-NG	PthA4
orange1.1g016143m.v1.1;pacid=18118746	142	+	0.481808	TAAAAATATCTTTTAACTT	3.66066e-06	NI-N*-NI-NI-NI-HD-HD-NG-HD-NG-NG-NG-NG-NS-HD-HD-NG-NG	PthA4
orange1.1g013261m.v1.1;pacid=18092290	294	+	0.481785	TACAAATCTCTCTTCCCTG	3.66371e-06	NI-N*-NI-NI-NI-HD-HD-NG-HD-NG-NG-NG-NG-NS-HD-HD-NG-NG	PthA4
orange1.1g013208m.v1.1;pacid=18092291	294	+	0.481785	TACAAATCTCTCTTCCCTG	3.66371e-06	NI-N*-NI-NI-NI-HD-HD-NG-HD-NG-NG-NG-NG-NS-HD-HD-NG-NG	PthA4
orange1.1g017432m.v1.1;pacid=18126994	46	+	0.48177	CCAAAACCTCTTTTTCTTT	3.66578e-06	NI-N*-NI-NI-NI-HD-HD-NG-HD-NG-NG-NG-NG-NS-HD-HD-NG-NG	PthA4
orange1.1g018319m.v1.1;pacid=18126995	46	+	0.48177	CCAAAACCTCTTTTTCTTT	3.66578e-06	NI-N*-NI-NI-NI-HD-HD-NG-HD-NG-NG-NG-NG-NS-HD-HD-NG-NG	PthA4
orange1.1g016359m.v1.1;pacid=18093357	426	-	0.481735	TCTAAACCTCTGTGGCCTT	3.67054e-06	NI-N*-NI-NI-NI-HD-HD-NG-HD-NG-NG-NG-NG-NS-HD-HD-NG-NG	PthA4
orange1.1g016443m.v1.1;pacid=18109055	286	+	0.481163	AAGAAACATATTTTCCCTT	3.74864e-06	NI-N*-NI-NI-NI-HD-HD-NG-HD-NG-NG-NG-NG-NS-HD-HD-NG-NG	PthA4
orange1.1g032914m.v1.1;pacid=18129071	7	+	0.481058	TAGTAAAATCTTTTTCCTT	3.7632e-06	NI-N*-NI-NI-NI-HD-HD-NG-HD-NG-NG-NG-NG-NS-HD-HD-NG-NG	PthA4
orange1.1g006243m.v1.1;pacid=18098129	309	+	0.481045	CAAAAACCTCGTTTGCTTT	3.76496e-06	NI-N*-NI-NI-NI-HD-HD-NG-HD-NG-NG-NG-NG-NS-HD-HD-NG-NG	PthA4
orange1.1g009711m.v1.1;pacid=18098130	309	+	0.481045	CAAAAACCTCGTTTGCTTT	3.76496e-06	NI-N*-NI-NI-NI-HD-HD-NG-HD-NG-NG-NG-NG-NS-HD-HD-NG-NG	PthA4
orange1.1g011089m.v1.1;pacid=18098131	377	+	0.481045	CAAAAACCTCGTTTGCTTT	3.76496e-06	NI-N*-NI-NI-NI-HD-HD-NG-HD-NG-NG-NG-NG-NS-HD-HD-NG-NG	PthA4
orange1.1g047774m.v1.1;pacid=18097949	39	-	0.480777	TAAAAAAATATTTTTCCTT	3.80239e-06	NI-N*-NI-NI-NI-HD-HD-NG-HD-NG-NG-NG-NG-NS-HD-HD-NG-NG	PthA4
orange1.1g040328m.v1.1;pacid=18106602	21	+	0.479022	TAATAACATCTATTGCCTT	4.05571e-06	NI-N*-NI-NI-NI-HD-HD-NG-HD-NG-NG-NG-NG-NS-HD-HD-NG-NG	PthA4
orange1.1g017778m.v1.1;pacid=18131519	389	+	0.478977	TAAAAAACACTTTTCTCTT	4.06237e-06	NI-N*-NI-NI-NI-HD-HD-NG-HD-NG-NG-NG-NG-NS-HD-HD-NG-NG	PthA4
orange1.1g019855m.v1.1;pacid=18131520	389	+	0.478977	TAAAAAACACTTTTCTCTT	4.06237e-06	NI-N*-NI-NI-NI-HD-HD-NG-HD-NG-NG-NG-NG-NS-HD-HD-NG-NG	PthA4
orange1.1g033699m.v1.1;pacid=18124403	211	+	0.478161	TAGCAACTTATTTTTCCTT	4.18579e-06	NI-N*-NI-NI-NI-HD-HD-NG-HD-NG-NG-NG-NG-NS-HD-HD-NG-NG	PthA4
orange1.1g033757m.v1.1;pacid=18124404	211	+	0.478161	TAGCAACTTATTTTTCCTT	4.18579e-06	NI-N*-NI-NI-NI-HD-HD-NG-HD-NG-NG-NG-NG-NS-HD-HD-NG-NG	PthA4
orange1.1g033746m.v1.1;pacid=18124405	211	+	0.478161	TAGCAACTTATTTTTCCTT	4.18579e-06	NI-N*-NI-NI-NI-HD-HD-NG-HD-NG-NG-NG-NG-NS-HD-HD-NG-NG	PthA4
orange1.1g034696m.v1.1;pacid=18124406	211	+	0.478161	TAGCAACTTATTTTTCCTT	4.18579e-06	NI-N*-NI-NI-NI-HD-HD-NG-HD-NG-NG-NG-NG-NS-HD-HD-NG-NG	PthA4
orange1.1g005250m.v1.1;pacid=18134086	86	-	0.478157	TTTAAACCTCTCTCTCCTT	4.18637e-06	NI-N*-NI-NI-NI-HD-HD-NG-HD-NG-NG-NG-NG-NS-HD-HD-NG-NG	PthA4
orange1.1g008020m.v1.1;pacid=18113184	229	-	0.477255	TATCAACTTCTTTTACTTT	4.32704e-06	NI-N*-NI-NI-NI-HD-HD-NG-HD-NG-NG-NG-NG-NS-HD-HD-NG-NG	PthA4
orange1.1g025589m.v1.1;pacid=18118875	77	+	0.477239	CACAAACCTATTTTTATTT	4.32958e-06	NI-N*-NI-NI-NI-HD-HD-NG-HD-NG-NG-NG-NG-NS-HD-HD-NG-NG	PthA4
orange1.1g041711m.v1.1;pacid=18091848	167	+	0.477229	AAGAAAACTCTTATTCCTT	4.33103e-06	NI-N*-NI-NI-NI-HD-HD-NG-HD-NG-NG-NG-NG-NS-HD-HD-NG-NG	PthA4
orange1.1g033250m.v1.1;pacid=18114104	469	+	0.477223	CTCGAAACTCTTTTGCCTT	4.33205e-06	NI-N*-NI-NI-NI-HD-HD-NG-HD-NG-NG-NG-NG-NS-HD-HD-NG-NG	PthA4
orange1.1g039115m.v1.1;pacid=18127728	75	-	0.477183	TATACACCTCTTTTATTTT	4.33832e-06	NI-N*-NI-NI-NI-HD-HD-NG-HD-NG-NG-NG-NG-NS-HD-HD-NG-NG	PthA4
orange1.1g017177m.v1.1;pacid=18098618	153	+	0.477022	TAAAACCCACTTTTGCGTT	4.36407e-06	NI-N*-NI-NI-NI-HD-HD-NG-HD-NG-NG-NG-NG-NS-HD-HD-NG-NG	PthA4
orange1.1g022413m.v1.1;pacid=18098619	153	+	0.477022	TAAAACCCACTTTTGCGTT	4.36407e-06	NI-N*-NI-NI-NI-HD-HD-NG-HD-NG-NG-NG-NG-NS-HD-HD-NG-NG	PthA4
orange1.1g047703m.v1.1;pacid=18127129	242	+	0.476997	TTAAAAACTCTTTTCCCCT	4.36808e-06	NI-N*-NI-NI-NI-HD-HD-NG-HD-NG-NG-NG-NG-NS-HD-HD-NG-NG	PthA4
orange1.1g035940m.v1.1;pacid=18110270	117	+	0.476978	TTTAAATCTCTCTTTCCTT	4.37107e-06	NI-N*-NI-NI-NI-HD-HD-NG-HD-NG-NG-NG-NG-NS-HD-HD-NG-NG	PthA4
orange1.1g040224m.v1.1;pacid=18124883	0	-	0.476228	TATAATCGTCTTTTACATT	4.49254e-06	NI-N*-NI-NI-NI-HD-HD-NG-HD-NG-NG-NG-NG-NS-HD-HD-NG-NG	PthA4
orange1.1g021438m.v1.1;pacid=18118481	409	+	0.476213	TTTAAACCTCTTTCTCGTT	4.49505e-06	NI-N*-NI-NI-NI-HD-HD-NG-HD-NG-NG-NG-NG-NS-HD-HD-NG-NG	PthA4
orange1.1g023713m.v1.1;pacid=18118482	409	+	0.476213	TTTAAACCTCTTTCTCGTT	4.49505e-06	NI-N*-NI-NI-NI-HD-HD-NG-HD-NG-NG-NG-NG-NS-HD-HD-NG-NG	PthA4
orange1.1g025357m.v1.1;pacid=18118483	409	+	0.476213	TTTAAACCTCTTTCTCGTT	4.49505e-06	NI-N*-NI-NI-NI-HD-HD-NG-HD-NG-NG-NG-NG-NS-HD-HD-NG-NG	PthA4
orange1.1g025429m.v1.1;pacid=18125713	326	-	0.475677	TTTAATCTTCTTTTACCTT	4.58382e-06	NI-N*-NI-NI-NI-HD-HD-NG-HD-NG-NG-NG-NG-NS-HD-HD-NG-NG	PthA4
orange1.1g026147m.v1.1;pacid=18125714	326	-	0.475677	TTTAATCTTCTTTTACCTT	4.58382e-06	NI-N*-NI-NI-NI-HD-HD-NG-HD-NG-NG-NG-NG-NS-HD-HD-NG-NG	PthA4
orange1.1g024941m.v1.1;pacid=18117879	423	+	0.475252	TATAAACTTTTTTTACTTT	4.65543e-06	NI-N*-NI-NI-NI-HD-HD-NG-HD-NG-NG-NG-NG-NS-HD-HD-NG-NG	PthA4
orange1.1g007458m.v1.1;pacid=18100811	184	+	0.474767	TATAAATTTCTTTTACTTT	4.73857e-06	NI-N*-NI-NI-NI-HD-HD-NG-HD-NG-NG-NG-NG-NS-HD-HD-NG-NG	PthA4
orange1.1g011297m.v1.1;pacid=18100812	184	+	0.474767	TATAAATTTCTTTTACTTT	4.73857e-06	NI-N*-NI-NI-NI-HD-HD-NG-HD-NG-NG-NG-NG-NS-HD-HD-NG-NG	PthA4
orange1.1g011582m.v1.1;pacid=18100813	184	+	0.474767	TATAAATTTCTTTTACTTT	4.73857e-06	NI-N*-NI-NI-NI-HD-HD-NG-HD-NG-NG-NG-NG-NS-HD-HD-NG-NG	PthA4
orange1.1g001722m.v1.1;pacid=18101370	63	+	0.473585	AATAAACCTTTTATTCCTT	4.94688e-06	NI-N*-NI-NI-NI-HD-HD-NG-HD-NG-NG-NG-NG-NS-HD-HD-NG-NG	PthA4
orange1.1g001402m.v1.1;pacid=18135818	182	+	0.472826	TTGAAAACTTTTTTCCCTT	5.08527e-06	NI-N*-NI-NI-NI-HD-HD-NG-HD-NG-NG-NG-NG-NS-HD-HD-NG-NG	PthA4
orange1.1g039053m.v1.1;pacid=18097385	15	-	0.472768	TAGAAACCTATTTACCCCT	5.09616e-06	NI-N*-NI-NI-NI-HD-HD-NG-HD-NG-NG-NG-NG-NS-HD-HD-NG-NG	PthA4
orange1.1g017691m.v1.1;pacid=18101449	102	+	0.472553	TAGTAACATCTTTTGTCTT	5.13601e-06	NI-N*-NI-NI-NI-HD-HD-NG-HD-NG-NG-NG-NG-NS-HD-HD-NG-NG	PthA4
orange1.1g007546m.v1.1;pacid=18119390	280	+	0.472449	TCAAAACCTCTTCTTCATT	5.15556e-06	NI-N*-NI-NI-NI-HD-HD-NG-HD-NG-NG-NG-NG-NS-HD-HD-NG-NG	PthA4
orange1.1g011018m.v1.1;pacid=18097157	10	-	0.472179	AATAAATATCTTTTACCTT	5.20626e-06	NI-N*-NI-NI-NI-HD-HD-NG-HD-NG-NG-NG-NG-NS-HD-HD-NG-NG	PthA4
orange1.1g035297m.v1.1;pacid=18113576	457	+	0.471098	TCGAAACTTCTGTTGCCTT	5.41431e-06	NI-N*-NI-NI-NI-HD-HD-NG-HD-NG-NG-NG-NG-NS-HD-HD-NG-NG	PthA4
orange1.1g037305m.v1.1;pacid=18124322	146	+	0.471083	CACAAACCCCTTTTAATTT	5.41738e-06	NI-N*-NI-NI-NI-HD-HD-NG-HD-NG-NG-NG-NG-NS-HD-HD-NG-NG	PthA4
orange1.1g023730m.v1.1;pacid=18116764	341	+	0.470841	CACAAATATATTTTACCTT	5.46492e-06	NI-N*-NI-NI-NI-HD-HD-NG-HD-NG-NG-NG-NG-NS-HD-HD-NG-NG	PthA4
orange1.1g041423m.v1.1;pacid=18118603	237	+	0.469883	TACAATACTCTTTTCGCTT	5.65777e-06	NI-N*-NI-NI-NI-HD-HD-NG-HD-NG-NG-NG-NG-NS-HD-HD-NG-NG	PthA4
orange1.1g002522m.v1.1;pacid=18117857	42	-	0.469541	TACAATCCTCGTTTGCGTT	5.72816e-06	NI-N*-NI-NI-NI-HD-HD-NG-HD-NG-NG-NG-NG-NS-HD-HD-NG-NG	PthA4
orange1.1g007376m.v1.1;pacid=18104023	394	+	0.469387	TAGCAATCTCTTCTCCCTT	5.76021e-06	NI-N*-NI-NI-NI-HD-HD-NG-HD-NG-NG-NG-NG-NS-HD-HD-NG-NG	PthA4
orange1.1g008680m.v1.1;pacid=18133638	136	-	0.469342	TTCCAACTTCTTTTTCCTT	5.76957e-06	NI-N*-NI-NI-NI-HD-HD-NG-HD-NG-NG-NG-NG-NS-HD-HD-NG-NG	PthA4
orange1.1g008776m.v1.1;pacid=18133639	136	-	0.469342	TTCCAACTTCTTTTTCCTT	5.76957e-06	NI-N*-NI-NI-NI-HD-HD-NG-HD-NG-NG-NG-NG-NS-HD-HD-NG-NG	PthA4
orange1.1g008770m.v1.1;pacid=18133640	212	-	0.469342	TTCCAACTTCTTTTTCCTT	5.76957e-06	NI-N*-NI-NI-NI-HD-HD-NG-HD-NG-NG-NG-NG-NS-HD-HD-NG-NG	PthA4
orange1.1g032930m.v1.1;pacid=18095328	29	-	0.469181	TTTAAACCTCTTTTCTCTA	5.80307e-06	NI-N*-NI-NI-NI-HD-HD-NG-HD-NG-NG-NG-NG-NS-HD-HD-NG-NG	PthA4
orange1.1g032970m.v1.1;pacid=18095329	29	-	0.469181	TTTAAACCTCTTTTCTCTA	5.80307e-06	NI-N*-NI-NI-NI-HD-HD-NG-HD-NG-NG-NG-NG-NS-HD-HD-NG-NG	PthA4
orange1.1g046281m.v1.1;pacid=18118502	210	+	0.467787	TACTAACATATTTTCACTT	6.10254e-06	NI-N*-NI-NI-NI-HD-HD-NG-HD-NG-NG-NG-NG-NS-HD-HD-NG-NG	PthA4
orange1.1g028492m.v1.1;pacid=18105700	10	+	0.467349	CATTAGCCTCTCTTGCCTT	6.19937e-06	NI-N*-NI-NI-NI-HD-HD-NG-HD-NG-NG-NG-NG-NS-HD-HD-NG-NG	PthA4
orange1.1g029365m.v1.1;pacid=18105701	10	+	0.467349	CATTAGCCTCTCTTGCCTT	6.19937e-06	NI-N*-NI-NI-NI-HD-HD-NG-HD-NG-NG-NG-NG-NS-HD-HD-NG-NG	PthA4
orange1.1g030997m.v1.1;pacid=18105702	10	+	0.467349	CATTAGCCTCTCTTGCCTT	6.19937e-06	NI-N*-NI-NI-NI-HD-HD-NG-HD-NG-NG-NG-NG-NS-HD-HD-NG-NG	PthA4
orange1.1g009951m.v1.1;pacid=18127872	243	+	0.467227	CATAAACATATTTTTCATT	6.22668e-06	NI-N*-NI-NI-NI-HD-HD-NG-HD-NG-NG-NG-NG-NS-HD-HD-NG-NG	PthA4
orange1.1g012343m.v1.1;pacid=18127873	243	+	0.467227	CATAAACATATTTTTCATT	6.22668e-06	NI-N*-NI-NI-NI-HD-HD-NG-HD-NG-NG-NG-NG-NS-HD-HD-NG-NG	PthA4
orange1.1g013078m.v1.1;pacid=18127874	243	+	0.467227	CATAAACATATTTTTCATT	6.22668e-06	NI-N*-NI-NI-NI-HD-HD-NG-HD-NG-NG-NG-NG-NS-HD-HD-NG-NG	PthA4
orange1.1g017470m.v1.1;pacid=18127875	243	+	0.467227	CATAAACATATTTTTCATT	6.22668e-06	NI-N*-NI-NI-NI-HD-HD-NG-HD-NG-NG-NG-NG-NS-HD-HD-NG-NG	PthA4
orange1.1g027691m.v1.1;pacid=18136908	345	+	0.467187	TATAATACTCTTTTAATTT	6.23569e-06	NI-N*-NI-NI-NI-HD-HD-NG-HD-NG-NG-NG-NG-NS-HD-HD-NG-NG	PthA4
orange1.1g027684m.v1.1;pacid=18136909	345	+	0.467187	TATAATACTCTTTTAATTT	6.23569e-06	NI-N*-NI-NI-NI-HD-HD-NG-HD-NG-NG-NG-NG-NS-HD-HD-NG-NG	PthA4
orange1.1g027658m.v1.1;pacid=18136910	446	+	0.467187	TATAATACTCTTTTAATTT	6.23569e-06	NI-N*-NI-NI-NI-HD-HD-NG-HD-NG-NG-NG-NG-NS-HD-HD-NG-NG	PthA4
orange1.1g027667m.v1.1;pacid=18136911	345	+	0.467187	TATAATACTCTTTTAATTT	6.23569e-06	NI-N*-NI-NI-NI-HD-HD-NG-HD-NG-NG-NG-NG-NS-HD-HD-NG-NG	PthA4
orange1.1g028641m.v1.1;pacid=18136913	345	+	0.467187	TATAATACTCTTTTAATTT	6.23569e-06	NI-N*-NI-NI-NI-HD-HD-NG-HD-NG-NG-NG-NG-NS-HD-HD-NG-NG	PthA4
orange1.1g030748m.v1.1;pacid=18136914	345	+	0.467187	TATAATACTCTTTTAATTT	6.23569e-06	NI-N*-NI-NI-NI-HD-HD-NG-HD-NG-NG-NG-NG-NS-HD-HD-NG-NG	PthA4
orange1.1g031002m.v1.1;pacid=18136915	345	+	0.467187	TATAATACTCTTTTAATTT	6.23569e-06	NI-N*-NI-NI-NI-HD-HD-NG-HD-NG-NG-NG-NG-NS-HD-HD-NG-NG	PthA4
orange1.1g031713m.v1.1;pacid=18139064	10	+	0.465437	TAAAACCCTCTTTTCTATT	6.64053e-06	NI-N*-NI-NI-NI-HD-HD-NG-HD-NG-NG-NG-NG-NS-HD-HD-NG-NG	PthA4
orange1.1g044962m.v1.1;pacid=18092671	57	-	0.465067	TAAGAACCTCTTATTACTT	6.72942e-06	NI-N*-NI-NI-NI-HD-HD-NG-HD-NG-NG-NG-NG-NS-HD-HD-NG-NG	PthA4
orange1.1g033198m.v1.1;pacid=18135402	89	+	0.464716	TATTAACGTTTTTTTCCTT	6.81452e-06	NI-N*-NI-NI-NI-HD-HD-NG-HD-NG-NG-NG-NG-NS-HD-HD-NG-NG	PthA4
orange1.1g001007m.v1.1;pacid=18139425	357	-	0.46468	CACAACACTCTTTTATCTT	6.82335e-06	NI-N*-NI-NI-NI-HD-HD-NG-HD-NG-NG-NG-NG-NS-HD-HD-NG-NG	PthA4
orange1.1g001022m.v1.1;pacid=18139426	357	-	0.46468	CACAACACTCTTTTATCTT	6.82335e-06	NI-N*-NI-NI-NI-HD-HD-NG-HD-NG-NG-NG-NG-NS-HD-HD-NG-NG	PthA4
orange1.1g001081m.v1.1;pacid=18139427	357	-	0.46468	CACAACACTCTTTTATCTT	6.82335e-06	NI-N*-NI-NI-NI-HD-HD-NG-HD-NG-NG-NG-NG-NS-HD-HD-NG-NG	PthA4
orange1.1g001652m.v1.1;pacid=18139428	357	-	0.46468	CACAACACTCTTTTATCTT	6.82335e-06	NI-N*-NI-NI-NI-HD-HD-NG-HD-NG-NG-NG-NG-NS-HD-HD-NG-NG	PthA4
orange1.1g002175m.v1.1;pacid=18139429	357	-	0.46468	CACAACACTCTTTTATCTT	6.82335e-06	NI-N*-NI-NI-NI-HD-HD-NG-HD-NG-NG-NG-NG-NS-HD-HD-NG-NG	PthA4
orange1.1g005938m.v1.1;pacid=18095118	229	+	0.463902	AATACAACTCTTTCGCCTT	7.01614e-06	NI-N*-NI-NI-NI-HD-HD-NG-HD-NG-NG-NG-NG-NS-HD-HD-NG-NG	PthA4
orange1.1g006006m.v1.1;pacid=18095119	229	+	0.463902	AATACAACTCTTTCGCCTT	7.01614e-06	NI-N*-NI-NI-NI-HD-HD-NG-HD-NG-NG-NG-NG-NS-HD-HD-NG-NG	PthA4
orange1.1g006044m.v1.1;pacid=18095120	229	+	0.463902	AATACAACTCTTTCGCCTT	7.01614e-06	NI-N*-NI-NI-NI-HD-HD-NG-HD-NG-NG-NG-NG-NS-HD-HD-NG-NG	PthA4
orange1.1g006649m.v1.1;pacid=18095121	229	+	0.463902	AATACAACTCTTTCGCCTT	7.01614e-06	NI-N*-NI-NI-NI-HD-HD-NG-HD-NG-NG-NG-NG-NS-HD-HD-NG-NG	PthA4
orange1.1g006661m.v1.1;pacid=18095122	229	+	0.463902	AATACAACTCTTTCGCCTT	7.01614e-06	NI-N*-NI-NI-NI-HD-HD-NG-HD-NG-NG-NG-NG-NS-HD-HD-NG-NG	PthA4
orange1.1g006775m.v1.1;pacid=18095123	229	+	0.463902	AATACAACTCTTTCGCCTT	7.01614e-06	NI-N*-NI-NI-NI-HD-HD-NG-HD-NG-NG-NG-NG-NS-HD-HD-NG-NG	PthA4
orange1.1g006759m.v1.1;pacid=18095124	229	+	0.463902	AATACAACTCTTTCGCCTT	7.01614e-06	NI-N*-NI-NI-NI-HD-HD-NG-HD-NG-NG-NG-NG-NS-HD-HD-NG-NG	PthA4
orange1.1g006774m.v1.1;pacid=18095125	229	+	0.463902	AATACAACTCTTTCGCCTT	7.01614e-06	NI-N*-NI-NI-NI-HD-HD-NG-HD-NG-NG-NG-NG-NS-HD-HD-NG-NG	PthA4
orange1.1g007601m.v1.1;pacid=18095126	229	+	0.463902	AATACAACTCTTTCGCCTT	7.01614e-06	NI-N*-NI-NI-NI-HD-HD-NG-HD-NG-NG-NG-NG-NS-HD-HD-NG-NG	PthA4
orange1.1g037038m.v1.1;pacid=18128228	233	+	0.463682	CACAAACGTATTTTGCTTT	7.0718e-06	NI-N*-NI-NI-NI-HD-HD-NG-HD-NG-NG-NG-NG-NS-HD-HD-NG-NG	PthA4
orange1.1g023676m.v1.1;pacid=18096432	9	+	0.463285	AAATAACCTCTTTTTCCAT	7.17285e-06	NI-N*-NI-NI-NI-HD-HD-NG-HD-NG-NG-NG-NG-NS-HD-HD-NG-NG	PthA4
orange1.1g040825m.v1.1;pacid=18113116	156	+	0.46303	AACAAACCAATTTTGCATT	7.23862e-06	NI-N*-NI-NI-NI-HD-HD-NG-HD-NG-NG-NG-NG-NS-HD-HD-NG-NG	PthA4
orange1.1g039647m.v1.1;pacid=18110886	126	+	0.462368	CATTAACCTCTCTTGCTTT	7.41194e-06	NI-N*-NI-NI-NI-HD-HD-NG-HD-NG-NG-NG-NG-NS-HD-HD-NG-NG	PthA4
orange1.1g009793m.v1.1;pacid=18127106	180	+	0.462058	CATAACCCCCATTTCCCTT	7.49425e-06	NI-N*-NI-NI-NI-HD-HD-NG-HD-NG-NG-NG-NG-NS-HD-HD-NG-NG	PthA4
orange1.1g008880m.v1.1;pacid=18126115	389	-	0.461997	TATAAATTTCTTTTACTTT	7.51073e-06	NI-N*-NI-NI-NI-HD-HD-NG-HD-NG-NG-NG-NG-NS-HD-HD-NG-NG	PthA4
orange1.1g008890m.v1.1;pacid=18126116	165	-	0.461997	TATAAATTTCTTTTACTTT	7.51073e-06	NI-N*-NI-NI-NI-HD-HD-NG-HD-NG-NG-NG-NG-NS-HD-HD-NG-NG	PthA4
orange1.1g008875m.v1.1;pacid=18126117	165	-	0.461997	TATAAATTTCTTTTACTTT	7.51073e-06	NI-N*-NI-NI-NI-HD-HD-NG-HD-NG-NG-NG-NG-NS-HD-HD-NG-NG	PthA4
orange1.1g008868m.v1.1;pacid=18126118	165	-	0.461997	TATAAATTTCTTTTACTTT	7.51073e-06	NI-N*-NI-NI-NI-HD-HD-NG-HD-NG-NG-NG-NG-NS-HD-HD-NG-NG	PthA4
orange1.1g013188m.v1.1;pacid=18126119	165	-	0.461997	TATAAATTTCTTTTACTTT	7.51073e-06	NI-N*-NI-NI-NI-HD-HD-NG-HD-NG-NG-NG-NG-NS-HD-HD-NG-NG	PthA4
orange1.1g013488m.v1.1;pacid=18126120	165	-	0.461997	TATAAATTTCTTTTACTTT	7.51073e-06	NI-N*-NI-NI-NI-HD-HD-NG-HD-NG-NG-NG-NG-NS-HD-HD-NG-NG	PthA4
orange1.1g001814m.v1.1;pacid=18137577	89	-	0.461682	TATAACCTTTTTTTTCCTT	7.59554e-06	NI-N*-NI-NI-NI-HD-HD-NG-HD-NG-NG-NG-NG-NS-HD-HD-NG-NG	PthA4
orange1.1g001935m.v1.1;pacid=18137578	89	-	0.461682	TATAACCTTTTTTTTCCTT	7.59554e-06	NI-N*-NI-NI-NI-HD-HD-NG-HD-NG-NG-NG-NG-NS-HD-HD-NG-NG	PthA4
orange1.1g003221m.v1.1;pacid=18137580	89	-	0.461682	TATAACCTTTTTTTTCCTT	7.59554e-06	NI-N*-NI-NI-NI-HD-HD-NG-HD-NG-NG-NG-NG-NS-HD-HD-NG-NG	PthA4
orange1.1g003907m.v1.1;pacid=18137581	89	-	0.461682	TATAACCTTTTTTTTCCTT	7.59554e-06	NI-N*-NI-NI-NI-HD-HD-NG-HD-NG-NG-NG-NG-NS-HD-HD-NG-NG	PthA4
orange1.1g004255m.v1.1;pacid=18137582	89	-	0.461682	TATAACCTTTTTTTTCCTT	7.59554e-06	NI-N*-NI-NI-NI-HD-HD-NG-HD-NG-NG-NG-NG-NS-HD-HD-NG-NG	PthA4
orange1.1g044767m.v1.1;pacid=18118236	157	-	0.461345	TTTAATCCTTTTTTTCCTT	7.68747e-06	NI-N*-NI-NI-NI-HD-HD-NG-HD-NG-NG-NG-NG-NS-HD-HD-NG-NG	PthA4
orange1.1g010564m.v1.1;pacid=18130869	171	-	0.461279	TAGAAACCTCTTTTAAGGT	7.70544e-06	NI-N*-NI-NI-NI-HD-HD-NG-HD-NG-NG-NG-NG-NS-HD-HD-NG-NG	PthA4
orange1.1g003719m.v1.1;pacid=18091737	55	-	0.461065	TATAAACCTTGTTTACCTG	7.76449e-06	NI-N*-NI-NI-NI-HD-HD-NG-HD-NG-NG-NG-NG-NS-HD-HD-NG-NG	PthA4
orange1.1g003760m.v1.1;pacid=18091738	55	-	0.461065	TATAAACCTTGTTTACCTG	7.76449e-06	NI-N*-NI-NI-NI-HD-HD-NG-HD-NG-NG-NG-NG-NS-HD-HD-NG-NG	PthA4
orange1.1g003775m.v1.1;pacid=18091740	55	-	0.461065	TATAAACCTTGTTTACCTG	7.76449e-06	NI-N*-NI-NI-NI-HD-HD-NG-HD-NG-NG-NG-NG-NS-HD-HD-NG-NG	PthA4
orange1.1g003823m.v1.1;pacid=18091741	55	-	0.461065	TATAAACCTTGTTTACCTG	7.76449e-06	NI-N*-NI-NI-NI-HD-HD-NG-HD-NG-NG-NG-NG-NS-HD-HD-NG-NG	PthA4
orange1.1g003837m.v1.1;pacid=18091742	55	-	0.461065	TATAAACCTTGTTTACCTG	7.76449e-06	NI-N*-NI-NI-NI-HD-HD-NG-HD-NG-NG-NG-NG-NS-HD-HD-NG-NG	PthA4
orange1.1g003984m.v1.1;pacid=18091744	55	-	0.461065	TATAAACCTTGTTTACCTG	7.76449e-06	NI-N*-NI-NI-NI-HD-HD-NG-HD-NG-NG-NG-NG-NS-HD-HD-NG-NG	PthA4
orange1.1g004029m.v1.1;pacid=18091745	55	-	0.461065	TATAAACCTTGTTTACCTG	7.76449e-06	NI-N*-NI-NI-NI-HD-HD-NG-HD-NG-NG-NG-NG-NS-HD-HD-NG-NG	PthA4
orange1.1g004046m.v1.1;pacid=18091746	55	-	0.461065	TATAAACCTTGTTTACCTG	7.76449e-06	NI-N*-NI-NI-NI-HD-HD-NG-HD-NG-NG-NG-NG-NS-HD-HD-NG-NG	PthA4
orange1.1g004102m.v1.1;pacid=18091747	55	-	0.461065	TATAAACCTTGTTTACCTG	7.76449e-06	NI-N*-NI-NI-NI-HD-HD-NG-HD-NG-NG-NG-NG-NS-HD-HD-NG-NG	PthA4
orange1.1g004152m.v1.1;pacid=18091748	55	-	0.461065	TATAAACCTTGTTTACCTG	7.76449e-06	NI-N*-NI-NI-NI-HD-HD-NG-HD-NG-NG-NG-NG-NS-HD-HD-NG-NG	PthA4
orange1.1g004464m.v1.1;pacid=18091749	55	-	0.461065	TATAAACCTTGTTTACCTG	7.76449e-06	NI-N*-NI-NI-NI-HD-HD-NG-HD-NG-NG-NG-NG-NS-HD-HD-NG-NG	PthA4
orange1.1g004497m.v1.1;pacid=18091750	55	-	0.461065	TATAAACCTTGTTTACCTG	7.76449e-06	NI-N*-NI-NI-NI-HD-HD-NG-HD-NG-NG-NG-NG-NS-HD-HD-NG-NG	PthA4
orange1.1g004570m.v1.1;pacid=18091751	55	-	0.461065	TATAAACCTTGTTTACCTG	7.76449e-06	NI-N*-NI-NI-NI-HD-HD-NG-HD-NG-NG-NG-NG-NS-HD-HD-NG-NG	PthA4
orange1.1g006406m.v1.1;pacid=18091752	55	-	0.461065	TATAAACCTTGTTTACCTG	7.76449e-06	NI-N*-NI-NI-NI-HD-HD-NG-HD-NG-NG-NG-NG-NS-HD-HD-NG-NG	PthA4
orange1.1g007683m.v1.1;pacid=18091753	55	-	0.461065	TATAAACCTTGTTTACCTG	7.76449e-06	NI-N*-NI-NI-NI-HD-HD-NG-HD-NG-NG-NG-NG-NS-HD-HD-NG-NG	PthA4
orange1.1g007709m.v1.1;pacid=18091754	55	-	0.461065	TATAAACCTTGTTTACCTG	7.76449e-06	NI-N*-NI-NI-NI-HD-HD-NG-HD-NG-NG-NG-NG-NS-HD-HD-NG-NG	PthA4
orange1.1g012403m.v1.1;pacid=18091755	55	-	0.461065	TATAAACCTTGTTTACCTG	7.76449e-06	NI-N*-NI-NI-NI-HD-HD-NG-HD-NG-NG-NG-NG-NS-HD-HD-NG-NG	PthA4
orange1.1g034936m.v1.1;pacid=18120140	216	+	0.460775	TGCAAACCTCTCTTAGCTT	7.84518e-06	NI-N*-NI-NI-NI-HD-HD-NG-HD-NG-NG-NG-NG-NS-HD-HD-NG-NG	PthA4
orange1.1g036843m.v1.1;pacid=18105611	80	-	0.460264	TATAAAACTATTTTGTCAT	7.98915e-06	NI-N*-NI-NI-NI-HD-HD-NG-HD-NG-NG-NG-NG-NS-HD-HD-NG-NG	PthA4
orange1.1g000695m.v1.1;pacid=18136023	42	+	0.460208	TTTAATCCTCATTTAACTT	8.00517e-06	NI-N*-NI-NI-NI-HD-HD-NG-HD-NG-NG-NG-NG-NS-HD-HD-NG-NG	PthA4
orange1.1g024093m.v1.1;pacid=18125759	339	-	0.460102	CATAAACCCCCTTTAACTT	8.03534e-06	NI-N*-NI-NI-NI-HD-HD-NG-HD-NG-NG-NG-NG-NS-HD-HD-NG-NG	PthA4
orange1.1g028296m.v1.1;pacid=18125760	339	-	0.460102	CATAAACCCCCTTTAACTT	8.03534e-06	NI-N*-NI-NI-NI-HD-HD-NG-HD-NG-NG-NG-NG-NS-HD-HD-NG-NG	PthA4
orange1.1g031283m.v1.1;pacid=18125761	339	-	0.460102	CATAAACCCCCTTTAACTT	8.03534e-06	NI-N*-NI-NI-NI-HD-HD-NG-HD-NG-NG-NG-NG-NS-HD-HD-NG-NG	PthA4
orange1.1g011204m.v1.1;pacid=18113743	97	+	0.459402	TATAAACCCATTTCACATT	8.23789e-06	NI-N*-NI-NI-NI-HD-HD-NG-HD-NG-NG-NG-NG-NS-HD-HD-NG-NG	PthA4
orange1.1g014647m.v1.1;pacid=18113744	97	+	0.459402	TATAAACCCATTTCACATT	8.23789e-06	NI-N*-NI-NI-NI-HD-HD-NG-HD-NG-NG-NG-NG-NS-HD-HD-NG-NG	PthA4
orange1.1g018853m.v1.1;pacid=18113745	97	+	0.459402	TATAAACCCATTTCACATT	8.23789e-06	NI-N*-NI-NI-NI-HD-HD-NG-HD-NG-NG-NG-NG-NS-HD-HD-NG-NG	PthA4
orange1.1g006754m.v1.1;pacid=18105305	341	-	0.459252	TAGAAGCCTCTTCTTCCTC	8.28205e-06	NI-N*-NI-NI-NI-HD-HD-NG-HD-NG-NG-NG-NG-NS-HD-HD-NG-NG	PthA4
orange1.1g006832m.v1.1;pacid=18105306	341	-	0.459252	TAGAAGCCTCTTCTTCCTC	8.28205e-06	NI-N*-NI-NI-NI-HD-HD-NG-HD-NG-NG-NG-NG-NS-HD-HD-NG-NG	PthA4
orange1.1g006856m.v1.1;pacid=18105307	341	-	0.459252	TAGAAGCCTCTTCTTCCTC	8.28205e-06	NI-N*-NI-NI-NI-HD-HD-NG-HD-NG-NG-NG-NG-NS-HD-HD-NG-NG	PthA4
orange1.1g008193m.v1.1;pacid=18105308	341	-	0.459252	TAGAAGCCTCTTCTTCCTC	8.28205e-06	NI-N*-NI-NI-NI-HD-HD-NG-HD-NG-NG-NG-NG-NS-HD-HD-NG-NG	PthA4
orange1.1g021737m.v1.1;pacid=18091921	38	-	0.458824	TATTACCCTATTTTGCCAT	8.40876e-06	NI-N*-NI-NI-NI-HD-HD-NG-HD-NG-NG-NG-NG-NS-HD-HD-NG-NG	PthA4
orange1.1g048552m.v1.1;pacid=18096185	227	+	0.458521	TACAAAACACTCTCTCCTT	8.49977e-06	NI-N*-NI-NI-NI-HD-HD-NG-HD-NG-NG-NG-NG-NS-HD-HD-NG-NG	PthA4
orange1.1g040492m.v1.1;pacid=18127658	145	+	0.458283	TACAAAAATATTTTCTCTT	8.57167e-06	NI-N*-NI-NI-NI-HD-HD-NG-HD-NG-NG-NG-NG-NS-HD-HD-NG-NG	PthA4
orange1.1g020772m.v1.1;pacid=18108921	335	+	0.45769	TCCAAAACCCATTTCCCTT	8.7539e-06	NI-N*-NI-NI-NI-HD-HD-NG-HD-NG-NG-NG-NG-NS-HD-HD-NG-NG	PthA4
orange1.1g026910m.v1.1;pacid=18108924	335	+	0.45769	TCCAAAACCCATTTCCCTT	8.7539e-06	NI-N*-NI-NI-NI-HD-HD-NG-HD-NG-NG-NG-NG-NS-HD-HD-NG-NG	PthA4
orange1.1g020027m.v1.1;pacid=18112858	290	+	0.457523	AAAAAACTTCTTCTCCCTT	8.80594e-06	NI-N*-NI-NI-NI-HD-HD-NG-HD-NG-NG-NG-NG-NS-HD-HD-NG-NG	PthA4
orange1.1g006655m.v1.1;pacid=18103753	430	-	0.457381	AAAAAACTTCTTTTCACTT	8.8502e-06	NI-N*-NI-NI-NI-HD-HD-NG-HD-NG-NG-NG-NG-NS-HD-HD-NG-NG	PthA4
orange1.1g006671m.v1.1;pacid=18103754	423	-	0.457381	AAAAAACTTCTTTTCACTT	8.8502e-06	NI-N*-NI-NI-NI-HD-HD-NG-HD-NG-NG-NG-NG-NS-HD-HD-NG-NG	PthA4
orange1.1g006848m.v1.1;pacid=18103755	430	-	0.457381	AAAAAACTTCTTTTCACTT	8.8502e-06	NI-N*-NI-NI-NI-HD-HD-NG-HD-NG-NG-NG-NG-NS-HD-HD-NG-NG	PthA4
orange1.1g007820m.v1.1;pacid=18103756	423	-	0.457381	AAAAAACTTCTTTTCACTT	8.8502e-06	NI-N*-NI-NI-NI-HD-HD-NG-HD-NG-NG-NG-NG-NS-HD-HD-NG-NG	PthA4
orange1.1g008128m.v1.1;pacid=18103757	430	-	0.457381	AAAAAACTTCTTTTCACTT	8.8502e-06	NI-N*-NI-NI-NI-HD-HD-NG-HD-NG-NG-NG-NG-NS-HD-HD-NG-NG	PthA4
orange1.1g010384m.v1.1;pacid=18103758	430	-	0.457381	AAAAAACTTCTTTTCACTT	8.8502e-06	NI-N*-NI-NI-NI-HD-HD-NG-HD-NG-NG-NG-NG-NS-HD-HD-NG-NG	PthA4
orange1.1g025788m.v1.1;pacid=18118697	88	+	0.457313	TGCATACCTCTTTTAACTA	8.87156e-06	NI-N*-NI-NI-NI-HD-HD-NG-HD-NG-NG-NG-NG-NS-HD-HD-NG-NG	PthA4
orange1.1g037739m.v1.1;pacid=18129096	105	+	0.457239	CTTCAATCTCTTTTGCCTT	8.89493e-06	NI-N*-NI-NI-NI-HD-HD-NG-HD-NG-NG-NG-NG-NS-HD-HD-NG-NG	PthA4
orange1.1g047949m.v1.1;pacid=18117198	50	-	0.457045	AATAAATCTCTTTTCCTTT	8.95618e-06	NI-N*-NI-NI-NI-HD-HD-NG-HD-NG-NG-NG-NG-NS-HD-HD-NG-NG	PthA4
orange1.1g044056m.v1.1;pacid=18130259	225	+	0.456968	TTTATTCCTATTTTGCCTT	8.98058e-06	NI-N*-NI-NI-NI-HD-HD-NG-HD-NG-NG-NG-NG-NS-HD-HD-NG-NG	PthA4
orange1.1g039432m.v1.1;pacid=18101730	157	+	0.456298	TATAAAAATTTTTTGCCAT	9.19584e-06	NI-N*-NI-NI-NI-HD-HD-NG-HD-NG-NG-NG-NG-NS-HD-HD-NG-NG	PthA4
orange1.1g048420m.v1.1;pacid=18115433	225	+	0.456259	TACAAACATATATTGCTTT	9.20848e-06	NI-N*-NI-NI-NI-HD-HD-NG-HD-NG-NG-NG-NG-NS-HD-HD-NG-NG	PthA4
orange1.1g031074m.v1.1;pacid=18127423	326	+	0.455846	TAAAATCTGCTTTTACCTT	9.34405e-06	NI-N*-NI-NI-NI-HD-HD-NG-HD-NG-NG-NG-NG-NS-HD-HD-NG-NG	PthA4
orange1.1g031059m.v1.1;pacid=18127424	326	+	0.455846	TAAAATCTGCTTTTACCTT	9.34405e-06	NI-N*-NI-NI-NI-HD-HD-NG-HD-NG-NG-NG-NG-NS-HD-HD-NG-NG	PthA4
orange1.1g031076m.v1.1;pacid=18127425	326	+	0.455846	TAAAATCTGCTTTTACCTT	9.34405e-06	NI-N*-NI-NI-NI-HD-HD-NG-HD-NG-NG-NG-NG-NS-HD-HD-NG-NG	PthA4
orange1.1g031085m.v1.1;pacid=18127426	326	+	0.455846	TAAAATCTGCTTTTACCTT	9.34405e-06	NI-N*-NI-NI-NI-HD-HD-NG-HD-NG-NG-NG-NG-NS-HD-HD-NG-NG	PthA4
orange1.1g031093m.v1.1;pacid=18127428	326	+	0.455846	TAAAATCTGCTTTTACCTT	9.34405e-06	NI-N*-NI-NI-NI-HD-HD-NG-HD-NG-NG-NG-NG-NS-HD-HD-NG-NG	PthA4
orange1.1g035178m.v1.1;pacid=18120180	225	+	0.45563	TATAAACATCTTCAGCCAT	9.4157e-06	NI-N*-NI-NI-NI-HD-HD-NG-HD-NG-NG-NG-NG-NS-HD-HD-NG-NG	PthA4
orange1.1g039990m.v1.1;pacid=18117736	44	+	0.455458	CTTAAACCTATTTTTCTTT	9.47288e-06	NI-N*-NI-NI-NI-HD-HD-NG-HD-NG-NG-NG-NG-NS-HD-HD-NG-NG	PthA4
orange1.1g013530m.v1.1;pacid=18131733	292	+	0.455354	TAAAAAACACTTTTAAATT	9.50787e-06	NI-N*-NI-NI-NI-HD-HD-NG-HD-NG-NG-NG-NG-NS-HD-HD-NG-NG	PthA4
orange1.1g020567m.v1.1;pacid=18134018	39	-	0.455276	TATAAACCGCTATTTTCTT	9.53393e-06	NI-N*-NI-NI-NI-HD-HD-NG-HD-NG-NG-NG-NG-NS-HD-HD-NG-NG	PthA4
orange1.1g029405m.v1.1;pacid=18128655	123	+	0.455202	TAAGAATCTCATTTTCCTT	9.55874e-06	NI-N*-NI-NI-NI-HD-HD-NG-HD-NG-NG-NG-NG-NS-HD-HD-NG-NG	PthA4
orange1.1g030268m.v1.1;pacid=18128658	123	+	0.455202	TAAGAATCTCATTTTCCTT	9.55874e-06	NI-N*-NI-NI-NI-HD-HD-NG-HD-NG-NG-NG-NG-NS-HD-HD-NG-NG	PthA4
orange1.1g042153m.v1.1;pacid=18096042	54	+	0.455	TACCAACCCCTTTTAATTT	9.62735e-06	NI-N*-NI-NI-NI-HD-HD-NG-HD-NG-NG-NG-NG-NS-HD-HD-NG-NG	PthA4
orange1.1g027511m.v1.1;pacid=18121362	222	-	0.454781	TACATAGCACTTTTGCCTT	9.70187e-06	NI-N*-NI-NI-NI-HD-HD-NG-HD-NG-NG-NG-NG-NS-HD-HD-NG-NG	PthA4
orange1.1g030899m.v1.1;pacid=18121363	104	-	0.454781	TACATAGCACTTTTGCCTT	9.70187e-06	NI-N*-NI-NI-NI-HD-HD-NG-HD-NG-NG-NG-NG-NS-HD-HD-NG-NG	PthA4
orange1.1g038639m.v1.1;pacid=18103746	118	+	0.454639	TATTAATCTATTTTGCCTC	9.75044e-06	NI-N*-NI-NI-NI-HD-HD-NG-HD-NG-NG-NG-NG-NS-HD-HD-NG-NG	PthA4
orange1.1g006757m.v1.1;pacid=18098579	124	+	0.454365	TAAAAACAAATTTTAACTT	9.8452e-06	NI-N*-NI-NI-NI-HD-HD-NG-HD-NG-NG-NG-NG-NS-HD-HD-NG-NG	PthA4
orange1.1g006804m.v1.1;pacid=18098580	124	+	0.454365	TAAAAACAAATTTTAACTT	9.8452e-06	NI-N*-NI-NI-NI-HD-HD-NG-HD-NG-NG-NG-NG-NS-HD-HD-NG-NG	PthA4
orange1.1g006881m.v1.1;pacid=18098581	124	+	0.454365	TAAAAACAAATTTTAACTT	9.8452e-06	NI-N*-NI-NI-NI-HD-HD-NG-HD-NG-NG-NG-NG-NS-HD-HD-NG-NG	PthA4
orange1.1g007013m.v1.1;pacid=18098582	124	+	0.454365	TAAAAACAAATTTTAACTT	9.8452e-06	NI-N*-NI-NI-NI-HD-HD-NG-HD-NG-NG-NG-NG-NS-HD-HD-NG-NG	PthA4
orange1.1g010035m.v1.1;pacid=18098583	124	+	0.454365	TAAAAACAAATTTTAACTT	9.8452e-06	NI-N*-NI-NI-NI-HD-HD-NG-HD-NG-NG-NG-NG-NS-HD-HD-NG-NG	PthA4
orange1.1g010464m.v1.1;pacid=18098584	124	+	0.454365	TAAAAACAAATTTTAACTT	9.8452e-06	NI-N*-NI-NI-NI-HD-HD-NG-HD-NG-NG-NG-NG-NS-HD-HD-NG-NG	PthA4
orange1.1g011576m.v1.1;pacid=18098585	124	+	0.454365	TAAAAACAAATTTTAACTT	9.8452e-06	NI-N*-NI-NI-NI-HD-HD-NG-HD-NG-NG-NG-NG-NS-HD-HD-NG-NG	PthA4
orange1.1g010003m.v1.1;pacid=18138985	371	-	0.454139	AAGGAACCTCTTTTGCTTT	9.92405e-06	NI-N*-NI-NI-NI-HD-HD-NG-HD-NG-NG-NG-NG-NS-HD-HD-NG-NG	PthA4
orange1.1g010007m.v1.1;pacid=18138986	371	-	0.454139	AAGGAACCTCTTTTGCTTT	9.92405e-06	NI-N*-NI-NI-NI-HD-HD-NG-HD-NG-NG-NG-NG-NS-HD-HD-NG-NG	PthA4
orange1.1g014029m.v1.1;pacid=18117599	141	+	0.453179	TTCAAAACTCTCTTGTCTT	1.02648e-05	NI-N*-NI-NI-NI-HD-HD-NG-HD-NG-NG-NG-NG-NS-HD-HD-NG-NG	PthA4
orange1.1g016617m.v1.1;pacid=18121197	153	-	0.453116	TAAAACCCTCTCTTTCCTG	1.02878e-05	NI-N*-NI-NI-NI-HD-HD-NG-HD-NG-NG-NG-NG-NS-HD-HD-NG-NG	PthA4
orange1.1g017735m.v1.1;pacid=18121198	137	-	0.453116	TAAAACCCTCTCTTTCCTG	1.02878e-05	NI-N*-NI-NI-NI-HD-HD-NG-HD-NG-NG-NG-NG-NS-HD-HD-NG-NG	PthA4
orange1.1g021295m.v1.1;pacid=18121199	305	-	0.453116	TAAAACCCTCTCTTTCCTG	1.02878e-05	NI-N*-NI-NI-NI-HD-HD-NG-HD-NG-NG-NG-NG-NS-HD-HD-NG-NG	PthA4
orange1.1g023632m.v1.1;pacid=18121200	137	-	0.453116	TAAAACCCTCTCTTTCCTG	1.02878e-05	NI-N*-NI-NI-NI-HD-HD-NG-HD-NG-NG-NG-NG-NS-HD-HD-NG-NG	PthA4
orange1.1g034380m.v1.1;pacid=18116678	164	-	0.453035	TACATACATATTTTACCAT	1.03173e-05	NI-N*-NI-NI-NI-HD-HD-NG-HD-NG-NG-NG-NG-NS-HD-HD-NG-NG	PthA4
orange1.1g011676m.v1.1;pacid=18095372	291	+	0.453025	TATAATCCTCTATACACTT	1.03207e-05	NI-N*-NI-NI-NI-HD-HD-NG-HD-NG-NG-NG-NG-NS-HD-HD-NG-NG	PthA4
orange1.1g011698m.v1.1;pacid=18095373	291	+	0.453025	TATAATCCTCTATACACTT	1.03207e-05	NI-N*-NI-NI-NI-HD-HD-NG-HD-NG-NG-NG-NG-NS-HD-HD-NG-NG	PthA4
orange1.1g016037m.v1.1;pacid=18095374	291	+	0.453025	TATAATCCTCTATACACTT	1.03207e-05	NI-N*-NI-NI-NI-HD-HD-NG-HD-NG-NG-NG-NG-NS-HD-HD-NG-NG	PthA4
orange1.1g022853m.v1.1;pacid=18095375	291	+	0.453025	TATAATCCTCTATACACTT	1.03207e-05	NI-N*-NI-NI-NI-HD-HD-NG-HD-NG-NG-NG-NG-NS-HD-HD-NG-NG	PthA4
orange1.1g048287m.v1.1;pacid=18134525	184	+	0.453006	TACAATCCTAAATTTCCTT	1.03277e-05	NI-N*-NI-NI-NI-HD-HD-NG-HD-NG-NG-NG-NG-NS-HD-HD-NG-NG	PthA4
orange1.1g013984m.v1.1;pacid=18113935	215	+	0.452906	TCTAAACCTCTTATTAATT	1.03641e-05	NI-N*-NI-NI-NI-HD-HD-NG-HD-NG-NG-NG-NG-NS-HD-HD-NG-NG	PthA4
orange1.1g019937m.v1.1;pacid=18113936	215	+	0.452906	TCTAAACCTCTTATTAATT	1.03641e-05	NI-N*-NI-NI-NI-HD-HD-NG-HD-NG-NG-NG-NG-NS-HD-HD-NG-NG	PthA4
orange1.1g002400m.v1.1;pacid=18116152	164	+	0.451696	TAAAAACCTCCATTTTCTT	1.08138e-05	NI-N*-NI-NI-NI-HD-HD-NG-HD-NG-NG-NG-NG-NS-HD-HD-NG-NG	PthA4
orange1.1g027312m.v1.1;pacid=18112451	193	-	0.451533	AAAAAAATTCTTTTTCCTT	1.08757e-05	NI-N*-NI-NI-NI-HD-HD-NG-HD-NG-NG-NG-NG-NS-HD-HD-NG-NG	PthA4
orange1.1g028639m.v1.1;pacid=18112452	193	-	0.451533	AAAAAAATTCTTTTTCCTT	1.08757e-05	NI-N*-NI-NI-NI-HD-HD-NG-HD-NG-NG-NG-NG-NS-HD-HD-NG-NG	PthA4
orange1.1g030872m.v1.1;pacid=18112453	193	-	0.451533	AAAAAAATTCTTTTTCCTT	1.08757e-05	NI-N*-NI-NI-NI-HD-HD-NG-HD-NG-NG-NG-NG-NS-HD-HD-NG-NG	PthA4
orange1.1g030855m.v1.1;pacid=18112454	193	-	0.451533	AAAAAAATTCTTTTTCCTT	1.08757e-05	NI-N*-NI-NI-NI-HD-HD-NG-HD-NG-NG-NG-NG-NS-HD-HD-NG-NG	PthA4
orange1.1g032381m.v1.1;pacid=18112455	193	-	0.451533	AAAAAAATTCTTTTTCCTT	1.08757e-05	NI-N*-NI-NI-NI-HD-HD-NG-HD-NG-NG-NG-NG-NS-HD-HD-NG-NG	PthA4
orange1.1g040262m.v1.1;pacid=18120622	269	+	0.451306	TCAAAACCTTTTGTTCCTT	1.09627e-05	NI-N*-NI-NI-NI-HD-HD-NG-HD-NG-NG-NG-NG-NS-HD-HD-NG-NG	PthA4
orange1.1g018649m.v1.1;pacid=18091556	249	+	0.451073	TATAACCCCATTTTATCTT	1.10527e-05	NI-N*-NI-NI-NI-HD-HD-NG-HD-NG-NG-NG-NG-NS-HD-HD-NG-NG	PthA4
orange1.1g039173m.v1.1;pacid=18097430	73	-	0.45096	TACAAATTTCTGTTTCCTT	1.10964e-05	NI-N*-NI-NI-NI-HD-HD-NG-HD-NG-NG-NG-NG-NS-HD-HD-NG-NG	PthA4
orange1.1g041121m.v1.1;pacid=18127125	21	+	0.450843	CAAACAACTCTTTTATCTT	1.11421e-05	NI-N*-NI-NI-NI-HD-HD-NG-HD-NG-NG-NG-NG-NS-HD-HD-NG-NG	PthA4
orange1.1g015969m.v1.1;pacid=18112298	54	+	0.450835	CAAAAACCTCTTCCGCCTA	1.11451e-05	NI-N*-NI-NI-NI-HD-HD-NG-HD-NG-NG-NG-NG-NS-HD-HD-NG-NG	PthA4
orange1.1g029685m.v1.1;pacid=18123203	220	-	0.450731	TACAAATTTCTTTTTCTTT	1.1186e-05	NI-N*-NI-NI-NI-HD-HD-NG-HD-NG-NG-NG-NG-NS-HD-HD-NG-NG	PthA4
orange1.1g029707m.v1.1;pacid=18123204	220	-	0.450731	TACAAATTTCTTTTTCTTT	1.1186e-05	NI-N*-NI-NI-NI-HD-HD-NG-HD-NG-NG-NG-NG-NS-HD-HD-NG-NG	PthA4
orange1.1g029698m.v1.1;pacid=18123205	220	-	0.450731	TACAAATTTCTTTTTCTTT	1.1186e-05	NI-N*-NI-NI-NI-HD-HD-NG-HD-NG-NG-NG-NG-NS-HD-HD-NG-NG	PthA4
orange1.1g030495m.v1.1;pacid=18123206	220	-	0.450731	TACAAATTTCTTTTTCTTT	1.1186e-05	NI-N*-NI-NI-NI-HD-HD-NG-HD-NG-NG-NG-NG-NS-HD-HD-NG-NG	PthA4
orange1.1g028441m.v1.1;pacid=18114376	257	+	0.450454	CGCAACCCTCTGTTCCCTT	1.12948e-05	NI-N*-NI-NI-NI-HD-HD-NG-HD-NG-NG-NG-NG-NS-HD-HD-NG-NG	PthA4
orange1.1g011526m.v1.1;pacid=18132203	222	+	0.450401	TAGATACCACTTTTGACAT	1.13159e-05	NI-N*-NI-NI-NI-HD-HD-NG-HD-NG-NG-NG-NG-NS-HD-HD-NG-NG	PthA4
orange1.1g038793m.v1.1;pacid=18120917	29	-	0.450306	TATAGCCCTCTTTTAAATT	1.13535e-05	NI-N*-NI-NI-NI-HD-HD-NG-HD-NG-NG-NG-NG-NS-HD-HD-NG-NG	PthA4
orange1.1g028712m.v1.1;pacid=18110209	233	+	0.450235	CATATATCTCATTTCCCTT	1.13819e-05	NI-N*-NI-NI-NI-HD-HD-NG-HD-NG-NG-NG-NG-NS-HD-HD-NG-NG	PthA4
orange1.1g005987m.v1.1;pacid=18098624	213	+	0.449781	TAAATACCTCTTGTCCGTT	1.1564e-05	NI-N*-NI-NI-NI-HD-HD-NG-HD-NG-NG-NG-NG-NS-HD-HD-NG-NG	PthA4
orange1.1g009072m.v1.1;pacid=18098625	213	+	0.449781	TAAATACCTCTTGTCCGTT	1.1564e-05	NI-N*-NI-NI-NI-HD-HD-NG-HD-NG-NG-NG-NG-NS-HD-HD-NG-NG	PthA4
orange1.1g037294m.v1.1;pacid=18138202	171	-	0.449435	TAGAAACCTCCTGACCCTT	1.17049e-05	NI-N*-NI-NI-NI-HD-HD-NG-HD-NG-NG-NG-NG-NS-HD-HD-NG-NG	PthA4
orange1.1g024608m.v1.1;pacid=18096285	243	-	0.449416	TTTATACCACTTTTGACTT	1.17123e-05	NI-N*-NI-NI-NI-HD-HD-NG-HD-NG-NG-NG-NG-NS-HD-HD-NG-NG	PthA4
orange1.1g021888m.v1.1;pacid=18138126	311	+	0.449398	TAACAACCTTTTTTTTCTT	1.17198e-05	NI-N*-NI-NI-NI-HD-HD-NG-HD-NG-NG-NG-NG-NS-HD-HD-NG-NG	PthA4
orange1.1g040044m.v1.1;pacid=18134464	41	-	0.449325	TATACACCACTTTCACCAT	1.17499e-05	NI-N*-NI-NI-NI-HD-HD-NG-HD-NG-NG-NG-NG-NS-HD-HD-NG-NG	PthA4
orange1.1g040131m.v1.1;pacid=18128366	34	+	0.449262	AACATACTTCTTTTGACTT	1.17757e-05	NI-N*-NI-NI-NI-HD-HD-NG-HD-NG-NG-NG-NG-NS-HD-HD-NG-NG	PthA4
orange1.1g026884m.v1.1;pacid=18124874	136	-	0.449164	TATAAACCTTTTTTTTTTT	1.1816e-05	NI-N*-NI-NI-NI-HD-HD-NG-HD-NG-NG-NG-NG-NS-HD-HD-NG-NG	PthA4
orange1.1g006151m.v1.1;pacid=18107587	296	-	0.448792	TACAACACACATTTTCCTT	1.19706e-05	NI-N*-NI-NI-NI-HD-HD-NG-HD-NG-NG-NG-NG-NS-HD-HD-NG-NG	PthA4
orange1.1g037015m.v1.1;pacid=18105989	18	+	0.448768	TCTCAACCTCTCTTTCCAT	1.19805e-05	NI-N*-NI-NI-NI-HD-HD-NG-HD-NG-NG-NG-NG-NS-HD-HD-NG-NG	PthA4
orange1.1g017947m.v1.1;pacid=18128179	198	+	0.448749	CACAAATCTTTTTTTACTT	1.19883e-05	NI-N*-NI-NI-NI-HD-HD-NG-HD-NG-NG-NG-NG-NS-HD-HD-NG-NG	PthA4
orange1.1g024672m.v1.1;pacid=18128180	198	+	0.448749	CACAAATCTTTTTTTACTT	1.19883e-05	NI-N*-NI-NI-NI-HD-HD-NG-HD-NG-NG-NG-NG-NS-HD-HD-NG-NG	PthA4
orange1.1g017011m.v1.1;pacid=18125859	99	+	0.448581	GAAAAGACTCTTTTCCCTT	1.20591e-05	NI-N*-NI-NI-NI-HD-HD-NG-HD-NG-NG-NG-NG-NS-HD-HD-NG-NG	PthA4
orange1.1g037138m.v1.1;pacid=18116737	112	+	0.448345	TAAAAACACATTTTGACTT	1.21588e-05	NI-N*-NI-NI-NI-HD-HD-NG-HD-NG-NG-NG-NG-NS-HD-HD-NG-NG	PthA4
orange1.1g011903m.v1.1;pacid=18137382	303	-	0.448019	TACAATCCTCCATTGACTT	1.22978e-05	NI-N*-NI-NI-NI-HD-HD-NG-HD-NG-NG-NG-NG-NS-HD-HD-NG-NG	PthA4
orange1.1g041863m.v1.1;pacid=18128852	222	+	0.447971	CAAAAACTTCTTTTAAATT	1.23183e-05	NI-N*-NI-NI-NI-HD-HD-NG-HD-NG-NG-NG-NG-NS-HD-HD-NG-NG	PthA4
orange1.1g021740m.v1.1;pacid=18099667	246	+	0.447944	CTTAAACATCTTTTTCATT	1.233e-05	NI-N*-NI-NI-NI-HD-HD-NG-HD-NG-NG-NG-NG-NS-HD-HD-NG-NG	PthA4
orange1.1g026805m.v1.1;pacid=18099668	246	+	0.447944	CTTAAACATCTTTTTCATT	1.233e-05	NI-N*-NI-NI-NI-HD-HD-NG-HD-NG-NG-NG-NG-NS-HD-HD-NG-NG	PthA4
orange1.1g011458m.v1.1;pacid=18135243	260	+	0.44781	AACAAAACTCTTTTATCTA	1.23878e-05	NI-N*-NI-NI-NI-HD-HD-NG-HD-NG-NG-NG-NG-NS-HD-HD-NG-NG	PthA4
orange1.1g011610m.v1.1;pacid=18135244	260	+	0.44781	AACAAAACTCTTTTATCTA	1.23878e-05	NI-N*-NI-NI-NI-HD-HD-NG-HD-NG-NG-NG-NG-NS-HD-HD-NG-NG	PthA4
orange1.1g001531m.v1.1;pacid=18096521	188	+	0.447782	CAACAACCCCATTTGCCTT	1.23996e-05	NI-N*-NI-NI-NI-HD-HD-NG-HD-NG-NG-NG-NG-NS-HD-HD-NG-NG	PthA4
orange1.1g001533m.v1.1;pacid=18096522	188	+	0.447782	CAACAACCCCATTTGCCTT	1.23996e-05	NI-N*-NI-NI-NI-HD-HD-NG-HD-NG-NG-NG-NG-NS-HD-HD-NG-NG	PthA4
orange1.1g001579m.v1.1;pacid=18096523	188	+	0.447782	CAACAACCCCATTTGCCTT	1.23996e-05	NI-N*-NI-NI-NI-HD-HD-NG-HD-NG-NG-NG-NG-NS-HD-HD-NG-NG	PthA4
orange1.1g001586m.v1.1;pacid=18096524	188	+	0.447782	CAACAACCCCATTTGCCTT	1.23996e-05	NI-N*-NI-NI-NI-HD-HD-NG-HD-NG-NG-NG-NG-NS-HD-HD-NG-NG	PthA4
orange1.1g001769m.v1.1;pacid=18096525	188	+	0.447782	CAACAACCCCATTTGCCTT	1.23996e-05	NI-N*-NI-NI-NI-HD-HD-NG-HD-NG-NG-NG-NG-NS-HD-HD-NG-NG	PthA4
orange1.1g001989m.v1.1;pacid=18096526	188	+	0.447782	CAACAACCCCATTTGCCTT	1.23996e-05	NI-N*-NI-NI-NI-HD-HD-NG-HD-NG-NG-NG-NG-NS-HD-HD-NG-NG	PthA4
orange1.1g001990m.v1.1;pacid=18096527	188	+	0.447782	CAACAACCCCATTTGCCTT	1.23996e-05	NI-N*-NI-NI-NI-HD-HD-NG-HD-NG-NG-NG-NG-NS-HD-HD-NG-NG	PthA4
orange1.1g002263m.v1.1;pacid=18096528	423	+	0.447782	CAACAACCCCATTTGCCTT	1.23996e-05	NI-N*-NI-NI-NI-HD-HD-NG-HD-NG-NG-NG-NG-NS-HD-HD-NG-NG	PthA4
orange1.1g024395m.v1.1;pacid=18130907	27	-	0.447588	TCCACACATCTTCTGCCTT	1.2484e-05	NI-N*-NI-NI-NI-HD-HD-NG-HD-NG-NG-NG-NG-NS-HD-HD-NG-NG	PthA4
orange1.1g029033m.v1.1;pacid=18098842	184	-	0.447566	TATAAACCAATTTTTACTG	1.24934e-05	NI-N*-NI-NI-NI-HD-HD-NG-HD-NG-NG-NG-NG-NS-HD-HD-NG-NG	PthA4
orange1.1g029568m.v1.1;pacid=18098843	184	-	0.447566	TATAAACCAATTTTTACTG	1.24934e-05	NI-N*-NI-NI-NI-HD-HD-NG-HD-NG-NG-NG-NG-NS-HD-HD-NG-NG	PthA4
orange1.1g034998m.v1.1;pacid=18134533	6	-	0.447436	TATAATCATATTTTACCTA	1.25501e-05	NI-N*-NI-NI-NI-HD-HD-NG-HD-NG-NG-NG-NG-NS-HD-HD-NG-NG	PthA4
orange1.1g007077m.v1.1;pacid=18096301	73	-	0.447367	TTAAAACATCTTTTTCATT	1.25801e-05	NI-N*-NI-NI-NI-HD-HD-NG-HD-NG-NG-NG-NG-NS-HD-HD-NG-NG	PthA4
orange1.1g047239m.v1.1;pacid=18095469	67	+	0.447068	AACAAACCCCTTTTGATTT	1.2712e-05	NI-N*-NI-NI-NI-HD-HD-NG-HD-NG-NG-NG-NG-NS-HD-HD-NG-NG	PthA4
orange1.1g021229m.v1.1;pacid=18107569	192	+	0.446965	CAAAAACCCCTTTTGATTT	1.27577e-05	NI-N*-NI-NI-NI-HD-HD-NG-HD-NG-NG-NG-NG-NS-HD-HD-NG-NG	PthA4
orange1.1g012054m.v1.1;pacid=18114714	63	+	0.44688	TCCAAACCACCTTTCCCTC	1.27954e-05	NI-N*-NI-NI-NI-HD-HD-NG-HD-NG-NG-NG-NG-NS-HD-HD-NG-NG	PthA4
orange1.1g013304m.v1.1;pacid=18114715	63	+	0.44688	TCCAAACCACCTTTCCCTC	1.27954e-05	NI-N*-NI-NI-NI-HD-HD-NG-HD-NG-NG-NG-NG-NS-HD-HD-NG-NG	PthA4
orange1.1g008153m.v1.1;pacid=18115164	268	+	0.446724	CACAAACCACCTTTTCTTT	1.28651e-05	NI-N*-NI-NI-NI-HD-HD-NG-HD-NG-NG-NG-NG-NS-HD-HD-NG-NG	PthA4
orange1.1g016581m.v1.1;pacid=18131865	47	+	0.446719	TATAAACATCAGTCGCCTT	1.28673e-05	NI-N*-NI-NI-NI-HD-HD-NG-HD-NG-NG-NG-NG-NS-HD-HD-NG-NG	PthA4
orange1.1g048145m.v1.1;pacid=18098419	42	-	0.446099	TCTAAACAACTTTTGCCTC	1.31475e-05	NI-N*-NI-NI-NI-HD-HD-NG-HD-NG-NG-NG-NG-NS-HD-HD-NG-NG	PthA4
orange1.1g007570m.v1.1;pacid=18108533	144	-	0.445791	AAGAAACCTCCTTTTCATT	1.3289e-05	NI-N*-NI-NI-NI-HD-HD-NG-HD-NG-NG-NG-NG-NS-HD-HD-NG-NG	PthA4
orange1.1g019303m.v1.1;pacid=18104457	9	-	0.445746	TAAAAACGTATTTTTCTTT	1.33099e-05	NI-N*-NI-NI-NI-HD-HD-NG-HD-NG-NG-NG-NG-NS-HD-HD-NG-NG	PthA4
orange1.1g021097m.v1.1;pacid=18104458	9	-	0.445746	TAAAAACGTATTTTTCTTT	1.33099e-05	NI-N*-NI-NI-NI-HD-HD-NG-HD-NG-NG-NG-NG-NS-HD-HD-NG-NG	PthA4
orange1.1g025658m.v1.1;pacid=18104459	9	-	0.445746	TAAAAACGTATTTTTCTTT	1.33099e-05	NI-N*-NI-NI-NI-HD-HD-NG-HD-NG-NG-NG-NG-NS-HD-HD-NG-NG	PthA4
orange1.1g025364m.v1.1;pacid=18137714	220	+	0.445487	TACAAATTTCTTTTGAATT	1.34302e-05	NI-N*-NI-NI-NI-HD-HD-NG-HD-NG-NG-NG-NG-NS-HD-HD-NG-NG	PthA4
orange1.1g024003m.v1.1;pacid=18137280	255	-	0.445385	CACAATCCTCTTTTATATT	1.34778e-05	NI-N*-NI-NI-NI-HD-HD-NG-HD-NG-NG-NG-NG-NS-HD-HD-NG-NG	PthA4
orange1.1g024375m.v1.1;pacid=18137281	255	-	0.445385	CACAATCCTCTTTTATATT	1.34778e-05	NI-N*-NI-NI-NI-HD-HD-NG-HD-NG-NG-NG-NG-NS-HD-HD-NG-NG	PthA4
orange1.1g024758m.v1.1;pacid=18137282	255	-	0.445385	CACAATCCTCTTTTATATT	1.34778e-05	NI-N*-NI-NI-NI-HD-HD-NG-HD-NG-NG-NG-NG-NS-HD-HD-NG-NG	PthA4
orange1.1g027701m.v1.1;pacid=18137283	255	-	0.445385	CACAATCCTCTTTTATATT	1.34778e-05	NI-N*-NI-NI-NI-HD-HD-NG-HD-NG-NG-NG-NG-NS-HD-HD-NG-NG	PthA4
orange1.1g027798m.v1.1;pacid=18137284	272	-	0.445385	CACAATCCTCTTTTATATT	1.34778e-05	NI-N*-NI-NI-NI-HD-HD-NG-HD-NG-NG-NG-NG-NS-HD-HD-NG-NG	PthA4
orange1.1g000216m.v1.1;pacid=18093272	132	-	0.445222	TAGAAACCTCTTTATCTCT	1.35544e-05	NI-N*-NI-NI-NI-HD-HD-NG-HD-NG-NG-NG-NG-NS-HD-HD-NG-NG	PthA4
orange1.1g039746m.v1.1;pacid=18114133	149	+	0.445156	TATAAGACTCTTTATCATT	1.35851e-05	NI-N*-NI-NI-NI-HD-HD-NG-HD-NG-NG-NG-NG-NS-HD-HD-NG-NG	PthA4
orange1.1g035925m.v1.1;pacid=18123371	134	+	0.444938	TATTTACCTCCTTTACCAT	1.36885e-05	NI-N*-NI-NI-NI-HD-HD-NG-HD-NG-NG-NG-NG-NS-HD-HD-NG-NG	PthA4
orange1.1g001004m.v1.1;pacid=18106441	406	+	0.444689	CTTGATCCTCTTTTTCCTT	1.38071e-05	NI-N*-NI-NI-NI-HD-HD-NG-HD-NG-NG-NG-NG-NS-HD-HD-NG-NG	PthA4
orange1.1g036505m.v1.1;pacid=18112269	200	+	0.444637	TATAAACCTCTTATACACA	1.38319e-05	NI-N*-NI-NI-NI-HD-HD-NG-HD-NG-NG-NG-NG-NS-HD-HD-NG-NG	PthA4
orange1.1g036863m.v1.1;pacid=18106317	200	+	0.444637	TATAAACCTCTTATACACA	1.38319e-05	NI-N*-NI-NI-NI-HD-HD-NG-HD-NG-NG-NG-NG-NS-HD-HD-NG-NG	PthA4
orange1.1g033656m.v1.1;pacid=18092406	7	-	0.444567	TGAAAACTTCTTTTGCTTT	1.38655e-05	NI-N*-NI-NI-NI-HD-HD-NG-HD-NG-NG-NG-NG-NS-HD-HD-NG-NG	PthA4
orange1.1g034862m.v1.1;pacid=18092407	7	-	0.444567	TGAAAACTTCTTTTGCTTT	1.38655e-05	NI-N*-NI-NI-NI-HD-HD-NG-HD-NG-NG-NG-NG-NS-HD-HD-NG-NG	PthA4
orange1.1g029250m.v1.1;pacid=18105810	278	+	0.444274	TACGATAATCTTTTTCCTT	1.40071e-05	NI-N*-NI-NI-NI-HD-HD-NG-HD-NG-NG-NG-NG-NS-HD-HD-NG-NG	PthA4
orange1.1g029798m.v1.1;pacid=18105813	278	+	0.444274	TACGATAATCTTTTTCCTT	1.40071e-05	NI-N*-NI-NI-NI-HD-HD-NG-HD-NG-NG-NG-NG-NS-HD-HD-NG-NG	PthA4
orange1.1g041003m.v1.1;pacid=18118705	55	-	0.444174	TATATAACTACTTTTCCTT	1.40558e-05	NI-N*-NI-NI-NI-HD-HD-NG-HD-NG-NG-NG-NG-NS-HD-HD-NG-NG	PthA4
orange1.1g044337m.v1.1;pacid=18130874	256	+	0.444072	TTAAAATCTTTTTTCCCTT	1.41054e-05	NI-N*-NI-NI-NI-HD-HD-NG-HD-NG-NG-NG-NG-NS-HD-HD-NG-NG	PthA4
orange1.1g011106m.v1.1;pacid=18128774	226	+	0.444059	TAAAAACCTCATTCAAATT	1.41116e-05	NI-N*-NI-NI-NI-HD-HD-NG-HD-NG-NG-NG-NG-NS-HD-HD-NG-NG	PthA4
orange1.1g006091m.v1.1;pacid=18115573	96	-	0.443865	TACAGACCTCATATGCCAT	1.42069e-05	NI-N*-NI-NI-NI-HD-HD-NG-HD-NG-NG-NG-NG-NS-HD-HD-NG-NG	PthA4
orange1.1g007370m.v1.1;pacid=18115574	96	-	0.443865	TACAGACCTCATATGCCAT	1.42069e-05	NI-N*-NI-NI-NI-HD-HD-NG-HD-NG-NG-NG-NG-NS-HD-HD-NG-NG	PthA4
orange1.1g009139m.v1.1;pacid=18115576	96	-	0.443865	TACAGACCTCATATGCCAT	1.42069e-05	NI-N*-NI-NI-NI-HD-HD-NG-HD-NG-NG-NG-NG-NS-HD-HD-NG-NG	PthA4
orange1.1g034123m.v1.1;pacid=18108788	82	-	0.443611	TAATAACCTTTCTTTCCTT	1.43325e-05	NI-N*-NI-NI-NI-HD-HD-NG-HD-NG-NG-NG-NG-NS-HD-HD-NG-NG	PthA4
orange1.1g042357m.v1.1;pacid=18096786	209	+	0.443236	CATGAACCATTTTTTCCTT	1.45194e-05	NI-N*-NI-NI-NI-HD-HD-NG-HD-NG-NG-NG-NG-NS-HD-HD-NG-NG	PthA4
orange1.1g042992m.v1.1;pacid=18102525	62	+	0.443166	TACAAACTCATTTTGCTTT	1.45545e-05	NI-N*-NI-NI-NI-HD-HD-NG-HD-NG-NG-NG-NG-NS-HD-HD-NG-NG	PthA4
orange1.1g038857m.v1.1;pacid=18132295	111	+	0.443049	TACAAAAATCTTCTTCTTT	1.46134e-05	NI-N*-NI-NI-NI-HD-HD-NG-HD-NG-NG-NG-NG-NS-HD-HD-NG-NG	PthA4
orange1.1g048190m.v1.1;pacid=18124088	142	-	0.442739	TATAAACATATTTTTACTG	1.47711e-05	NI-N*-NI-NI-NI-HD-HD-NG-HD-NG-NG-NG-NG-NS-HD-HD-NG-NG	PthA4
orange1.1g014662m.v1.1;pacid=18127669	319	+	0.44272	TATATTCCACTTTTGCTTT	1.47806e-05	NI-N*-NI-NI-NI-HD-HD-NG-HD-NG-NG-NG-NG-NS-HD-HD-NG-NG	PthA4
orange1.1g014687m.v1.1;pacid=18127670	319	+	0.44272	TATATTCCACTTTTGCTTT	1.47806e-05	NI-N*-NI-NI-NI-HD-HD-NG-HD-NG-NG-NG-NG-NS-HD-HD-NG-NG	PthA4
orange1.1g015947m.v1.1;pacid=18127671	319	+	0.44272	TATATTCCACTTTTGCTTT	1.47806e-05	NI-N*-NI-NI-NI-HD-HD-NG-HD-NG-NG-NG-NG-NS-HD-HD-NG-NG	PthA4
orange1.1g016166m.v1.1;pacid=18127672	319	+	0.44272	TATATTCCACTTTTGCTTT	1.47806e-05	NI-N*-NI-NI-NI-HD-HD-NG-HD-NG-NG-NG-NG-NS-HD-HD-NG-NG	PthA4
orange1.1g022701m.v1.1;pacid=18127673	319	+	0.44272	TATATTCCACTTTTGCTTT	1.47806e-05	NI-N*-NI-NI-NI-HD-HD-NG-HD-NG-NG-NG-NG-NS-HD-HD-NG-NG	PthA4
orange1.1g023005m.v1.1;pacid=18127674	319	+	0.44272	TATATTCCACTTTTGCTTT	1.47806e-05	NI-N*-NI-NI-NI-HD-HD-NG-HD-NG-NG-NG-NG-NS-HD-HD-NG-NG	PthA4
orange1.1g015028m.v1.1;pacid=18103792	23	+	0.442514	TACACGCCTCTTTAGTCTT	1.48863e-05	NI-N*-NI-NI-NI-HD-HD-NG-HD-NG-NG-NG-NG-NS-HD-HD-NG-NG	PthA4
orange1.1g036831m.v1.1;pacid=18130460	18	+	0.442138	TAAAATGCTCTTTTCACTT	1.5081e-05	NI-N*-NI-NI-NI-HD-HD-NG-HD-NG-NG-NG-NG-NS-HD-HD-NG-NG	PthA4
orange1.1g025321m.v1.1;pacid=18115431	132	+	0.442137	TATCAACCACCGTTACCTT	1.50814e-05	NI-N*-NI-NI-NI-HD-HD-NG-HD-NG-NG-NG-NG-NS-HD-HD-NG-NG	PthA4
orange1.1g021528m.v1.1;pacid=18121789	231	+	0.442047	CCAAACCCTCTTTTTCCAT	1.51279e-05	NI-N*-NI-NI-NI-HD-HD-NG-HD-NG-NG-NG-NG-NS-HD-HD-NG-NG	PthA4
orange1.1g026413m.v1.1;pacid=18121790	231	+	0.442047	CCAAACCCTCTTTTTCCAT	1.51279e-05	NI-N*-NI-NI-NI-HD-HD-NG-HD-NG-NG-NG-NG-NS-HD-HD-NG-NG	PthA4
orange1.1g024186m.v1.1;pacid=18094474	363	+	0.441975	TTTTATCCTCTTTTTACTT	1.51659e-05	NI-N*-NI-NI-NI-HD-HD-NG-HD-NG-NG-NG-NG-NS-HD-HD-NG-NG	PthA4
orange1.1g024177m.v1.1;pacid=18094475	363	+	0.441975	TTTTATCCTCTTTTTACTT	1.51659e-05	NI-N*-NI-NI-NI-HD-HD-NG-HD-NG-NG-NG-NG-NS-HD-HD-NG-NG	PthA4
orange1.1g027638m.v1.1;pacid=18094476	363	+	0.441975	TTTTATCCTCTTTTTACTT	1.51659e-05	NI-N*-NI-NI-NI-HD-HD-NG-HD-NG-NG-NG-NG-NS-HD-HD-NG-NG	PthA4
orange1.1g027599m.v1.1;pacid=18094477	363	+	0.441975	TTTTATCCTCTTTTTACTT	1.51659e-05	NI-N*-NI-NI-NI-HD-HD-NG-HD-NG-NG-NG-NG-NS-HD-HD-NG-NG	PthA4
orange1.1g027424m.v1.1;pacid=18117127	254	+	0.441973	TACAGAATTCTTTTCCATT	1.51666e-05	NI-N*-NI-NI-NI-HD-HD-NG-HD-NG-NG-NG-NG-NS-HD-HD-NG-NG	PthA4
orange1.1g030847m.v1.1;pacid=18130774	281	+	0.441795	CTTAAACCTCTTCTTTCTT	1.52602e-05	NI-N*-NI-NI-NI-HD-HD-NG-HD-NG-NG-NG-NG-NS-HD-HD-NG-NG	PthA4
orange1.1g035526m.v1.1;pacid=18123494	187	+	0.441607	CAGAAACCGATTTTGCTTT	1.53597e-05	NI-N*-NI-NI-NI-HD-HD-NG-HD-NG-NG-NG-NG-NS-HD-HD-NG-NG	PthA4
orange1.1g032697m.v1.1;pacid=18135486	224	+	0.441588	CTTATATCTCTTTTCCCTT	1.53698e-05	NI-N*-NI-NI-NI-HD-HD-NG-HD-NG-NG-NG-NG-NS-HD-HD-NG-NG	PthA4
orange1.1g039029m.v1.1;pacid=18123364	171	-	0.441528	CAAGAAAATCTTTTGCCTT	1.54016e-05	NI-N*-NI-NI-NI-HD-HD-NG-HD-NG-NG-NG-NG-NS-HD-HD-NG-NG	PthA4
orange1.1g045658m.v1.1;pacid=18132019	64	+	0.441286	TCTTAACTTATTTTTCCTT	1.55306e-05	NI-N*-NI-NI-NI-HD-HD-NG-HD-NG-NG-NG-NG-NS-HD-HD-NG-NG	PthA4
orange1.1g025649m.v1.1;pacid=18112314	234	-	0.441115	TAGAAACATTTTTTTCCCT	1.5622e-05	NI-N*-NI-NI-NI-HD-HD-NG-HD-NG-NG-NG-NG-NS-HD-HD-NG-NG	PthA4
orange1.1g042059m.v1.1;pacid=18128493	15	-	0.441049	TACTAAAATCTTTTACCTG	1.56576e-05	NI-N*-NI-NI-NI-HD-HD-NG-HD-NG-NG-NG-NG-NS-HD-HD-NG-NG	PthA4
orange1.1g034017m.v1.1;pacid=18097417	35	+	0.440563	TATCGAACTCTTTTTCTTT	1.59222e-05	NI-N*-NI-NI-NI-HD-HD-NG-HD-NG-NG-NG-NG-NS-HD-HD-NG-NG	PthA4
orange1.1g034021m.v1.1;pacid=18097418	35	+	0.440563	TATCGAACTCTTTTTCTTT	1.59222e-05	NI-N*-NI-NI-NI-HD-HD-NG-HD-NG-NG-NG-NG-NS-HD-HD-NG-NG	PthA4
orange1.1g033994m.v1.1;pacid=18097419	35	+	0.440563	TATCGAACTCTTTTTCTTT	1.59222e-05	NI-N*-NI-NI-NI-HD-HD-NG-HD-NG-NG-NG-NG-NS-HD-HD-NG-NG	PthA4
orange1.1g034000m.v1.1;pacid=18097420	35	+	0.440563	TATCGAACTCTTTTTCTTT	1.59222e-05	NI-N*-NI-NI-NI-HD-HD-NG-HD-NG-NG-NG-NG-NS-HD-HD-NG-NG	PthA4
orange1.1g034058m.v1.1;pacid=18097421	35	+	0.440563	TATCGAACTCTTTTTCTTT	1.59222e-05	NI-N*-NI-NI-NI-HD-HD-NG-HD-NG-NG-NG-NG-NS-HD-HD-NG-NG	PthA4
orange1.1g034039m.v1.1;pacid=18097422	35	+	0.440563	TATCGAACTCTTTTTCTTT	1.59222e-05	NI-N*-NI-NI-NI-HD-HD-NG-HD-NG-NG-NG-NG-NS-HD-HD-NG-NG	PthA4
orange1.1g044931m.v1.1;pacid=18097432	170	+	0.440432	ATCCAACATCTTTTACCTT	1.59942e-05	NI-N*-NI-NI-NI-HD-HD-NG-HD-NG-NG-NG-NG-NS-HD-HD-NG-NG	PthA4
orange1.1g033266m.v1.1;pacid=18103122	179	+	0.440168	CAAAAACATCTGTTCACTT	1.61397e-05	NI-N*-NI-NI-NI-HD-HD-NG-HD-NG-NG-NG-NG-NS-HD-HD-NG-NG	PthA4
orange1.1g007779m.v1.1;pacid=18101667	363	+	0.440067	CATAAAAATATTTTGCATT	1.6196e-05	NI-N*-NI-NI-NI-HD-HD-NG-HD-NG-NG-NG-NG-NS-HD-HD-NG-NG	PthA4
orange1.1g007783m.v1.1;pacid=18101668	363	+	0.440067	CATAAAAATATTTTGCATT	1.6196e-05	NI-N*-NI-NI-NI-HD-HD-NG-HD-NG-NG-NG-NG-NS-HD-HD-NG-NG	PthA4
orange1.1g008923m.v1.1;pacid=18101669	363	+	0.440067	CATAAAAATATTTTGCATT	1.6196e-05	NI-N*-NI-NI-NI-HD-HD-NG-HD-NG-NG-NG-NG-NS-HD-HD-NG-NG	PthA4
orange1.1g009838m.v1.1;pacid=18101670	363	+	0.440067	CATAAAAATATTTTGCATT	1.6196e-05	NI-N*-NI-NI-NI-HD-HD-NG-HD-NG-NG-NG-NG-NS-HD-HD-NG-NG	PthA4
orange1.1g009818m.v1.1;pacid=18101671	363	+	0.440067	CATAAAAATATTTTGCATT	1.6196e-05	NI-N*-NI-NI-NI-HD-HD-NG-HD-NG-NG-NG-NG-NS-HD-HD-NG-NG	PthA4
orange1.1g013432m.v1.1;pacid=18101672	363	+	0.440067	CATAAAAATATTTTGCATT	1.6196e-05	NI-N*-NI-NI-NI-HD-HD-NG-HD-NG-NG-NG-NG-NS-HD-HD-NG-NG	PthA4
orange1.1g014848m.v1.1;pacid=18101673	363	+	0.440067	CATAAAAATATTTTGCATT	1.6196e-05	NI-N*-NI-NI-NI-HD-HD-NG-HD-NG-NG-NG-NG-NS-HD-HD-NG-NG	PthA4
orange1.1g047969m.v1.1;pacid=18139186	23	-	0.440034	TACAACTCTATTTTCCCAT	1.62147e-05	NI-N*-NI-NI-NI-HD-HD-NG-HD-NG-NG-NG-NG-NS-HD-HD-NG-NG	PthA4
orange1.1g047199m.v1.1;pacid=18097632	32	-	0.440034	TACAACTCTATTTTCCCAT	1.62147e-05	NI-N*-NI-NI-NI-HD-HD-NG-HD-NG-NG-NG-NG-NS-HD-HD-NG-NG	PthA4
orange1.1g040849m.v1.1;pacid=18130118	218	+	0.439884	TACAAACATAGTTTATCTT	1.62986e-05	NI-N*-NI-NI-NI-HD-HD-NG-HD-NG-NG-NG-NG-NS-HD-HD-NG-NG	PthA4
orange1.1g024457m.v1.1;pacid=18123194	239	+	0.439743	CAAAAACCTCATTTGTCTA	1.63775e-05	NI-N*-NI-NI-NI-HD-HD-NG-HD-NG-NG-NG-NG-NS-HD-HD-NG-NG	PthA4
orange1.1g043311m.v1.1;pacid=18129968	106	-	0.439682	TTTAAACCTATTTGACCTC	1.6412e-05	NI-N*-NI-NI-NI-HD-HD-NG-HD-NG-NG-NG-NG-NS-HD-HD-NG-NG	PthA4
orange1.1g012088m.v1.1;pacid=18107126	130	+	0.439561	AAAAAAACTCTTTTGATTT	1.64803e-05	NI-N*-NI-NI-NI-HD-HD-NG-HD-NG-NG-NG-NG-NS-HD-HD-NG-NG	PthA4
orange1.1g016357m.v1.1;pacid=18107127	159	+	0.439561	AAAAAAACTCTTTTGATTT	1.64803e-05	NI-N*-NI-NI-NI-HD-HD-NG-HD-NG-NG-NG-NG-NS-HD-HD-NG-NG	PthA4
orange1.1g018553m.v1.1;pacid=18107128	130	+	0.439561	AAAAAAACTCTTTTGATTT	1.64803e-05	NI-N*-NI-NI-NI-HD-HD-NG-HD-NG-NG-NG-NG-NS-HD-HD-NG-NG	PthA4
orange1.1g003237m.v1.1;pacid=18114711	244	+	0.439526	CAGCAACCTCTATTGCGTT	1.65001e-05	NI-N*-NI-NI-NI-HD-HD-NG-HD-NG-NG-NG-NG-NS-HD-HD-NG-NG	PthA4
orange1.1g004501m.v1.1;pacid=18114712	244	+	0.439526	CAGCAACCTCTATTGCGTT	1.65001e-05	NI-N*-NI-NI-NI-HD-HD-NG-HD-NG-NG-NG-NG-NS-HD-HD-NG-NG	PthA4
orange1.1g005471m.v1.1;pacid=18114713	244	+	0.439526	CAGCAACCTCTATTGCGTT	1.65001e-05	NI-N*-NI-NI-NI-HD-HD-NG-HD-NG-NG-NG-NG-NS-HD-HD-NG-NG	PthA4
orange1.1g011048m.v1.1;pacid=18096814	86	+	0.439502	AACCAACATCTTCTCCCTT	1.65136e-05	NI-N*-NI-NI-NI-HD-HD-NG-HD-NG-NG-NG-NG-NS-HD-HD-NG-NG	PthA4
orange1.1g035203m.v1.1;pacid=18135803	159	+	0.43943	TGAAAAACTCTTTTGATTT	1.65544e-05	NI-N*-NI-NI-NI-HD-HD-NG-HD-NG-NG-NG-NG-NS-HD-HD-NG-NG	PthA4
orange1.1g026669m.v1.1;pacid=18137327	102	-	0.439414	CACAAAATTCTTTTTCTTT	1.65638e-05	NI-N*-NI-NI-NI-HD-HD-NG-HD-NG-NG-NG-NG-NS-HD-HD-NG-NG	PthA4
orange1.1g026699m.v1.1;pacid=18137328	102	-	0.439414	CACAAAATTCTTTTTCTTT	1.65638e-05	NI-N*-NI-NI-NI-HD-HD-NG-HD-NG-NG-NG-NG-NS-HD-HD-NG-NG	PthA4
orange1.1g007114m.v1.1;pacid=18135248	330	-	0.439262	AACGAAAATCTTTTACCTT	1.66507e-05	NI-N*-NI-NI-NI-HD-HD-NG-HD-NG-NG-NG-NG-NS-HD-HD-NG-NG	PthA4
orange1.1g035937m.v1.1;pacid=18139697	41	+	0.439228	TACGAAATTCTCTTTCCTT	1.66699e-05	NI-N*-NI-NI-NI-HD-HD-NG-HD-NG-NG-NG-NG-NS-HD-HD-NG-NG	PthA4
orange1.1g009059m.v1.1;pacid=18097122	51	-	0.439058	TAAAAAAATATTTTTACTT	1.67677e-05	NI-N*-NI-NI-NI-HD-HD-NG-HD-NG-NG-NG-NG-NS-HD-HD-NG-NG	PthA4
orange1.1g025648m.v1.1;pacid=18107554	85	-	0.438984	TACCAACAACTTTTCCCAT	1.68104e-05	NI-N*-NI-NI-NI-HD-HD-NG-HD-NG-NG-NG-NG-NS-HD-HD-NG-NG	PthA4
orange1.1g015573m.v1.1;pacid=18102159	68	+	0.438797	TACATTCCTCTTTACCATT	1.69182e-05	NI-N*-NI-NI-NI-HD-HD-NG-HD-NG-NG-NG-NG-NS-HD-HD-NG-NG	PthA4
orange1.1g009028m.v1.1;pacid=18092688	241	-	0.438742	CAAACACATATTTTCCCTT	1.69505e-05	NI-N*-NI-NI-NI-HD-HD-NG-HD-NG-NG-NG-NG-NS-HD-HD-NG-NG	PthA4
orange1.1g026081m.v1.1;pacid=18127691	165	-	0.438737	TATTAACATCTTTTAATTT	1.69535e-05	NI-N*-NI-NI-NI-HD-HD-NG-HD-NG-NG-NG-NG-NS-HD-HD-NG-NG	PthA4
orange1.1g019669m.v1.1;pacid=18108218	288	-	0.438615	TACAAACAACTTTTCACTG	1.70241e-05	NI-N*-NI-NI-NI-HD-HD-NG-HD-NG-NG-NG-NG-NS-HD-HD-NG-NG	PthA4
orange1.1g008366m.v1.1;pacid=18103872	213	+	0.438415	TTCTATCCTCTTTTCCCAT	1.71418e-05	NI-N*-NI-NI-NI-HD-HD-NG-HD-NG-NG-NG-NG-NS-HD-HD-NG-NG	PthA4
orange1.1g023212m.v1.1;pacid=18123781	113	-	0.437987	CACCAATCTCTCTTTCCTT	1.7395e-05	NI-N*-NI-NI-NI-HD-HD-NG-HD-NG-NG-NG-NG-NS-HD-HD-NG-NG	PthA4
orange1.1g023267m.v1.1;pacid=18123782	93	-	0.437987	CACCAATCTCTCTTTCCTT	1.7395e-05	NI-N*-NI-NI-NI-HD-HD-NG-HD-NG-NG-NG-NG-NS-HD-HD-NG-NG	PthA4
orange1.1g046825m.v1.1;pacid=18128003	133	+	0.437933	TAAAAACCCAATTTTACTT	1.74273e-05	NI-N*-NI-NI-NI-HD-HD-NG-HD-NG-NG-NG-NG-NS-HD-HD-NG-NG	PthA4
orange1.1g034014m.v1.1;pacid=18135716	167	+	0.437775	TACAAAAATTTATTTCCTT	1.75218e-05	NI-N*-NI-NI-NI-HD-HD-NG-HD-NG-NG-NG-NG-NS-HD-HD-NG-NG	PthA4
orange1.1g033998m.v1.1;pacid=18135717	167	+	0.437775	TACAAAAATTTATTTCCTT	1.75218e-05	NI-N*-NI-NI-NI-HD-HD-NG-HD-NG-NG-NG-NG-NS-HD-HD-NG-NG	PthA4
orange1.1g034336m.v1.1;pacid=18135718	167	+	0.437775	TACAAAAATTTATTTCCTT	1.75218e-05	NI-N*-NI-NI-NI-HD-HD-NG-HD-NG-NG-NG-NG-NS-HD-HD-NG-NG	PthA4
orange1.1g034547m.v1.1;pacid=18135719	167	+	0.437775	TACAAAAATTTATTTCCTT	1.75218e-05	NI-N*-NI-NI-NI-HD-HD-NG-HD-NG-NG-NG-NG-NS-HD-HD-NG-NG	PthA4
orange1.1g034817m.v1.1;pacid=18135720	167	+	0.437775	TACAAAAATTTATTTCCTT	1.75218e-05	NI-N*-NI-NI-NI-HD-HD-NG-HD-NG-NG-NG-NG-NS-HD-HD-NG-NG	PthA4
orange1.1g048683m.v1.1;pacid=18135574	266	+	0.437648	CAAAAACCTCTTATACTTC	1.75981e-05	NI-N*-NI-NI-NI-HD-HD-NG-HD-NG-NG-NG-NG-NS-HD-HD-NG-NG	PthA4
orange1.1g027939m.v1.1;pacid=18099857	71	+	0.437639	TTGAATACACTTTTACCTT	1.76037e-05	NI-N*-NI-NI-NI-HD-HD-NG-HD-NG-NG-NG-NG-NS-HD-HD-NG-NG	PthA4
orange1.1g047218m.v1.1;pacid=18123814	182	+	0.437635	TGTAAAATTCTTTTGTCTT	1.76057e-05	NI-N*-NI-NI-NI-HD-HD-NG-HD-NG-NG-NG-NG-NS-HD-HD-NG-NG	PthA4
orange1.1g036811m.v1.1;pacid=18123853	180	+	0.437384	CACAAACCTCTTTCTTCGT	1.77578e-05	NI-N*-NI-NI-NI-HD-HD-NG-HD-NG-NG-NG-NG-NS-HD-HD-NG-NG	PthA4
orange1.1g009577m.v1.1;pacid=18103832	20	-	0.437344	CATAAACTTCTTCTTCCTC	1.77822e-05	NI-N*-NI-NI-NI-HD-HD-NG-HD-NG-NG-NG-NG-NS-HD-HD-NG-NG	PthA4
orange1.1g010818m.v1.1;pacid=18103833	20	-	0.437344	CATAAACTTCTTCTTCCTC	1.77822e-05	NI-N*-NI-NI-NI-HD-HD-NG-HD-NG-NG-NG-NG-NS-HD-HD-NG-NG	PthA4
orange1.1g031668m.v1.1;pacid=18093713	231	-	0.437225	CCCAAACTTCTTTTTCATT	1.78551e-05	NI-N*-NI-NI-NI-HD-HD-NG-HD-NG-NG-NG-NG-NS-HD-HD-NG-NG	PthA4
orange1.1g032694m.v1.1;pacid=18121379	155	-	0.437217	CACAAACAACTTTTTCTTT	1.78595e-05	NI-N*-NI-NI-NI-HD-HD-NG-HD-NG-NG-NG-NG-NS-HD-HD-NG-NG	PthA4
orange1.1g032828m.v1.1;pacid=18121366	155	-	0.437217	CACAAACAACTTTTTCTTT	1.78595e-05	NI-N*-NI-NI-NI-HD-HD-NG-HD-NG-NG-NG-NG-NS-HD-HD-NG-NG	PthA4
orange1.1g041352m.v1.1;pacid=18119516	40	-	0.436875	TATACACCACTTTTATCAT	1.80699e-05	NI-N*-NI-NI-NI-HD-HD-NG-HD-NG-NG-NG-NG-NS-HD-HD-NG-NG	PthA4
orange1.1g039806m.v1.1;pacid=18104667	12	-	0.436563	TATATACATATTTTATCTT	1.82636e-05	NI-N*-NI-NI-NI-HD-HD-NG-HD-NG-NG-NG-NG-NS-HD-HD-NG-NG	PthA4
orange1.1g009230m.v1.1;pacid=18138650	197	-	0.436348	TATAAAACACTCTTCTCTT	1.83984e-05	NI-N*-NI-NI-NI-HD-HD-NG-HD-NG-NG-NG-NG-NS-HD-HD-NG-NG	PthA4
orange1.1g006245m.v1.1;pacid=18111384	366	+	0.436003	TGTACTCCTCTTTGACCTT	1.86168e-05	NI-N*-NI-NI-NI-HD-HD-NG-HD-NG-NG-NG-NG-NS-HD-HD-NG-NG	PthA4
orange1.1g034104m.v1.1;pacid=18104272	0	+	0.435489	TAACAACCTTTTCTGACTT	1.89463e-05	NI-N*-NI-NI-NI-HD-HD-NG-HD-NG-NG-NG-NG-NS-HD-HD-NG-NG	PthA4
orange1.1g032000m.v1.1;pacid=18107714	240	+	0.435455	AATAACCCTCCTTTCCCTC	1.89679e-05	NI-N*-NI-NI-NI-HD-HD-NG-HD-NG-NG-NG-NG-NS-HD-HD-NG-NG	PthA4
orange1.1g033483m.v1.1;pacid=18107715	240	+	0.435455	AATAACCCTCCTTTCCCTC	1.89679e-05	NI-N*-NI-NI-NI-HD-HD-NG-HD-NG-NG-NG-NG-NS-HD-HD-NG-NG	PthA4
orange1.1g027006m.v1.1;pacid=18098526	285	-	0.435386	TCTCAATCTCTCTTGCCTT	1.90125e-05	NI-N*-NI-NI-NI-HD-HD-NG-HD-NG-NG-NG-NG-NS-HD-HD-NG-NG	PthA4
orange1.1g029057m.v1.1;pacid=18098527	285	-	0.435386	TCTCAATCTCTCTTGCCTT	1.90125e-05	NI-N*-NI-NI-NI-HD-HD-NG-HD-NG-NG-NG-NG-NS-HD-HD-NG-NG	PthA4
orange1.1g032141m.v1.1;pacid=18098528	285	-	0.435386	TCTCAATCTCTCTTGCCTT	1.90125e-05	NI-N*-NI-NI-NI-HD-HD-NG-HD-NG-NG-NG-NG-NS-HD-HD-NG-NG	PthA4
orange1.1g002100m.v1.1;pacid=18131649	383	-	0.43537	TTTAAAATTATTTTTCCTT	1.90232e-05	NI-N*-NI-NI-NI-HD-HD-NG-HD-NG-NG-NG-NG-NS-HD-HD-NG-NG	PthA4
orange1.1g043911m.v1.1;pacid=18132105	248	+	0.435098	TACAACTCTCATTCTCCTT	1.92003e-05	NI-N*-NI-NI-NI-HD-HD-NG-HD-NG-NG-NG-NG-NS-HD-HD-NG-NG	PthA4
orange1.1g046999m.v1.1;pacid=18124672	95	-	0.434987	TTTTAACCTCTTTTTACAT	1.92736e-05	NI-N*-NI-NI-NI-HD-HD-NG-HD-NG-NG-NG-NG-NS-HD-HD-NG-NG	PthA4
orange1.1g027157m.v1.1;pacid=18135329	348	+	0.43488	CATAAACTTCCTTTCTCTT	1.93434e-05	NI-N*-NI-NI-NI-HD-HD-NG-HD-NG-NG-NG-NG-NS-HD-HD-NG-NG	PthA4
orange1.1g044367m.v1.1;pacid=18122105	31	+	0.43488	CATAAACTTCCTTTCTCTT	1.93434e-05	NI-N*-NI-NI-NI-HD-HD-NG-HD-NG-NG-NG-NG-NS-HD-HD-NG-NG	PthA4
orange1.1g015265m.v1.1;pacid=18104503	304	-	0.434831	CAAAATTCTCTTTTGACTT	1.93759e-05	NI-N*-NI-NI-NI-HD-HD-NG-HD-NG-NG-NG-NG-NS-HD-HD-NG-NG	PthA4
orange1.1g018284m.v1.1;pacid=18104505	304	-	0.434831	CAAAATTCTCTTTTGACTT	1.93759e-05	NI-N*-NI-NI-NI-HD-HD-NG-HD-NG-NG-NG-NG-NS-HD-HD-NG-NG	PthA4
orange1.1g012458m.v1.1;pacid=18125721	131	+	0.434705	TTCAAACCCCTGTTACCTC	1.94597e-05	NI-N*-NI-NI-NI-HD-HD-NG-HD-NG-NG-NG-NG-NS-HD-HD-NG-NG	PthA4
orange1.1g012469m.v1.1;pacid=18125722	131	+	0.434705	TTCAAACCCCTGTTACCTC	1.94597e-05	NI-N*-NI-NI-NI-HD-HD-NG-HD-NG-NG-NG-NG-NS-HD-HD-NG-NG	PthA4
orange1.1g012927m.v1.1;pacid=18125723	131	+	0.434705	TTCAAACCCCTGTTACCTC	1.94597e-05	NI-N*-NI-NI-NI-HD-HD-NG-HD-NG-NG-NG-NG-NS-HD-HD-NG-NG	PthA4
orange1.1g016994m.v1.1;pacid=18125725	222	+	0.434705	TTCAAACCCCTGTTACCTC	1.94597e-05	NI-N*-NI-NI-NI-HD-HD-NG-HD-NG-NG-NG-NG-NS-HD-HD-NG-NG	PthA4
orange1.1g016969m.v1.1;pacid=18125726	222	+	0.434705	TTCAAACCCCTGTTACCTC	1.94597e-05	NI-N*-NI-NI-NI-HD-HD-NG-HD-NG-NG-NG-NG-NS-HD-HD-NG-NG	PthA4
orange1.1g017226m.v1.1;pacid=18125727	222	+	0.434705	TTCAAACCCCTGTTACCTC	1.94597e-05	NI-N*-NI-NI-NI-HD-HD-NG-HD-NG-NG-NG-NG-NS-HD-HD-NG-NG	PthA4
orange1.1g020470m.v1.1;pacid=18125728	222	+	0.434705	TTCAAACCCCTGTTACCTC	1.94597e-05	NI-N*-NI-NI-NI-HD-HD-NG-HD-NG-NG-NG-NG-NS-HD-HD-NG-NG	PthA4
orange1.1g025701m.v1.1;pacid=18125729	222	+	0.434705	TTCAAACCCCTGTTACCTC	1.94597e-05	NI-N*-NI-NI-NI-HD-HD-NG-HD-NG-NG-NG-NG-NS-HD-HD-NG-NG	PthA4
orange1.1g011087m.v1.1;pacid=18094188	294	+	0.434422	TTCGAACCACTTTTATCTT	1.96479e-05	NI-N*-NI-NI-NI-HD-HD-NG-HD-NG-NG-NG-NG-NS-HD-HD-NG-NG	PthA4
orange1.1g047121m.v1.1;pacid=18133694	215	+	0.434355	TAAAAACCGTTTTTTCTTT	1.96927e-05	NI-N*-NI-NI-NI-HD-HD-NG-HD-NG-NG-NG-NG-NS-HD-HD-NG-NG	PthA4
orange1.1g027084m.v1.1;pacid=18098368	425	-	0.434353	TTTCAAACTCTATTTCCTT	1.96941e-05	NI-N*-NI-NI-NI-HD-HD-NG-HD-NG-NG-NG-NG-NS-HD-HD-NG-NG	PthA4
orange1.1g027071m.v1.1;pacid=18098370	425	-	0.434353	TTTCAAACTCTATTTCCTT	1.96941e-05	NI-N*-NI-NI-NI-HD-HD-NG-HD-NG-NG-NG-NG-NS-HD-HD-NG-NG	PthA4
orange1.1g030360m.v1.1;pacid=18098371	425	-	0.434353	TTTCAAACTCTATTTCCTT	1.96941e-05	NI-N*-NI-NI-NI-HD-HD-NG-HD-NG-NG-NG-NG-NS-HD-HD-NG-NG	PthA4
orange1.1g031389m.v1.1;pacid=18131202	99	+	0.434327	AAAAAATCTATTTTAACTT	1.97117e-05	NI-N*-NI-NI-NI-HD-HD-NG-HD-NG-NG-NG-NG-NS-HD-HD-NG-NG	PthA4
orange1.1g001767m.v1.1;pacid=18133950	63	+	0.434243	TAGAACCATCTCTTGCCTA	1.97684e-05	NI-N*-NI-NI-NI-HD-HD-NG-HD-NG-NG-NG-NG-NS-HD-HD-NG-NG	PthA4
orange1.1g004275m.v1.1;pacid=18133952	63	+	0.434243	TAGAACCATCTCTTGCCTA	1.97684e-05	NI-N*-NI-NI-NI-HD-HD-NG-HD-NG-NG-NG-NG-NS-HD-HD-NG-NG	PthA4
orange1.1g048253m.v1.1;pacid=18116816	143	+	0.43406	TAGACACAACTTTTTACTT	1.98914e-05	NI-N*-NI-NI-NI-HD-HD-NG-HD-NG-NG-NG-NG-NS-HD-HD-NG-NG	PthA4
orange1.1g040633m.v1.1;pacid=18106297	41	+	0.433925	TAAAAAATTCTTTTAATTT	1.99833e-05	NI-N*-NI-NI-NI-HD-HD-NG-HD-NG-NG-NG-NG-NS-HD-HD-NG-NG	PthA4
orange1.1g019587m.v1.1;pacid=18124177	118	+	0.433883	TACATACATCTTGTCCCTC	2.00121e-05	NI-N*-NI-NI-NI-HD-HD-NG-HD-NG-NG-NG-NG-NS-HD-HD-NG-NG	PthA4
orange1.1g035420m.v1.1;pacid=18134344	249	+	0.433836	AATTCACTTCTTTTACCTT	2.00436e-05	NI-N*-NI-NI-NI-HD-HD-NG-HD-NG-NG-NG-NG-NS-HD-HD-NG-NG	PthA4
orange1.1g034420m.v1.1;pacid=18112217	198	+	0.433732	TTTTAACCATTTTTACCTT	2.01148e-05	NI-N*-NI-NI-NI-HD-HD-NG-HD-NG-NG-NG-NG-NS-HD-HD-NG-NG	PthA4
orange1.1g046178m.v1.1;pacid=18136292	242	+	0.433441	TACAAACCTTGTTTCACTA	2.03146e-05	NI-N*-NI-NI-NI-HD-HD-NG-HD-NG-NG-NG-NG-NS-HD-HD-NG-NG	PthA4
orange1.1g009722m.v1.1;pacid=18117438	164	+	0.433357	TATCATCCTTTTTTGCTTT	2.03728e-05	NI-N*-NI-NI-NI-HD-HD-NG-HD-NG-NG-NG-NG-NS-HD-HD-NG-NG	PthA4
orange1.1g002824m.v1.1;pacid=18126387	382	+	0.433335	TCTAAATCTCTTTTTATTT	2.03882e-05	NI-N*-NI-NI-NI-HD-HD-NG-HD-NG-NG-NG-NG-NS-HD-HD-NG-NG	PthA4
orange1.1g003658m.v1.1;pacid=18126388	382	+	0.433335	TCTAAATCTCTTTTTATTT	2.03882e-05	NI-N*-NI-NI-NI-HD-HD-NG-HD-NG-NG-NG-NG-NS-HD-HD-NG-NG	PthA4
orange1.1g004169m.v1.1;pacid=18126389	382	+	0.433335	TCTAAATCTCTTTTTATTT	2.03882e-05	NI-N*-NI-NI-NI-HD-HD-NG-HD-NG-NG-NG-NG-NS-HD-HD-NG-NG	PthA4
orange1.1g004523m.v1.1;pacid=18126390	382	+	0.433335	TCTAAATCTCTTTTTATTT	2.03882e-05	NI-N*-NI-NI-NI-HD-HD-NG-HD-NG-NG-NG-NG-NS-HD-HD-NG-NG	PthA4
orange1.1g038120m.v1.1;pacid=18120957	23	-	0.433212	TACAAACATCATTCACTTT	2.04734e-05	NI-N*-NI-NI-NI-HD-HD-NG-HD-NG-NG-NG-NG-NS-HD-HD-NG-NG	PthA4
orange1.1g022752m.v1.1;pacid=18131421	60	-	0.433197	TATAACCCTCTTTTTATTA	2.0484e-05	NI-N*-NI-NI-NI-HD-HD-NG-HD-NG-NG-NG-NG-NS-HD-HD-NG-NG	PthA4
orange1.1g023640m.v1.1;pacid=18131422	60	-	0.433197	TATAACCCTCTTTTTATTA	2.0484e-05	NI-N*-NI-NI-NI-HD-HD-NG-HD-NG-NG-NG-NG-NS-HD-HD-NG-NG	PthA4
orange1.1g045922m.v1.1;pacid=18135436	81	+	0.433195	CATTAATCTCTTTTTCTTT	2.04857e-05	NI-N*-NI-NI-NI-HD-HD-NG-HD-NG-NG-NG-NG-NS-HD-HD-NG-NG	PthA4
orange1.1g027898m.v1.1;pacid=18119421	142	-	0.433185	TATTAAATTCATTTCCCTT	2.04925e-05	NI-N*-NI-NI-NI-HD-HD-NG-HD-NG-NG-NG-NG-NS-HD-HD-NG-NG	PthA4
orange1.1g043184m.v1.1;pacid=18116033	91	+	0.433019	TATTTTCCTCTTCTTCCTT	2.06083e-05	NI-N*-NI-NI-NI-HD-HD-NG-HD-NG-NG-NG-NG-NS-HD-HD-NG-NG	PthA4
orange1.1g013939m.v1.1;pacid=18134541	433	+	0.432962	TATAACTCTCACTTTCCTT	2.0648e-05	NI-N*-NI-NI-NI-HD-HD-NG-HD-NG-NG-NG-NG-NS-HD-HD-NG-NG	PthA4
orange1.1g035762m.v1.1;pacid=18135760	15	+	0.432945	TATAAGCCTTTTTTACCCC	2.06605e-05	NI-N*-NI-NI-NI-HD-HD-NG-HD-NG-NG-NG-NG-NS-HD-HD-NG-NG	PthA4
orange1.1g042826m.v1.1;pacid=18099754	132	-	0.432882	CAGTTACCTCTCTTACCTT	2.07044e-05	NI-N*-NI-NI-NI-HD-HD-NG-HD-NG-NG-NG-NG-NS-HD-HD-NG-NG	PthA4
orange1.1g023737m.v1.1;pacid=18134959	54	+	0.43286	TATAATCCTCTTTTATACT	2.07198e-05	NI-N*-NI-NI-NI-HD-HD-NG-HD-NG-NG-NG-NG-NS-HD-HD-NG-NG	PthA4
orange1.1g024340m.v1.1;pacid=18134960	54	+	0.43286	TATAATCCTCTTTTATACT	2.07198e-05	NI-N*-NI-NI-NI-HD-HD-NG-HD-NG-NG-NG-NG-NS-HD-HD-NG-NG	PthA4
orange1.1g020374m.v1.1;pacid=18113515	8	-	0.432859	TTTAACCCACATTTCCCTT	2.07206e-05	NI-N*-NI-NI-NI-HD-HD-NG-HD-NG-NG-NG-NG-NS-HD-HD-NG-NG	PthA4
orange1.1g021572m.v1.1;pacid=18113516	8	-	0.432859	TTTAACCCACATTTCCCTT	2.07206e-05	NI-N*-NI-NI-NI-HD-HD-NG-HD-NG-NG-NG-NG-NS-HD-HD-NG-NG	PthA4
orange1.1g024662m.v1.1;pacid=18113517	8	-	0.432859	TTTAACCCACATTTCCCTT	2.07206e-05	NI-N*-NI-NI-NI-HD-HD-NG-HD-NG-NG-NG-NG-NS-HD-HD-NG-NG	PthA4
orange1.1g027382m.v1.1;pacid=18127976	476	-	0.432812	TATAAACCTAATTTCCTCT	2.07539e-05	NI-N*-NI-NI-NI-HD-HD-NG-HD-NG-NG-NG-NG-NS-HD-HD-NG-NG	PthA4
orange1.1g007132m.v1.1;pacid=18105570	196	+	0.432811	TTCAGACCTCTTTACCATT	2.07547e-05	NI-N*-NI-NI-NI-HD-HD-NG-HD-NG-NG-NG-NG-NS-HD-HD-NG-NG	PthA4
orange1.1g007197m.v1.1;pacid=18113873	100	+	0.432776	TCAAGACCTCTTTGGACTT	2.07793e-05	NI-N*-NI-NI-NI-HD-HD-NG-HD-NG-NG-NG-NG-NS-HD-HD-NG-NG	PthA4
orange1.1g006765m.v1.1;pacid=18099863	211	-	0.432735	AAAAAACCTTTTTTTCCCT	2.08078e-05	NI-N*-NI-NI-NI-HD-HD-NG-HD-NG-NG-NG-NG-NS-HD-HD-NG-NG	PthA4
orange1.1g039108m.v1.1;pacid=18135573	260	-	0.432593	TAGTCACCTGTTTTGCCTT	2.09088e-05	NI-N*-NI-NI-NI-HD-HD-NG-HD-NG-NG-NG-NG-NS-HD-HD-NG-NG	PthA4
orange1.1g042809m.v1.1;pacid=18109329	252	-	0.432399	AACCAACCACTTTTCCCTC	2.10471e-05	NI-N*-NI-NI-NI-HD-HD-NG-HD-NG-NG-NG-NG-NS-HD-HD-NG-NG	PthA4
orange1.1g006367m.v1.1;pacid=18126896	26	+	0.432315	TATCCGTCTCTTTTCCCTT	2.1107e-05	NI-N*-NI-NI-NI-HD-HD-NG-HD-NG-NG-NG-NG-NS-HD-HD-NG-NG	PthA4
orange1.1g006374m.v1.1;pacid=18126897	26	+	0.432315	TATCCGTCTCTTTTCCCTT	2.1107e-05	NI-N*-NI-NI-NI-HD-HD-NG-HD-NG-NG-NG-NG-NS-HD-HD-NG-NG	PthA4
orange1.1g006507m.v1.1;pacid=18126898	26	+	0.432315	TATCCGTCTCTTTTCCCTT	2.1107e-05	NI-N*-NI-NI-NI-HD-HD-NG-HD-NG-NG-NG-NG-NS-HD-HD-NG-NG	PthA4
orange1.1g007606m.v1.1;pacid=18126899	26	+	0.432315	TATCCGTCTCTTTTCCCTT	2.1107e-05	NI-N*-NI-NI-NI-HD-HD-NG-HD-NG-NG-NG-NG-NS-HD-HD-NG-NG	PthA4
orange1.1g008346m.v1.1;pacid=18126900	26	+	0.432315	TATCCGTCTCTTTTCCCTT	2.1107e-05	NI-N*-NI-NI-NI-HD-HD-NG-HD-NG-NG-NG-NG-NS-HD-HD-NG-NG	PthA4
orange1.1g014323m.v1.1;pacid=18126901	26	+	0.432315	TATCCGTCTCTTTTCCCTT	2.1107e-05	NI-N*-NI-NI-NI-HD-HD-NG-HD-NG-NG-NG-NG-NS-HD-HD-NG-NG	PthA4
orange1.1g016151m.v1.1;pacid=18134121	200	+	0.432286	TAAAGACCAATTTTCCCTC	2.11274e-05	NI-N*-NI-NI-NI-HD-HD-NG-HD-NG-NG-NG-NG-NS-HD-HD-NG-NG	PthA4
orange1.1g021239m.v1.1;pacid=18134122	200	+	0.432286	TAAAGACCAATTTTCCCTC	2.11274e-05	NI-N*-NI-NI-NI-HD-HD-NG-HD-NG-NG-NG-NG-NS-HD-HD-NG-NG	PthA4
orange1.1g024705m.v1.1;pacid=18134123	200	+	0.432286	TAAAGACCAATTTTCCCTC	2.11274e-05	NI-N*-NI-NI-NI-HD-HD-NG-HD-NG-NG-NG-NG-NS-HD-HD-NG-NG	PthA4
orange1.1g045246m.v1.1;pacid=18094611	201	-	0.432263	AAGAAACCTCTTTTTTTTT	2.11443e-05	NI-N*-NI-NI-NI-HD-HD-NG-HD-NG-NG-NG-NG-NS-HD-HD-NG-NG	PthA4
orange1.1g045414m.v1.1;pacid=18138488	126	+	0.432165	AAGTATCCTCTTTTAACTT	2.12145e-05	NI-N*-NI-NI-NI-HD-HD-NG-HD-NG-NG-NG-NG-NS-HD-HD-NG-NG	PthA4
orange1.1g029143m.v1.1;pacid=18109063	346	+	0.432105	TATCAACCTCTTTTCCTCA	2.12578e-05	NI-N*-NI-NI-NI-HD-HD-NG-HD-NG-NG-NG-NG-NS-HD-HD-NG-NG	PthA4
orange1.1g013265m.v1.1;pacid=18110182	114	-	0.431798	TTCAAACAGATTTTACCTT	2.148e-05	NI-N*-NI-NI-NI-HD-HD-NG-HD-NG-NG-NG-NG-NS-HD-HD-NG-NG	PthA4
orange1.1g012166m.v1.1;pacid=18129649	393	-	0.431639	TACAAACCATTTTTAAGTT	2.15963e-05	NI-N*-NI-NI-NI-HD-HD-NG-HD-NG-NG-NG-NG-NS-HD-HD-NG-NG	PthA4
orange1.1g014697m.v1.1;pacid=18129651	393	-	0.431639	TACAAACCATTTTTAAGTT	2.15963e-05	NI-N*-NI-NI-NI-HD-HD-NG-HD-NG-NG-NG-NG-NS-HD-HD-NG-NG	PthA4
orange1.1g014674m.v1.1;pacid=18129652	393	-	0.431639	TACAAACCATTTTTAAGTT	2.15963e-05	NI-N*-NI-NI-NI-HD-HD-NG-HD-NG-NG-NG-NG-NS-HD-HD-NG-NG	PthA4
orange1.1g015050m.v1.1;pacid=18129654	393	-	0.431639	TACAAACCATTTTTAAGTT	2.15963e-05	NI-N*-NI-NI-NI-HD-HD-NG-HD-NG-NG-NG-NG-NS-HD-HD-NG-NG	PthA4
orange1.1g015007m.v1.1;pacid=18129656	393	-	0.431639	TACAAACCATTTTTAAGTT	2.15963e-05	NI-N*-NI-NI-NI-HD-HD-NG-HD-NG-NG-NG-NG-NS-HD-HD-NG-NG	PthA4
orange1.1g023334m.v1.1;pacid=18119693	219	-	0.431629	TATAAATCTATCTTACTTT	2.16037e-05	NI-N*-NI-NI-NI-HD-HD-NG-HD-NG-NG-NG-NG-NS-HD-HD-NG-NG	PthA4
orange1.1g025622m.v1.1;pacid=18119694	219	-	0.431629	TATAAATCTATCTTACTTT	2.16037e-05	NI-N*-NI-NI-NI-HD-HD-NG-HD-NG-NG-NG-NG-NS-HD-HD-NG-NG	PthA4
orange1.1g027296m.v1.1;pacid=18119695	219	-	0.431629	TATAAATCTATCTTACTTT	2.16037e-05	NI-N*-NI-NI-NI-HD-HD-NG-HD-NG-NG-NG-NG-NS-HD-HD-NG-NG	PthA4
orange1.1g002922m.v1.1;pacid=18109850	82	-	0.431622	TACAATACACTTTTTCTTT	2.16092e-05	NI-N*-NI-NI-NI-HD-HD-NG-HD-NG-NG-NG-NG-NS-HD-HD-NG-NG	PthA4
orange1.1g002919m.v1.1;pacid=18109851	76	-	0.431622	TACAATACACTTTTTCTTT	2.16092e-05	NI-N*-NI-NI-NI-HD-HD-NG-HD-NG-NG-NG-NG-NS-HD-HD-NG-NG	PthA4
orange1.1g005213m.v1.1;pacid=18109853	147	-	0.431622	TACAATACACTTTTTCTTT	2.16092e-05	NI-N*-NI-NI-NI-HD-HD-NG-HD-NG-NG-NG-NG-NS-HD-HD-NG-NG	PthA4
orange1.1g005188m.v1.1;pacid=18109855	147	-	0.431622	TACAATACACTTTTTCTTT	2.16092e-05	NI-N*-NI-NI-NI-HD-HD-NG-HD-NG-NG-NG-NG-NS-HD-HD-NG-NG	PthA4
orange1.1g005208m.v1.1;pacid=18109856	147	-	0.431622	TACAATACACTTTTTCTTT	2.16092e-05	NI-N*-NI-NI-NI-HD-HD-NG-HD-NG-NG-NG-NG-NS-HD-HD-NG-NG	PthA4
orange1.1g005192m.v1.1;pacid=18109857	147	-	0.431622	TACAATACACTTTTTCTTT	2.16092e-05	NI-N*-NI-NI-NI-HD-HD-NG-HD-NG-NG-NG-NG-NS-HD-HD-NG-NG	PthA4
orange1.1g046730m.v1.1;pacid=18094168	144	+	0.431466	TAGAAAATTATATTTCCTT	2.17232e-05	NI-N*-NI-NI-NI-HD-HD-NG-HD-NG-NG-NG-NG-NS-HD-HD-NG-NG	PthA4
orange1.1g021112m.v1.1;pacid=18125084	136	+	0.431397	TATAAACATCCATTTCCTC	2.17742e-05	NI-N*-NI-NI-NI-HD-HD-NG-HD-NG-NG-NG-NG-NS-HD-HD-NG-NG	PthA4
orange1.1g019384m.v1.1;pacid=18131428	198	+	0.431294	TTCAAACCTCCTTTCCCCC	2.18503e-05	NI-N*-NI-NI-NI-HD-HD-NG-HD-NG-NG-NG-NG-NS-HD-HD-NG-NG	PthA4
orange1.1g037679m.v1.1;pacid=18126328	127	+	0.431266	AACAAAACTCTTATTCGTT	2.18713e-05	NI-N*-NI-NI-NI-HD-HD-NG-HD-NG-NG-NG-NG-NS-HD-HD-NG-NG	PthA4
orange1.1g034144m.v1.1;pacid=18124039	201	+	0.431263	TATAAACCCCTCCGCCCTT	2.18735e-05	NI-N*-NI-NI-NI-HD-HD-NG-HD-NG-NG-NG-NG-NS-HD-HD-NG-NG	PthA4
orange1.1g025708m.v1.1;pacid=18114747	178	+	0.431225	TATCAACCTCGTCTTCCTC	2.19017e-05	NI-N*-NI-NI-NI-HD-HD-NG-HD-NG-NG-NG-NG-NS-HD-HD-NG-NG	PthA4
orange1.1g015575m.v1.1;pacid=18093756	233	+	0.431213	TACTACTCTCATTTTCCTT	2.19101e-05	NI-N*-NI-NI-NI-HD-HD-NG-HD-NG-NG-NG-NG-NS-HD-HD-NG-NG	PthA4
orange1.1g017473m.v1.1;pacid=18093757	233	+	0.431213	TACTACTCTCATTTTCCTT	2.19101e-05	NI-N*-NI-NI-NI-HD-HD-NG-HD-NG-NG-NG-NG-NS-HD-HD-NG-NG	PthA4
orange1.1g032247m.v1.1;pacid=18093764	215	+	0.431213	TACTACTCTCATTTTCCTT	2.19101e-05	NI-N*-NI-NI-NI-HD-HD-NG-HD-NG-NG-NG-NG-NS-HD-HD-NG-NG	PthA4
orange1.1g032371m.v1.1;pacid=18093769	193	+	0.431213	TACTACTCTCATTTTCCTT	2.19101e-05	NI-N*-NI-NI-NI-HD-HD-NG-HD-NG-NG-NG-NG-NS-HD-HD-NG-NG	PthA4
orange1.1g038159m.v1.1;pacid=18134653	66	+	0.431007	TGTTAACTTATTTTTCCTT	2.20641e-05	NI-N*-NI-NI-NI-HD-HD-NG-HD-NG-NG-NG-NG-NS-HD-HD-NG-NG	PthA4
orange1.1g005931m.v1.1;pacid=18129548	257	+	0.43095	TAACAAATTCTTTTACATT	2.21067e-05	NI-N*-NI-NI-NI-HD-HD-NG-HD-NG-NG-NG-NG-NS-HD-HD-NG-NG	PthA4
orange1.1g026790m.v1.1;pacid=18127798	181	+	0.430848	TATCAAACTCTTTCAACAT	2.2183e-05	NI-N*-NI-NI-NI-HD-HD-NG-HD-NG-NG-NG-NG-NS-HD-HD-NG-NG	PthA4
orange1.1g026896m.v1.1;pacid=18127799	181	+	0.430848	TATCAAACTCTTTCAACAT	2.2183e-05	NI-N*-NI-NI-NI-HD-HD-NG-HD-NG-NG-NG-NG-NS-HD-HD-NG-NG	PthA4
orange1.1g028460m.v1.1;pacid=18127800	181	+	0.430848	TATCAAACTCTTTCAACAT	2.2183e-05	NI-N*-NI-NI-NI-HD-HD-NG-HD-NG-NG-NG-NG-NS-HD-HD-NG-NG	PthA4
orange1.1g028498m.v1.1;pacid=18127801	181	+	0.430848	TATCAAACTCTTTCAACAT	2.2183e-05	NI-N*-NI-NI-NI-HD-HD-NG-HD-NG-NG-NG-NG-NS-HD-HD-NG-NG	PthA4
orange1.1g029953m.v1.1;pacid=18127802	181	+	0.430848	TATCAAACTCTTTCAACAT	2.2183e-05	NI-N*-NI-NI-NI-HD-HD-NG-HD-NG-NG-NG-NG-NS-HD-HD-NG-NG	PthA4
orange1.1g016736m.v1.1;pacid=18129287	130	+	0.430546	GACAAACCCCTTTTAACAT	2.24107e-05	NI-N*-NI-NI-NI-HD-HD-NG-HD-NG-NG-NG-NG-NS-HD-HD-NG-NG	PthA4
orange1.1g008598m.v1.1;pacid=18096261	110	+	0.430395	TATAGATCTCCTCTACCTT	2.25256e-05	NI-N*-NI-NI-NI-HD-HD-NG-HD-NG-NG-NG-NG-NS-HD-HD-NG-NG	PthA4
orange1.1g025789m.v1.1;pacid=18106078	378	+	0.430232	AACAAACCTCTTTCCCATG	2.26496e-05	NI-N*-NI-NI-NI-HD-HD-NG-HD-NG-NG-NG-NG-NS-HD-HD-NG-NG	PthA4
orange1.1g046746m.v1.1;pacid=18110140	84	-	0.430216	TCTCATCCTCTCTTTCCTT	2.26621e-05	NI-N*-NI-NI-NI-HD-HD-NG-HD-NG-NG-NG-NG-NS-HD-HD-NG-NG	PthA4
[truncated: 2,017 more rows]

## Sheet: Cotton
# Seq-ID	Position	Strand	Score	Sequence	Approx. p-value	RVDs	TALE
[truncated: 8,392 more rows]

## Sheet: Tomato
# Seq-ID	Position	Strand	Score	Sequence	Approx. p-value	RVDs	TALE
[truncated: 4,995 more rows]

[truncated: 1 more sheets: Pepper]
